# Supplementary material
Source: MDPI journal article supplement (https://www.mdpi.com/2304-6740/5/2/26)
Supplement: s1 [file s1]

Archive with 6 entries (6 files):
- [K(DFForm)(18-Crown-6)].cif
- [K(DFForm)(18-Crown-6)]_Checkcif.pdf
- [K(DFForm)].cif
- [K(DFForm)_CheckCif.pdf
- [K2(DFForm)2(thf)2].cif
- [K2(DFForm)2(thf)2]_CheckCif.pdf
