# Supplementary material
Source: MDPI journal article supplement (https://www.mdpi.com/2304-6740/5/2/26)
Supplement: s1 [file s1 › [K(DFForm)(18-Crown-6)].cif]

data_monop2
_audit_creation_date              2014-04-10
_audit_creation_method
;
Olex2 1.2
(compiled 2014.03.20 svn.r2914 for OlexSys, GUI svn.r4816)
;
_shelxl_version_number            2013-2
_publ_contact_author_address      ?
_publ_contact_author_email        ?
_publ_contact_author_name         ''
_publ_contact_author_phone        ?
_publ_section_references
;
Bourhis, L.J., Dolomanov, O.V., Gildea, R.J., Howard, J.A.K., Puschmann, H.
 (2013). in preparation.

Dolomanov, O.V., Bourhis, L.J., Gildea, R.J, Howard, J.A.K. & Puschmann, H.
 (2009), J. Appl. Cryst. 42, 339-341.

Sheldrick, G.M. (2008). Acta Cryst. A64, 112-122.
;
_chemical_name_common             ?
_chemical_name_systematic
;
 ?
;
_chemical_formula_moiety          '2(C25 H31 F4 K N2 O6)'
_chemical_formula_sum             'C50 H62 F8 K2 N4 O12'
_chemical_formula_weight          1141.23
_chemical_melting_point           ?
loop_
  _atom_type_symbol
  _atom_type_description
  _atom_type_scat_dispersion_real
  _atom_type_scat_dispersion_imag
  _atom_type_scat_source
 'C' 'C' 0.0033 0.0016 'International Tables Vol C Tables 4.2.6.8 and 6.1.1.4'
 'H' 'H' 0.0000 0.0000 'International Tables Vol C Tables 4.2.6.8 and 6.1.1.4'
 'F' 'F' 0.0171 0.0103 'International Tables Vol C Tables 4.2.6.8 and 6.1.1.4'
 'K' 'K' 0.2009 0.2494 'International Tables Vol C Tables 4.2.6.8 and 6.1.1.4'
 'N' 'N' 0.0061 0.0033 'International Tables Vol C Tables 4.2.6.8 and 6.1.1.4'
 'O' 'O' 0.0106 0.0060 'International Tables Vol C Tables 4.2.6.8 and 6.1.1.4'

_shelx_space_group_comment
;
The symmetry employed for this shelxl refinement is uniquely defined
by the following loop, which should always be used as a source of
symmetry information in preference to the above space-group names.
They are only intended as comments.
;
_space_group_crystal_system       'monoclinic'
_space_group_IT_number            14
_space_group_name_H-M_alt         'P 1 21/n 1'
_space_group_name_Hall            '-P 2yn'
loop_
  _space_group_symop_operation_xyz
 'x, y, z'
 '-x+1/2, y+1/2, -z+1/2'
 '-x, -y, -z'
 'x-1/2, -y-1/2, z-1/2'

_cell_length_a                    10.9773(4)
_cell_length_b                    15.3047(5)
_cell_length_c                    31.3860(10)
_cell_angle_alpha                 90
_cell_angle_beta                  93.674(2)
_cell_angle_gamma                 90
_cell_volume                      5262.1(3)
_cell_formula_units_Z             4
_cell_measurement_reflns_used     9994
_cell_measurement_temperature     123.15
_cell_measurement_theta_max       28.349
_cell_measurement_theta_min       2.601
_shelx_estimated_absorpt_T_max    0.923
_shelx_estimated_absorpt_T_min    0.875
_exptl_absorpt_coefficient_mu     0.273
_exptl_absorpt_correction_T_max   0.7457
_exptl_absorpt_correction_T_min   0.6953
_exptl_absorpt_correction_type    multi-scan
_exptl_absorpt_process_details
;
SADABS-2008/1 (Bruker,2008) was used for absorption correction.
wR2(int) was 0.0774 before and 0.0422 after correction.
The Ratio of minimum to maximum transmission is 0.9324.
The \l/2 correction factor is 0.0015.
;
_exptl_crystal_colour             'clear colourless'
_exptl_crystal_colour_lustre      clear
_exptl_crystal_colour_modifier    .
_exptl_crystal_colour_primary     colourless
_exptl_crystal_density_diffrn     1.441
_exptl_crystal_density_meas       .
_exptl_crystal_density_method     ?
_exptl_crystal_description        block
_exptl_crystal_F_000              2384
_exptl_crystal_size_max           0.5
_exptl_crystal_size_mid           0.5
_exptl_crystal_size_min           0.3
_exptl_special_details
;
 ?
;
_exptl_transmission_factor_max    ?
_exptl_transmission_factor_min    ?
_diffrn_reflns_av_R_equivalents   0.0369
_diffrn_reflns_av_unetI/netI      0.0266
_diffrn_reflns_Laue_measured_fraction_full 0.996
_diffrn_reflns_Laue_measured_fraction_max 0.994
_diffrn_reflns_limit_h_max        14
_diffrn_reflns_limit_h_min        -14
_diffrn_reflns_limit_k_max        20
_diffrn_reflns_limit_k_min        -20
_diffrn_reflns_limit_l_max        40
_diffrn_reflns_limit_l_min        -41
_diffrn_reflns_number             78411
_diffrn_reflns_point_group_measured_fraction_full 0.996
_diffrn_reflns_point_group_measured_fraction_max 0.994
_diffrn_reflns_theta_full         27.500
_diffrn_reflns_theta_max          28.380
_diffrn_reflns_theta_min          1.300
_diffrn_ambient_temperature       123.15
_diffrn_detector_area_resol_mean  ?
_diffrn_measured_fraction_theta_full 0.996
_diffrn_measured_fraction_theta_max 0.994
_diffrn_measurement_device_type   'Bruker APEX-II CCD'
_diffrn_measurement_method        '\f and \w scans'
_diffrn_radiation_monochromator   'graphite'
_diffrn_radiation_type            MoK\a
_diffrn_radiation_wavelength      0.71073
_diffrn_source                    ?
_diffrn_standards_number          0
_reflns_Friedel_coverage          0.000
_reflns_Friedel_fraction_full     .
_reflns_Friedel_fraction_max      .
_reflns_number_gt                 10583
_reflns_number_total              13119
_reflns_special_details
;
 Reflections were merged by SHELXL according to the crystal
 class for the calculation of statistics and refinement.
 
 _reflns_Friedel_fraction is defined as the number of unique
 Friedel pairs measured divided by the number that would be
 possible theoretically, ignoring centric projections and
 systematic absences.
;
_reflns_threshold_expression      'I > 2\s(I)'
_computing_cell_refinement        ?
_computing_data_collection        ?
_computing_data_reduction         ?
_computing_molecular_graphics     'Olex2 (Dolomanov et al., 2009)'
_computing_publication_material   'Olex2 (Dolomanov et al., 2009)'
_computing_structure_refinement   'ShelXL (Sheldrick, 2008)'
_computing_structure_solution     'olex2.solve (Bourhis et al., 2013)'
_refine_diff_density_max          0.402
_refine_diff_density_min          -0.337
_refine_diff_density_rms          0.084
_refine_ls_extinction_coef        .
_refine_ls_extinction_method      none
_refine_ls_goodness_of_fit_ref    1.117
_refine_ls_hydrogen_treatment     constr
_refine_ls_matrix_type            full
_refine_ls_number_parameters      685
_refine_ls_number_reflns          13119
_refine_ls_number_restraints      0
_refine_ls_R_factor_all           0.0474
_refine_ls_R_factor_gt            0.0321
_refine_ls_restrained_S_all       1.117
_refine_ls_shift/su_max           0.003
_refine_ls_shift/su_mean          0.000
_refine_ls_structure_factor_coef  Fsqd
_refine_ls_weighting_details
;
 w=1/[\s^2^(Fo^2^)+(0.0668P)^2^+0.4259P]
 where P=(Fo^2^+2Fc^2^)/3
;
_refine_ls_weighting_scheme       calc
_refine_ls_wR_factor_gt           0.0920
_refine_ls_wR_factor_ref          0.1146
_refine_special_details
;
 ?
;
_olex2_refinement_description
;
1. Fixed Uiso
 At 1.2 times of:
  All C(H) groups, All C(H,H) groups
2.a Secondary CH2 refined with riding coordinates:
 C47(H47A,H47B), C40(H40A,H40B), C42(H42A,H42B), C17(H17A,H17B), C43(H43A,
 H43B), C15(H15A,H15B), C23(H23A,H23B), C39(H39A,H39B), C24(H24A,H24B),
 C25(H25A,H25B), C45(H45A,H45B), C14(H14A,H14B), C22(H22A,H22B), C46(H46A,H46B),
  C50(H50A,H50B), C18(H18A,H18B), C21(H21A,H21B), C19(H19A,H19B), C20(H20A,
 H20B), C49(H49A,H49B), C48(H48A,H48B), C44(H44A,H44B), C41(H41A,H41B),
 C16(H16A,H16B)
2.b Aromatic/amide H refined with riding coordinates:
 C29(H29), C10(H10), C28(H28), C35(H35), C27(H27), C11(H11), C12(H12), C4(H4),
 C37(H37), C3(H3), C2(H2), C7(H7), C32(H32), C36(H36)
;
_atom_sites_solution_hydrogens    geom
_atom_sites_solution_primary      iterative
_atom_sites_solution_secondary    ?
loop_
  _atom_site_label
  _atom_site_type_symbol
  _atom_site_fract_x
  _atom_site_fract_y
  _atom_site_fract_z
  _atom_site_U_iso_or_equiv
  _atom_site_adp_type
  _atom_site_occupancy
  _atom_site_site_symmetry_order
  _atom_site_calc_flag
  _atom_site_refinement_flags_posn
  _atom_site_refinement_flags_adp
  _atom_site_refinement_flags_occupancy
  _atom_site_disorder_assembly
  _atom_site_disorder_group
 K2 K 0.23726(3) 0.61094(2) 0.55586(2) 0.01901(8) Uani 1 1 d . . . . .
 K1 K 0.07127(3) 0.96296(2) 0.67108(2) 0.01925(8) Uani 1 1 d . . . . .
 F8 F 0.74981(8) 0.66539(7) 0.64095(3) 0.0317(2) Uani 1 1 d . . . . .
 F5 F 0.28195(8) 0.76908(7) 0.50743(3) 0.0293(2) Uani 1 1 d . . . . .
 F4 F -0.00453(9) 1.35974(6) 0.70134(3) 0.0277(2) Uani 1 1 d . . . . .
 F2 F 0.25688(9) 1.21118(6) 0.59510(3) 0.0297(2) Uani 1 1 d . . . . .
 F3 F -0.25598(8) 1.21276(6) 0.59772(3) 0.0283(2) Uani 1 1 d . . . . .
 F1 F 0.28055(9) 1.07133(6) 0.72868(3) 0.0314(2) Uani 1 1 d . . . . .
 F7 F 0.37213(9) 0.62487(7) 0.70090(3) 0.0361(2) Uani 1 1 d . . . . .
 F6 F 0.69835(8) 0.76656(7) 0.55365(3) 0.0326(2) Uani 1 1 d . . . . .
 O5 O 0.29248(9) 0.86252(7) 0.67837(3) 0.0224(2) Uani 1 1 d . . . . .
 O11 O 0.36080(10) 0.47441(7) 0.51997(4) 0.0282(3) Uani 1 1 d . . . . .
 O12 O 0.17151(10) 0.55534(7) 0.46959(4) 0.0259(2) Uani 1 1 d . . . . .
 O6 O 0.23671(10) 0.95393(7) 0.60341(3) 0.0224(2) Uani 1 1 d . . . . .
 O7 O 0.01077(9) 0.66891(7) 0.50628(3) 0.0227(2) Uani 1 1 d . . . . .
 O4 O 0.13847(10) 0.85953(7) 0.74562(3) 0.0248(2) Uani 1 1 d . . . . .
 O2 O -0.18048(10) 0.96789(7) 0.64600(4) 0.0274(2) Uani 1 1 d . . . . .
 O9 O 0.14885(9) 0.59154(7) 0.63644(3) 0.0257(2) Uani 1 1 d . . . . .
 O1 O -0.01610(10) 0.98055(7) 0.58055(4) 0.0239(2) Uani 1 1 d . . . . .
 O8 O 0.07812(9) 0.74139(7) 0.58826(4) 0.0237(2) Uani 1 1 d . . . . .
 O10 O 0.25893(9) 0.44539(7) 0.60000(4) 0.0251(2) Uani 1 1 d . . . . .
 O3 O -0.11029(10) 0.87439(7) 0.71880(4) 0.0269(2) Uani 1 1 d . . . . .
 N3 N 0.45726(10) 0.69835(8) 0.56147(4) 0.0183(2) Uani 1 1 d . . . . .
 N1 N 0.13338(11) 1.13966(8) 0.66464(4) 0.0184(2) Uani 1 1 d . . . . .
 N2 N -0.05357(11) 1.20510(8) 0.65173(4) 0.0186(2) Uani 1 1 d . . . . .
 N4 N 0.49443(11) 0.63517(8) 0.62789(4) 0.0211(3) Uani 1 1 d . . . . .
 C1 C 0.33573(14) 1.10731(9) 0.69535(5) 0.0213(3) Uani 1 1 d . . . . .
 C33 C 0.55598(13) 0.64486(9) 0.66792(5) 0.0195(3) Uani 1 1 d . . . . .
 C8 C -0.12097(13) 1.28105(9) 0.64838(4) 0.0172(3) Uani 1 1 d . . . . .
 C9 C -0.22813(13) 1.28459(9) 0.62179(5) 0.0194(3) Uani 1 1 d . . . . .
 C29 C 0.62697(15) 0.86669(11) 0.50169(5) 0.0275(3) Uani 1 1 d . . . . .
 H29 H 0.7078 0.8881 0.5002 0.033 Uiso 1 1 calc R . . . .
 C38 C 0.68092(14) 0.65906(10) 0.67553(5) 0.0228(3) Uani 1 1 d . . . . .
 C10 C -0.30581(14) 1.35469(10) 0.61778(5) 0.0242(3) Uani 1 1 d . . . . .
 H10 H -0.3761 1.3525 0.5985 0.029 Uiso 1 1 calc R . . . .
 C31 C 0.48659(12) 0.76518(9) 0.53461(4) 0.0169(3) Uani 1 1 d . . . . .
 C28 C 0.53266(15) 0.90096(11) 0.47561(5) 0.0275(3) Uani 1 1 d . . . . .
 H28 H 0.5476 0.9472 0.4565 0.033 Uiso 1 1 calc R . . . .
 C34 C 0.49443(14) 0.63669(10) 0.70537(5) 0.0240(3) Uani 1 1 d . . . . .
 C35 C 0.54851(17) 0.64294(10) 0.74603(5) 0.0287(4) Uani 1 1 d . . . . .
 H35 H 0.5014 0.6370 0.7702 0.034 Uiso 1 1 calc R . . . .
 C27 C 0.41645(14) 0.86729(10) 0.47765(5) 0.0246(3) Uani 1 1 d . . . . .
 H27 H 0.3508 0.8895 0.4596 0.029 Uiso 1 1 calc R . . . .
 C11 C -0.28040(14) 1.42882(10) 0.64220(5) 0.0249(3) Uani 1 1 d . . . . .
 H11 H -0.3328 1.4782 0.6398 0.030 Uiso 1 1 calc R . . . .
 C12 C -0.17752(14) 1.42971(10) 0.67010(5) 0.0229(3) Uani 1 1 d . . . . .
 H12 H -0.1589 1.4795 0.6874 0.028 Uiso 1 1 calc R . . . .
 C47 C 0.34865(16) 0.46874(11) 0.47445(6) 0.0328(4) Uani 1 1 d . . . . .
 H47A H 0.3854 0.4134 0.4652 0.039 Uiso 1 1 calc R . . . .
 H47B H 0.3936 0.5176 0.4620 0.039 Uiso 1 1 calc R . . . .
 C30 C 0.60231(13) 0.80128(10) 0.52979(5) 0.0213(3) Uani 1 1 d . . . . .
 C13 C -0.10263(13) 1.35775(9) 0.67254(4) 0.0192(3) Uani 1 1 d . . . . .
 C4 C 0.44851(14) 1.17595(10) 0.62806(5) 0.0268(3) Uani 1 1 d . . . . .
 H4 H 0.4866 1.1998 0.6043 0.032 Uiso 1 1 calc R . . . .
 C40 C -0.03839(13) 0.75309(10) 0.56638(5) 0.0253(3) Uani 1 1 d . . . . .
 H40A H -0.0745 0.8091 0.5751 0.030 Uiso 1 1 calc R . . . .
 H40B H -0.0938 0.7052 0.5738 0.030 Uiso 1 1 calc R . . . .
 C37 C 0.74022(16) 0.66587(11) 0.71540(5) 0.0303(4) Uani 1 1 d . . . . .
 H37 H 0.8258 0.6757 0.7185 0.036 Uiso 1 1 calc R . . . .
 C42 C 0.04840(15) 0.64260(11) 0.64755(5) 0.0287(4) Uani 1 1 d . . . . .
 H42A H 0.0411 0.6409 0.6788 0.034 Uiso 1 1 calc R . . . .
 H42B H -0.0281 0.6196 0.6333 0.034 Uiso 1 1 calc R . . . .
 C3 C 0.51826(15) 1.13888(10) 0.66169(6) 0.0291(4) Uani 1 1 d . . . . .
 H3 H 0.6047 1.1376 0.6614 0.035 Uiso 1 1 calc R . . . .
 C2 C 0.46075(15) 1.10373(10) 0.69567(6) 0.0267(3) Uani 1 1 d . . . . .
 H2 H 0.5070 1.0775 0.7189 0.032 Uiso 1 1 calc R . . . .
 C17 C -0.22817(15) 0.91186(12) 0.71310(6) 0.0336(4) Uani 1 1 d . . . . .
 H17A H -0.2274 0.9717 0.7251 0.040 Uiso 1 1 calc R . . . .
 H17B H -0.2875 0.8765 0.7281 0.040 Uiso 1 1 calc R . . . .
 C43 C 0.15110(15) 0.50777(11) 0.65579(5) 0.0288(3) Uani 1 1 d . . . . .
 H43A H 0.0785 0.4738 0.6453 0.035 Uiso 1 1 calc R . . . .
 H43B H 0.1497 0.5137 0.6872 0.035 Uiso 1 1 calc R . . . .
 C15 C -0.21818(14) 0.98410(11) 0.60263(5) 0.0292(4) Uani 1 1 d . . . . .
 H15A H -0.2955 1.0175 0.6008 0.035 Uiso 1 1 calc R . . . .
 H15B H -0.2321 0.9281 0.5873 0.035 Uiso 1 1 calc R . . . .
 C7 C 0.06643(13) 1.20935(9) 0.65452(4) 0.0169(3) Uani 1 1 d . . . . .
 H7 H 0.1055 1.2633 0.6492 0.020 Uiso 1 1 calc R . . . .
 C6 C 0.25904(13) 1.14492(9) 0.66298(5) 0.0183(3) Uani 1 1 d . . . . .
 C32 C 0.51278(12) 0.69721(9) 0.60031(5) 0.0171(3) Uani 1 1 d . . . . .
 H32 H 0.5678 0.7431 0.6084 0.021 Uiso 1 1 calc R . . . .
 C26 C 0.39727(13) 0.80150(10) 0.50596(5) 0.0197(3) Uani 1 1 d . . . . .
 C23 C 0.33108(14) 0.89019(10) 0.60624(5) 0.0234(3) Uani 1 1 d . . . . .
 H23A H 0.3950 0.9055 0.5867 0.028 Uiso 1 1 calc R . . . .
 H23B H 0.2975 0.8322 0.5979 0.028 Uiso 1 1 calc R . . . .
 C39 C -0.02426(14) 0.75335(10) 0.51932(5) 0.0265(3) Uani 1 1 d . . . . .
 H39A H -0.1024 0.7701 0.5040 0.032 Uiso 1 1 calc R . . . .
 H39B H 0.0386 0.7965 0.5123 0.032 Uiso 1 1 calc R . . . .
 C5 C 0.32323(14) 1.17783(10) 0.62943(5) 0.0221(3) Uani 1 1 d . . . . .
 C24 C 0.18643(15) 0.96294(11) 0.56089(5) 0.0255(3) Uani 1 1 d . . . . .
 H24A H 0.1595 0.9053 0.5495 0.031 Uiso 1 1 calc R . . . .
 H24B H 0.2488 0.9864 0.5425 0.031 Uiso 1 1 calc R . . . .
 C25 C 0.08023(15) 1.02394(10) 0.56080(5) 0.0253(3) Uani 1 1 d . . . . .
 H25A H 0.1035 1.0778 0.5767 0.030 Uiso 1 1 calc R . . . .
 H25B H 0.0535 1.0403 0.5311 0.030 Uiso 1 1 calc R . . . .
 C45 C 0.37116(15) 0.40951(11) 0.58782(6) 0.0309(4) Uani 1 1 d . . . . .
 H45A H 0.3888 0.3544 0.6036 0.037 Uiso 1 1 calc R . . . .
 H45B H 0.4386 0.4510 0.5950 0.037 Uiso 1 1 calc R . . . .
 C14 C -0.12062(15) 1.03513(10) 0.58269(5) 0.0279(3) Uani 1 1 d . . . . .
 H14A H -0.1497 1.0542 0.5537 0.034 Uiso 1 1 calc R . . . .
 H14B H -0.0996 1.0877 0.6000 0.034 Uiso 1 1 calc R . . . .
 C22 C 0.38446(13) 0.88766(10) 0.65123(5) 0.0236(3) Uani 1 1 d . . . . .
 H22A H 0.4527 0.8453 0.6537 0.028 Uiso 1 1 calc R . . . .
 H22B H 0.4166 0.9460 0.6597 0.028 Uiso 1 1 calc R . . . .
 C46 C 0.36187(16) 0.39229(10) 0.54106(6) 0.0328(4) Uani 1 1 d . . . . .
 H46A H 0.4324 0.3570 0.5329 0.039 Uiso 1 1 calc R . . . .
 H46B H 0.2860 0.3596 0.5330 0.039 Uiso 1 1 calc R . . . .
 C50 C 0.02029(15) 0.66390(12) 0.46124(5) 0.0293(4) Uani 1 1 d . . . . .
 H50A H 0.0830 0.7054 0.4523 0.035 Uiso 1 1 calc R . . . .
 H50B H -0.0588 0.6795 0.4462 0.035 Uiso 1 1 calc R . . . .
 C18 C -0.06955(16) 0.86930(11) 0.76273(5) 0.0306(4) Uani 1 1 d . . . . .
 H18A H -0.1331 0.8417 0.7793 0.037 Uiso 1 1 calc R . . . .
 H18B H -0.0533 0.9286 0.7743 0.037 Uiso 1 1 calc R . . . .
 C21 C 0.33884(14) 0.85232(10) 0.72151(5) 0.0252(3) Uani 1 1 d . . . . .
 H21A H 0.3571 0.9102 0.7345 0.030 Uiso 1 1 calc R . . . .
 H21B H 0.4152 0.8177 0.7226 0.030 Uiso 1 1 calc R . . . .
 C19 C 0.04431(16) 0.81606(11) 0.76635(5) 0.0287(3) Uani 1 1 d . . . . .
 H19A H 0.0701 0.8070 0.7968 0.034 Uiso 1 1 calc R . . . .
 H19B H 0.0288 0.7581 0.7531 0.034 Uiso 1 1 calc R . . . .
 C20 C 0.24470(15) 0.80650(10) 0.74546(5) 0.0266(3) Uani 1 1 d . . . . .
 H20A H 0.2242 0.7497 0.7317 0.032 Uiso 1 1 calc R . . . .
 H20B H 0.2769 0.7952 0.7751 0.032 Uiso 1 1 calc R . . . .
 C49 C 0.05492(15) 0.57267(12) 0.45010(5) 0.0298(4) Uani 1 1 d . . . . .
 H49A H -0.0053 0.5308 0.4604 0.036 Uiso 1 1 calc R . . . .
 H49B H 0.0563 0.5664 0.4187 0.036 Uiso 1 1 calc R . . . .
 C48 C 0.21779(16) 0.47218(11) 0.45812(6) 0.0297(4) Uani 1 1 d . . . . .
 H48A H 0.2110 0.4649 0.4267 0.036 Uiso 1 1 calc R . . . .
 H48B H 0.1709 0.4249 0.4710 0.036 Uiso 1 1 calc R . . . .
 C36 C 0.67244(17) 0.65804(11) 0.75102(5) 0.0315(4) Uani 1 1 d . . . . .
 H36 H 0.7114 0.6631 0.7788 0.038 Uiso 1 1 calc R . . . .
 C44 C 0.26467(15) 0.46180(11) 0.64469(5) 0.0292(4) Uani 1 1 d . . . . .
 H44A H 0.3368 0.4984 0.6529 0.035 Uiso 1 1 calc R . . . .
 H44B H 0.2728 0.4059 0.6605 0.035 Uiso 1 1 calc R . . . .
 C41 C 0.06991(15) 0.73462(11) 0.63327(5) 0.0301(4) Uani 1 1 d . . . . .
 H41A H 0.0023 0.7721 0.6419 0.036 Uiso 1 1 calc R . . . .
 H41B H 0.1465 0.7566 0.6478 0.036 Uiso 1 1 calc R . . . .
 C16 C -0.26420(14) 0.91458(12) 0.66649(6) 0.0333(4) Uani 1 1 d . . . . .
 H16A H -0.2638 0.8548 0.6545 0.040 Uiso 1 1 calc R . . . .
 H16B H -0.3477 0.9386 0.6618 0.040 Uiso 1 1 calc R . . . .

loop_
  _atom_site_aniso_label
  _atom_site_aniso_U_11
  _atom_site_aniso_U_22
  _atom_site_aniso_U_33
  _atom_site_aniso_U_23
  _atom_site_aniso_U_13
  _atom_site_aniso_U_12
 K2 0.01638(14) 0.01658(14) 0.02449(17) -0.00050(11) 0.00470(12) -0.00086(11)
 K1 0.01785(15) 0.01672(14) 0.02315(17) 0.00300(11) 0.00113(12) -0.00066(11)
 F8 0.0190(4) 0.0486(6) 0.0280(5) 0.0014(4) 0.0064(4) 0.0016(4)
 F5 0.0136(4) 0.0430(6) 0.0307(5) 0.0032(4) -0.0042(4) -0.0036(4)
 F4 0.0310(5) 0.0274(5) 0.0232(5) -0.0049(4) -0.0099(4) -0.0018(4)
 F2 0.0288(5) 0.0385(5) 0.0218(5) 0.0041(4) 0.0022(4) -0.0044(4)
 F3 0.0220(4) 0.0275(5) 0.0340(5) -0.0110(4) -0.0082(4) -0.0006(4)
 F1 0.0338(5) 0.0321(5) 0.0288(5) 0.0105(4) 0.0058(4) 0.0094(4)
 F7 0.0275(5) 0.0487(6) 0.0334(6) -0.0065(4) 0.0136(4) -0.0106(4)
 F6 0.0124(4) 0.0442(6) 0.0409(6) 0.0156(4) -0.0019(4) 0.0000(4)
 O5 0.0180(5) 0.0273(5) 0.0214(6) -0.0014(4) -0.0023(4) 0.0003(4)
 O11 0.0275(6) 0.0196(5) 0.0385(7) -0.0055(5) 0.0093(5) 0.0008(4)
 O12 0.0227(5) 0.0280(6) 0.0270(6) -0.0087(4) 0.0021(4) -0.0036(4)
 O6 0.0235(5) 0.0234(5) 0.0204(5) -0.0043(4) 0.0014(4) 0.0031(4)
 O7 0.0209(5) 0.0241(5) 0.0232(6) 0.0027(4) 0.0025(4) -0.0002(4)
 O4 0.0272(6) 0.0215(5) 0.0256(6) 0.0055(4) 0.0005(5) 0.0002(4)
 O2 0.0203(5) 0.0270(6) 0.0343(7) 0.0052(5) -0.0043(5) -0.0032(4)
 O9 0.0179(5) 0.0332(6) 0.0265(6) 0.0052(5) 0.0057(4) 0.0005(4)
 O1 0.0220(5) 0.0171(5) 0.0321(6) 0.0011(4) -0.0010(4) 0.0018(4)
 O8 0.0143(5) 0.0243(5) 0.0325(6) -0.0048(4) 0.0017(4) -0.0013(4)
 O10 0.0182(5) 0.0251(6) 0.0316(6) 0.0021(4) -0.0015(4) 0.0011(4)
 O3 0.0233(6) 0.0298(6) 0.0282(6) 0.0041(4) 0.0060(5) 0.0023(4)
 N3 0.0137(5) 0.0190(6) 0.0223(6) -0.0023(5) 0.0016(5) -0.0007(4)
 N1 0.0175(6) 0.0169(6) 0.0209(6) -0.0004(4) 0.0018(5) -0.0013(4)
 N2 0.0188(6) 0.0178(6) 0.0189(6) 0.0010(4) -0.0012(5) -0.0019(5)
 N4 0.0212(6) 0.0225(6) 0.0199(7) -0.0028(5) 0.0042(5) -0.0036(5)
 C1 0.0260(7) 0.0151(6) 0.0230(8) -0.0034(5) 0.0027(6) 0.0024(5)
 C33 0.0230(7) 0.0142(6) 0.0215(8) -0.0020(5) 0.0037(6) 0.0012(5)
 C8 0.0179(7) 0.0189(7) 0.0152(7) 0.0017(5) 0.0035(5) -0.0033(5)
 C9 0.0186(7) 0.0208(7) 0.0189(7) -0.0025(5) 0.0012(5) -0.0031(5)
 C29 0.0212(7) 0.0316(8) 0.0296(9) 0.0028(6) 0.0005(6) -0.0084(6)
 C38 0.0234(7) 0.0221(7) 0.0236(8) 0.0004(6) 0.0060(6) 0.0034(6)
 C10 0.0165(7) 0.0295(8) 0.0265(8) 0.0011(6) 0.0006(6) 0.0007(6)
 C31 0.0152(6) 0.0171(6) 0.0183(7) -0.0065(5) 0.0014(5) 0.0013(5)
 C28 0.0308(8) 0.0269(8) 0.0243(8) 0.0053(6) -0.0017(7) -0.0053(6)
 C34 0.0260(8) 0.0187(7) 0.0281(8) -0.0026(6) 0.0074(6) -0.0023(6)
 C35 0.0438(10) 0.0218(8) 0.0215(8) -0.0011(6) 0.0093(7) 0.0014(7)
 C27 0.0242(8) 0.0282(8) 0.0205(8) -0.0016(6) -0.0053(6) 0.0026(6)
 C11 0.0221(7) 0.0237(7) 0.0299(9) 0.0022(6) 0.0089(6) 0.0033(6)
 C12 0.0270(8) 0.0202(7) 0.0224(8) -0.0020(6) 0.0077(6) -0.0029(6)
 C47 0.0323(9) 0.0286(8) 0.0397(10) -0.0080(7) 0.0188(8) -0.0005(7)
 C30 0.0140(6) 0.0247(7) 0.0249(8) -0.0004(6) -0.0022(6) 0.0012(5)
 C13 0.0200(7) 0.0231(7) 0.0145(7) 0.0013(5) -0.0002(5) -0.0038(5)
 C4 0.0245(8) 0.0248(8) 0.0322(9) -0.0079(6) 0.0093(7) -0.0053(6)
 C40 0.0144(7) 0.0201(7) 0.0413(10) -0.0059(6) 0.0012(6) 0.0012(5)
 C37 0.0273(8) 0.0313(9) 0.0314(9) -0.0014(7) -0.0043(7) 0.0043(7)
 C42 0.0203(7) 0.0404(9) 0.0261(9) -0.0062(7) 0.0068(6) -0.0024(7)
 C3 0.0192(7) 0.0245(8) 0.0437(10) -0.0123(7) 0.0028(7) 0.0004(6)
 C2 0.0245(8) 0.0199(7) 0.0350(9) -0.0074(6) -0.0039(7) 0.0055(6)
 C17 0.0221(8) 0.0317(9) 0.0484(11) 0.0062(8) 0.0126(8) 0.0018(7)
 C43 0.0287(8) 0.0347(9) 0.0230(8) 0.0068(6) 0.0020(6) -0.0074(7)
 C15 0.0210(7) 0.0329(9) 0.0325(9) -0.0032(7) -0.0079(7) 0.0079(6)
 C7 0.0219(7) 0.0150(6) 0.0135(7) -0.0002(5) 0.0002(5) -0.0037(5)
 C6 0.0211(7) 0.0128(6) 0.0209(7) -0.0059(5) 0.0011(6) -0.0005(5)
 C32 0.0115(6) 0.0180(6) 0.0222(7) -0.0053(5) 0.0040(5) 0.0009(5)
 C26 0.0143(6) 0.0252(7) 0.0196(7) -0.0066(6) -0.0002(5) -0.0004(5)
 C23 0.0219(7) 0.0211(7) 0.0279(8) -0.0059(6) 0.0069(6) 0.0010(6)
 C39 0.0176(7) 0.0208(7) 0.0407(10) 0.0055(6) -0.0002(6) 0.0008(6)
 C5 0.0248(7) 0.0205(7) 0.0210(8) -0.0041(5) 0.0011(6) -0.0026(6)
 C24 0.0277(8) 0.0290(8) 0.0201(8) -0.0002(6) 0.0042(6) -0.0058(6)
 C25 0.0314(8) 0.0212(7) 0.0227(8) 0.0044(6) -0.0027(6) -0.0045(6)
 C45 0.0213(8) 0.0224(8) 0.0484(11) 0.0022(7) -0.0015(7) 0.0057(6)
 C14 0.0306(8) 0.0244(8) 0.0277(9) 0.0015(6) -0.0059(7) 0.0110(6)
 C22 0.0161(7) 0.0224(7) 0.0324(9) -0.0075(6) 0.0026(6) 0.0020(5)
 C46 0.0267(8) 0.0181(7) 0.0540(12) -0.0044(7) 0.0052(8) 0.0043(6)
 C50 0.0215(8) 0.0434(10) 0.0227(8) 0.0071(7) -0.0010(6) -0.0015(7)
 C18 0.0368(9) 0.0313(9) 0.0246(9) 0.0022(6) 0.0101(7) -0.0044(7)
 C21 0.0242(8) 0.0240(8) 0.0261(8) -0.0005(6) -0.0090(6) 0.0053(6)
 C19 0.0371(9) 0.0273(8) 0.0217(8) 0.0067(6) 0.0022(7) -0.0055(7)
 C20 0.0321(8) 0.0219(7) 0.0246(8) 0.0026(6) -0.0076(6) 0.0049(6)
 C49 0.0251(8) 0.0436(10) 0.0206(8) -0.0040(7) -0.0002(6) -0.0085(7)
 C48 0.0361(9) 0.0258(8) 0.0284(9) -0.0104(6) 0.0124(7) -0.0081(7)
 C36 0.0444(10) 0.0272(8) 0.0221(8) -0.0021(6) -0.0043(7) 0.0061(7)
 C44 0.0289(8) 0.0286(8) 0.0290(9) 0.0074(6) -0.0071(7) -0.0029(6)
 C41 0.0253(8) 0.0329(9) 0.0324(9) -0.0148(7) 0.0042(7) -0.0035(7)
 C16 0.0166(7) 0.0311(9) 0.0520(12) 0.0067(8) 0.0015(7) -0.0029(6)

_geom_special_details
;
 All esds (except the esd in the dihedral angle between two l.s. planes)
 are estimated using the full covariance matrix.  The cell esds are taken
 into account individually in the estimation of esds in distances, angles
 and torsion angles; correlations between esds in cell parameters are only
 used when they are defined by crystal symmetry.  An approximate (isotropic)
 treatment of cell esds is used for estimating esds involving l.s. planes.
;
loop_
  _geom_bond_atom_site_label_1
  _geom_bond_atom_site_label_2
  _geom_bond_distance
  _geom_bond_site_symmetry_2
  _geom_bond_publ_flag
 K2 F5 2.9162(10) . ?
 K2 O11 2.7693(11) . ?
 K2 O12 2.8852(11) . ?
 K2 O7 2.9823(11) . ?
 K2 O9 2.7825(11) . ?
 K2 O8 2.8810(11) . ?
 K2 O10 2.8902(11) . ?
 K2 N3 2.7566(12) . ?
 K1 F1 3.2809(11) . ?
 K1 O5 2.8706(11) . ?
 K1 O6 2.8849(11) . ?
 K1 O4 2.8813(11) . ?
 K1 O2 2.8255(11) . ?
 K1 O1 2.9525(11) . ?
 K1 O3 2.9044(12) . ?
 K1 N1 2.7994(12) . ?
 K1 C6 3.4836(14) . ?
 F8 C38 1.3654(18) . ?
 F5 C26 1.3632(16) . ?
 F4 C13 1.3613(16) . ?
 F2 C5 1.3606(17) . ?
 F3 C9 1.3576(16) . ?
 F1 C1 1.3584(18) . ?
 F7 C34 1.3529(18) . ?
 F6 C30 1.3614(16) . ?
 O5 C22 1.4153(19) . ?
 O5 C21 1.4243(18) . ?
 O11 C47 1.429(2) . ?
 O11 C46 1.420(2) . ?
 O12 C49 1.4080(19) . ?
 O12 C48 1.4250(19) . ?
 O6 C23 1.4216(18) . ?
 O6 C24 1.4177(18) . ?
 O7 C39 1.4162(19) . ?
 O7 C50 1.4260(19) . ?
 O4 C19 1.4214(19) . ?
 O4 C20 1.4210(19) . ?
 O2 C15 1.4190(19) . ?
 O2 C16 1.4142(19) . ?
 O9 C42 1.4133(19) . ?
 O9 C43 1.418(2) . ?
 O1 C25 1.4237(19) . ?
 O1 C14 1.4242(18) . ?
 O8 C40 1.4237(18) . ?
 O8 C41 1.425(2) . ?
 O10 C45 1.4232(19) . ?
 O10 C44 1.422(2) . ?
 O3 C17 1.4162(19) . ?
 O3 C18 1.424(2) . ?
 N3 C31 1.3765(19) . ?
 N3 C32 1.3276(18) . ?
 N1 C7 1.3224(18) . ?
 N1 C6 1.3861(18) . ?
 N2 C8 1.3783(18) . ?
 N2 C7 1.3161(18) . ?
 N4 C33 1.3957(19) . ?
 N4 C32 1.3090(19) . ?
 C1 C2 1.373(2) . ?
 C1 C6 1.401(2) . ?
 C33 C38 1.394(2) . ?
 C33 C34 1.399(2) . ?
 C8 C9 1.399(2) . ?
 C8 C13 1.405(2) . ?
 C9 C10 1.371(2) . ?
 C29 C28 1.381(2) . ?
 C29 C30 1.373(2) . ?
 C38 C37 1.377(2) . ?
 C10 C11 1.387(2) . ?
 C31 C30 1.402(2) . ?
 C31 C26 1.402(2) . ?
 C28 C27 1.381(2) . ?
 C34 C35 1.376(2) . ?
 C35 C36 1.379(3) . ?
 C27 C26 1.368(2) . ?
 C11 C12 1.384(2) . ?
 C12 C13 1.374(2) . ?
 C47 C48 1.495(3) . ?
 C4 C3 1.385(2) . ?
 C4 C5 1.379(2) . ?
 C40 C39 1.495(2) . ?
 C37 C36 1.387(3) . ?
 C42 C41 1.501(2) . ?
 C3 C2 1.383(3) . ?
 C17 C16 1.491(3) . ?
 C43 C44 1.492(2) . ?
 C15 C14 1.495(2) . ?
 C6 C5 1.398(2) . ?
 C23 C22 1.494(2) . ?
 C24 C25 1.493(2) . ?
 C45 C46 1.488(3) . ?
 C50 C49 1.494(3) . ?
 C18 C19 1.490(2) . ?
 C21 C20 1.491(2) . ?

loop_
  _geom_angle_atom_site_label_1
  _geom_angle_atom_site_label_2
  _geom_angle_atom_site_label_3
  _geom_angle
  _geom_angle_site_symmetry_1
  _geom_angle_site_symmetry_3
  _geom_angle_publ_flag
 F5 K2 O7 69.12(3) . . ?
 O11 K2 F5 108.13(3) . . ?
 O11 K2 O12 59.70(3) . . ?
 O11 K2 O7 115.21(3) . . ?
 O11 K2 O9 119.84(4) . . ?
 O11 K2 O8 172.00(3) . . ?
 O11 K2 O10 60.40(3) . . ?
 O12 K2 F5 78.23(3) . . ?
 O12 K2 O7 56.50(3) . . ?
 O12 K2 O10 101.49(3) . . ?
 O9 K2 F5 129.97(3) . . ?
 O9 K2 O12 137.79(3) . . ?
 O9 K2 O7 100.27(3) . . ?
 O9 K2 O8 59.89(3) . . ?
 O9 K2 O10 59.57(3) . . ?
 O8 K2 F5 74.63(3) . . ?
 O8 K2 O12 114.51(3) . . ?
 O8 K2 O7 58.26(3) . . ?
 O8 K2 O10 118.12(3) . . ?
 O10 K2 F5 165.01(3) . . ?
 O10 K2 O7 123.45(3) . . ?
 N3 K2 F5 56.94(3) . . ?
 N3 K2 O11 86.69(3) . . ?
 N3 K2 O12 111.63(3) . . ?
 N3 K2 O7 125.92(3) . . ?
 N3 K2 O9 110.42(4) . . ?
 N3 K2 O8 100.93(3) . . ?
 N3 K2 O10 110.49(3) . . ?
 F1 K1 C6 40.48(3) . . ?
 O5 K1 F1 70.60(3) . . ?
 O5 K1 O6 57.58(3) . . ?
 O5 K1 O4 57.98(3) . . ?
 O5 K1 O1 110.27(3) . . ?
 O5 K1 O3 108.29(3) . . ?
 O5 K1 C6 86.13(3) . . ?
 O6 K1 F1 88.76(3) . . ?
 O6 K1 O1 58.45(3) . . ?
 O6 K1 O3 147.40(3) . . ?
 O6 K1 C6 65.25(3) . . ?
 O4 K1 F1 72.34(3) . . ?
 O4 K1 O6 115.53(3) . . ?
 O4 K1 O1 151.88(3) . . ?
 O4 K1 O3 58.22(3) . . ?
 O4 K1 C6 112.12(3) . . ?
 O2 K1 F1 141.06(3) . . ?
 O2 K1 O5 147.54(3) . . ?
 O2 K1 O6 116.54(3) . . ?
 O2 K1 O4 115.84(3) . . ?
 O2 K1 O1 58.52(3) . . ?
 O2 K1 O3 57.65(3) . . ?
 O2 K1 C6 122.07(3) . . ?
 O1 K1 F1 131.07(3) . . ?
 O1 K1 C6 90.81(3) . . ?
 O3 K1 F1 115.54(3) . . ?
 O3 K1 O1 110.34(3) . . ?
 O3 K1 C6 147.08(3) . . ?
 N1 K1 F1 52.14(3) . . ?
 N1 K1 O5 108.32(3) . . ?
 N1 K1 O6 79.94(3) . . ?
 N1 K1 O4 122.58(3) . . ?
 N1 K1 O2 101.10(3) . . ?
 N1 K1 O1 84.72(3) . . ?
 N1 K1 O3 131.79(4) . . ?
 N1 K1 C6 22.26(3) . . ?
 C26 F5 K2 120.49(8) . . ?
 C1 F1 K1 96.42(8) . . ?
 C22 O5 K1 116.04(8) . . ?
 C22 O5 C21 112.13(11) . . ?
 C21 O5 K1 112.54(8) . . ?
 C47 O11 K2 115.83(9) . . ?
 C46 O11 K2 117.89(9) . . ?
 C46 O11 C47 114.18(13) . . ?
 C49 O12 K2 121.20(9) . . ?
 C49 O12 C48 112.78(12) . . ?
 C48 O12 K2 115.39(9) . . ?
 C23 O6 K1 118.52(9) . . ?
 C24 O6 K1 117.57(9) . . ?
 C24 O6 C23 111.34(11) . . ?
 C39 O7 K2 110.70(8) . . ?
 C39 O7 C50 111.97(12) . . ?
 C50 O7 K2 112.93(8) . . ?
 C19 O4 K1 118.23(9) . . ?
 C20 O4 K1 118.58(9) . . ?
 C20 O4 C19 110.81(12) . . ?
 C15 O2 K1 119.46(9) . . ?
 C16 O2 K1 120.69(9) . . ?
 C16 O2 C15 112.28(13) . . ?
 C42 O9 K2 119.23(9) . . ?
 C42 O9 C43 112.76(12) . . ?
 C43 O9 K2 119.22(9) . . ?
 C25 O1 K1 104.88(8) . . ?
 C25 O1 C14 111.72(12) . . ?
 C14 O1 K1 102.77(9) . . ?
 C40 O8 K2 117.59(8) . . ?
 C40 O8 C41 112.05(12) . . ?
 C41 O8 K2 112.21(9) . . ?
 C45 O10 K2 104.81(9) . . ?
 C44 O10 K2 108.36(9) . . ?
 C44 O10 C45 110.40(12) . . ?
 C17 O3 K1 113.42(9) . . ?
 C17 O3 C18 111.86(13) . . ?
 C18 O3 K1 109.97(9) . . ?
 C31 N3 K2 124.04(9) . . ?
 C32 N3 K2 113.64(9) . . ?
 C32 N3 C31 117.42(12) . . ?
 C7 N1 K1 131.48(9) . . ?
 C7 N1 C6 118.90(12) . . ?
 C6 N1 K1 107.84(8) . . ?
 C7 N2 C8 119.57(12) . . ?
 C32 N4 C33 115.60(12) . . ?
 F1 C1 C2 118.23(14) . . ?
 F1 C1 C6 116.62(13) . . ?
 C2 C1 C6 125.15(15) . . ?
 N4 C33 C34 121.00(14) . . ?
 C38 C33 N4 125.81(13) . . ?
 C38 C33 C34 113.13(14) . . ?
 N2 C8 C9 120.32(13) . . ?
 N2 C8 C13 127.29(13) . . ?
 C9 C8 C13 112.06(13) . . ?
 F3 C9 C8 116.83(12) . . ?
 F3 C9 C10 117.78(13) . . ?
 C10 C9 C8 125.38(14) . . ?
 C30 C29 C28 119.11(14) . . ?
 F8 C38 C33 117.63(13) . . ?
 F8 C38 C37 117.60(14) . . ?
 C37 C38 C33 124.76(15) . . ?
 C9 C10 C11 119.16(14) . . ?
 N3 C31 C30 127.43(13) . . ?
 N3 C31 C26 120.39(13) . . ?
 C26 C31 C30 112.06(13) . . ?
 C27 C28 C29 119.36(15) . . ?
 F7 C34 C33 117.02(14) . . ?
 F7 C34 C35 118.16(14) . . ?
 C35 C34 C33 124.77(15) . . ?
 C34 C35 C36 118.76(15) . . ?
 C26 C27 C28 119.06(14) . . ?
 C12 C11 C10 118.99(14) . . ?
 C13 C12 C11 119.25(14) . . ?
 O11 C47 C48 111.52(13) . . ?
 F6 C30 C29 117.42(13) . . ?
 F6 C30 C31 117.50(13) . . ?
 C29 C30 C31 125.03(14) . . ?
 F4 C13 C8 117.19(13) . . ?
 F4 C13 C12 117.67(13) . . ?
 C12 C13 C8 125.12(14) . . ?
 C5 C4 C3 119.25(15) . . ?
 O8 C40 C39 109.27(12) . . ?
 C38 C37 C36 118.63(16) . . ?
 O9 C42 C41 107.76(13) . . ?
 C2 C3 C4 119.32(15) . . ?
 C1 C2 C3 118.97(15) . . ?
 O3 C17 C16 108.55(14) . . ?
 O9 C43 C44 108.56(13) . . ?
 O2 C15 C14 108.68(13) . . ?
 N2 C7 N1 120.97(13) . . ?
 N1 C6 K1 49.90(7) . . ?
 N1 C6 C1 120.15(13) . . ?
 N1 C6 C5 126.87(13) . . ?
 C1 C6 K1 87.11(9) . . ?
 C5 C6 K1 132.22(9) . . ?
 C5 C6 C1 112.70(13) . . ?
 N4 C32 N3 122.39(13) . . ?
 F5 C26 C31 116.53(13) . . ?
 F5 C26 C27 118.15(13) . . ?
 C27 C26 C31 125.31(14) . . ?
 O6 C23 C22 108.49(12) . . ?
 O7 C39 C40 109.29(12) . . ?
 F2 C5 C4 117.88(14) . . ?
 F2 C5 C6 117.49(13) . . ?
 C4 C5 C6 124.59(15) . . ?
 O6 C24 C25 108.62(13) . . ?
 O1 C25 C24 108.01(12) . . ?
 O10 C45 C46 109.11(13) . . ?
 O1 C14 C15 108.32(13) . . ?
 O5 C22 C23 108.91(12) . . ?
 O11 C46 C45 107.51(13) . . ?
 O7 C50 C49 108.55(13) . . ?
 O3 C18 C19 108.27(13) . . ?
 O5 C21 C20 108.29(12) . . ?
 O4 C19 C18 109.89(13) . . ?
 O4 C20 C21 109.18(12) . . ?
 O12 C49 C50 108.18(13) . . ?
 O12 C48 C47 107.16(13) . . ?
 C35 C36 C37 119.93(16) . . ?
 O10 C44 C43 109.18(13) . . ?
 O8 C41 C42 112.67(13) . . ?
 O2 C16 C17 108.84(14) . . ?

_shelx_res_file
;
TITL
CELL 0.71073 10.9773 15.3047 31.386 90 93.674 90
ZERR 4 0.0004 0.0005 0.001 0 0.002 0
LATT 1
SYMM 0.5-X,0.5+Y,0.5-Z

SFAC C H F K N O
UNIT 200 248 32 8 16 48

L.S. 5
PLAN  20
SIZE 0.5 0.5 0.3
TEMP -150
FREE C32 K2
FREE C45 K2
fmap
acta 55
MORE -2
REM <HKL>C:/Users/staff/Documents/Crystals/Crystals/APEX/[K(26FForm)(Crown)]/D
REM W04072012/work/monop2.hkl</HKL>

WGHT    0.066800    0.425900
FVAR       0.09196
K2    4    0.237261    0.610936    0.555855    11.00000    0.01638    0.01658 =
         0.02449   -0.00050    0.00470   -0.00086
K1    4    0.071272    0.962959    0.671079    11.00000    0.01785    0.01672 =
         0.02315    0.00300    0.00113   -0.00066
F8    3    0.749814    0.665389    0.640954    11.00000    0.01899    0.04865 =
         0.02797    0.00144    0.00638    0.00164
F5    3    0.281949    0.769080    0.507431    11.00000    0.01355    0.04296 =
         0.03066    0.00321   -0.00417   -0.00358
F4    3   -0.004527    1.359737    0.701344    11.00000    0.03097    0.02743 =
         0.02322   -0.00488   -0.00987   -0.00184
F2    3    0.256878    1.211180    0.595098    11.00000    0.02883    0.03850 =
         0.02175    0.00411    0.00224   -0.00438
F3    3   -0.255980    1.212756    0.597718    11.00000    0.02199    0.02754 =
         0.03399   -0.01101   -0.00820   -0.00056
F1    3    0.280551    1.071327    0.728676    11.00000    0.03382    0.03214 =
         0.02877    0.01052    0.00578    0.00935
F7    3    0.372135    0.624867    0.700896    11.00000    0.02752    0.04872 =
         0.03341   -0.00648    0.01358   -0.01055
F6    3    0.698349    0.766562    0.553650    11.00000    0.01244    0.04416 =
         0.04086    0.01555   -0.00188   -0.00004
O5    6    0.292482    0.862522    0.678368    11.00000    0.01799    0.02725 =
         0.02143   -0.00141   -0.00235    0.00030
O11   6    0.360801    0.474413    0.519972    11.00000    0.02748    0.01959 =
         0.03850   -0.00551    0.00928    0.00084
O12   6    0.171511    0.555337    0.469595    11.00000    0.02271    0.02796 =
         0.02702   -0.00873    0.00208   -0.00359
O6    6    0.236707    0.953925    0.603408    11.00000    0.02346    0.02338 =
         0.02041   -0.00428    0.00136    0.00308
O7    6    0.010772    0.668910    0.506277    11.00000    0.02095    0.02407 =
         0.02324    0.00271    0.00250   -0.00020
O4    6    0.138469    0.859526    0.745616    11.00000    0.02724    0.02145 =
         0.02561    0.00554    0.00052    0.00022
O2    6   -0.180477    0.967893    0.645999    11.00000    0.02029    0.02695 =
         0.03431    0.00523   -0.00428   -0.00324
O9    6    0.148846    0.591536    0.636443    11.00000    0.01792    0.03317 =
         0.02650    0.00516    0.00568    0.00048
O1    6   -0.016102    0.980551    0.580546    11.00000    0.02198    0.01713 =
         0.03214    0.00111   -0.00101    0.00185
O8    6    0.078117    0.741386    0.588263    11.00000    0.01429    0.02428 =
         0.03252   -0.00485    0.00168   -0.00135
O10   6    0.258934    0.445393    0.600000    11.00000    0.01815    0.02515 =
         0.03156    0.00206   -0.00155    0.00112
O3    6   -0.110288    0.874391    0.718803    11.00000    0.02329    0.02979 =
         0.02816    0.00412    0.00604    0.00230
N3    5    0.457260    0.698352    0.561467    11.00000    0.01375    0.01897 =
         0.02226   -0.00231    0.00159   -0.00075
N1    5    0.133380    1.139657    0.664635    11.00000    0.01748    0.01691 =
         0.02092   -0.00043    0.00177   -0.00130
N2    5   -0.053565    1.205104    0.651725    11.00000    0.01883    0.01779 =
         0.01885    0.00104   -0.00121   -0.00190
N4    5    0.494431    0.635173    0.627887    11.00000    0.02117    0.02249 =
         0.01986   -0.00280    0.00416   -0.00363
C1    1    0.335729    1.107313    0.695353    11.00000    0.02605    0.01507 =
         0.02301   -0.00339    0.00272    0.00240
C33   1    0.555979    0.644864    0.667915    11.00000    0.02304    0.01420 =
         0.02149   -0.00202    0.00375    0.00117
C8    1   -0.120968    1.281052    0.648382    11.00000    0.01790    0.01890 =
         0.01517    0.00165    0.00353   -0.00331
C9    1   -0.228133    1.284588    0.621786    11.00000    0.01857    0.02085 =
         0.01892   -0.00254    0.00120   -0.00314
C29   1    0.626971    0.866687    0.501689    11.00000    0.02116    0.03162 =
         0.02963    0.00283    0.00052   -0.00839
AFIX  43
H29   2    0.707813    0.888104    0.500194    11.00000   -1.20000
AFIX   0
C38   1    0.680923    0.659064    0.675531    11.00000    0.02336    0.02212 =
         0.02357    0.00041    0.00604    0.00336

C10   1   -0.305814    1.354692    0.617781    11.00000    0.01650    0.02954 =
         0.02648    0.00109    0.00057    0.00069
AFIX  43
H10   2   -0.376146    1.352530    0.598529    11.00000   -1.20000
AFIX   0

C31   1    0.486586    0.765178    0.534611    11.00000    0.01524    0.01710 =
         0.01835   -0.00654    0.00141    0.00129
C28   1    0.532659    0.900958    0.475608    11.00000    0.03076    0.02688 =
         0.02433    0.00528   -0.00175   -0.00535
AFIX  43
H28   2    0.547594    0.947238    0.456457    11.00000   -1.20000
AFIX   0
C34   1    0.494425    0.636686    0.705371    11.00000    0.02596    0.01869 =
         0.02809   -0.00261    0.00738   -0.00233
C35   1    0.548515    0.642944    0.746026    11.00000    0.04378    0.02177 =
         0.02154   -0.00109    0.00934    0.00137
AFIX  43
H35   2    0.501363    0.636975    0.770205    11.00000   -1.20000
AFIX   0
C27   1    0.416453    0.867289    0.477645    11.00000    0.02422    0.02816 =
         0.02046   -0.00163   -0.00534    0.00262
AFIX  43
H27   2    0.350767    0.889493    0.459641    11.00000   -1.20000
AFIX   0

C11   1   -0.280396    1.428824    0.642199    11.00000    0.02214    0.02368 =
         0.02994    0.00216    0.00888    0.00331
AFIX  43
H11   2   -0.332800    1.478217    0.639804    11.00000   -1.20000
AFIX   0
C12   1   -0.177524    1.429711    0.670102    11.00000    0.02697    0.02020 =
         0.02243   -0.00195    0.00772   -0.00286
AFIX  43
H12   2   -0.158927    1.479524    0.687371    11.00000   -1.20000
AFIX   0

C47   1    0.348645    0.468742    0.474454    11.00000    0.03230    0.02856 =
         0.03974   -0.00798    0.01882   -0.00050
AFIX  23
H47A  2    0.385434    0.413374    0.465224    11.00000   -1.20000
H47B  2    0.393624    0.517623    0.462033    11.00000   -1.20000
AFIX   0
C30   1    0.602313    0.801279    0.529789    11.00000    0.01397    0.02472 =
         0.02489   -0.00040   -0.00221    0.00117

C13   1   -0.102625    1.357750    0.672540    11.00000    0.01997    0.02310 =
         0.01449    0.00134   -0.00024   -0.00375
C4    1    0.448513    1.175953    0.628065    11.00000    0.02446    0.02478 =
         0.03223   -0.00787    0.00933   -0.00531
AFIX  43
H4    2    0.486551    1.199821    0.604332    11.00000   -1.20000
AFIX   0

C40   1   -0.038390    0.753090    0.566382    11.00000    0.01443    0.02005 =
         0.04129   -0.00590    0.00124    0.00121
AFIX  23
H40A  2   -0.074515    0.809081    0.575086    11.00000   -1.20000
H40B  2   -0.093759    0.705166    0.573822    11.00000   -1.20000
AFIX   0
C37   1    0.740220    0.665868    0.715401    11.00000    0.02733    0.03133 =
         0.03139   -0.00135   -0.00429    0.00432
AFIX  43
H37   2    0.825780    0.675718    0.718452    11.00000   -1.20000
AFIX   0
C42   1    0.048401    0.642601    0.647552    11.00000    0.02032    0.04039 =
         0.02614   -0.00622    0.00676   -0.00243
AFIX  23
H42A  2    0.041063    0.640933    0.678816    11.00000   -1.20000
H42B  2   -0.028089    0.619569    0.633346    11.00000   -1.20000
AFIX   0

C3    1    0.518262    1.138883    0.661686    11.00000    0.01920    0.02455 =
         0.04375   -0.01229    0.00276    0.00045
AFIX  43
H3    2    0.604730    1.137617    0.661402    11.00000   -1.20000
AFIX   0
C2    1    0.460751    1.103732    0.695674    11.00000    0.02446    0.01987 =
         0.03501   -0.00737   -0.00394    0.00547
AFIX  43
H2    2    0.507036    1.077512    0.718886    11.00000   -1.20000
AFIX   0
C17   1   -0.228167    0.911864    0.713096    11.00000    0.02210    0.03172 =
         0.04839    0.00615    0.01257    0.00181
AFIX  23
H17A  2   -0.227450    0.971719    0.725071    11.00000   -1.20000
H17B  2   -0.287500    0.876458    0.728137    11.00000   -1.20000
AFIX   0

C43   1    0.151098    0.507769    0.655785    11.00000    0.02870    0.03472 =
         0.02299    0.00680    0.00201   -0.00745
AFIX  23
H43A  2    0.078500    0.473769    0.645328    11.00000   -1.20000
H43B  2    0.149730    0.513720    0.687160    11.00000   -1.20000
AFIX   0

C15   1   -0.218183    0.984103    0.602630    11.00000    0.02100    0.03293 =
         0.03249   -0.00316   -0.00787    0.00792
AFIX  23
H15A  2   -0.295549    1.017534    0.600839    11.00000   -1.20000
H15B  2   -0.232112    0.928098    0.587301    11.00000   -1.20000
AFIX   0
C7    1    0.066429    1.209348    0.654519    11.00000    0.02189    0.01503 =
         0.01352   -0.00021    0.00017   -0.00367
AFIX  43
H7    2    0.105523    1.263274    0.649189    11.00000   -1.20000
AFIX   0
C6    1    0.259042    1.144921    0.662983    11.00000    0.02106    0.01285 =
         0.02094   -0.00593    0.00110   -0.00054

C32   1    0.512777    0.697206    0.600308    11.00000    0.01148    0.01797 =
         0.02225   -0.00531    0.00398    0.00087
AFIX  43
H32   2    0.567822    0.743075    0.608379    11.00000   -1.20000
AFIX   0
C26   1    0.397272    0.801501    0.505962    11.00000    0.01430    0.02518 =
         0.01957   -0.00661   -0.00017   -0.00044

C23   1    0.331083    0.890192    0.606243    11.00000    0.02194    0.02112 =
         0.02787   -0.00593    0.00689    0.00100
AFIX  23
H23A  2    0.395023    0.905466    0.586666    11.00000   -1.20000
H23B  2    0.297547    0.832153    0.597946    11.00000   -1.20000
AFIX   0

C39   1   -0.024258    0.753346    0.519317    11.00000    0.01761    0.02082 =
         0.04073    0.00546   -0.00024    0.00083
AFIX  23
H39A  2   -0.102404    0.770113    0.503996    11.00000   -1.20000
H39B  2    0.038564    0.796526    0.512311    11.00000   -1.20000
AFIX   0

C5    1    0.323229    1.177825    0.629426    11.00000    0.02481    0.02052 =
         0.02098   -0.00411    0.00112   -0.00260
C24   1    0.186431    0.962939    0.560892    11.00000    0.02767    0.02898 =
         0.02010   -0.00024    0.00421   -0.00581
AFIX  23
H24A  2    0.159486    0.905268    0.549534    11.00000   -1.20000
H24B  2    0.248791    0.986353    0.542519    11.00000   -1.20000
AFIX   0
C25   1    0.080229    1.023937    0.560803    11.00000    0.03143    0.02116 =
         0.02269    0.00437   -0.00271   -0.00453
AFIX  23
H25A  2    0.103525    1.077844    0.576747    11.00000   -1.20000
H25B  2    0.053530    1.040276    0.531142    11.00000   -1.20000
AFIX   0

C45   1    0.371157    0.409510    0.587825    11.00000    0.02134    0.02242 =
         0.04841    0.00221   -0.00149    0.00573
AFIX  23
H45A  2    0.388781    0.354404    0.603551    11.00000   -1.20000
H45B  2    0.438623    0.450971    0.594965    11.00000   -1.20000
AFIX   0

C14   1   -0.120616    1.035126    0.582686    11.00000    0.03064    0.02439 =
         0.02773    0.00147   -0.00592    0.01097
AFIX  23
H14A  2   -0.149655    1.054221    0.553653    11.00000   -1.20000
H14B  2   -0.099608    1.087700    0.600007    11.00000   -1.20000
AFIX   0
C22   1    0.384458    0.887655    0.651229    11.00000    0.01610    0.02242 =
         0.03236   -0.00746    0.00257    0.00200
AFIX  23
H22A  2    0.452733    0.845320    0.653711    11.00000   -1.20000
H22B  2    0.416620    0.946007    0.659651    11.00000   -1.20000
AFIX   0

C46   1    0.361872    0.392292    0.541060    11.00000    0.02672    0.01806 =
         0.05401   -0.00438    0.00517    0.00431
AFIX  23
H46A  2    0.432352    0.357039    0.532929    11.00000   -1.20000
H46B  2    0.286025    0.359650    0.532975    11.00000   -1.20000
AFIX   0
C50   1    0.020289    0.663897    0.461243    11.00000    0.02149    0.04341 =
         0.02266    0.00713   -0.00096   -0.00147
AFIX  23
H50A  2    0.082977    0.705416    0.452338    11.00000   -1.20000
H50B  2   -0.058772    0.679467    0.446212    11.00000   -1.20000
AFIX   0

C18   1   -0.069553    0.869297    0.762728    11.00000    0.03683    0.03133 =
         0.02455    0.00219    0.01009   -0.00443
AFIX  23
H18A  2   -0.133092    0.841733    0.779261    11.00000   -1.20000
H18B  2   -0.053267    0.928637    0.774288    11.00000   -1.20000
AFIX   0
C21   1    0.338840    0.852324    0.721510    11.00000    0.02419    0.02401 =
         0.02614   -0.00050   -0.00901    0.00532
AFIX  23
H21A  2    0.357096    0.910226    0.734455    11.00000   -1.20000
H21B  2    0.415178    0.817722    0.722638    11.00000   -1.20000
AFIX   0
C19   1    0.044309    0.816063    0.766348    11.00000    0.03712    0.02730 =
         0.02172    0.00671    0.00221   -0.00546
AFIX  23
H19A  2    0.070090    0.806982    0.796832    11.00000   -1.20000
H19B  2    0.028801    0.758120    0.753065    11.00000   -1.20000
AFIX   0
C20   1    0.244698    0.806498    0.745457    11.00000    0.03212    0.02193 =
         0.02461    0.00257   -0.00758    0.00494
AFIX  23
H20A  2    0.224191    0.749672    0.731736    11.00000   -1.20000
H20B  2    0.276851    0.795217    0.775139    11.00000   -1.20000
AFIX   0

C49   1    0.054923    0.572667    0.450096    11.00000    0.02506    0.04360 =
         0.02063   -0.00397   -0.00021   -0.00849
AFIX  23
H49A  2   -0.005285    0.530787    0.460421    11.00000   -1.20000
H49B  2    0.056257    0.566429    0.418733    11.00000   -1.20000
AFIX   0
C48   1    0.217787    0.472185    0.458121    11.00000    0.03612    0.02582 =
         0.02843   -0.01036    0.01240   -0.00811
AFIX  23
H48A  2    0.211016    0.464919    0.426715    11.00000   -1.20000
H48B  2    0.170939    0.424872    0.471045    11.00000   -1.20000
AFIX   0
C36   1    0.672443    0.658042    0.751023    11.00000    0.04437    0.02719 =
         0.02209   -0.00207   -0.00429    0.00615
AFIX  43
H36   2    0.711371    0.663079    0.778831    11.00000   -1.20000
AFIX   0
C44   1    0.264668    0.461803    0.644690    11.00000    0.02892    0.02857 =
         0.02899    0.00741   -0.00707   -0.00292
AFIX  23
H44A  2    0.336809    0.498371    0.652863    11.00000   -1.20000
H44B  2    0.272760    0.405943    0.660525    11.00000   -1.20000
AFIX   0
C41   1    0.069907    0.734622    0.633265    11.00000    0.02528    0.03287 =
         0.03242   -0.01476    0.00422   -0.00347
AFIX  23
H41A  2    0.002288    0.772111    0.641936    11.00000   -1.20000
H41B  2    0.146535    0.756622    0.647810    11.00000   -1.20000
AFIX   0

C16   1   -0.264198    0.914581    0.666494    11.00000    0.01656    0.03110 =
         0.05205    0.00674    0.00153   -0.00289
AFIX  23
H16A  2   -0.263751    0.854789    0.654470    11.00000   -1.20000
H16B  2   -0.347708    0.938629    0.661818    11.00000   -1.20000
AFIX   0
HKLF 4

REM
REM R1 =  0.0321 for   10583 Fo > 4sig(Fo)  and  0.0474 for all   13119 data
REM    685 parameters refined using      0 restraints

END

WGHT      0.0668      0.4259

REM Highest difference peak  0.402,  deepest hole -0.337,  1-sigma level  0.084
Q1    1   0.4830  1.1379  0.6425  11.00000  0.05    0.40
Q2    1   0.4835  1.1057  0.6726  11.00000  0.05    0.38
Q3    1  -0.1786  1.2794  0.6393  11.00000  0.05    0.36
Q4    1   0.3847  1.1726  0.6322  11.00000  0.05    0.35
Q5    1  -0.1649  1.3803  0.6784  11.00000  0.05    0.35
Q6    1  -0.1060  1.3242  0.6566  11.00000  0.05    0.34
Q7    1   0.5477  0.7807  0.5289  11.00000  0.05    0.33
Q8    1   0.4014  1.1003  0.6915  11.00000  0.05    0.32
Q9    1   0.6157  0.8201  0.5071  11.00000  0.05    0.32
Q10   1   0.3019  1.1429  0.6411  11.00000  0.05    0.31
Q11   1   0.6026  0.8372  0.5181  11.00000  0.05    0.31
Q12   1   0.5467  1.1358  0.6600  11.00000  0.05    0.31
Q13   1   0.5750  0.8983  0.4968  11.00000  0.05    0.31
Q14   1  -0.2619  0.8996  0.6920  11.00000  0.05    0.31
Q15   1  -0.3029  1.3816  0.6380  11.00000  0.05    0.31
Q16   1   0.4607  1.1660  0.6170  11.00000  0.05    0.31
Q17   1  -0.2227  0.9448  0.6600  11.00000  0.05    0.30
Q18   1   0.2956  1.1714  0.6506  11.00000  0.05    0.30
Q19   1   0.2983  1.1389  0.6828  11.00000  0.05    0.30
Q20   1  -0.2787  1.3981  0.6254  11.00000  0.05    0.29
;
_shelx_res_checksum               1004
_shelx_hkl_file
;
  -1   0   0   -0.22    0.01
  -1   0   0   -0.22    0.02
  -1   0   0   -0.21    0.01
  -1   0   0   -0.21    0.02
   1   0   0   -0.22    0.02
   1   0   0   -0.20    0.01
   1   0   0   -0.16    0.03
   1   0   0   -0.21    0.01
  -2   0   0  140.94    2.76
  -2   0   0  142.84    2.87
   2   0   0  137.71    2.90
   2   0   0  143.18    2.78
  -3   0   0   -0.15    0.10
  -3   0   0   -0.14    0.11
   3   0   0   -0.11    0.11
   3   0   0    0.08    0.13
  -4   0   0  408.16    7.78
  -4   0   0  399.19    8.15
   4   0   0  412.39    7.82
  -5   0   0    0.07    0.17
  -5   0   0   -0.18    0.15
   5   0   0   -0.03    0.17
   5   0   0   -0.01    0.06
  -6   0   0   72.94    1.73
  -6   0   0   74.29    1.93
   6   0   0   61.06    1.44
   6   0   0   74.21    1.78
  -7   0   0   -0.11    0.15
  -7   0   0    0.21    0.24
   7   0   0   -0.02    0.21
  -8   0   0   61.37    1.91
  -8   0   0   63.06    1.72
   8   0   0   64.17    1.79
  -9   0   0    0.00    0.28
  -9   0   0   -0.17    0.21
   9   0   0   -0.24    0.25
 -10   0   0   31.40    1.24
 -10   0   0   35.82    1.47
  10   0   0   31.39    1.26
 -11   0   0    0.23    0.27
 -11   0   0   -0.36    0.26
  11   0   0   -0.01    0.30
 -12   0   0    8.14    0.90
 -12   0   0    8.53    0.80
  12   0   0    7.74    0.78
 -13   0   0    0.69    0.39
 -13   0   0   -0.11    0.27
  13   0   0   -0.18    0.39
 -14   0   0    0.38    0.41
 -14   0   0   -0.17    0.38
  14   0   0    0.08    0.37
  14   1   0   -0.37    0.38
 -14  -1   0    0.17    0.35
 -14  -1   0    0.20    0.37
  13   1   0   -0.28    0.41
 -13  -1   0    0.04    0.31
  12   1   0    9.75    0.89
 -12  -1   0    9.57    0.75
 -12  -1   0   12.42    1.10
  11   1   0    0.30    0.32
 -11  -1   0    0.12    0.30
 -11  -1   0    0.14    0.34
  10   1   0    0.41    0.35
 -10  -1   0    0.18    0.27
 -10  -1   0   -0.03    0.31
   9   1   0    0.55    0.28
  -9  -1   0    0.13    0.27
  -9  -1   0   -0.47    0.26
   8   1   0    0.76    0.28
  -8  -1   0    1.28    0.29
  -8  -1   0    1.28    0.35
   7   1   0    0.67    0.23
  -7  -1   0    1.35    0.29
  -7  -1   0    0.83    0.27
   6   1   0   29.65    0.98
  -6  -1   0   29.10    0.96
  -6  -1   0   30.67    1.08
   5   1   0   67.14    1.63
  -5  -1   0   64.95    1.73
  -5  -1   0   65.51    1.61
   4   1   0    0.27    0.13
  -4  -1   0    0.43    0.16
  -4  -1   0    0.45    0.16
   3   1   0    2.81    0.21
  -3  -1   0    2.62    0.20
  -3  -1   0    2.47    0.25
   2   1   0  200.66    3.90
   2   1   0  200.18    3.73
  -2  -1   0  195.45    3.71
  -2  -1   0  174.33    3.88
  -1  -1   0   -0.36    0.02
  -1  -1   0   -0.38    0.02
   0   1   0    0.00    0.01
   0   1   0    0.01    0.00
   0   1   0   -0.01    0.01
   0   1   0   -0.01    0.01
   0  -1   0    0.01    0.01
   0  -1   0   -0.01    0.01
   0  -1   0    0.00    0.01
  -1   1   0   -0.38    0.02
   1  -1   0   -0.39    0.02
   1  -1   0   -0.36    0.02
   1  -1   0   -0.38    0.01
  -2   1   0  194.43    3.96
  -2   1   0  199.61    3.93
  -2   1   0  195.43    3.77
   2  -1   0  192.85    3.95
   2  -1   0  201.76    3.78
  -3   1   0    2.26    0.24
  -3   1   0    2.30    0.18
   3  -1   0    2.35    0.19
   3  -1   0    2.33    0.22
   3  -1   0    3.22    0.24
  -4   1   0    0.35    0.15
  -4   1   0    0.03    0.12
   4  -1   0    0.31    0.13
   4  -1   0    0.37    0.14
  -5   1   0   65.73    1.72
  -5   1   0   65.26    1.57
   5  -1   0   66.78    1.61
   5  -1   0   65.37    1.66
  -6   1   0   32.15    1.09
  -6   1   0   30.59    0.95
   6  -1   0   29.67    0.98
  -7   1   0    0.38    0.22
  -7   1   0    0.77    0.26
   7  -1   0    0.70    0.24
  -8   1   0    1.20    0.32
  -8   1   0    1.51    0.29
   8  -1   0    1.03    0.13
   8  -1   0    1.40    0.34
  -9   1   0    0.00    0.25
  -9   1   0    0.48    0.30
   9  -1   0    0.24    0.24
 -10   1   0    0.20    0.28
 -10   1   0   -0.12    0.33
  10  -1   0    0.42    0.34
 -11   1   0    0.09    0.34
 -11   1   0    0.09    0.30
 -11   1   0   -0.28    0.25
  11  -1   0    0.03    0.28
 -12   1   0    8.59    0.79
 -12   1   0    8.43    0.76
 -12   1   0    9.55    1.08
  12  -1   0    9.29    0.85
 -13   1   0    0.51    0.34
 -13   1   0    0.13    0.33
  13  -1   0   -0.20    0.29
 -14   1   0    0.40    0.39
 -14   1   0    0.03    0.35
  14  -1   0    0.02    0.34
  14   2   0    4.60    0.73
 -14  -2   0    5.66    0.75
  13   2   0    0.24    0.37
 -13  -2   0    0.75    0.45
  12   2   0    1.78    0.47
 -12  -2   0    1.92    0.57
 -12  -2   0    2.03    0.47
  11   2   0    4.58    0.59
 -11  -2   0    3.68    0.52
 -11  -2   0    3.72    0.64
  10   2   0    3.90    0.54
 -10  -2   0    3.28    0.54
 -10  -2   0    3.69    0.54
   9   2   0    6.85    0.64
  -9  -2   0    7.21    0.64
  -9  -2   0    8.84    0.69
   8   2   0    2.15    0.38
  -8  -2   0    1.79    0.39
  -8  -2   0    1.68    0.33
   7   2   0    0.55    0.25
  -7  -2   0    0.17    0.19
  -7  -2   0    0.66    0.25
   6   2   0   14.53    0.65
  -6  -2   0   14.14    0.70
  -6  -2   0   14.75    0.64
   5   2   0    9.90    0.50
  -5  -2   0   10.87    0.59
  -5  -2   0   10.52    0.50
   4   2   0  120.10    2.55
  -4  -2   0  117.61    2.43
  -4  -2   0  119.81    2.70
  -4  -2   0  119.81    2.53
   3   2   0    0.57    0.14
  -3  -2   0    0.52    0.13
  -3  -2   0    0.41    0.15
   2   2   0  256.46    4.91
   2   2   0  257.11    5.13
  -2  -2   0  250.33    5.12
  -2  -2   0  261.65    4.89
   1   2   0   47.15    0.97
   1   2   0   41.01    0.95
   1   2   0   47.66    1.03
  -1  -2   0   46.82    0.95
  -1   2   0   47.09    1.02
  -1   2   0   46.93    0.98
  -1   2   0   46.27    0.97
   1  -2   0   46.92    0.96
  -2   2   0  253.06    4.84
  -2   2   0  257.06    4.81
  -2   2   0  243.41    5.03
   2  -2   0  253.88    4.82
   2  -2   0  253.79    5.04
   2  -2   0  259.51    4.85
   2  -2   0  252.65    5.02
  -3   2   0    0.61    0.15
  -3   2   0    0.44    0.12
  -3   2   0    0.58    0.13
   3  -2   0    0.73    0.15
   3  -2   0    0.81    0.14
   3  -2   0    0.28    0.11
  -4   2   0  119.62    2.50
  -4   2   0  117.38    2.46
  -4   2   0  118.73    2.66
   4  -2   0  118.72    2.60
   4  -2   0  118.22    2.50
  -5   2   0   10.10    0.53
  -5   2   0    9.97    0.46
  -5   2   0    9.79    0.46
   5  -2   0   10.53    0.50
   5  -2   0   10.31    0.48
  -6   2   0   13.69    0.58
  -6   2   0   14.98    0.71
  -6   2   0   13.15    0.56
   6  -2   0   14.41    0.61
   6  -2   0   13.21    0.64
  -7   2   0    0.15    0.16
  -7   2   0    0.21    0.16
  -7   2   0    0.00    0.19
   7  -2   0    0.12    0.18
   7  -2   0   -0.05    0.19
  -8   2   0    1.59    0.30
  -8   2   0    2.05    0.39
  -8   2   0    1.98    0.33
   8  -2   0    2.27    0.36
  -9   2   0    7.56    0.57
  -9   2   0    6.92    0.55
  -9   2   0    7.30    0.70
   9  -2   0    7.30    0.57
 -10   2   0    3.44    0.47
 -10   2   0    3.62    0.48
 -10   2   0    3.28    0.57
  10  -2   0    2.65    0.46
 -11   2   0    3.28    0.51
 -11   2   0    3.96    0.66
 -11   2   0    3.28    0.48
  11  -2   0    4.09    0.59
 -12   2   0    2.18    0.47
 -12   2   0    2.45    0.46
  12  -2   0    1.75    0.46
 -13   2   0    1.03    0.41
 -13   2   0    0.57    0.38
  13  -2   0    0.71    0.42
 -14   2   0    4.83    0.69
 -14   2   0    4.47    0.66
  14  -2   0    5.12    0.72
  14   3   0    5.29    0.78
 -14  -3   0    4.15    0.67
  13   3   0    9.65    0.95
 -13  -3   0   10.74    1.11
 -13  -3   0    7.88    0.84
  12   3   0   18.56    1.09
 -12  -3   0   15.61    1.10
 -12  -3   0   18.23    1.03
  11   3   0    0.70    0.37
 -11  -3   0    1.16    0.45
 -11  -3   0    1.24    0.38
  10   3   0    7.98    0.75
 -10  -3   0    8.52    0.85
 -10  -3   0    9.56    0.73
   9   3   0   19.93    0.97
  -9  -3   0   24.23    1.14
  -9  -3   0   23.74    1.01
   8   3   0   13.97    0.75
  -8  -3   0   13.98    0.76
  -8  -3   0   14.37    0.83
   7   3   0   24.36    0.95
  -7  -3   0   24.18    1.02
  -7  -3   0   24.72    0.92
   6   3   0   21.16    0.81
  -6  -3   0   20.32    0.78
  -6  -3   0   21.11    0.88
   5   3   0   15.57    0.64
  -5  -3   0   16.32    0.42
  -5  -3   0   16.05    0.64
  -5  -3   0   17.33    0.74
   4   3   0    2.29    0.27
  -4  -3   0    1.89    0.27
  -4  -3   0    2.16    0.25
   3   3   0    4.82    0.29
  -3  -3   0    5.33    0.33
  -3  -3   0    5.07    0.28
   2   3   0   58.64    1.29
  -2  -3   0   58.80    1.27
  -2  -3   0   58.57    1.25
  -2  -3   0   56.44    1.37
   1   3   0  161.47    3.23
   1   3   0  162.03    3.09
  -1  -3   0  160.76    3.07
  -1  -3   0  151.70    3.23
  -1  -3   0  159.41    3.22
   0   3   0    0.07    0.09
   0   3   0   -0.03    0.08
   0   3   0    0.01    0.09
   0   3   0   -0.12    0.07
   0  -3   0   -0.03    0.07
   0  -3   0    0.03    0.08
   0  -3   0    0.05    0.08
  -1   3   0  162.60    3.08
   1  -3   0  156.86    3.08
   1  -3   0  160.07    3.18
   1  -3   0  164.30    3.05
   1  -3   0  148.86    3.20
  -2   3   0   57.60    1.26
  -2   3   0   57.98    1.25
  -2   3   0   56.81    1.33
   2  -3   0   58.99    1.25
   2  -3   0   58.07    1.33
   2  -3   0   60.65    1.33
  -3   3   0    4.19    0.24
  -3   3   0    5.37    0.26
  -3   3   0    4.75    0.31
   3  -3   0    4.97    0.26
   3  -3   0    5.23    0.30
   3  -3   0    5.10    0.31
  -4   3   0    1.88    0.21
  -4   3   0    1.90    0.21
  -4   3   0    2.34    0.29
   4  -3   0    1.93    0.22
   4  -3   0    1.71    0.22
  -5   3   0   15.85    0.58
  -5   3   0   16.20    0.58
  -5   3   0   16.58    0.70
   5  -3   0   15.39    0.60
   5  -3   0   15.07    0.63
  -6   3   0   22.02    0.86
  -6   3   0   19.50    0.70
  -6   3   0   19.78    0.73
   6  -3   0   18.89    0.78
   6  -3   0   19.81    0.75
  -7   3   0   22.70    0.82
  -7   3   0   22.55    0.96
  -7   3   0   24.20    0.86
   7  -3   0   22.51    0.92
   7  -3   0   23.03    0.87
  -8   3   0   14.70    0.71
  -8   3   0   13.55    0.78
  -8   3   0   13.73    0.68
   8  -3   0   14.29    0.72
   8  -3   0   14.60    0.77
  -9   3   0   23.53    0.96
  -9   3   0   24.16    1.13
  -9   3   0   22.44    0.95
   9  -3   0   22.74    0.98
 -10   3   0    9.29    0.62
 -10   3   0    7.32    0.75
 -10   3   0   10.38    0.68
  10  -3   0    8.36    0.72
 -11   3   0    1.23    0.36
 -11   3   0    0.91    0.39
 -11   3   0    0.53    0.32
  11  -3   0    1.55    0.41
 -12   3   0   19.69    1.01
 -12   3   0   18.25    0.98
  12  -3   0   17.66    1.02
 -13   3   0    9.25    0.84
 -13   3   0    9.01    0.83
  13  -3   0    9.00    0.89
 -14   3   0    4.31    0.67
 -14   3   0    3.87    0.64
  14  -3   0    3.57    0.67
  14   4   0    4.12    0.69
 -14  -4   0    4.32    0.75
  13   4   0    3.68    0.69
 -13  -4   0    4.17    0.79
 -13  -4   0    4.43    0.69
  12   4   0    0.02    0.28
 -12  -4   0   -0.72    0.22
 -12  -4   0    0.43    0.41
  11   4   0   -0.22    0.33
 -11  -4   0    0.90    0.41
 -11  -4   0   -0.20    0.39
  10   4   0    2.57    0.50
 -10  -4   0    3.33    0.51
 -10  -4   0    2.29    0.52
   9   4   0    2.65    0.48
  -9  -4   0    2.65    0.43
  -9  -4   0    2.37    0.47
   8   4   0   63.99    1.87
  -8  -4   0   66.41    1.87
  -8  -4   0   69.18    2.08
   7   4   0   10.04    0.59
  -7  -4   0    9.36    0.64
  -7  -4   0    9.41    0.59
   6   4   0   23.54    0.88
  -6  -4   0   23.14    0.86
  -6  -4   0   23.88    0.96
  -6  -4   0   23.77    0.59
   5   4   0    4.27    0.41
  -5  -4   0    4.91    0.36
  -5  -4   0    4.10    0.42
   4   4   0    6.24    0.38
  -4  -4   0    6.62    0.37
  -4  -4   0    5.89    0.42
   3   4   0  135.51    2.81
  -3  -4   0  135.76    2.97
  -3  -4   0  133.73    2.78
   2   4   0    1.25    0.18
   2   4   0    1.45    0.13
  -2  -4   0    1.47    0.21
  -2  -4   0    1.32    0.16
   1   4   0   40.22    0.93
   1   4   0   39.74    0.92
  -1  -4   0   39.40    0.89
  -1  -4   0   38.39    0.99
   0   4   0  353.42    6.94
   0   4   0  357.07    7.14
   0   4   0  356.29    6.68
   0  -4   0  353.08    6.98
   0  -4   0  350.05    6.65
  -1   4   0   38.53    0.89
  -1   4   0   37.55    0.91
   1  -4   0   37.61    0.86
   1  -4   0   38.65    0.95
   1  -4   0   38.28    0.92
  -2   4   0    1.18    0.16
  -2   4   0    1.43    0.16
   2  -4   0    1.19    0.15
   2  -4   0    1.35    0.17
   2  -4   0    1.16    0.14
  -3   4   0  133.55    2.74
  -3   4   0  131.67    2.89
  -3   4   0  138.67    2.73
   3  -4   0  137.42    2.87
   3  -4   0  133.40    2.73
   3  -4   0  131.31    2.88
  -4   4   0    6.25    0.34
  -4   4   0    6.03    0.41
  -4   4   0    5.79    0.31
   4  -4   0    6.36    0.37
   4  -4   0    6.43    0.36
  -5   4   0    4.53    0.42
  -5   4   0    4.21    0.31
  -5   4   0    4.55    0.32
   5  -4   0    4.14    0.36
   5  -4   0    5.04    0.37
  -6   4   0   23.10    0.80
  -6   4   0   24.26    0.92
  -6   4   0   22.87    0.78
   6  -4   0   24.72    0.85
   6  -4   0   23.10    0.87
  -7   4   0    9.81    0.63
  -7   4   0   10.23    0.54
  -7   4   0    9.91    0.53
   7  -4   0    9.56    0.59
   7  -4   0    9.71    0.55
  -8   4   0   65.73    1.75
  -8   4   0   65.66    1.75
  -8   4   0   64.72    1.95
   8  -4   0   69.24    1.94
   8  -4   0   61.93    1.78
  -9   4   0    2.20    0.38
  -9   4   0    2.14    0.43
  -9   4   0    2.89    0.38
   9  -4   0    2.16    0.42
   9  -4   0    2.30    0.39
 -10   4   0    3.25    0.45
 -10   4   0    2.94    0.54
 -10   4   0    3.09    0.44
  10  -4   0    2.84    0.49
 -11   4   0    0.83    0.31
 -11   4   0    0.55    0.28
  11  -4   0    0.15    0.29
 -12   4   0    0.45    0.33
 -12   4   0   -0.29    0.25
  12  -4   0   -0.27    0.26
 -13   4   0    4.20    0.59
 -13   4   0    3.65    0.55
  13  -4   0    4.11    0.63
 -14   4   0    5.20    0.68
 -14   4   0    5.70    0.72
  14  -4   0    4.46    0.70
  14   5   0    1.47    0.56
 -14  -5   0    0.67    0.48
  13   5   0    1.10    0.50
 -13  -5   0    2.17    0.69
 -13  -5   0    1.38    0.46
  12   5   0    4.39    0.63
 -12  -5   0    3.68    0.59
 -12  -5   0    4.65    0.73
  11   5   0    2.66    0.51
 -11  -5   0    2.61    0.49
 -11  -5   0    1.29    0.56
  10   5   0   16.00    0.93
 -10  -5   0   18.95    1.01
 -10  -5   0   19.14    1.11
   9   5   0   26.78    1.12
  -9  -5   0   25.47    1.23
  -9  -5   0   24.15    1.10
   8   5   0   15.50    0.80
  -8  -5   0   15.99    0.81
  -8  -5   0   14.67    0.88
   7   5   0    4.81    0.50
  -7  -5   0    4.55    0.47
  -7  -5   0    5.08    0.55
  -7  -5   0    4.31    0.22
   6   5   0   20.88    0.84
  -6  -5   0   22.11    0.85
  -6  -5   0   21.24    0.93
   5   5   0   28.78    0.97
  -5  -5   0   31.47    0.97
  -5  -5   0   31.59    1.09
   4   5   0    6.49    0.40
  -4  -5   0    6.19    0.44
  -4  -5   0    6.66    0.38
   3   5   0   11.86    0.49
  -3  -5   0   12.70    0.56
  -3  -5   0   12.07    0.47
   2   5   0  148.35    3.13
   2   5   0  152.29    3.09
  -2  -5   0  155.28    3.27
  -2  -5   0  150.72    3.04
   1   5   0   84.12    1.84
   1   5   0   82.50    1.77
  -1  -5   0   82.74    1.73
  -1  -5   0   82.97    1.89
   0   5   0   -0.11    0.11
   0   5   0   -0.06    0.09
   0   5   0   -0.04    0.10
   0  -5   0    0.03    0.09
   0  -5   0    0.04    0.10
  -1   5   0   81.71    1.93
  -1   5   0   81.64    1.79
  -1   5   0   81.30    1.75
   1  -5   0   83.16    1.71
   1  -5   0   83.25    1.82
   1  -5   0   82.08    1.85
  -2   5   0  145.01    3.03
  -2   5   0  143.12    2.92
   2  -5   0  139.88    3.05
   2  -5   0  146.34    2.89
   2  -5   0  148.35    3.04
  -3   5   0   12.15    0.45
  -3   5   0   12.42    0.51
   3  -5   0   12.43    0.51
   3  -5   0   11.77    0.45
   3  -5   0   12.91    0.51
  -4   5   0    6.91    0.36
  -4   5   0    5.60    0.34
  -4   5   0    5.57    0.39
   4  -5   0    6.74    0.40
   4  -5   0    6.20    0.36
  -5   5   0   32.00    0.93
  -5   5   0   33.08    1.07
  -5   5   0   30.75    0.92
   5  -5   0   30.74    0.94
   5  -5   0   32.11    1.03
  -6   5   0   22.18    0.90
  -6   5   0   21.81    0.77
  -6   5   0   22.20    0.78
   6  -5   0   23.33    0.82
   6  -5   0   20.18    0.83
  -7   5   0    4.11    0.48
  -7   5   0    4.38    0.41
  -7   5   0    4.19    0.40
   7  -5   0    3.55    0.40
   7  -5   0    4.21    0.45
  -8   5   0   16.59    0.75
  -8   5   0   14.51    0.81
  -8   5   0   16.16    0.73
   8  -5   0   15.15    0.83
   8  -5   0   15.59    0.76
  -9   5   0   24.95    0.97
  -9   5   0   24.42    1.14
  -9   5   0   24.70    0.97
   9  -5   0   24.52    1.12
   9  -5   0   22.95    1.00
 -10   5   0   19.42    0.90
 -10   5   0   17.76    0.86
 -10   5   0   17.40    1.02
  10  -5   0   17.20    0.90
  10  -5   0   17.46    0.98
 -11   5   0    2.55    0.45
 -11   5   0    3.45    0.47
  11  -5   0    2.76    0.48
 -12   5   0    3.78    0.55
 -12   5   0    3.90    0.56
  12  -5   0    4.29    0.61
 -13   5   0    1.51    0.43
 -13   5   0    2.18    0.46
  13  -5   0    2.38    0.53
 -14   5   0    1.74    0.49
  14  -5   0    2.28    0.54
  14   6   0    0.39    0.41
 -14  -6   0    0.66    0.50
  13   6   0    0.48    0.48
 -13  -6   0   -0.64    0.39
 -13  -6   0    0.80    0.44
  12   6   0    2.18    0.54
 -12  -6   0    2.19    0.53
 -12  -6   0    1.44    0.58
  11   6   0    4.09    0.62
 -11  -6   0    5.78    0.68
 -11  -6   0    5.64    0.81
  10   6   0    1.14    0.39
 -10  -6   0    0.70    0.40
 -10  -6   0    1.34    0.39
   9   6   0   23.90    1.10
  -9  -6   0   20.98    1.13
  -9  -6   0   23.43    1.06
   8   6   0    0.17    0.28
  -8  -6   0    0.40    0.29
  -8  -6   0    0.33    0.30
   7   6   0   68.81    1.88
  -7  -6   0   69.60    2.06
  -7  -6   0   63.69    1.83
   6   6   0   24.26    0.92
  -6  -6   0   24.46    1.03
  -6  -6   0   22.36    0.88
   5   6   0   65.80    1.72
  -5  -6   0   68.40    1.71
  -5  -6   0   65.34    1.85
   4   6   0    0.06    0.14
  -4  -6   0    0.00    0.20
  -4  -6   0   -0.19    0.12
   3   6   0    6.32    0.37
  -3  -6   0    6.46    0.43
  -3  -6   0    6.97    0.38
   2   6   0   73.14    1.65
   2   6   0   73.23    1.67
  -2  -6   0   73.66    1.63
  -2  -6   0   72.95    1.79
   1   6   0   81.85    1.84
   1   6   0   81.36    1.76
  -1  -6   0   80.71    1.73
  -1  -6   0   78.82    1.90
   0   6   0   27.13    0.77
   0   6   0   27.17    0.82
   0   6   0   26.39    0.74
   0  -6   0   28.71    0.85
   0  -6   0   26.85    0.71
  -1   6   0   79.43    1.94
  -1   6   0   78.93    1.78
   1  -6   0   80.12    1.86
   1  -6   0   79.90    1.81
   1  -6   0   79.46    1.69
  -2   6   0   73.84    1.69
  -2   6   0   72.89    1.63
   2  -6   0   71.94    1.74
   2  -6   0   72.52    1.60
   2  -6   0   73.71    1.71
  -3   6   0    6.63    0.35
  -3   6   0    7.12    0.40
   3  -6   0    6.26    0.34
   3  -6   0    6.51    0.39
   3  -6   0    6.52    0.37
  -4   6   0   -0.03    0.15
  -4   6   0    0.02    0.13
  -4   6   0    0.01    0.13
   4  -6   0   -0.02    0.13
   4  -6   0   -0.23    0.09
  -5   6   0   66.29    1.79
  -5   6   0   68.96    1.64
  -5   6   0   69.03    1.65
   5  -6   0   66.56    1.77
   5  -6   0   66.21    1.64
  -6   6   0   23.45    0.81
  -6   6   0   22.29    0.80
  -6   6   0   25.48    0.97
   6  -6   0   23.10    0.84
   6  -6   0   22.84    0.91
  -7   6   0   70.17    1.77
  -7   6   0   67.84    1.77
  -7   6   0   70.03    1.97
   7  -6   0   68.31    1.95
   7  -6   0   66.62    1.79
  -8   6   0    0.00    0.22
  -8   6   0    0.38    0.25
  -8   6   0    0.04    0.19
   8  -6   0    0.35    0.23
   8  -6   0    0.42    0.25
  -9   6   0   23.74    1.10
  -9   6   0   24.01    0.97
  -9   6   0   23.57    0.96
   9  -6   0   22.96    1.11
   9  -6   0   24.25    1.03
 -10   6   0    1.57    0.36
 -10   6   0    1.29    0.34
  10  -6   0    0.90    0.32
  10  -6   0    1.54    0.42
 -11   6   0    5.38    0.58
 -11   6   0    4.70    0.56
  11  -6   0    5.88    0.74
  11  -6   0    5.60    0.64
 -12   6   0    1.80    0.43
 -12   6   0    2.54    0.45
  12  -6   0    1.83    0.50
 -13   6   0   -0.34    0.32
  13  -6   0    0.05    0.40
  14  -6   0   -0.19    0.34
  13   7   0    0.45    0.40
 -13  -7   0   -0.18    0.50
 -13  -7   0   -0.06    0.38
  12   7   0    1.75    0.49
 -12  -7   0    1.60    0.54
 -12  -7   0    1.47    0.53
  11   7   0   -0.65    0.24
 -11  -7   0    0.07    0.30
 -11  -7   0   -0.33    0.38
  10   7   0    0.83    0.40
 -10  -7   0    0.72    0.47
 -10  -7   0    0.74    0.38
   9   7   0    0.33    0.32
  -9  -7   0    0.44    0.30
  -9  -7   0    0.38    0.37
   8   7   0    3.59    0.52
  -8  -7   0    2.56    0.48
  -8  -7   0    2.04    0.41
   7   7   0    0.07    0.27
  -7  -7   0    0.28    0.33
  -7  -7   0   -0.07    0.24
   6   7   0    0.25    0.20
  -6  -7   0    0.56    0.26
  -6  -7   0    0.05    0.19
   5   7   0    0.02    0.15
  -5  -7   0   -0.02    0.15
  -5  -7   0   -0.05    0.23
   4   7   0   10.60    0.55
  -4  -7   0    9.89    0.50
  -4  -7   0    9.85    0.60
   3   7   0  106.39    2.36
  -3  -7   0  105.67    2.33
  -3  -7   0  105.29    2.53
   2   7   0   43.15    1.11
   2   7   0   45.82    1.17
  -2  -7   0   44.08    1.26
  -2  -7   0   42.83    1.10
   1   7   0   31.61    0.89
   1   7   0   32.73    0.93
   1   7   0   33.13    0.94
  -1  -7   0   34.76    0.89
  -1  -7   0   33.14    1.01
   0   7   0   -0.05    0.14
   0   7   0   -0.09    0.09
   0   7   0    0.13    0.13
   0  -7   0    0.22    0.15
   0  -7   0   -0.01    0.12
  -1   7   0   32.62    1.03
  -1   7   0   31.45    0.89
   1  -7   0   31.40    0.84
   1  -7   0   33.08    0.98
   1  -7   0   32.68    0.94
  -2   7   0   43.64    1.14
  -2   7   0   44.05    1.12
  -2   7   0   43.93    1.31
   2  -7   0   43.81    1.18
   2  -7   0   43.42    1.08
   2  -7   0   43.09    1.21
  -3   7   0  101.23    2.28
  -3   7   0  105.18    2.41
   3  -7   0  102.88    2.44
   3  -7   0  105.78    2.27
   3  -7   0  111.29    2.44
  -4   7   0   10.38    0.46
  -4   7   0   10.21    0.53
   4  -7   0    9.50    0.51
   4  -7   0    9.40    0.45
  -5   7   0    0.28    0.18
  -5   7   0   -0.04    0.14
  -5   7   0    0.06    0.15
   5  -7   0    0.03    0.16
   5  -7   0    0.35    0.19
  -6   7   0    0.26    0.21
  -6   7   0    0.07    0.17
  -6   7   0    0.23    0.18
   6  -7   0    0.11    0.18
   6  -7   0    0.16    0.17
  -7   7   0   -0.21    0.16
  -7   7   0   -0.07    0.23
  -7   7   0   -0.04    0.18
   7  -7   0    0.27    0.22
   7  -7   0    0.23    0.20
  -8   7   0    2.39    0.37
  -8   7   0    1.63    0.39
  -8   7   0    2.34    0.36
   8  -7   0    2.03    0.40
   8  -7   0    2.11    0.36
  -9   7   0    0.55    0.26
  -9   7   0   -0.11    0.23
   9  -7   0    0.66    0.31
   9  -7   0   -0.19    0.21
 -10   7   0    0.13    0.26
 -10   7   0   -0.11    0.24
  10  -7   0    0.95    0.38
  10  -7   0    0.42    0.31
 -11   7   0    0.39    0.29
 -11   7   0    0.47    0.32
  11  -7   0    0.20    0.30
  11  -7   0    0.44    0.36
 -12   7   0    1.00    0.37
 -12   7   0    1.04    0.37
  12  -7   0    0.94    0.44
 -13   7   0   -0.06    0.32
  13  -7   0    0.75    0.39
  13   8   0    1.18    0.50
 -13  -8   0    2.01    0.62
 -13  -8   0    1.98    0.58
  12   8   0    1.75    0.46
 -12  -8   0    2.76    0.64
 -12  -8   0    1.86    0.53
  11   8   0   22.78    1.18
 -11  -8   0   21.58    1.30
 -11  -8   0   23.33    1.20
  10   8   0    2.66    0.53
 -10  -8   0    4.00    0.66
 -10  -8   0    3.50    0.59
   9   8   0    0.11    0.31
  -9  -8   0    0.02    0.32
  -9  -8   0   -0.31    0.30
   8   8   0   11.41    0.72
  -8  -8   0   10.10    0.73
  -8  -8   0   10.80    0.80
   7   8   0    6.79    0.60
  -7  -8   0    5.73    0.59
  -7  -8   0    6.12    0.68
   6   8   0   19.25    0.85
  -6  -8   0   18.39    0.82
  -6  -8   0   20.94    0.97
   5   8   0   51.45    1.48
  -5  -8   0   48.54    1.43
  -5  -8   0   53.58    1.64
   4   8   0   22.27    0.82
  -4  -8   0   19.70    0.75
  -4  -8   0   19.96    0.88
   3   8   0   11.27    0.43
   3   8   0   10.59    0.53
  -3  -8   0   10.97    0.50
  -3  -8   0   11.41    0.62
   2   8   0   33.24    0.98
   2   8   0   33.42    0.95
  -2  -8   0   34.53    0.95
  -2  -8   0   33.92    1.10
   1   8   0  228.95    4.67
   1   8   0  233.44    4.95
   1   8   0  236.76    4.85
  -1  -8   0  235.00    4.64
  -1  -8   0  235.27    4.97
   0   8   0  100.06    2.18
   0   8   0  101.00    2.26
   0   8   0   99.65    2.38
   0  -8   0  100.65    2.16
   0  -8   0   97.56    2.37
  -1   8   0  233.40    4.80
  -1   8   0  235.65    5.07
   1  -8   0  232.39    4.60
   1  -8   0  228.60    4.91
   1  -8   0  233.76    4.86
  -2   8   0   35.07    1.18
  -2   8   0   33.67    0.97
   2  -8   0   33.78    1.02
   2  -8   0   34.01    1.06
   2  -8   0   33.97    0.93
  -3   8   0   10.53    0.48
  -3   8   0    9.63    0.49
   3  -8   0   10.51    0.54
   3  -8   0   10.54    0.47
  -4   8   0   19.56    0.76
  -4   8   0   20.21    0.71
   4  -8   0   19.76    0.70
   4  -8   0   19.56    0.80
  -5   8   0   50.48    1.35
  -5   8   0   51.06    1.49
   5  -8   0   51.02    1.52
   5  -8   0   50.64    1.37
  -6   8   0   17.83    0.73
  -6   8   0   20.50    0.88
   6  -8   0   19.10    0.78
   6  -8   0   19.23    0.86
  -7   8   0    6.25    0.62
  -7   8   0    6.99    0.50
  -7   8   0    6.91    0.48
   7  -8   0    6.41    0.56
   7  -8   0    5.66    0.58
  -8   8   0   10.96    0.74
  -8   8   0   10.08    0.60
  -8   8   0   11.92    0.65
   8  -8   0   11.01    0.76
   8  -8   0   11.79    0.68
  -9   8   0    0.10    0.24
  -9   8   0   -0.04    0.25
   9  -8   0   -0.11    0.29
   9  -8   0    0.01    0.27
 -10   8   0    3.14    0.46
 -10   8   0    3.49    0.46
  10  -8   0    3.68    0.54
  10  -8   0    3.75    0.57
 -11   8   0   23.85    1.07
 -11   8   0   26.40    1.12
  11  -8   0   23.81    1.25
  11  -8   0   24.73    1.18
 -12   8   0    1.98    0.43
  12  -8   0    2.10    0.53
  12  -8   0    0.00    0.36
 -13   8   0    0.62    0.52
 -13   8   0    1.13    0.41
  13  -8   0    1.34    0.52
  13   9   0    5.06    0.75
 -13  -9   0    3.61    0.72
 -13  -9   0    4.34    0.89
  12   9   0   11.54    1.04
 -12  -9   0   10.38    1.11
 -12  -9   0    9.96    0.99
  11   9   0    4.45    0.65
 -11  -9   0    4.48    0.73
 -11  -9   0    4.58    0.68
  10   9   0   15.95    0.99
 -10  -9   0   13.83    0.91
 -10  -9   0   15.75    1.12
   9   9   0    5.63    0.67
  -9  -9   0    4.48    0.66
  -9  -9   0    4.08    0.56
   8   9   0    5.76    0.61
  -8  -9   0    4.81    0.64
  -8  -9   0    3.82    0.54
   7   9   0   29.70    1.18
  -7  -9   0   33.48    1.23
  -7  -9   0   31.48    1.33
   6   9   0    7.64    0.58
  -6  -9   0    7.31    0.54
  -6  -9   0    8.46    0.66
   5   9   0    3.86    0.45
  -5  -9   0    3.25    0.45
  -5  -9   0    3.54    0.42
   4   9   0   13.94    0.67
  -4  -9   0   12.95    0.63
  -4  -9   0   14.75    0.76
   3   9   0   44.80    1.26
   3   9   0   44.16    1.15
  -3  -9   0   44.34    1.39
  -3  -9   0   41.35    1.20
   2   9   0    0.52    0.17
   2   9   0    0.87    0.19
  -2  -9   0    0.70    0.22
  -2  -9   0    0.81    0.19
   1   9   0    1.64    0.25
   1   9   0    2.44    0.29
   1   9   0    2.70    0.30
  -1  -9   0    2.00    0.24
  -1  -9   0    1.98    0.31
   0   9   0   -0.01    0.13
   0   9   0   -0.08    0.14
   0   9   0    0.09    0.14
   0  -9   0    0.38    0.21
   0  -9   0    0.08    0.12
  -1   9   0    2.45    0.28
  -1   9   0    1.85    0.33
  -1   9   0    2.09    0.26
   1  -9   0    1.94    0.25
   1  -9   0    1.90    0.31
  -2   9   0    0.51    0.23
  -2   9   0    0.18    0.15
   2  -9   0    0.26    0.18
   2  -9   0    0.89    0.19
  -3   9   0   42.90    1.23
  -3   9   0   40.92    1.16
  -3   9   0   41.75    1.43
   3  -9   0   43.66    1.31
   3  -9   0   43.87    1.16
  -4   9   0   14.81    0.61
  -4   9   0   14.11    0.67
   4  -9   0   12.99    0.66
   4  -9   0   14.58    0.61
  -5   9   0    3.83    0.42
  -5   9   0    2.97    0.34
   5  -9   0    2.46    0.34
   5  -9   0    3.74    0.44
  -6   9   0    9.12    0.60
  -6   9   0    8.92    0.53
   6  -9   0    8.61    0.53
   6  -9   0    8.48    0.62
  -7   9   0   34.05    1.26
  -7   9   0   33.90    1.10
   7  -9   0   31.60    1.24
   7  -9   0   30.63    1.11
  -8   9   0    5.03    0.51
  -8   9   0    5.08    0.49
   8  -9   0    4.15    0.48
   8  -9   0    3.88    0.53
  -9   9   0    5.27    0.56
  -9   9   0    4.76    0.51
   9  -9   0    5.40    0.58
   9  -9   0    4.45    0.59
 -10   9   0   15.08    0.82
 -10   9   0   13.86    0.76
  10  -9   0   13.12    0.83
  10  -9   0   13.33    0.90
 -11   9   0    4.78    0.56
  11  -9   0    6.05    0.77
  11  -9   0    4.03    0.56
 -12   9   0    8.27    1.09
 -12   9   0   10.70    0.75
  12  -9   0    9.82    0.99
  12  -9   0   10.23    0.92
 -13   9   0    5.26    0.96
 -13   9   0    4.69    0.62
  13  -9   0    4.89    0.70
  13  -9   0    3.91    0.71
  12  10   0    0.65    0.46
 -12 -10   0    1.67    0.57
 -12 -10   0    1.48    0.51
  11  10   0    0.07    0.32
 -11 -10   0    0.06    0.47
 -11 -10   0    0.00    0.34
  10  10   0    6.52    0.75
 -10 -10   0    6.29    0.81
 -10 -10   0    6.84    0.75
   9  10   0    2.37    0.45
  -9 -10   0    2.00    0.53
  -9 -10   0    3.00    0.56
   8  10   0   12.78    0.82
  -8 -10   0   14.60    0.89
  -8 -10   0   14.21    0.99
   7  10   0   13.80    0.81
  -7 -10   0   12.57    0.76
  -7 -10   0   13.45    0.89
   6  10   0    4.44    0.51
  -6 -10   0    4.84    0.52
  -6 -10   0    5.99    0.65
   5  10   0    0.21    0.25
  -5 -10   0   -0.17    0.22
  -5 -10   0    0.19    0.26
   4  10   0    1.09    0.28
  -4 -10   0    2.26    0.40
  -4 -10   0    1.49    0.30
   3  10   0    0.23    0.19
   3  10   0    0.56    0.17
  -3 -10   0    0.66    0.26
  -3 -10   0    0.56    0.19
   2  10   0    8.06    0.48
   2  10   0    8.09    0.45
   2  10   0    8.82    0.48
  -2 -10   0    8.58    0.56
  -2 -10   0    7.75    0.45
   1  10   0    0.06    0.15
   1  10   0   -0.25    0.13
   1  10   0    0.46    0.18
  -1 -10   0    0.35    0.17
  -1 -10   0    0.04    0.16
   0  10   0   68.61    1.84
   0  10   0   67.16    1.65
   0  10   0   68.60    1.71
   0 -10   0   68.41    1.64
   0 -10   0   65.18    1.84
  -1  10   0    0.38    0.23
  -1  10   0   -0.06    0.14
  -1  10   0    0.22    0.15
   1 -10   0    0.23    0.14
   1 -10   0   -0.06    0.17
  -2  10   0    8.31    0.45
  -2  10   0    8.30    0.57
   2 -10   0    8.21    0.44
   2 -10   0    7.22    0.50
  -3  10   0    0.59    0.22
  -3  10   0    0.55    0.28
   3 -10   0    0.44    0.23
   3 -10   0    0.30    0.17
  -4  10   0    2.18    0.34
  -4  10   0    1.97    0.28
  -4  10   0    1.89    0.45
   4 -10   0    1.65    0.29
   4 -10   0    1.75    0.33
  -5  10   0    0.23    0.19
  -5  10   0    0.05    0.21
  -5  10   0    0.20    0.27
   5 -10   0    0.16    0.21
   5 -10   0    0.06    0.18
  -6  10   0    5.42    0.48
  -6  10   0    6.03    0.59
   6 -10   0    5.01    0.49
   6 -10   0    5.58    0.57
  -7  10   0   13.31    0.67
   7 -10   0   13.60    0.83
   7 -10   0   12.92    0.69
  -8  10   0   11.47    0.64
   8 -10   0   11.12    0.69
   8 -10   0   13.01    0.84
  -9  10   0    1.83    0.37
   9 -10   0    1.24    0.34
   9 -10   0    1.39    0.43
 -10  10   0    5.02    0.53
  10 -10   0    5.34    0.61
  10 -10   0    4.52    0.67
 -11  10   0    0.54    0.47
 -11  10   0    0.54    0.32
  11 -10   0    0.02    0.31
  11 -10   0    0.73    0.38
 -12  10   0    0.90    0.59
 -12  10   0    1.24    0.40
  12 -10   0    1.54    0.48
  12 -10   0    0.63    0.40
  12  11   0    6.15    0.81
 -12 -11   0    6.84    0.89
 -12 -11   0    6.98    0.97
  11  11   0    0.09    0.33
 -11 -11   0   -0.71    0.44
 -11 -11   0   -0.81    0.36
  10  11   0    8.22    0.84
 -10 -11   0    8.81    0.92
 -10 -11   0    8.56    0.97
   9  11   0   13.70    0.89
  -9 -11   0   11.98    0.96
  -9 -11   0   12.67    0.87
   8  11   0    0.77    0.37
  -8 -11   0    1.15    0.38
  -8 -11   0    0.46    0.40
   7  11   0    1.50    0.39
  -7 -11   0    0.22    0.28
  -7 -11   0    0.64    0.42
   6  11   0    1.21    0.36
  -6 -11   0    0.97    0.31
  -6 -11   0    1.27    0.46
   5  11   0    5.93    0.55
  -5 -11   0    5.07    0.53
  -5 -11   0    4.56    0.57
   4  11   0    0.05    0.21
  -4 -11   0   -0.11    0.24
  -4 -11   0    0.23    0.20
   3  11   0    1.51    0.31
   3  11   0    1.24    0.23
  -3 -11   0    0.93    0.26
  -3 -11   0    1.66    0.38
   2  11   0    4.73    0.38
   2  11   0    4.63    0.45
   2  11   0    4.63    0.43
  -2 -11   0    4.40    0.50
  -2 -11   0    4.48    0.42
   1  11   0   22.79    0.83
   1  11   0   20.90    0.83
   1  11   0   21.71    0.79
  -1 -11   0   20.33    0.76
  -1 -11   0   19.77    0.91
   0  11   0   -0.29    0.17
   0  11   0    0.21    0.17
   0  11   0    0.02    0.17
   0 -11   0   -0.03    0.21
   0 -11   0   -0.02    0.16
  -1  11   0   21.37    0.77
  -1  11   0   21.40    0.79
  -1  11   0   21.39    0.94
   1 -11   0   21.71    0.77
   1 -11   0   21.39    0.91
  -2  11   0    4.09    0.50
  -2  11   0    4.86    0.37
   2 -11   0    3.21    0.33
   2 -11   0    3.85    0.45
  -3  11   0    1.73    0.30
  -3  11   0    0.98    0.32
   3 -11   0    1.26    0.26
   3 -11   0    1.03    0.27
  -4  11   0   -0.34    0.30
  -4  11   0   -0.25    0.17
   4 -11   0    0.10    0.20
   4 -11   0    0.07    0.24
  -5  11   0    5.40    0.53
  -5  11   0    4.54    0.64
  -5  11   0    5.26    0.46
   5 -11   0    5.06    0.48
   5 -11   0    5.33    0.58
  -6  11   0    1.27    0.30
  -6  11   0    1.77    0.49
   6 -11   0    1.31    0.35
   6 -11   0    1.07    0.28
  -7  11   0    0.88    0.27
  -7  11   0    0.85    0.44
   7 -11   0    0.96    0.29
   7 -11   0    0.93    0.37
  -8  11   0    0.96    0.46
  -8  11   0    1.19    0.32
   8 -11   0    0.75    0.31
   8 -11   0    0.66    0.34
  -9  11   0   12.01    0.69
  -9  11   0   12.13    1.17
   9 -11   0   12.16    0.90
   9 -11   0   11.58    0.74
 -10  11   0    8.47    1.03
 -10  11   0    8.47    0.63
  10 -11   0    8.85    0.88
  10 -11   0    8.07    0.74
 -11  11   0    0.04    0.28
 -11  11   0    0.42    0.59
  11 -11   0    0.08    0.38
  11 -11   0    0.23    0.32
 -12  11   0    5.01    0.59
 -12  11   0    6.78    1.07
  12 -11   0    5.68    0.76
  12 -11   0    5.03    0.78
  11  12   0    0.52    0.41
 -11 -12   0    1.32    0.58
 -11 -12   0    1.18    0.50
  10  12   0    0.59    0.39
 -10 -12   0    1.05    0.49
 -10 -12   0   -0.12    0.44
   9  12   0    3.52    0.58
  -9 -12   0    2.76    0.65
  -9 -12   0    2.81    0.55
   8  12   0    3.37    0.53
  -8 -12   0    3.45    0.66
  -8 -12   0    3.46    0.54
   7  12   0    1.84    0.42
  -7 -12   0    1.06    0.36
  -7 -12   0    1.02    0.47
   6  12   0   31.23    1.21
  -6 -12   0   31.83    1.39
  -6 -12   0   32.51    1.25
   5  12   0   10.70    0.67
  -5 -12   0   12.21    0.88
  -5 -12   0   11.23    0.71
   4  12   0    2.60    0.41
  -4 -12   0    2.38    0.48
  -4 -12   0    2.96    0.42
   3  12   0   12.60    0.67
   3  12   0   13.42    0.68
   3  12   0   12.65    0.59
  -3 -12   0   13.56    0.83
  -3 -12   0   13.41    0.68
   2  12   0    0.32    0.22
   2  12   0    0.51    0.23
   2  12   0    0.16    0.20
  -2 -12   0    0.15    0.19
  -2 -12   0    0.38    0.29
   1  12   0   -0.06    0.17
   1  12   0    0.00    0.16
   1  12   0   -0.27    0.19
  -1 -12   0    0.31    0.21
  -1 -12   0    0.14    0.27
   0  12   0   97.16    2.36
   0  12   0   96.48    2.54
   0  12   0   99.09    2.30
   0 -12   0   96.81    2.29
   0 -12   0   98.04    2.58
  -1  12   0    0.10    0.19
  -1  12   0    0.06    0.18
  -1  12   0    0.01    0.20
   1 -12   0    0.17    0.24
   1 -12   0    0.27    0.18
  -2  12   0    0.23    0.24
  -2  12   0    0.38    0.20
  -2  12   0    0.19    0.18
   2 -12   0    0.18    0.17
   2 -12   0    0.60    0.28
  -3  12   0   12.44    0.82
  -3  12   0   13.21    0.66
   3 -12   0   13.12    0.63
   3 -12   0   11.58    0.70
  -4  12   0    3.80    0.62
   4 -12   0    2.79    0.42
   4 -12   0    2.79    0.38
  -5  12   0   10.48    0.86
   5 -12   0   11.65    0.66
   5 -12   0   12.00    0.74
  -6  12   0   31.84    1.51
  -6  12   0   30.59    1.04
   6 -12   0   30.23    1.26
   6 -12   0   31.83    1.14
  -7  12   0    0.80    0.28
  -7  12   0    1.48    0.54
   7 -12   0    0.73    0.33
   7 -12   0    1.37    0.35
  -8  12   0    3.40    0.44
  -8  12   0    2.00    0.60
   8 -12   0    3.68    0.50
   8 -12   0    4.19    0.60
  -9  12   0    3.03    0.44
  -9  12   0    3.75    0.74
   9 -12   0    2.89    0.55
   9 -12   0    3.23    0.50
 -10  12   0    1.00    0.51
 -10  12   0    0.31    0.30
  10 -12   0    0.19    0.29
  10 -12   0    0.48    0.41
 -11  12   0    0.68    0.33
 -11  12   0    1.07    0.58
  11 -12   0   -0.35    0.33
  11 -12   0    0.90    0.44
 -11 -13   0    0.61    0.52
 -11 -13   0   -0.43    0.38
  10  13   0    0.66    0.41
 -10 -13   0    1.20    0.47
 -10 -13   0    0.36    0.49
   9  13   0    1.62    0.47
  -9 -13   0    0.75    0.48
  -9 -13   0    1.85    0.58
   8  13   0    2.38    0.49
  -8 -13   0    2.01    0.60
  -8 -13   0    2.00    0.49
   7  13   0    2.63    0.50
  -7 -13   0    1.57    0.45
  -7 -13   0    2.70    0.58
   6  13   0    1.76    0.41
  -6 -13   0    1.60    0.39
  -6 -13   0    1.52    0.47
   5  13   0    0.14    0.26
  -5 -13   0   -0.30    0.33
  -5 -13   0    0.00    0.23
   4  13   0    0.56    0.27
  -4 -13   0   -0.10    0.26
  -4 -13   0    0.17    0.30
   3  13   0    1.58    0.28
   3  13   0    1.18    0.31
  -3 -13   0    1.66    0.35
  -3 -13   0    1.51    0.45
   2  13   0    9.34    0.58
   2  13   0    9.32    0.57
  -2 -13   0    8.66    0.68
  -2 -13   0    8.46    0.54
   1  13   0   37.27    1.30
   1  13   0   41.18    1.28
   1  13   0   40.49    1.24
  -1 -13   0   39.04    1.23
  -1 -13   0   39.25    1.44
   0  13   0   -0.09    0.19
   0  13   0   -0.12    0.22
   0  13   0    0.22    0.26
   0 -13   0    0.02    0.22
   0 -13   0    0.52    0.31
  -1  13   0   40.47    1.22
  -1  13   0   40.46    1.47
   1 -13   0   38.58    1.23
   1 -13   0   40.85    1.45
  -2  13   0    9.41    0.54
  -2  13   0    8.44    0.68
   2 -13   0    8.05    0.65
   2 -13   0    8.53    0.53
  -3  13   0    1.03    0.28
  -3  13   0    1.53    0.43
   3 -13   0    0.80    0.27
   3 -13   0    1.36    0.33
  -4  13   0    0.08    0.32
   4 -13   0    0.10    0.23
   4 -13   0    0.38    0.25
  -5  13   0   -0.24    0.30
   5 -13   0   -0.05    0.28
   5 -13   0   -0.03    0.20
  -6  13   0    1.54    0.50
   6 -13   0    2.64    0.48
   6 -13   0    1.57    0.33
  -7  13   0    2.18    0.60
   7 -13   0    2.30    0.51
   7 -13   0    1.11    0.34
  -8  13   0    1.56    0.55
  -8  13   0    1.33    0.31
   8 -13   0    2.06    0.49
   8 -13   0    2.23    0.42
  -9  13   0    1.01    0.57
  -9  13   0    0.65    0.29
   9 -13   0    1.01    0.39
   9 -13   0    1.51    0.51
 -10  13   0    0.34    0.28
 -10  13   0    0.86    0.65
  10 -13   0    0.59    0.43
  10 -13   0    1.05    0.42
 -11  13   0    0.42    0.62
 -11  13   0    0.11    0.28
  11 -13   0   -0.12    0.35
  11 -13   0    0.20    0.43
 -10 -14   0    2.34    0.67
 -10 -14   0    4.33    0.74
  -9 -14   0    0.67    0.42
  -9 -14   0    0.19    0.43
   8  14   0    3.12    0.56
  -8 -14   0    3.02    0.63
  -8 -14   0    0.97    0.46
   7  14   0    1.14    0.38
  -7 -14   0    1.55    0.42
  -7 -14   0    1.44    0.54
   6  14   0    2.21    0.46
  -6 -14   0    2.97    0.56
  -6 -14   0    1.64    0.44
   5  14   0   11.32    0.74
  -5 -14   0   11.79    0.75
  -5 -14   0   13.13    0.97
   4  14   0    0.10    0.25
  -4 -14   0   -0.23    0.32
  -4 -14   0    0.39    0.27
   3  14   0   -0.26    0.23
  -3 -14   0   -0.15    0.28
  -3 -14   0    0.36    0.24
   2  14   0    0.29    0.23
   2  14   0   -0.02    0.21
  -2 -14   0   -0.01    0.20
  -2 -14   0    0.01    0.27
   1  14   0    0.01    0.25
   1  14   0   -0.27    0.20
  -1 -14   0    0.35    0.22
  -1 -14   0   -0.19    0.23
   0  14   0    1.25    0.28
   0  14   0    1.70    0.38
   0 -14   0    0.96    0.26
   0 -14   0    1.51    0.40
  -1  14   0   -0.14    0.19
  -1  14   0    0.42    0.32
   1 -14   0    0.02    0.23
   1 -14   0    0.16    0.25
  -2  14   0    0.11    0.21
  -2  14   0    0.21    0.27
   2 -14   0    0.20    0.25
   2 -14   0   -0.14    0.20
  -3  14   0    0.06    0.35
   3 -14   0   -0.07    0.25
   3 -14   0   -0.19    0.21
  -4  14   0    0.37    0.34
   4 -14   0    0.19    0.23
   4 -14   0    0.45    0.30
  -5  14   0   11.60    0.94
   5 -14   0   12.26    0.69
   5 -14   0   12.63    0.82
  -6  14   0    2.51    0.59
   6 -14   0    2.07    0.42
   6 -14   0    2.09    0.47
  -7  14   0    0.52    0.46
   7 -14   0    0.81    0.43
   7 -14   0    0.57    0.29
  -8  14   0    2.56    0.67
   8 -14   0    2.67    0.53
   8 -14   0    1.92    0.42
  -9  14   0    0.47    0.48
   9 -14   0   -0.66    0.21
   9 -14   0    0.45    0.37
 -10  14   0    2.84    0.77
  10 -14   0    4.48    0.71
  10 -14   0    2.29    0.52
  -9 -15   0    0.65    0.59
  -9 -15   0    1.55    0.55
  -8 -15   0    4.50    0.75
  -8 -15   0    3.22    0.61
  -7 -15   0    1.42    0.56
  -7 -15   0    1.40    0.47
  -6 -15   0   12.23    0.98
  -6 -15   0   12.38    0.87
  -5 -15   0    8.09    0.75
  -5 -15   0    6.67    0.82
  -4 -15   0    1.37    0.38
  -4 -15   0    0.77    0.44
   3  15   0   13.49    0.75
  -3 -15   0   13.65    0.96
  -3 -15   0   12.29    0.75
   2  15   0   -0.08    0.23
   2  15   0    0.12    0.23
  -2 -15   0   -0.17    0.27
  -2 -15   0    0.38    0.28
   1  15   0    1.27    0.34
  -1 -15   0    1.16    0.41
  -1 -15   0    1.37    0.33
   0  15   0    0.19    0.27
   0 -15   0    0.04    0.23
   0 -15   0   -0.05    0.24
  -1  15   0    0.63    0.30
   1 -15   0    0.56    0.36
   1 -15   0    0.62    0.30
  -2  15   0    0.41    0.37
   2 -15   0   -0.43    0.20
   2 -15   0    0.36    0.26
  -3  15   0   14.32    0.99
   3 -15   0   13.53    0.74
   3 -15   0   13.92    0.88
  -4  15   0    1.03    0.42
   4 -15   0    1.63    0.43
   4 -15   0    1.10    0.33
  -5  15   0    8.71    0.96
   5 -15   0    8.14    0.62
   5 -15   0    7.89    0.80
  -6  15   0   11.74    1.15
   6 -15   0   11.76    0.74
   6 -15   0   11.72    0.85
  -7  15   0    1.71    0.56
   7 -15   0    0.70    0.39
   7 -15   0    1.63    0.40
  -8  15   0    6.37    0.98
   8 -15   0    5.29    0.76
   8 -15   0    4.73    0.62
  -9  15   0    1.48    0.62
   9 -15   0    0.90    0.43
   9 -15   0    0.82    0.41
  -9 -16   0    0.67    0.51
  -9 -16   0    0.97    0.55
  -8 -16   0    1.12    0.60
  -8 -16   0    0.13    0.44
  -7 -16   0    1.38    0.51
  -7 -16   0    2.41    0.64
  -6 -16   0    0.51    0.39
  -6 -16   0    0.31    0.46
  -5 -16   0   -0.24    0.35
  -5 -16   0    0.26    0.29
  -4 -16   0    0.22    0.37
  -4 -16   0   -0.15    0.30
  -3 -16   0    0.46    0.30
  -3 -16   0   -0.09    0.35
  -2 -16   0    5.11    0.72
  -2 -16   0    4.03    0.51
   1  16   0    2.92    0.47
  -1 -16   0    2.64    0.54
  -1 -16   0    3.23    0.44
   0  16   0   13.50    0.86
   0 -16   0   12.13    0.72
   0 -16   0   12.98    0.91
  -1  16   0    2.75    0.51
   1 -16   0    2.76    0.51
   1 -16   0    3.13    0.43
  -2  16   0    4.65    0.67
   2 -16   0    4.18    0.61
   2 -16   0    4.54    0.52
  -3  16   0   -0.08    0.36
   3 -16   0    0.50    0.37
   3 -16   0    0.29    0.23
  -4  16   0    0.02    0.36
   4 -16   0    0.62    0.33
   4 -16   0   -0.04    0.26
  -5  16   0   -0.33    0.38
   5 -16   0    0.10    0.24
   5 -16   0    0.19    0.35
  -6  16   0    0.72    0.48
   6 -16   0    0.57    0.42
   6 -16   0    1.33    0.38
  -7  16   0    3.81    0.82
   7 -16   0    2.89    0.58
   7 -16   0    2.30    0.48
  -8  16   0    1.22    0.56
   8 -16   0    0.95    0.43
   8 -16   0    0.19    0.35
   9 -16   0    0.47    0.45
   9 -16   0   -0.16    0.36
  -8 -17   0    0.19    0.45
  -8 -17   0    0.37    0.39
  -7 -17   0    2.99    0.61
  -7 -17   0    2.10    0.69
  -6 -17   0    7.76    0.81
  -6 -17   0    5.98    0.88
  -5 -17   0    0.76    0.51
  -5 -17   0    0.78    0.40
  -4 -17   0    0.16    0.36
  -4 -17   0    1.05    0.47
  -3 -17   0    1.38    0.50
  -3 -17   0    0.64    0.32
  -2 -17   0   11.16    0.91
  -2 -17   0   12.94    0.80
  -1 -17   0   26.10    1.12
  -1 -17   0   29.44    1.42
   0  17   0    0.21    0.31
   0 -17   0    0.11    0.29
   0 -17   0   -0.37    0.24
  -1  17   0   27.75    1.32
   1 -17   0   26.27    1.32
   1 -17   0   26.14    1.09
  -2  17   0   11.07    0.91
   2 -17   0   10.81    0.83
   2 -17   0   13.03    0.78
  -3  17   0    2.33    0.55
   3 -17   0    1.05    0.36
   3 -17   0    2.53    0.55
  -4  17   0    0.73    0.47
   4 -17   0    0.49    0.39
   4 -17   0    0.12    0.32
  -5  17   0    0.69    0.45
   5 -17   0    1.01    0.37
   5 -17   0    0.81    0.44
  -6  17   0    6.15    0.93
   6 -17   0    6.73    0.69
   6 -17   0    5.69    0.75
  -7  17   0    1.71    0.70
   7 -17   0    2.57    0.47
   7 -17   0    1.57    0.52
   8 -17   0    0.94    0.38
   8 -17   0    0.38    0.37
  -6 -18   0    0.19    0.44
  -6 -18   0    0.80    0.57
  -5 -18   0    0.41    0.44
  -5 -18   0    0.40    0.36
  -4 -18   0    2.05    0.59
  -4 -18   0    2.47    0.53
  -3 -18   0    2.93    0.65
  -3 -18   0    3.46    0.55
  -2 -18   0   28.18    1.24
  -2 -18   0   32.09    1.54
  -1 -18   0   12.38    1.01
  -1 -18   0   14.71    0.87
   0 -18   0   21.44    1.03
   0 -18   0   19.84    1.23
  -1  18   0   11.95    0.93
   1 -18   0   14.75    1.06
   1 -18   0   12.71    0.81
  -2  18   0   27.18    1.41
   2 -18   0   26.85    1.37
   2 -18   0   27.91    1.19
  -3  18   0    4.05    0.71
   3 -18   0    5.00    0.60
   3 -18   0    3.35    0.65
  -4  18   0    3.80    0.76
   4 -18   0    2.76    0.48
   4 -18   0    2.96    0.62
  -5  18   0    0.36    0.47
   5 -18   0    0.54    0.43
   5 -18   0    0.66    0.39
  -6  18   0   -0.02    0.48
   6 -18   0    0.89    0.41
   6 -18   0    0.97    0.49
  -5 -19   0   -0.13    0.31
  -5 -19   0   -0.31    0.39
  -4 -19   0    8.06    1.00
  -4 -19   0    6.40    0.78
  -3 -19   0    0.28    0.37
  -3 -19   0    0.26    0.49
  -2 -19   0    3.14    0.54
  -2 -19   0    1.86    0.55
  -1 -19   0    2.62    0.51
  -1 -19   0    2.86    0.64
   0 -19   0    0.50    0.35
   0 -19   0    0.01    0.40
   1 -19   0    2.08    0.57
   1 -19   0    3.09    0.50
  -2  19   0    2.85    0.65
   2 -19   0    3.67    0.70
   2 -19   0    2.47    0.49
  -3  19   0    0.58    0.43
   3 -19   0    0.22    0.36
   3 -19   0    0.19    0.39
  -4  19   0    7.39    1.01
   4 -19   0    7.50    0.90
   4 -19   0    7.40    0.75
  -5  19   0    0.35    0.51
   5 -19   0   -0.45    0.31
   5 -19   0   -0.12    0.33
  -3 -20   0    0.66    0.42
  -2 -20   0    0.05    0.37
  -2 -20   0    0.68    0.51
  -1 -20   0    5.01    0.69
  -1 -20   0    5.92    0.86
   0 -20   0    2.46    0.64
   0 -20   0    1.91    0.46
   1 -20   0    5.46    0.69
   1 -20   0    4.84    0.78
   2 -20   0   -0.37    0.34
   2 -20   0    0.31    0.45
   3 -20   0   -0.19    0.34
   3 -20   1   -0.02    0.33
   2 -20   1    0.55    0.39
   2 -20   1    0.28    0.45
   1 -20   1    6.32    0.88
   1 -20   1    5.17    0.68
   0 -20   1    8.01    0.95
   0 -20   1    7.78    0.83
  -1 -20   1    1.00    0.46
  -1 -20   1    0.73    0.52
  -2 -20   1    6.49    0.73
  -2 -20   1    7.02    0.93
  -3 -20   1    2.15    0.51
   5 -19   1    2.22    0.52
   5 -19   1    2.03    0.60
  -5  19  -1    1.06    0.53
   4 -19   1    1.26    0.47
   4 -19   1    2.02    0.46
  -4  19  -1    3.55    0.78
   3 -19   1    0.67    0.39
   3 -19   1    0.76    0.46
  -3  19  -1    0.50    0.46
   2 -19   1    3.47    0.53
   2 -19   1    5.32    0.80
  -2  19  -1    4.09    0.71
   1 -19   1    0.60    0.36
   1 -19   1   -0.08    0.40
   0 -19   1    4.98    0.76
   0 -19   1    4.52    0.61
  -1 -19   1    1.61    0.55
  -1 -19   1    1.18    0.41
  -2 -19   1    0.25    0.47
  -2 -19   1   -0.32    0.30
  -3 -19   1    7.66    0.77
  -3 -19   1    5.17    0.80
  -4 -19   1    0.79    0.51
  -4 -19   1    0.27    0.37
  -5 -19   1    0.56    0.39
  -5 -19   1    0.17    0.45
   6 -18   1    0.38    0.37
   6 -18   1    0.44    0.46
  -6  18  -1    0.08    0.46
   5 -18   1    0.07    0.32
   5 -18   1   -0.21    0.38
  -5  18  -1   -0.23    0.40
   4 -18   1    1.23    0.41
   4 -18   1    1.74    0.53
  -4  18  -1    1.11    0.57
   3 -18   1    0.19    0.26
   3 -18   1    0.05    0.36
  -3  18  -1    0.56    0.46
   2 -18   1    0.72    0.44
   2 -18   1    0.69    0.35
  -2  18  -1    0.56    0.42
   1 -18   1    0.06    0.29
   1 -18   1    0.58    0.44
  -1  18  -1    0.77    0.43
   0 -18   1    0.30    0.31
   0 -18   1    0.13    0.37
  -1 -18   1    0.14    0.41
  -1 -18   1   -0.39    0.27
  -2 -18   1    1.31    0.52
  -2 -18   1    2.01    0.45
  -3 -18   1   -0.01    0.27
  -3 -18   1    0.16    0.43
  -4 -18   1    8.78    0.83
  -4 -18   1    8.13    0.97
  -5 -18   1    2.77    0.57
  -5 -18   1    2.49    0.66
  -6 -18   1    4.77    0.88
  -6 -18   1    6.19    0.79
   8 -17   1    4.13    0.61
   8 -17   1    3.96    0.71
   7 -17   1    1.35    0.40
   7 -17   1    0.75    0.45
  -7  17  -1    0.78    0.56
   6 -17   1    7.00    0.85
   6 -17   1    5.99    0.66
  -6  17  -1    5.48    0.87
   5 -17   1    1.65    0.40
   5 -17   1    1.95    0.49
  -5  17  -1    1.58    0.57
   4 -17   1    0.45    0.29
   4 -17   1    0.74    0.43
  -4  17  -1    0.05    0.43
   3 -17   1    0.05    0.35
   3 -17   1    0.43    0.27
  -3  17  -1    0.21    0.36
   2 -17   1    7.10    0.66
   2 -17   1    7.28    0.80
  -2  17  -1    8.35    0.89
   1 -17   1    8.64    0.91
   1 -17   1   10.60    0.71
  -1  17  -1   11.17    0.83
   0 -17   1    4.81    0.55
   0 -17   1    4.96    0.73
   0  17  -1    4.68    0.63
  -1 -17   1    0.46    0.42
  -1 -17   1    0.59    0.33
  -2 -17   1    0.52    0.30
  -2 -17   1    0.09    0.31
  -3 -17   1    3.77    0.71
  -3 -17   1    4.72    0.59
  -4 -17   1    8.55    0.97
  -4 -17   1    9.86    0.85
  -5 -17   1    0.33    0.37
  -5 -17   1    1.46    0.58
  -6 -17   1   17.38    1.23
  -6 -17   1   17.92    1.06
  -7 -17   1    2.76    0.75
  -7 -17   1    2.78    0.62
  -8 -17   1    0.07    0.39
  -8 -17   1    0.47    0.49
   9 -16   1    4.77    0.78
   9 -16   1    5.60    0.71
   8 -16   1   -0.10    0.33
   8 -16   1    0.62    0.42
  -8  16  -1    1.15    0.56
   7 -16   1    2.56    0.56
   7 -16   1    3.15    0.54
  -7  16  -1    3.17    0.79
   6 -16   1    2.32    0.55
   6 -16   1    2.11    0.42
  -6  16  -1    2.00    0.66
   5 -16   1    0.63    0.30
   5 -16   1    0.74    0.36
  -5  16  -1    1.66    0.58
   4 -16   1    1.85    0.39
   4 -16   1    3.32    0.58
  -4  16  -1    3.26    0.66
   3 -16   1    5.78    0.72
   3 -16   1    6.21    0.62
  -3  16  -1    6.67    0.79
   2 -16   1   11.11    0.81
   2 -16   1   10.90    0.67
  -2  16  -1   11.81    0.89
   1 -16   1    7.74    0.78
   1 -16   1    8.53    0.61
  -1  16  -1    8.93    0.84
   0 -16   1    0.04    0.34
   0 -16   1    0.26    0.26
   0  16  -1    0.55    0.31
  -1 -16   1    0.25    0.27
  -1 -16   1    0.26    0.35
   1  16  -1    0.48    0.30
  -2 -16   1    4.98    0.55
  -2 -16   1    5.44    0.73
  -3 -16   1   12.73    0.98
  -3 -16   1   11.53    0.74
  -4 -16   1    0.86    0.33
  -4 -16   1    0.90    0.43
  -5 -16   1    0.67    0.49
  -5 -16   1   -0.41    0.29
  -6 -16   1   -0.72    0.30
  -6 -16   1   -0.37    0.35
  -7 -16   1    0.05    0.39
  -7 -16   1    0.45    0.45
  -8 -16   1    1.12    0.65
  -8 -16   1    1.81    0.53
  -9 -16   1    0.25    0.46
  -9 -16   1   -0.51    0.42
   9 -15   1    2.30    0.52
   9 -15   1    2.47    0.57
  -9  15  -1    2.04    0.72
   8 -15   1    1.35    0.51
   8 -15   1    0.36    0.37
  -8  15  -1    0.61    0.49
   7 -15   1   14.31    0.98
   7 -15   1   16.05    0.90
  -7  15  -1   14.01    1.15
   6 -15   1    0.72    0.33
   6 -15   1    0.52    0.39
  -6  15  -1    1.77    0.53
   5 -15   1    1.36    0.40
   5 -15   1    1.63    0.37
  -5  15  -1    0.11    0.45
   4 -15   1    0.09    0.31
   4 -15   1    0.00    0.24
  -4  15  -1    0.65    0.46
   3 -15   1    0.49    0.35
   3 -15   1    0.28    0.24
  -3  15  -1    0.43    0.31
   2 -15   1   10.31    0.79
   2 -15   1   10.00    0.62
  -2  15  -1   11.14    0.81
   1 -15   1   30.69    1.14
   1 -15   1   34.75    1.42
  -1  15  -1   32.66    1.37
   0 -15   1    0.09    0.27
   0 -15   1    0.17    0.25
   0  15  -1    0.33    0.31
   0  15  -1    0.42    0.26
  -1 -15   1    0.70    0.30
  -1 -15   1    0.91    0.39
   1  15  -1    0.49    0.27
   1  15  -1    0.47    0.29
  -2 -15   1    1.87    0.35
  -2 -15   1    3.21    0.55
   2  15  -1    2.70    0.39
   2  15  -1    3.17    0.46
  -3 -15   1    3.79    0.61
  -3 -15   1    2.93    0.44
   3  15  -1    3.59    0.49
  -4 -15   1   10.45    0.74
  -4 -15   1   13.18    0.96
   4  15  -1   10.55    0.75
  -5 -15   1    1.99    0.45
  -5 -15   1    2.66    0.54
   5  15  -1    1.81    0.41
  -6 -15   1   17.60    1.00
  -6 -15   1   14.59    1.05
   6  15  -1   15.93    0.94
  -7 -15   1    0.82    0.45
  -7 -15   1   -0.01    0.37
  -8 -15   1   32.13    1.47
  -8 -15   1   34.19    1.70
  -9 -15   1    1.76    0.66
  -9 -15   1    2.16    0.58
  10 -14   1   -0.21    0.34
  10 -14   1    0.24    0.35
 -10  14  -1    0.19    0.26
 -10  14  -1   -0.17    0.48
   9 -14   1   14.71    1.06
   9 -14   1   13.32    0.89
  -9  14  -1   14.04    0.75
  -9  14  -1   12.96    1.33
   8 -14   1    0.26    0.32
   8 -14   1    0.56    0.35
  -8  14  -1    0.12    0.45
   7 -14   1   15.50    0.87
   7 -14   1   14.51    0.99
  -7  14  -1   16.91    1.21
   6 -14   1    3.07    0.47
   6 -14   1    3.44    0.60
  -6  14  -1    3.46    0.67
   5 -14   1    4.27    0.60
   5 -14   1    4.34    0.50
  -5  14  -1    3.53    0.64
   4 -14   1    0.10    0.22
   4 -14   1   -0.24    0.26
  -4  14  -1   -0.19    0.34
   3 -14   1    3.41    0.44
   3 -14   1    3.36    0.53
  -3  14  -1    3.48    0.59
  -3  14  -1    3.44    0.42
   2 -14   1   -0.01    0.27
   2 -14   1    0.29    0.22
  -2  14  -1    0.11    0.24
  -2  14  -1   -0.09    0.22
   1 -14   1    0.96    0.29
   1 -14   1    0.96    0.35
  -1  14  -1    1.35    0.39
  -1  14  -1    1.63    0.33
   0 -14   1    1.15    0.37
   0 -14   1    2.05    0.34
   0  14  -1    2.18    0.43
   0  14  -1    2.26    0.35
  -1 -14   1   16.87    1.00
  -1 -14   1   18.38    0.83
   1  14  -1   18.53    0.83
   1  14  -1   19.30    0.89
  -2 -14   1   16.42    0.81
  -2 -14   1   18.16    1.04
   2  14  -1   17.57    0.84
   2  14  -1   17.05    0.79
  -3 -14   1   21.09    1.14
  -3 -14   1   22.61    0.97
   3  14  -1   22.33    0.96
  -4 -14   1    9.37    0.67
  -4 -14   1    9.32    0.88
   4  14  -1    7.71    0.68
  -5 -14   1   29.97    1.44
  -5 -14   1   28.63    1.19
   5  14  -1   32.70    1.25
  -6 -14   1    2.07    0.56
  -6 -14   1    3.75    0.55
   6  14  -1    2.68    0.45
  -7 -14   1    7.27    0.74
  -7 -14   1    6.86    0.84
   7  14  -1    5.52    0.64
  -8 -14   1    4.69    0.81
  -8 -14   1    5.11    0.71
   8  14  -1    5.86    0.70
  -9 -14   1    1.14    0.52
  -9 -14   1    0.40    0.38
   9  14  -1    1.12    0.45
 -10 -14   1    4.40    0.87
 -10 -14   1    4.98    0.77
  11 -13   1    2.84    0.56
  11 -13   1    2.65    0.58
 -11  13  -1    3.17    0.80
 -11  13  -1    2.48    0.47
  10 -13   1   10.51    1.03
  10 -13   1    8.32    0.80
 -10  13  -1    9.31    0.65
 -10  13  -1    9.72    1.17
   9 -13   1    0.72    0.39
   9 -13   1    0.49    0.32
  -9  13  -1    0.95    0.33
  -9  13  -1    1.21    0.56
   8 -13   1    5.50    0.70
   8 -13   1    5.00    0.59
  -8  13  -1    5.22    0.53
  -8  13  -1    5.01    0.83
   7 -13   1    3.19    0.58
   7 -13   1    1.87    0.41
  -7  13  -1    1.97    0.57
  -7  13  -1    1.75    0.35
   6 -13   1   13.24    0.85
   6 -13   1   12.93    0.74
  -6  13  -1   12.49    0.98
   5 -13   1    0.43    0.28
   5 -13   1    1.13    0.31
  -5  13  -1    0.39    0.38
   4 -13   1   41.81    1.50
   4 -13   1   43.11    1.34
  -4  13  -1   41.28    1.70
   3 -13   1   -0.17    0.23
   3 -13   1   -0.34    0.19
  -3  13  -1   -0.37    0.24
   2 -13   1    5.54    0.51
   2 -13   1    5.46    0.61
  -2  13  -1    5.60    0.50
  -2  13  -1    5.54    0.62
   1 -13   1    6.18    0.65
   1 -13   1    6.46    0.50
  -1  13  -1    7.68    0.70
  -1  13  -1    6.97    0.49
  -1  13  -1    6.80    0.51
   0 -13   1    1.74    0.33
   0 -13   1    1.61    0.41
   0  13  -1    1.49    0.31
   0  13  -1    1.96    0.34
   0  13  -1    2.04    0.38
  -1 -13   1   85.22    2.40
  -1 -13   1   80.33    2.07
   1  13  -1   81.11    2.22
   1  13  -1   81.74    2.13
   1  13  -1   82.48    2.09
  -2 -13   1   33.79    1.38
  -2 -13   1   33.18    1.14
   2  13  -1   33.74    1.14
   2  13  -1   32.93    1.17
   2  13  -1   35.57    1.18
  -3 -13   1    4.21    0.46
  -3 -13   1    4.33    0.60
   3  13  -1    3.97    0.48
   3  13  -1    4.18    0.50
   3  13  -1    4.18    0.40
  -4 -13   1   10.73    0.83
  -4 -13   1    9.96    0.66
   4  13  -1   10.58    0.67
  -5 -13   1    5.96    0.75
  -5 -13   1    5.69    0.58
   5  13  -1    5.69    0.60
  -6 -13   1    7.77    0.82
  -6 -13   1    6.18    0.64
   6  13  -1    6.75    0.67
  -7 -13   1   14.90    0.92
  -7 -13   1   14.22    1.05
   7  13  -1   14.10    0.88
  -8 -13   1   24.39    1.34
  -8 -13   1   23.22    1.16
   8  13  -1   22.12    1.14
  -9 -13   1    0.82    0.44
  -9 -13   1    1.33    0.58
   9  13  -1    1.52    0.42
 -10 -13   1    0.24    0.46
 -10 -13   1   -0.28    0.34
  10  13  -1    0.51    0.39
 -11 -13   1    0.25    0.59
 -11 -13   1    0.89    0.52
  11  13  -1    0.80    0.50
  11 -12   1    2.76    0.65
  11 -12   1    2.64    0.51
 -11  12  -1    1.76    0.42
 -11  12  -1    2.57    0.75
  10 -12   1    5.54    0.67
  10 -12   1    5.52    0.74
 -10  12  -1    5.69    0.60
 -10  12  -1    6.29    0.94
   9 -12   1    0.64    0.32
   9 -12   1    0.87    0.40
  -9  12  -1    0.71    0.33
  -9  12  -1    0.76    0.48
   8 -12   1   -0.25    0.27
   8 -12   1   -0.02    0.28
  -8  12  -1    0.12    0.38
  -8  12  -1   -0.01    0.23
   7 -12   1    3.21    0.46
   7 -12   1    4.56    0.58
  -7  12  -1    4.19    0.47
  -7  12  -1    4.40    0.73
   6 -12   1    0.25    0.27
   6 -12   1   -0.18    0.27
  -6  12  -1    0.05    0.22
  -6  12  -1    0.03    0.39
   5 -12   1   10.37    0.73
   5 -12   1   10.66    0.63
  -5  12  -1    9.80    0.93
  -5  12  -1    9.31    0.57
   4 -12   1   22.51    1.01
   4 -12   1   23.71    0.90
  -4  12  -1   23.47    1.18
   3 -12   1   -0.29    0.23
   3 -12   1    0.36    0.20
  -3  12  -1   -0.08    0.18
  -3  12  -1   -0.01    0.30
   2 -12   1    6.00    0.43
   2 -12   1    5.87    0.59
  -2  12  -1    5.56    0.43
  -2  12  -1    5.54    0.43
  -2  12  -1    6.46    0.66
   1 -12   1   39.77    1.39
   1 -12   1   40.15    1.19
  -1  12  -1   39.47    1.40
  -1  12  -1   38.74    1.18
  -1  12  -1   37.97    1.20
   0 -12   1    0.00    0.19
   0 -12   1    0.05    0.26
   0  12  -1    0.08    0.18
   0  12  -1    0.30    0.21
   0  12  -1    0.27    0.23
  -1 -12   1    1.63    0.38
  -1 -12   1    2.91    0.36
   1  12  -1    2.52    0.35
   1  12  -1    2.27    0.34
   1  12  -1    2.71    0.37
  -2 -12   1    1.91    0.32
  -2 -12   1    1.64    0.37
   2  12  -1    2.64    0.34
   2  12  -1    2.28    0.35
   2  12  -1    2.95    0.39
  -3 -12   1   29.84    1.22
  -3 -12   1   25.12    0.96
   3  12  -1   28.22    1.04
   3  12  -1   27.93    0.90
   3  12  -1   26.62    1.01
  -4 -12   1    6.26    0.57
  -4 -12   1    6.46    0.69
   4  12  -1    7.18    0.62
  -5 -12   1   12.17    0.87
  -5 -12   1   10.81    0.70
   5  12  -1   10.61    0.70
  -6 -12   1   17.58    0.91
  -6 -12   1   21.33    1.11
   6  12  -1   18.54    0.94
  -7 -12   1   23.41    1.09
  -7 -12   1   23.60    1.27
   7  12  -1   23.35    1.10
  -8 -12   1    0.98    0.39
  -8 -12   1    1.13    0.45
   8  12  -1    0.62    0.36
  -9 -12   1   -0.26    0.29
  -9 -12   1    0.43    0.44
   9  12  -1   -0.01    0.27
 -10 -12   1    1.18    0.51
 -10 -12   1    1.81    0.52
  10  12  -1    0.89    0.46
 -11 -12   1    7.79    1.01
 -11 -12   1    7.88    0.93
  11  12  -1    6.92    0.86
  12 -11   1    1.14    0.49
  12 -11   1    0.98    0.44
 -12  11  -1    0.60    0.53
 -12  11  -1    0.13    0.35
  11 -11   1    0.70    0.38
  11 -11   1    1.12    0.38
 -11  11  -1    0.61    0.34
 -11  11  -1   -0.01    0.48
  10 -11   1    1.50    0.39
  10 -11   1    1.89    0.53
 -10  11  -1    1.63    0.40
 -10  11  -1    0.89    0.50
   9 -11   1   -0.31    0.29
   9 -11   1    0.32    0.29
  -9  11  -1    0.05    0.25
   8 -11   1    1.37    0.39
   8 -11   1    1.16    0.36
  -8  11  -1    2.05    0.38
   7 -11   1   11.60    0.80
   7 -11   1   10.00    0.64
  -7  11  -1   10.84    0.63
   6 -11   1    0.09    0.21
   6 -11   1    0.17    0.29
  -6  11  -1   -0.27    0.27
  -6  11  -1   -0.05    0.22
   5 -11   1   27.21    1.11
   5 -11   1   26.59    0.98
  -5  11  -1   28.51    0.98
  -5  11  -1   26.01    1.26
  -5  11  -1   26.87    1.07
   4 -11   1    3.05    0.38
   4 -11   1    2.88    0.43
  -4  11  -1    3.22    0.38
  -4  11  -1    3.13    0.41
  -4  11  -1    2.76    0.50
   3 -11   1   30.73    1.13
   3 -11   1   29.15    0.97
  -3  11  -1   30.40    1.24
  -3  11  -1   28.99    1.02
   2 -11   1   30.56    1.12
   2 -11   1   29.93    0.97
  -2  11  -1   30.76    1.19
  -2  11  -1   29.06    0.98
   1 -11   1   10.59    0.52
   1 -11   1    9.40    0.60
  -1  11  -1   11.40    0.56
  -1  11  -1   10.48    0.53
  -1  11  -1   11.23    0.65
   0 -11   1   20.37    0.90
   0 -11   1   19.52    0.73
   0  11  -1   19.31    0.74
   0  11  -1   18.97    0.76
   0  11  -1   18.49    0.82
  -1 -11   1    0.21    0.22
  -1 -11   1    0.17    0.18
   1  11  -1    0.25    0.19
   1  11  -1    0.03    0.17
   1  11  -1    0.15    0.17
  -2 -11   1    2.87    0.34
  -2 -11   1    2.59    0.42
   2  11  -1    3.36    0.36
   2  11  -1    3.26    0.39
   2  11  -1    2.77    0.36
  -3 -11   1    4.10    0.42
  -3 -11   1    3.75    0.50
   3  11  -1    3.77    0.30
   3  11  -1    3.98    0.43
  -4 -11   1    0.04    0.24
  -4 -11   1   -0.14    0.18
   4  11  -1   -0.16    0.21
  -5 -11   1    2.34    0.41
  -5 -11   1    3.71    0.56
   5  11  -1    2.62    0.42
  -6 -11   1    1.52    0.46
  -6 -11   1    2.02    0.41
   6  11  -1    1.54    0.35
  -7 -11   1    8.46    0.87
  -7 -11   1    7.50    0.71
   7  11  -1    8.72    0.75
  -8 -11   1    1.70    0.46
  -8 -11   1    1.51    0.52
   8  11  -1    1.02    0.34
  -9 -11   1   10.12    1.03
  -9 -11   1    9.01    0.84
   9  11  -1   10.70    0.81
 -10 -11   1    0.44    0.53
 -10 -11   1    0.16    0.40
  10  11  -1    0.38    0.35
 -11 -11   1    7.99    0.98
 -11 -11   1    7.89    0.91
  11  11  -1    8.17    0.89
 -12 -11   1    2.18    0.71
 -12 -11   1    2.13    0.61
  12  11  -1    1.05    0.50
  12 -10   1    3.56    0.61
  12 -10   1    2.70    0.63
 -12  10  -1    2.78    0.50
 -12  10  -1    2.98    0.79
  11 -10   1    4.38    0.63
  11 -10   1    5.38    0.76
 -11  10  -1    4.53    0.56
  10 -10   1   -0.01    0.31
  10 -10   1   -0.16    0.29
 -10  10  -1    0.39    0.29
   9 -10   1    0.32    0.31
   9 -10   1    0.35    0.33
  -9  10  -1    1.33    0.34
   8 -10   1    0.50    0.30
   8 -10   1    0.52    0.26
  -8  10  -1    0.11    0.25
   7 -10   1   17.70    0.84
   7 -10   1   18.08    0.94
  -7  10  -1   17.62    0.80
   6 -10   1    0.38    0.23
   6 -10   1    0.29    0.26
  -6  10  -1    0.47    0.25
  -6  10  -1    0.73    0.30
   5 -10   1   23.76    1.00
   5 -10   1   23.37    0.87
  -5  10  -1   23.73    0.88
  -5  10  -1   24.80    0.99
   4 -10   1    1.21    0.26
   4 -10   1    1.16    0.28
  -4  10  -1    1.34    0.27
  -4  10  -1    1.22    0.33
  -4  10  -1    1.32    0.29
   3 -10   1    6.23    0.40
   3 -10   1    6.58    0.50
  -3  10  -1    5.77    0.60
  -3  10  -1    6.59    0.45
   2 -10   1   21.65    0.74
   2 -10   1   21.16    0.88
  -2  10  -1   20.45    0.77
  -2  10  -1   19.89    0.93
   1 -10   1   41.37    1.15
   1 -10   1   43.28    1.34
  -1  10  -1   40.75    1.16
  -1  10  -1   42.45    1.22
  -1  10  -1   42.99    1.37
   0 -10   1   14.24    0.72
   0 -10   1   14.60    0.60
   0  10  -1   13.88    0.62
   0  10  -1   15.22    0.69
   0  10  -1   15.31    0.62
  -1 -10   1   21.71    0.92
  -1 -10   1   21.66    0.75
   1  10  -1   22.63    0.78
   1  10  -1   20.60    0.78
   1  10  -1   21.69    0.81
  -2 -10   1    1.71    0.33
  -2 -10   1    1.43    0.24
   2  10  -1    1.62    0.24
   2  10  -1    1.53    0.27
   2  10  -1    1.24    0.24
  -3 -10   1    1.13    0.29
  -3 -10   1    0.65    0.20
   3  10  -1    0.85    0.18
   3  10  -1    1.08    0.27
  -4 -10   1    3.81    0.41
  -4 -10   1    4.86    0.54
   4  10  -1    5.27    0.50
  -5 -10   1    0.37    0.22
  -5 -10   1    0.24    0.28
   5  10  -1    0.44    0.27
  -6 -10   1    1.72    0.35
  -6 -10   1    1.92    0.42
   6  10  -1    1.33    0.37
  -7 -10   1    0.96    0.38
  -7 -10   1    1.41    0.36
   7  10  -1    1.66    0.40
  -8 -10   1   11.03    0.75
  -8 -10   1   10.55    0.96
   8  10  -1    9.93    0.75
  -9 -10   1    5.44    0.75
  -9 -10   1    6.52    0.72
   9  10  -1    5.44    0.67
 -10 -10   1   14.20    1.06
 -10 -10   1   14.02    0.94
  10  10  -1   12.58    0.92
 -11 -10   1    0.94    0.49
 -11 -10   1    0.23    0.36
  11  10  -1    0.82    0.45
 -12 -10   1    1.19    0.64
 -12 -10   1    2.41    0.56
  12  10  -1    2.27    0.59
  13  -9   1    0.97    0.50
  13  -9   1    2.16    0.53
 -13   9  -1    1.76    0.68
 -13   9  -1    3.38    0.55
  12  -9   1    0.69    0.42
  12  -9   1    0.44    0.43
 -12   9  -1    0.18    0.32
  11  -9   1    0.09    0.28
  11  -9   1    0.41    0.35
 -11   9  -1    0.10    0.28
  10  -9   1    1.29    0.43
  10  -9   1    1.27    0.39
 -10   9  -1    1.12    0.36
 -10   9  -1    1.33    0.35
   9  -9   1   26.38    1.10
   9  -9   1   28.18    1.27
  -9   9  -1   26.62    1.09
  -9   9  -1   26.25    1.06
   8  -9   1    0.50    0.29
   8  -9   1    0.43    0.28
  -8   9  -1   -0.14    0.22
  -8   9  -1    0.35    0.26
   7  -9   1   23.67    1.06
   7  -9   1   24.69    0.98
  -7   9  -1   25.15    1.08
  -7   9  -1   23.74    0.93
   6  -9   1   11.04    0.69
   6  -9   1    8.91    0.54
  -6   9  -1    9.20    0.63
  -6   9  -1    9.91    0.56
   5  -9   1    6.41    0.52
   5  -9   1    5.98    0.44
  -5   9  -1    6.55    0.50
  -5   9  -1    6.04    0.42
   4  -9   1   56.07    1.44
   4  -9   1   54.66    1.60
  -4   9  -1   54.62    1.46
  -4   9  -1   54.14    1.55
   3  -9   1    7.05    0.46
   3  -9   1    5.56    0.38
  -3   9  -1    6.35    0.41
  -3   9  -1    6.08    0.41
   2  -9   1    7.10    0.40
   2  -9   1    7.29    0.47
  -2   9  -1    7.62    0.52
  -2   9  -1    7.13    0.42
   1  -9   1    0.33    0.14
   1  -9   1    0.24    0.19
  -1   9  -1    0.17    0.15
  -1   9  -1    0.30    0.20
   0  -9   1   39.20    1.23
   0  -9   1   38.41    1.05
   0   9  -1   37.63    1.17
   0   9  -1   37.84    1.11
   0   9  -1   38.85    1.08
  -1  -9   1    5.71    0.43
  -1  -9   1    4.86    0.33
   1   9  -1    5.87    0.38
   1   9  -1    6.64    0.41
   1   9  -1    5.60    0.37
  -2  -9   1    0.25    0.16
  -2  -9   1    0.31    0.23
   2   9  -1    0.44    0.15
   2   9  -1    0.29    0.18
  -3  -9   1    0.10    0.14
  -3  -9   1    0.15    0.24
   3   9  -1    0.03    0.17
   3   9  -1    0.05    0.11
  -4  -9   1    2.23    0.41
  -4  -9   1    2.21    0.32
   4   9  -1    1.97    0.31
  -5  -9   1   25.72    1.09
  -5  -9   1   25.31    0.95
   5   9  -1   26.23    0.99
  -6  -9   1    5.79    0.63
  -6  -9   1    5.08    0.51
   6   9  -1    6.30    0.59
  -7  -9   1    5.18    0.54
  -7  -9   1    5.83    0.66
   7   9  -1    5.25    0.57
  -8  -9   1    0.56    0.34
  -8  -9   1    0.10    0.32
   8   9  -1    0.82    0.31
  -9  -9   1   -0.19    0.28
  -9  -9   1    0.56    0.36
   9   9  -1    0.42    0.30
 -10  -9   1    6.62    0.85
 -10  -9   1    6.59    0.74
  10   9  -1    6.62    0.74
 -11  -9   1    1.21    0.50
 -11  -9   1    0.62    0.43
  11   9  -1    0.28    0.34
 -12  -9   1    0.45    0.49
 -12  -9   1    0.72    0.44
  12   9  -1    0.80    0.48
 -13  -9   1    0.45    0.48
 -13  -9   1   -0.27    0.42
  13   9  -1   -0.63    0.28
  13  -8   1    0.73    0.47
 -13   8  -1    0.31    0.36
  12  -8   1   -0.02    0.38
  12  -8   1    0.83    0.49
 -12   8  -1    0.21    0.32
  11  -8   1    1.53    0.42
  11  -8   1    1.51    0.47
 -11   8  -1    1.20    0.37
 -11   8  -1    0.74    0.33
  10  -8   1   -0.11    0.31
  10  -8   1   -0.05    0.26
 -10   8  -1   -0.04    0.21
 -10   8  -1    0.18    0.25
   9  -8   1    0.53    0.31
   9  -8   1   -0.27    0.22
  -9   8  -1   -0.52    0.20
  -9   8  -1    0.03    0.24
   8  -8   1   45.04    1.42
   8  -8   1   44.41    1.56
  -8   8  -1   43.03    1.55
  -8   8  -1   41.51    1.35
  -8   8  -1   45.54    1.39
   7  -8   1    1.35    0.36
   7  -8   1    2.41    0.38
  -7   8  -1    2.70    0.44
  -7   8  -1    1.89    0.33
  -7   8  -1    3.32    0.41
   6  -8   1    8.81    0.58
   6  -8   1    8.36    0.52
  -6   8  -1    7.62    0.57
  -6   8  -1    7.76    0.49
   5  -8   1   14.48    0.63
   5  -8   1   14.15    0.70
  -5   8  -1   14.41    0.63
  -5   8  -1   14.73    0.71
   4  -8   1    0.08    0.16
   4  -8   1    0.33    0.21
  -4   8  -1    0.31    0.19
  -4   8  -1    0.27    0.17
   3  -8   1   21.23    0.71
   3  -8   1   20.40    0.79
  -3   8  -1   21.36    0.74
  -3   8  -1   22.27    0.78
   2  -8   1   15.46    0.66
   2  -8   1   15.56    0.57
  -2   8  -1   17.02    0.74
  -2   8  -1   16.08    0.62
  -2   8  -1   15.87    0.61
   1  -8   1   14.00    0.52
   1  -8   1   12.70    0.59
  -1   8  -1   13.11    0.63
  -1   8  -1   13.70    0.55
   0  -8   1   34.97    0.93
   0  -8   1   34.31    1.07
   0   8  -1   33.02    0.95
   0   8  -1   33.44    0.98
   0   8  -1   31.88    1.02
  -1  -8   1    4.94    0.31
  -1  -8   1    4.88    0.39
   1   8  -1    5.12    0.35
   1   8  -1    4.99    0.36
   1   8  -1    5.30    0.34
  -2  -8   1    1.48    0.21
  -2  -8   1    1.55    0.27
   2   8  -1    1.56    0.24
   2   8  -1    1.77    0.21
  -3  -8   1    6.51    0.49
  -3  -8   1    6.45    0.38
   3   8  -1    6.64    0.41
   3   8  -1    5.93    0.29
  -4  -8   1    0.75    0.25
  -4  -8   1    0.94    0.24
   4   8  -1    0.98    0.24
  -5  -8   1   49.04    1.57
  -5  -8   1   49.18    1.42
   5   8  -1   49.08    1.44
  -6  -8   1    0.38    0.27
  -6  -8   1   -0.01    0.19
   6   8  -1    0.28    0.24
  -7  -8   1    5.54    0.62
  -7  -8   1    5.92    0.58
   7   8  -1    5.69    0.59
  -8  -8   1    0.32    0.32
  -8  -8   1    0.04    0.26
   8   8  -1    0.13    0.25
  -9  -8   1   13.73    0.94
  -9  -8   1   11.49    0.78
   9   8  -1   12.72    0.84
 -10  -8   1    1.44    0.46
 -10  -8   1    0.79    0.42
  10   8  -1    0.82    0.36
 -11  -8   1    7.28    0.90
 -11  -8   1    5.33    0.70
  11   8  -1    6.63    0.78
 -12  -8   1   17.61    1.23
 -12  -8   1   17.26    1.09
  12   8  -1   17.93    1.10
 -13  -8   1    0.00    0.53
 -13  -8   1   -0.36    0.42
  13   8  -1   -0.47    0.36
  13  -7   1    0.62    0.41
 -13   7  -1    0.21    0.34
  12  -7   1    2.21    0.50
 -12   7  -1    1.45    0.41
 -12   7  -1    2.14    0.46
  11  -7   1    9.41    0.93
  11  -7   1   10.36    0.78
 -11   7  -1   10.27    0.73
 -11   7  -1    9.53    0.69
  10  -7   1    6.34    0.70
  10  -7   1    6.30    0.65
 -10   7  -1    7.14    0.64
 -10   7  -1    5.48    0.58
   9  -7   1    0.27    0.33
   9  -7   1    0.79    0.29
  -9   7  -1    0.40    0.25
  -9   7  -1    0.04    0.26
  -9   7  -1    0.65    0.26
   8  -7   1    3.83    0.44
   8  -7   1    4.99    0.57
  -8   7  -1    3.35    0.41
  -8   7  -1    3.34    0.40
  -8   7  -1    4.44    0.56
   7  -7   1    7.08    0.54
   7  -7   1    6.00    0.47
  -7   7  -1    6.04    0.47
  -7   7  -1    6.60    0.47
  -7   7  -1    6.33    0.61
   6  -7   1   34.49    1.21
   6  -7   1   34.73    1.09
  -6   7  -1   32.37    1.18
  -6   7  -1   35.15    1.07
  -6   7  -1   33.10    1.06
   5  -7   1    2.13    0.28
   5  -7   1    2.12    0.33
  -5   7  -1    2.20    0.29
  -5   7  -1    2.30    0.29
  -5   7  -1    1.89    0.32
   4  -7   1   59.45    1.48
   4  -7   1   61.52    1.63
  -4   7  -1   61.89    1.51
  -4   7  -1   59.12    1.62
   3  -7   1   34.27    0.96
   3  -7   1   35.62    1.07
  -3   7  -1   36.33    1.05
  -3   7  -1   34.99    0.99
   2  -7   1   24.40    0.80
   2  -7   1   24.28    0.72
   2  -7   1   22.92    0.80
  -2   7  -1   23.33    0.75
  -2   7  -1   24.34    0.75
   1  -7   1   45.99    1.24
   1  -7   1   44.25    1.19
   1  -7   1   43.31    1.08
  -1   7  -1   43.05    1.25
  -1   7  -1   44.37    1.15
   0  -7   1   25.32    0.86
   0  -7   1   25.75    0.74
   0   7  -1   26.61    0.78
   0   7  -1   27.58    0.85
   0   7  -1   26.82    0.80
  -1  -7   1   82.82    1.78
  -1  -7   1   77.10    1.94
   1   7  -1   79.94    1.81
   1   7  -1   80.00    1.87
   1   7  -1   79.19    1.85
  -2  -7   1    3.22    0.26
  -2  -7   1    3.27    0.35
   2   7  -1    3.58    0.32
   2   7  -1    3.95    0.25
  -3  -7   1   46.89    1.37
  -3  -7   1   47.05    1.23
   3   7  -1   47.20    1.27
  -4  -7   1   17.43    0.68
  -4  -7   1   18.65    0.81
   4   7  -1   17.85    0.72
  -5  -7   1   10.57    0.63
  -5  -7   1    8.62    0.52
   5   7  -1    9.57    0.57
  -6  -7   1    6.23    0.60
  -6  -7   1    6.74    0.51
   6   7  -1    5.66    0.51
  -7  -7   1   40.62    1.53
  -7  -7   1   44.77    1.41
   7   7  -1   43.61    1.42
  -8  -7   1    1.70    0.43
  -8  -7   1    1.58    0.36
  -8  -7   1    0.98    0.19
   8   7  -1    0.93    0.32
  -9  -7   1    2.25    0.48
  -9  -7   1    1.69    0.46
   9   7  -1    1.09    0.37
 -10  -7   1    2.75    0.64
 -10  -7   1    3.48    0.57
  10   7  -1    2.26    0.49
 -11  -7   1    5.00    0.66
 -11  -7   1    4.81    0.77
  11   7  -1    5.81    0.73
 -12  -7   1    0.64    0.44
 -12  -7   1   -0.28    0.37
  12   7  -1    0.17    0.35
 -13  -7   1    1.87    0.52
 -13  -7   1    2.46    0.64
  13   7  -1    1.55    0.53
  13  -6   1    1.13    0.47
 -13   6  -1    1.39    0.41
 -13   6  -1    1.19    0.44
  12  -6   1    0.09    0.29
 -12   6  -1    0.61    0.33
 -12   6  -1   -0.33    0.22
  11  -6   1    0.30    0.29
  11  -6   1    0.93    0.38
 -11   6  -1    0.38    0.31
 -11   6  -1    0.81    0.33
  10  -6   1    5.76    0.67
  10  -6   1    5.26    0.61
 -10   6  -1    5.70    0.57
 -10   6  -1    6.36    0.62
   9  -6   1   12.31    0.78
   9  -6   1   11.25    0.72
  -9   6  -1   10.25    0.65
  -9   6  -1   11.42    0.77
  -9   6  -1   12.50    0.69
   8  -6   1    8.67    0.63
   8  -6   1    8.99    0.61
  -8   6  -1    9.04    0.68
  -8   6  -1    8.06    0.53
  -8   6  -1    8.16    0.54
   7  -6   1    0.31    0.22
   7  -6   1   -0.05    0.21
  -7   6  -1   -0.06    0.17
  -7   6  -1    0.36    0.20
  -7   6  -1   -0.17    0.22
   6  -6   1    0.65    0.22
   6  -6   1    1.03    0.23
  -6   6  -1    0.90    0.23
  -6   6  -1    0.92    0.26
  -6   6  -1    0.64    0.21
   5  -6   1   27.58    0.97
   5  -6   1   26.41    0.86
  -5   6  -1   26.65    0.96
  -5   6  -1   27.32    0.86
  -5   6  -1   27.48    0.87
   4  -6   1   36.09    1.11
   4  -6   1   37.05    1.02
  -4   6  -1   36.35    1.12
  -4   6  -1   38.62    1.04
  -4   6  -1   36.18    1.02
   3  -6   1    1.94    0.23
   3  -6   1    1.72    0.24
  -3   6  -1    1.78    0.24
  -3   6  -1    2.29    0.25
   2  -6   1    1.78    0.24
   2  -6   1    1.32    0.18
   2  -6   1    1.53    0.22
  -2   6  -1    1.82    0.22
  -2   6  -1    1.41    0.19
   1  -6   1    8.08    0.34
   1  -6   1    7.87    0.40
   1  -6   1    9.30    0.41
  -1   6  -1    8.36    0.38
  -1   6  -1    8.43    0.38
   0  -6   1   87.66    2.03
   0  -6   1   85.86    1.84
   0   6  -1   88.36    2.02
   0   6  -1   86.31    1.95
   0   6  -1   87.43    1.88
  -1  -6   1   21.75    0.63
  -1  -6   1   20.33    0.72
   1   6  -1   21.43    0.66
   1   6  -1   20.76    0.63
  -2  -6   1    2.31    0.24
  -2  -6   1    2.30    0.29
   2   6  -1    2.53    0.19
   2   6  -1    2.46    0.26
  -3  -6   1    8.94    0.51
  -3  -6   1    9.19    0.42
   3   6  -1    8.08    0.43
  -4  -6   1    6.86    0.40
  -4  -6   1    6.34    0.46
   4   6  -1    7.25    0.45
  -5  -6   1    8.45    0.49
  -5  -6   1    9.17    0.58
   5   6  -1    9.57    0.54
  -6  -6   1    7.11    0.55
  -6  -6   1    6.54    0.49
   6   6  -1    5.94    0.47
  -7  -6   1    4.24    0.56
  -7  -6   1    5.08    0.52
   7   6  -1    5.19    0.53
  -8  -6   1    5.55    0.29
  -8  -6   1    6.27    0.59
  -8  -6   1    4.91    0.63
   8   6  -1    5.40    0.56
  -9  -6   1    8.93    0.85
  -9  -6   1    9.80    0.73
   9   6  -1    9.92    0.75
 -10  -6   1    3.31    0.61
 -10  -6   1    3.40    0.53
  10   6  -1    3.72    0.59
 -11  -6   1    0.76    0.37
 -11  -6   1   -0.40    0.39
  11   6  -1    0.01    0.30
 -12  -6   1    6.77    0.81
 -12  -6   1    6.56    0.87
  12   6  -1    5.77    0.77
 -13  -6   1    2.11    0.52
 -13  -6   1    2.04    0.64
  13   6  -1    1.83    0.55
 -14  -6   1    1.35    0.50
  14   6  -1    0.32    0.47
  14  -5   1    1.18    0.47
 -14   5  -1    0.41    0.38
  13  -5   1    1.22    0.47
 -13   5  -1    2.30    0.49
 -13   5  -1    1.44    0.44
  12  -5   1    7.95    0.80
 -12   5  -1    9.19    0.72
 -12   5  -1    9.09    0.72
  11  -5   1    8.12    0.75
 -11   5  -1    7.36    0.68
 -11   5  -1    7.75    0.70
  10  -5   1    1.37    0.35
  10  -5   1    1.09    0.36
 -10   5  -1    1.42    0.35
 -10   5  -1    1.22    0.35
 -10   5  -1    1.44    0.47
   9  -5   1    1.08    0.36
   9  -5   1    0.61    0.30
  -9   5  -1    0.94    0.28
  -9   5  -1    0.56    0.28
  -9   5  -1    1.05    0.35
   8  -5   1   15.81    0.85
   8  -5   1   15.60    0.77
  -8   5  -1   16.32    0.74
  -8   5  -1   15.97    0.74
  -8   5  -1   15.91    0.87
   7  -5   1   22.34    0.86
   7  -5   1   21.86    0.92
  -7   5  -1   22.54    0.84
  -7   5  -1   21.21    0.83
  -7   5  -1   23.52    0.99
   6  -5   1   71.24    1.79
   6  -5   1   73.15    1.92
  -6   5  -1   72.01    1.96
  -6   5  -1   72.57    1.78
  -6   5  -1   70.18    1.76
   5  -5   1   18.59    0.74
   5  -5   1   18.83    0.68
  -5   5  -1   18.97    0.78
  -5   5  -1   19.29    0.68
  -5   5  -1   18.57    0.67
   4  -5   1   12.78    0.51
   4  -5   1   12.08    0.56
  -4   5  -1   12.78    0.51
  -4   5  -1   12.78    0.57
  -4   5  -1   13.00    0.52
   3  -5   1    1.75    0.23
   3  -5   1    1.26    0.18
   3  -5   1    1.56    0.21
  -3   5  -1    1.85    0.25
  -3   5  -1    1.42    0.19
  -3   5  -1    1.71    0.21
   2  -5   1  123.25    2.63
   2  -5   1  122.11    2.65
   2  -5   1  123.95    2.49
  -2   5  -1  117.12    2.52
  -2   5  -1  123.36    2.61
   1  -5   1  147.38    2.93
   1  -5   1  149.99    3.14
   1  -5   1  151.76    3.11
  -1   5  -1  144.99    3.00
  -1   5  -1  147.04    3.08
   0  -5   1  136.46    2.71
   0  -5   1  138.47    2.92
   0   5  -1  133.31    2.85
   0   5  -1  136.98    2.93
  -1  -5   1  101.01    2.27
  -1  -5   1  103.28    2.09
   1   5  -1  103.02    2.19
   1   5  -1   99.50    2.12
  -2  -5   1   14.72    0.50
  -2  -5   1   16.28    0.60
   2   5  -1   15.76    0.54
   2   5  -1   16.54    0.45
  -3  -5   1    4.97    0.36
  -3  -5   1    5.11    0.31
   3   5  -1    5.39    0.35
  -4  -5   1   38.50    1.18
  -4  -5   1   37.00    1.05
   4   5  -1   38.83    1.10
  -5  -5   1   43.41    1.23
  -5  -5   1   44.12    1.38
   5   5  -1   45.00    1.28
  -6  -5   1    7.55    0.48
  -6  -5   1    8.08    0.56
   6   5  -1    7.42    0.50
  -7  -5   1    0.49    0.30
  -7  -5   1    0.13    0.22
  -7  -5   1    0.52    0.12
   7   5  -1    0.34    0.23
  -8  -5   1    4.11    0.54
  -8  -5   1    3.80    0.46
   8   5  -1    3.93    0.50
  -9  -5   1   13.31    0.91
  -9  -5   1   12.15    0.75
   9   5  -1   12.66    0.78
 -10  -5   1    0.35    0.36
 -10  -5   1    0.31    0.35
  10   5  -1   -0.09    0.32
 -11  -5   1   11.59    0.82
 -11  -5   1   12.15    1.10
  11   5  -1   11.24    0.83
 -12  -5   1    0.45    0.50
 -12  -5   1   -0.05    0.28
  12   5  -1    0.55    0.36
 -13  -5   1   15.93    1.20
 -13  -5   1   17.58    1.08
  13   5  -1   19.79    1.16
 -14  -5   1    0.25    0.47
  14   5  -1   -0.15    0.42
  14  -4   1    0.69    0.45
 -14   4  -1    0.58    0.37
 -14   4  -1    1.02    0.45
  13  -4   1    4.52    0.69
 -13   4  -1    3.93    0.60
 -13   4  -1    3.98    0.60
  12  -4   1   13.66    0.89
 -12   4  -1   14.05    0.86
 -12   4  -1   12.49    0.81
  11  -4   1   19.45    1.04
 -11   4  -1   18.23    0.93
 -11   4  -1   19.27    0.95
  10  -4   1    2.49    0.44
 -10   4  -1    4.44    0.49
 -10   4  -1    2.95    0.45
 -10   4  -1    2.92    0.53
   9  -4   1    1.94    0.41
   9  -4   1    2.08    0.41
  -9   4  -1    2.60    0.39
  -9   4  -1    1.95    0.38
  -9   4  -1    2.42    0.45
   8  -4   1   29.55    1.15
   8  -4   1   27.36    1.05
  -8   4  -1   32.62    1.25
  -8   4  -1   30.89    1.04
  -8   4  -1   29.22    1.04
   7  -4   1    0.79    0.24
   7  -4   1    1.13    0.28
  -7   4  -1    0.35    0.27
  -7   4  -1    0.68    0.22
  -7   4  -1    1.08    0.25
   6  -4   1   10.02    0.52
   6  -4   1    9.80    0.55
  -6   4  -1    9.56    0.48
  -6   4  -1    9.08    0.49
  -6   4  -1   10.53    0.62
   5  -4   1  144.44    3.05
   5  -4   1  141.51    3.21
  -5   4  -1  144.00    3.26
  -5   4  -1  144.01    3.04
  -5   4  -1  141.97    3.02
   4  -4   1  139.35    2.83
   4  -4   1  132.83    2.97
  -4   4  -1  135.71    2.83
  -4   4  -1  132.63    2.80
  -4   4  -1  133.10    3.00
   3  -4   1   17.74    0.55
   3  -4   1   17.79    0.59
   3  -4   1   17.42    0.60
  -3   4  -1   16.66    0.54
  -3   4  -1   16.75    0.55
  -3   4  -1   16.92    0.61
   2  -4   1   63.22    1.50
   2  -4   1   64.06    1.40
   2  -4   1   65.29    1.49
  -2   4  -1   65.15    1.43
  -2   4  -1   66.76    1.49
   1  -4   1  384.52    7.75
   1  -4   1  393.68    7.73
   1  -4   1  394.69    7.41
  -1   4  -1  399.39    7.72
  -1   4  -1  395.75    7.49
   0  -4   1  390.66    7.24
   0  -4   1  377.78    7.59
   0   4  -1  387.14    7.55
   0   4  -1  383.77    7.72
  -1  -4   1  114.37    2.24
  -1  -4   1  108.66    2.40
   1   4  -1  110.80    2.27
   1   4  -1  113.26    2.33
  -2  -4   1    1.49    0.16
  -2  -4   1    1.41    0.21
  -2  -4   1    1.49    0.12
   2   4  -1    1.30    0.17
  -3  -4   1   19.01    0.68
  -3  -4   1   19.05    0.61
  -3  -4   1   19.54    0.50
   3   4  -1   18.40    0.62
  -4  -4   1    6.80    0.44
  -4  -4   1    6.88    0.38
   4   4  -1    6.48    0.39
  -5  -4   1   36.41    1.18
  -5  -4   1   36.02    1.07
   5   4  -1   37.57    1.11
  -6  -4   1   51.08    1.17
  -6  -4   1   49.33    1.55
  -6  -4   1   52.64    1.44
   6   4  -1   50.84    1.44
  -7  -4   1    6.16    0.62
  -7  -4   1    6.00    0.47
   7   4  -1    6.26    0.55
  -8  -4   1    0.37    0.33
  -8  -4   1    0.86    0.29
   8   4  -1    1.12    0.31
  -9  -4   1   52.82    1.70
  -9  -4   1   54.50    1.88
   9   4  -1   54.81    1.74
 -10  -4   1   17.55    0.93
 -10  -4   1   16.27    1.02
  10   4  -1   16.07    0.92
 -11  -4   1   -0.04    0.42
 -11  -4   1    0.63    0.39
  11   4  -1    0.19    0.32
 -12  -4   1    2.62    0.51
 -12  -4   1    1.93    0.57
  12   4  -1    2.36    0.51
 -13  -4   1    0.56    0.43
 -13  -4   1   -0.39    0.36
  13   4  -1   -0.50    0.38
 -14  -4   1    2.27    0.55
  14   4  -1    1.70    0.58
  14  -3   1    0.42    0.38
 -14   3  -1    0.93    0.43
 -14   3  -1    0.17    0.37
  13  -3   1   10.47    0.97
 -13   3  -1   11.15    0.83
 -13   3  -1   10.47    0.90
  12  -3   1   10.67    0.93
 -12   3  -1    9.30    0.83
 -12   3  -1    9.29    0.81
  11  -3   1   10.69    0.77
 -11   3  -1   11.09    0.72
 -11   3  -1   13.21    0.96
 -11   3  -1   10.40    0.76
  10  -3   1   30.10    1.21
 -10   3  -1   30.08    1.15
 -10   3  -1   29.46    1.35
 -10   3  -1   28.45    1.16
   9  -3   1    0.62    0.31
  -9   3  -1    0.19    0.21
  -9   3  -1    0.96    0.36
  -9   3  -1    0.52    0.27
   8  -3   1    7.84    0.54
   8  -3   1    8.57    0.59
  -8   3  -1    7.67    0.50
  -8   3  -1    7.90    0.64
  -8   3  -1    7.05    0.50
   7  -3   1    5.31    0.52
   7  -3   1    5.77    0.44
  -7   3  -1    6.05    0.56
  -7   3  -1    5.58    0.43
  -7   3  -1    5.75    0.42
   6  -3   1   51.21    1.47
   6  -3   1   51.05    1.37
  -6   3  -1   50.29    1.36
  -6   3  -1   49.97    1.50
  -6   3  -1   50.18    1.33
   5  -3   1    3.26    0.33
   5  -3   1    3.38    0.33
  -5   3  -1    3.34    0.37
  -5   3  -1    3.39    0.31
  -5   3  -1    3.83    0.34
   4  -3   1   72.28    1.73
   4  -3   1   70.09    1.64
  -4   3  -1   72.02    1.62
  -4   3  -1   73.20    1.64
  -4   3  -1   72.72    1.78
   3  -3   1   35.04    0.89
   3  -3   1   34.79    0.95
   3  -3   1   36.75    0.96
  -3   3  -1   34.99    0.97
  -3   3  -1   36.02    0.88
  -3   3  -1   34.26    0.88
   2  -3   1   19.33    0.56
   2  -3   1   18.72    0.51
   2  -3   1   18.28    0.56
  -2   3  -1   19.78    0.53
  -2   3  -1   17.31    0.52
  -2   3  -1   18.54    0.56
   1  -3   1   37.78    0.92
   1  -3   1   37.99    0.84
   1  -3   1   40.23    0.88
   1  -3   1   39.47    0.91
  -1   3  -1   38.83    0.91
  -1   3  -1   37.47    0.87
   0  -3   1    6.16    0.28
   0  -3   1    8.32    0.27
   0   3  -1    8.93    0.33
   0   3  -1    8.59    0.31
  -1  -3   1    3.49    0.23
  -1  -3   1    3.55    0.19
  -1  -3   1    3.23    0.15
   1   3  -1    3.22    0.15
   1   3  -1    3.11    0.19
   1   3  -1    3.27    0.22
  -2  -3   1  281.05    5.68
  -2  -3   1  280.89    5.61
  -2  -3   1  291.41    5.41
   2   3  -1  279.23    5.44
  -3  -3   1    6.11    0.31
  -3  -3   1    6.71    0.37
   3   3  -1    6.91    0.34
  -4  -3   1  132.42    2.99
  -4  -3   1  135.41    2.82
   4   3  -1  132.97    2.84
  -5  -3   1    6.74    0.40
  -5  -3   1    6.56    0.46
  -5  -3   1    6.46    0.25
   5   3  -1    6.20    0.43
  -6  -3   1   85.54    2.06
  -6  -3   1   84.86    2.23
   6   3  -1   85.28    2.08
  -7  -3   1   55.68    1.58
  -7  -3   1   56.64    1.73
   7   3  -1   57.49    1.62
  -8  -3   1    1.80    0.34
  -8  -3   1    1.88    0.39
   8   3  -1    2.05    0.41
  -9  -3   1    5.70    0.66
  -9  -3   1    6.19    0.62
   9   3  -1    5.55    0.59
 -10  -3   1   11.19    0.77
 -10  -3   1   10.99    0.83
  10   3  -1   10.32    0.75
 -11  -3   1    4.62    0.68
 -11  -3   1    3.09    0.51
  11   3  -1    2.81    0.51
 -12  -3   1    0.20    0.37
 -12  -3   1   -0.06    0.33
  12   3  -1   -0.20    0.33
 -13  -3   1   -0.52    0.35
  13   3  -1    0.27    0.38
 -14  -3   1   -0.14    0.39
  14   3  -1    0.39    0.42
  14  -2   1    2.57    0.63
 -14   2  -1    3.15    0.58
 -14   2  -1    4.04    0.65
  13  -2   1    0.38    0.36
 -13   2  -1    0.13    0.29
 -13   2  -1   -0.14    0.30
  12  -2   1    0.99    0.43
 -12   2  -1    1.24    0.40
 -12   2  -1    0.89    0.38
  11  -2   1   10.03    0.78
 -11   2  -1   11.46    0.87
 -11   2  -1   11.34    0.76
 -11   2  -1   11.79    0.77
  10  -2   1    2.95    0.50
 -10   2  -1    3.07    0.48
 -10   2  -1    3.42    0.48
 -10   2  -1    4.31    0.62
   9  -2   1    0.73    0.30
  -9   2  -1    1.30    0.38
  -9   2  -1    1.00    0.29
  -9   2  -1    0.59    0.31
   8  -2   1    1.66    0.32
  -8   2  -1    1.67    0.32
  -8   2  -1    1.44    0.31
  -8   2  -1    1.98    0.38
   7  -2   1    5.82    0.45
   7  -2   1    6.10    0.45
  -7   2  -1    5.40    0.46
  -7   2  -1    5.17    0.46
  -7   2  -1    5.37    0.53
   6  -2   1    1.59    0.28
   6  -2   1    1.69    0.28
  -6   2  -1    1.51    0.28
  -6   2  -1    1.64    0.25
  -6   2  -1    1.80    0.28
   5  -2   1   33.58    0.97
   5  -2   1   32.86    1.02
  -5   2  -1   31.98    0.95
  -5   2  -1   34.35    1.08
  -5   2  -1   33.86    0.96
   4  -2   1   33.98    0.92
   4  -2   1   34.74    0.97
  -4   2  -1   34.11    0.92
  -4   2  -1   33.89    0.89
  -4   2  -1   33.16    1.00
   3  -2   1   63.64    1.42
   3  -2   1   62.98    1.49
   3  -2   1   65.69    1.52
  -3   2  -1   64.55    1.53
  -3   2  -1   64.95    1.41
  -3   2  -1   64.68    1.43
   2  -2   1  304.05    6.06
   2  -2   1  313.01    5.86
   2  -2   1  305.63    5.82
   2  -2   1  314.78    6.07
  -2   2  -1  306.63    6.08
  -2   2  -1  301.86    5.85
  -2   2  -1  305.34    5.81
   1  -2   1    1.53    0.12
   1  -2   1    1.56    0.13
  -1   2  -1    1.64    0.14
  -1   2  -1    1.72    0.14
  -1   2  -1    1.69    0.13
  -1  -2   1  118.27    2.27
   1   2  -1  117.84    2.41
   1   2  -1  116.01    2.29
  -2  -2   1   32.63    0.78
  -2  -2   1   33.40    0.86
   2   2  -1   33.19    0.86
   2   2  -1   32.77    0.80
  -3  -2   1   49.47    1.25
  -3  -2   1   49.09    1.15
   3   2  -1   49.18    1.17
  -4  -2   1   72.46    1.65
  -4  -2   1   71.67    1.77
  -4  -2   1   70.23    1.52
   4   2  -1   73.01    1.67
  -5  -2   1  125.75    2.78
  -5  -2   1  129.23    2.96
   5   2  -1  130.33    2.81
  -6  -2   1    5.60    0.41
  -6  -2   1    6.06    0.47
   6   2  -1    6.04    0.45
  -7  -2   1   62.03    1.82
  -7  -2   1   61.79    1.68
   7   2  -1   61.34    1.71
  -8  -2   1    1.63    0.38
  -8  -2   1    1.93    0.33
   8   2  -1    1.58    0.35
  -9  -2   1    5.29    0.62
  -9  -2   1    4.19    0.51
   9   2  -1    4.75    0.54
 -10  -2   1   36.01    1.37
 -10  -2   1   37.00    1.52
  10   2  -1   37.13    1.42
 -11  -2   1   -0.13    0.32
 -11  -2   1    0.09    0.32
  11   2  -1    0.24    0.30
 -12  -2   1    3.60    0.68
 -12  -2   1    3.31    0.54
  12   2  -1    2.42    0.52
 -13  -2   1    0.64    0.36
  13   2  -1   -0.47    0.30
 -14  -2   1   14.21    1.03
  14   2  -1   15.00    1.10
  14  -1   1    0.42    0.44
 -14   1  -1   -0.22    0.36
 -14   1  -1   -0.18    0.34
  13  -1   1    3.12    0.62
 -13   1  -1    3.07    0.58
 -13   1  -1    2.42    0.54
  12  -1   1    0.24    0.32
 -12   1  -1   -0.27    0.36
 -12   1  -1    0.19    0.36
 -12   1  -1    0.54    0.35
  11  -1   1    6.74    0.70
 -11   1  -1    6.90    0.70
 -11   1  -1    6.26    0.64
 -11   1  -1    6.95    0.80
  10  -1   1   20.89    0.99
 -10   1  -1   20.66    1.11
 -10   1  -1   19.38    0.94
   9  -1   1    4.87    0.55
  -9   1  -1    4.80    0.50
  -9   1  -1    4.60    0.58
   8  -1   1   14.01    0.38
   8  -1   1   14.08    0.71
  -8   1  -1   12.93    0.66
  -8   1  -1   14.67    0.81
   7  -1   1   26.24    0.96
  -7   1  -1   28.72    1.10
  -7   1  -1   27.92    0.95
   6  -1   1    1.18    0.24
  -6   1  -1    1.47    0.24
  -6   1  -1    1.29    0.30
   5  -1   1    3.31    0.32
   5  -1   1    2.99    0.32
  -5   1  -1    3.21    0.37
  -5   1  -1    3.36    0.30
   4  -1   1  103.35    2.31
   4  -1   1  104.81    2.23
  -4   1  -1  102.73    2.20
  -4   1  -1  103.64    2.38
   3  -1   1    2.37    0.24
   3  -1   1    2.12    0.21
   3  -1   1    2.67    0.22
  -3   1  -1    2.45    0.18
  -3   1  -1    2.18    0.23
   2  -1   1  116.42    2.63
   2  -1   1  133.78    2.55
   2  -1   1  134.46    2.68
  -2   1  -1  130.16    2.65
  -2   1  -1  129.11    2.53
  -2   1  -1  130.41    2.68
   1  -1   1    0.29    0.05
  -1   1  -1    0.65    0.07
   0  -1   1    0.00    0.01
   0  -1   1    0.00    0.01
   0  -1   1    0.00    0.01
   0   1  -1    0.01    0.02
   0   1  -1    0.00    0.01
   0   1  -1   -0.01    0.01
  -1  -1   1   -0.03    0.03
   1   1  -1   -0.06    0.01
  -2  -1   1    0.72    0.07
  -2  -1   1    0.66    0.16
  -2  -1   1    0.69    0.12
   2   1  -1    0.57    0.13
   2   1  -1    0.72    0.17
  -3  -1   1    4.11    0.24
  -3  -1   1    3.82    0.29
   3   1  -1    3.92    0.26
  -4  -1   1   36.91    0.97
  -4  -1   1   37.72    1.08
   4   1  -1   36.62    0.99
  -5  -1   1   48.83    1.40
  -5  -1   1   50.44    1.29
   5   1  -1   48.52    1.30
  -6  -1   1   71.41    1.93
  -6  -1   1   72.04    1.77
   6   1  -1   71.90    1.81
  -7  -1   1    7.93    0.56
  -7  -1   1    7.54    0.48
   7   1  -1    9.53    0.56
  -8  -1   1   28.07    1.02
  -8  -1   1   27.23    1.14
   8   1  -1   26.22    1.03
  -9  -1   1    0.87    0.31
  -9  -1   1   -0.02    0.31
   9   1  -1    0.53    0.28
 -10  -1   1    5.70    0.69
 -10  -1   1    6.22    0.61
  10   1  -1    5.21    0.60
 -11  -1   1    1.98    0.42
 -11  -1   1    1.92    0.55
  11   1  -1    3.29    0.52
 -12  -1   1    1.16    0.44
 -12  -1   1    0.23    0.44
  12   1  -1    1.29    0.42
 -13  -1   1   -0.06    0.35
  13   1  -1    0.94    0.42
 -14  -1   1   -0.55    0.36
 -14  -1   1    0.33    0.39
  14   1  -1    0.33    0.45
  14   0   1    0.15    0.43
 -14   0  -1   -0.14    0.33
 -14   0  -1   -0.55    0.33
  13   0   1   30.22    1.44
 -13   0  -1   32.07    1.43
 -13   0  -1   33.20    1.44
  12   0   1    0.15    0.32
 -12   0  -1    0.22    0.35
 -12   0  -1   -0.24    0.25
  11   0   1   25.71    1.18
 -11   0  -1   27.78    1.21
 -11   0  -1   29.18    1.40
  10   0   1    0.38    0.29
 -10   0  -1   -0.11    0.29
 -10   0  -1    1.04    0.37
   9   0   1   29.07    1.16
  -9   0  -1   30.12    1.29
  -9   0  -1   31.44    1.14
   8   0   1   -0.07    0.19
  -8   0  -1    0.04    0.23
  -8   0  -1   -0.12    0.18
   7   0   1    1.07    0.28
  -7   0  -1    0.55    0.28
  -7   0  -1    0.20    0.18
   6   0   1   -0.07    0.15
  -6   0  -1    0.32    0.24
  -6   0  -1   -0.21    0.13
   5   0   1    1.50    0.24
  -5   0  -1    1.40    0.27
  -5   0  -1    1.46    0.26
   4   0   1   -0.07    0.11
  -4   0  -1   -0.16    0.11
  -4   0  -1   -0.03    0.15
   3   0   1    1.79    0.19
  -3   0  -1    1.53    0.17
  -3   0  -1    1.78    0.22
   2   0   1    0.24    0.12
   2   0   1    0.01    0.08
   2   0   1    0.00    0.10
  -2   0  -1    0.05    0.09
  -2   0  -1   -0.06    0.10
  -2   0  -1    0.02    0.09
   1   0   1   -0.08    0.01
   1   0   1   -0.08    0.02
  -1   0  -1   -0.09    0.02
  -1   0  -1   -0.08    0.02
   0   0   1    0.00    0.00
   0   0   1    0.00    0.00
   0   0  -1    0.00    0.00
   0   0  -1    0.00    0.00
  -1   0   1   -0.01    0.01
  -1   0   1   -0.01    0.01
   1   0  -1   -0.02    0.01
   1   0  -1    0.00    0.02
  -2   0   1   -0.09    0.09
  -2   0   1   -0.15    0.10
  -2   0   1   -0.17    0.12
   2   0  -1   -0.13    0.09
   2   0  -1   -0.14    0.11
  -3   0   1  345.74    6.53
  -3   0   1  338.07    6.84
   3   0  -1  350.15    6.84
   3   0  -1  338.57    6.55
  -4   0   1    0.26    0.12
  -4   0   1   -0.01    0.13
   4   0  -1    0.04    0.12
  -5   0   1    2.71    0.34
  -5   0   1    2.95    0.29
   5   0  -1    2.77    0.16
   5   0  -1    2.51    0.30
  -6   0   1   -0.02    0.15
  -6   0   1   -0.10    0.20
   6   0  -1    0.06    0.06
   6   0  -1    0.05    0.17
  -7   0   1   21.74    0.83
  -7   0   1   21.35    0.93
   7   0  -1   22.28    0.88
   7   0  -1   22.06    0.51
  -8   0   1    0.04    0.19
  -8   0   1   -0.35    0.24
   8   0  -1    0.42    0.23
  -9   0   1    0.45    0.29
  -9   0   1    0.69    0.32
   9   0  -1    0.13    0.24
 -10   0   1    0.07    0.29
 -10   0   1    0.01    0.24
  10   0  -1    0.02    0.31
 -11   0   1   18.88    0.96
 -11   0   1   20.51    1.12
  11   0  -1   17.38    0.97
 -12   0   1    0.01    0.40
 -12   0   1   -0.23    0.28
  12   0  -1    0.08    0.36
 -13   0   1    0.46    0.37
 -13   0   1   -0.42    0.30
  13   0  -1    0.28    0.34
 -14   0   1   -0.19    0.36
 -14   0   1   -0.33    0.28
  14   0  -1   -0.18    0.38
  14   1   1   -0.40    0.32
 -14  -1  -1   -0.14    0.38
  13   1   1    3.04    0.62
 -13  -1  -1    2.25    0.54
  12   1   1   -0.23    0.26
 -12  -1  -1   -0.19    0.31
 -12  -1  -1    0.58    0.38
  11   1   1    6.88    0.72
 -11  -1  -1    5.94    0.75
 -11  -1  -1    6.61    0.67
  10   1   1   23.36    1.06
 -10  -1  -1   24.55    1.22
 -10  -1  -1   21.21    1.00
   9   1   1    5.36    0.56
  -9  -1  -1    5.72    0.56
  -9  -1  -1    5.66    0.67
   8   1   1   13.58    0.74
  -8  -1  -1   14.42    0.85
  -8  -1  -1   13.12    0.71
   7   1   1   27.41    0.97
  -7  -1  -1   26.53    0.94
  -7  -1  -1   26.20    1.06
   6   1   1    1.24    0.25
  -6  -1  -1    0.90    0.25
  -6  -1  -1    1.54    0.26
   5   1   1    3.03    0.31
  -5  -1  -1    3.44    0.33
  -5  -1  -1    3.05    0.38
   4   1   1  105.44    2.27
  -4  -1  -1  104.54    2.41
  -4  -1  -1  103.89    2.25
   3   1   1    3.09    0.22
  -3  -1  -1    2.48    0.25
  -3  -1  -1    2.76    0.21
   2   1   1  132.11    2.66
   2   1   1  129.82    2.53
  -2  -1  -1  133.58    2.53
  -2  -1  -1  115.20    2.63
   0   1   1    0.00    0.01
   0  -1  -1    0.00    0.00
   0  -1  -1    0.00    0.01
   0  -1  -1    0.00    0.01
   0  -1  -1    0.00    0.01
   0  -1  -1    0.00    0.01
  -2   1   1    0.60    0.11
  -2   1   1    0.50    0.11
  -2   1   1    0.53    0.10
  -2   1   1    0.80    0.13
   2  -1  -1    0.66    0.12
   2  -1  -1    0.42    0.09
   2  -1  -1    0.57    0.13
  -3   1   1    3.77    0.27
  -3   1   1    3.64    0.21
   3  -1  -1    3.47    0.23
   3  -1  -1    3.60    0.23
   3  -1  -1    3.55    0.25
  -4   1   1   38.34    1.07
  -4   1   1   37.59    0.97
   4  -1  -1   38.56    1.00
   4  -1  -1   38.05    1.03
  -5   1   1   47.53    1.23
  -5   1   1   48.04    1.36
   5  -1  -1   48.87    1.31
   5  -1  -1   49.39    1.27
  -6   1   1   72.77    1.92
  -6   1   1   70.96    1.74
   6  -1  -1   69.63    1.76
  -7   1   1    9.49    0.59
  -7   1   1    8.89    0.52
   7  -1  -1    8.23    0.54
  -8   1   1   27.30    1.15
  -8   1   1   28.01    1.00
   8  -1  -1   27.98    1.04
   8  -1  -1   28.04    0.72
  -9   1   1    0.46    0.31
  -9   1   1    0.23    0.26
   9  -1  -1    0.65    0.27
 -10   1   1    5.46    0.55
 -10   1   1    4.93    0.66
  10  -1  -1    5.84    0.61
 -11   1   1    1.88    0.42
 -11   1   1    1.62    0.41
 -11   1   1    2.44    0.51
  11  -1  -1    1.35    0.40
 -12   1   1    0.80    0.39
 -12   1   1    1.60    0.43
  12  -1  -1    1.49    0.43
 -13   1   1    0.82    0.41
 -13   1   1    1.03    0.41
  13  -1  -1    0.90    0.41
 -14   1   1   -0.52    0.32
 -14   1   1    0.54    0.38
  14  -1  -1   -0.02    0.43
  14   2   1    3.70    0.69
 -14  -2  -1    3.42    0.67
  13   2   1   -0.09    0.35
 -13  -2  -1    0.08    0.45
 -13  -2  -1   -0.49    0.27
  12   2   1    1.98    0.46
 -12  -2  -1    0.45    0.48
 -12  -2  -1    1.05    0.39
  11   2   1   10.66    0.79
 -11  -2  -1   11.54    0.78
 -11  -2  -1   11.65    0.94
  10   2   1    4.86    0.61
 -10  -2  -1    3.57    0.54
 -10  -2  -1    4.52    0.64
   9   2   1    1.19    0.37
  -9  -2  -1    1.22    0.38
  -9  -2  -1    0.95    0.35
   8   2   1    1.81    0.37
  -8  -2  -1    1.84    0.38
  -8  -2  -1    1.64    0.35
   7   2   1    5.18    0.50
  -7  -2  -1    5.00    0.53
  -7  -2  -1    5.43    0.49
   6   2   1    1.75    0.29
  -6  -2  -1    1.75    0.27
  -6  -2  -1    1.81    0.32
   5   2   1   33.07    1.00
  -5  -2  -1   34.64    1.00
  -5  -2  -1   35.07    1.12
   4   2   1   32.88    0.93
  -4  -2  -1   33.27    0.70
  -4  -2  -1   33.85    1.02
  -4  -2  -1   34.09    0.93
   3   2   1   65.02    1.48
  -3  -2  -1   66.62    1.59
  -3  -2  -1   66.31    1.47
   2   2   1  301.72    5.87
  -2  -2  -1  314.89    5.86
  -2  -2  -1  310.95    6.14
   1   2   1    1.40    0.12
   1   2   1    1.34    0.15
  -1  -2  -1    0.71    0.09
   0   2   1    0.05    0.08
   0   2   1    0.23    0.10
   0   2   1   -0.25    0.10
   0  -2  -1   -0.45    0.06
   1  -2  -1   70.24    1.45
  -2   2   1   34.56    0.74
  -2   2   1   28.12    0.79
  -2   2   1   33.29    0.74
   2  -2  -1   32.95    0.81
   2  -2  -1   32.92    0.80
   2  -2  -1   32.94    0.76
   2  -2  -1   33.70    0.75
  -3   2   1   47.23    1.07
  -3   2   1   48.60    1.19
  -3   2   1   47.44    1.08
   3  -2  -1   47.61    1.10
   3  -2  -1   47.18    1.15
   3  -2  -1   48.05    1.18
  -4   2   1   67.20    1.69
  -4   2   1   70.14    1.58
  -4   2   1   70.01    1.56
   4  -2  -1   72.82    1.61
   4  -2  -1   70.05    1.67
   4  -2  -1   70.32    1.72
  -5   2   1  126.94    2.67
  -5   2   1  124.17    2.88
  -5   2   1  121.31    2.67
   5  -2  -1  128.46    2.84
   5  -2  -1  128.33    2.72
  -6   2   1    6.86    0.39
  -6   2   1    5.84    0.44
  -6   2   1    5.30    0.37
   6  -2  -1    6.13    0.41
   6  -2  -1    6.11    0.42
  -7   2   1   60.23    1.61
  -7   2   1   60.45    1.59
  -7   2   1   62.66    1.79
   7  -2  -1   60.64    1.65
  -8   2   1    1.70    0.32
  -8   2   1    1.59    0.30
  -8   2   1    1.99    0.37
   8  -2  -1    1.30    0.32
  -9   2   1    3.80    0.46
  -9   2   1    4.69    0.59
  -9   2   1    4.79    0.48
   9  -2  -1    3.97    0.50
 -10   2   1   36.01    1.29
 -10   2   1   33.95    1.43
 -10   2   1   36.32    1.30
  10  -2  -1   36.24    1.34
 -11   2   1    0.38    0.32
 -11   2   1    0.42    0.30
 -11   2   1    0.68    0.33
  11  -2  -1    0.30    0.35
 -12   2   1    3.77    0.55
 -12   2   1    2.94    0.51
  12  -2  -1    2.57    0.50
 -13   2   1   -0.03    0.31
 -13   2   1   -0.12    0.31
  13  -2  -1    0.07    0.32
 -14   2   1   13.27    0.90
 -14   2   1   12.58    0.91
  14  -2  -1   14.34    1.07
  14   3   1   -0.23    0.40
 -14  -3  -1    0.54    0.41
  13   3   1    9.88    0.95
 -13  -3  -1    9.97    0.93
 -13  -3  -1   10.88    1.14
  12   3   1    9.04    0.88
 -12  -3  -1    8.53    0.94
 -12  -3  -1    8.73    0.82
  11   3   1   11.49    0.82
 -11  -3  -1   12.93    0.84
 -11  -3  -1   12.55    0.96
  10   3   1   29.49    1.21
 -10  -3  -1   26.11    1.15
 -10  -3  -1   29.01    1.35
   9   3   1    0.68    0.31
  -9  -3  -1    0.34    0.31
  -9  -3  -1    0.71    0.30
   8   3   1    7.76    0.56
  -8  -3  -1    7.20    0.55
  -8  -3  -1    8.21    0.65
   7   3   1    7.74    0.54
  -7  -3  -1    5.94    0.59
  -7  -3  -1    5.82    0.46
   6   3   1   51.36    1.42
  -6  -3  -1   50.49    1.54
  -6  -3  -1   49.30    1.39
   5   3   1    3.79    0.36
  -5  -3  -1    3.83    0.35
  -5  -3  -1    3.36    0.39
   4   3   1   72.13    1.69
  -4  -3  -1   73.52    1.83
  -4  -3  -1   72.39    1.68
   3   3   1   34.00    0.89
  -3  -3  -1   34.07    0.88
  -3  -3  -1   33.80    0.97
   2   3   1   19.18    0.55
  -2  -3  -1   19.55    0.54
  -2  -3  -1   19.37    0.60
   1   3   1   39.18    0.86
   1   3   1   38.01    0.89
  -1  -3  -1   37.66    0.92
  -1  -3  -1   39.18    0.84
   0   3   1    9.76    0.29
   0   3   1    9.06    0.35
   0   3   1    8.75    0.31
   0  -3  -1    9.21    0.27
  -1   3   1    3.53    0.17
  -1   3   1    3.24    0.19
  -1   3   1    2.88    0.22
   1  -3  -1    3.01    0.19
   1  -3  -1    2.93    0.17
   1  -3  -1    3.33    0.16
   1  -3  -1    3.08    0.17
  -2   3   1  280.24    5.35
  -2   3   1  281.83    5.38
   2  -3  -1  281.23    5.36
   2  -3  -1  282.85    5.59
   2  -3  -1  286.11    5.59
  -3   3   1    5.93    0.33
  -3   3   1    6.91    0.29
  -3   3   1    7.06    0.29
   3  -3  -1    6.39    0.31
   3  -3  -1    6.42    0.30
   3  -3  -1    6.48    0.34
  -4   3   1  136.32    2.79
  -4   3   1  134.13    2.77
  -4   3   1  134.49    2.97
   4  -3  -1  136.88    2.82
   4  -3  -1  138.68    2.98
   4  -3  -1  132.04    2.93
  -5   3   1    5.74    0.40
  -5   3   1    6.44    0.35
  -5   3   1    6.35    0.37
   5  -3  -1    6.49    0.38
   5  -3  -1    6.25    0.41
  -6   3   1   84.44    1.96
  -6   3   1   82.50    2.15
  -6   3   1   83.96    1.96
   6  -3  -1   83.91    2.00
   6  -3  -1   84.47    2.11
  -7   3   1   54.64    1.48
  -7   3   1   54.66    1.65
  -7   3   1   55.42    1.47
   7  -3  -1   53.82    1.60
   7  -3  -1   56.12    1.53
  -8   3   1    1.50    0.35
  -8   3   1    2.14    0.34
  -8   3   1    1.98    0.32
   8  -3  -1    2.05    0.37
   8  -3  -1    1.60    0.33
  -9   3   1    6.07    0.57
  -9   3   1    5.96    0.65
  -9   3   1    5.86    0.52
   9  -3  -1    6.82    0.63
 -10   3   1    9.85    0.66
 -10   3   1   11.62    0.82
 -10   3   1   10.50    0.69
  10  -3  -1   10.40    0.72
 -11   3   1    3.81    0.52
 -11   3   1    3.09    0.48
  11  -3  -1    3.78    0.53
 -12   3   1   -0.22    0.23
 -12   3   1   -0.02    0.28
  12  -3  -1    0.06    0.30
 -13   3   1    0.01    0.28
 -13   3   1   -0.29    0.31
  13  -3  -1   -0.54    0.33
 -14   3   1    0.30    0.39
 -14   3   1   -0.52    0.31
  14  -3  -1   -0.28    0.36
  14   4   1    0.82    0.50
 -14  -4  -1    0.57    0.51
  13   4   1    3.29    0.64
 -13  -4  -1    5.06    0.86
 -13  -4  -1    4.28    0.67
  12   4   1   11.61    0.87
 -12  -4  -1   13.38    1.20
 -12  -4  -1   14.13    0.92
  11   4   1   20.32    1.08
 -11  -4  -1   17.79    1.02
 -11  -4  -1   19.71    1.16
  10   4   1    2.75    0.47
 -10  -4  -1    3.90    0.56
 -10  -4  -1    3.18    0.60
   9   4   1    2.59    0.47
  -9  -4  -1    2.09    0.41
  -9  -4  -1    1.90    0.46
   8   4   1   31.41    1.17
  -8  -4  -1   28.85    1.25
  -8  -4  -1   29.14    1.11
   7   4   1    1.17    0.28
  -7  -4  -1    0.78    0.29
  -7  -4  -1    0.87    0.27
   6   4   1    9.14    0.53
  -6  -4  -1   10.00    0.61
  -6  -4  -1    9.94    0.54
   5   4   1  142.88    3.09
  -5  -4  -1  138.79    3.06
  -5  -4  -1  144.72    3.29
   4   4   1  139.04    2.87
  -4  -4  -1  131.01    2.83
  -4  -4  -1  131.92    3.03
   3   4   1   17.63    0.59
  -3  -4  -1   17.34    0.64
  -3  -4  -1   17.18    0.56
   2   4   1   63.56    1.41
   2   4   1   61.91    1.40
  -2  -4  -1   65.64    1.52
  -2  -4  -1   62.23    1.37
   1   4   1  396.71    7.46
   1   4   1  394.25    7.92
  -1  -4  -1  396.33    7.79
  -1  -4  -1  395.36    7.43
   0   4   1  385.73    7.67
   0   4   1  384.99    7.15
   0  -4  -1  366.50    7.46
   0  -4  -1  384.72    7.13
  -1   4   1  111.36    2.47
   1  -4  -1  110.53    2.34
   1  -4  -1  112.62    2.31
   1  -4  -1  110.97    2.19
  -2   4   1    1.44    0.15
  -2   4   1    0.83    0.14
   2  -4  -1    1.58    0.16
   2  -4  -1    1.24    0.16
   2  -4  -1    1.44    0.16
  -3   4   1   19.86    0.64
  -3   4   1   17.81    0.55
  -3   4   1   19.17    0.56
   3  -4  -1   18.69    0.57
   3  -4  -1   20.31    0.63
   3  -4  -1   19.10    0.62
  -4   4   1    6.82    0.34
  -4   4   1    6.96    0.41
  -4   4   1    6.53    0.34
   4  -4  -1    7.02    0.37
   4  -4  -1    6.93    0.39
   4  -4  -1    6.65    0.40
  -5   4   1   36.31    0.99
  -5   4   1   37.10    1.12
  -5   4   1   36.31    0.99
   5  -4  -1   35.94    1.02
   5  -4  -1   36.13    1.09
  -6   4   1   51.66    1.32
  -6   4   1   50.83    1.33
  -6   4   1   50.03    1.47
   6  -4  -1   50.49    1.37
   6  -4  -1   49.87    1.45
  -7   4   1    6.27    0.43
  -7   4   1    5.90    0.48
  -7   4   1    6.92    0.44
   7  -4  -1    5.68    0.46
   7  -4  -1    6.20    0.45
  -8   4   1    0.74    0.25
  -8   4   1    0.75    0.24
  -8   4   1    1.10    0.31
   8  -4  -1    0.80    0.27
   8  -4  -1    1.07    0.31
  -9   4   1   55.69    1.58
  -9   4   1   53.06    1.56
  -9   4   1   53.25    1.79
   9  -4  -1   54.29    1.75
   9  -4  -1   53.60    1.64
 -10   4   1   15.45    0.80
 -10   4   1   14.73    0.94
 -10   4   1   19.19    0.88
  10  -4  -1   17.32    0.92
 -11   4   1    0.72    0.33
 -11   4   1    1.25    0.35
  11  -4  -1    1.05    0.36
 -12   4   1    4.12    0.56
 -12   4   1    3.32    0.51
  12  -4  -1    4.22    0.64
 -13   4   1    0.49    0.36
 -13   4   1    0.09    0.27
  13  -4  -1    0.17    0.42
 -14   4   1    1.59    0.46
  14  -4  -1    1.99    0.52
  14   5   1    0.43    0.44
 -14  -5  -1    0.28    0.40
  13   5   1    2.59    0.62
 -13  -5  -1    1.23    0.51
 -13  -5  -1    2.66    0.62
  12   5   1    8.34    0.85
 -12  -5  -1    9.65    0.90
 -12  -5  -1    9.53    1.02
  11   5   1    7.89    0.81
 -11  -5  -1    9.22    0.97
 -11  -5  -1    6.00    0.68
  10   5   1    1.89    0.44
 -10  -5  -1    0.54    0.41
 -10  -5  -1    0.95    0.36
   9   5   1    1.78    0.42
  -9  -5  -1    0.84    0.37
  -9  -5  -1    0.80    0.32
   8   5   1   16.90    0.86
  -8  -5  -1   16.05    0.91
  -8  -5  -1   17.42    0.85
   7   5   1   22.17    0.92
  -7  -5  -1   23.71    1.03
  -7  -5  -1   22.08    0.57
  -7  -5  -1   23.27    0.93
   6   5   1   72.52    1.89
  -6  -5  -1   76.43    1.91
  -6  -5  -1   73.90    2.07
   5   5   1   18.73    0.75
  -5  -5  -1   19.70    0.83
  -5  -5  -1   19.19    0.73
   4   5   1   13.22    0.55
  -4  -5  -1   13.48    0.63
  -4  -5  -1   12.62    0.53
   3   5   1    1.79    0.23
  -3  -5  -1    1.54    0.20
  -3  -5  -1    1.63    0.27
   2   5   1  120.70    2.57
   2   5   1  124.95    2.52
  -2  -5  -1  116.85    2.65
  -2  -5  -1  121.69    2.47
   1   5   1  149.45    2.98
   1   5   1  148.19    3.15
  -1  -5  -1  149.76    2.95
  -1  -5  -1  149.77    3.15
   0   5   1  139.22    2.75
   0   5   1  140.45    3.00
   0  -5  -1  138.62    2.74
   0  -5  -1  136.71    2.92
  -1   5   1  101.40    2.33
   1  -5  -1  101.89    2.20
   1  -5  -1  100.47    2.17
   1  -5  -1  101.52    2.05
  -2   5   1   14.77    0.47
   2  -5  -1   15.55    0.52
   2  -5  -1   15.51    0.47
   2  -5  -1   14.96    0.53
  -3   5   1    4.89    0.33
  -3   5   1    5.54    0.29
   3  -5  -1    5.54    0.33
   3  -5  -1    6.04    0.34
   3  -5  -1    5.98    0.31
  -4   5   1   40.77    1.15
  -4   5   1   40.29    1.03
  -4   5   1   36.69    1.01
   4  -5  -1   39.38    1.11
   4  -5  -1   40.10    1.13
   4  -5  -1   40.76    1.05
  -5   5   1   46.56    1.18
  -5   5   1   45.10    1.16
  -5   5   1   43.41    1.29
   5  -5  -1   44.25    1.19
   5  -5  -1   42.99    1.27
  -6   5   1    7.67    0.43
  -6   5   1    7.61    0.42
  -6   5   1    7.67    0.52
   6  -5  -1    7.66    0.46
   6  -5  -1    7.89    0.51
  -7   5   1    0.06    0.15
  -7   5   1    0.45    0.20
  -7   5   1    0.30    0.20
   7  -5  -1    0.39    0.22
   7  -5  -1    0.61    0.23
  -8   5   1    3.20    0.38
  -8   5   1    4.21    0.52
  -8   5   1    3.34    0.40
   8  -5  -1    2.71    0.41
   8  -5  -1    3.86    0.48
  -9   5   1   12.45    0.81
  -9   5   1   10.87    0.66
  -9   5   1   12.25    0.65
   9  -5  -1   11.97    0.71
   9  -5  -1   13.72    0.83
 -10   5   1   -0.12    0.24
 -10   5   1    0.23    0.25
 -10   5   1    0.28    0.30
  10  -5  -1   -0.48    0.22
  10  -5  -1    0.27    0.27
 -11   5   1   12.40    0.77
 -11   5   1   12.37    0.75
  11  -5  -1   13.60    0.84
 -12   5   1    0.12    0.32
 -12   5   1    0.64    0.34
  12  -5  -1    0.26    0.32
 -13   5   1   17.86    1.00
 -13   5   1   18.39    1.00
  13  -5  -1   17.88    1.07
 -14   5   1    0.17    0.43
 -14   5   1    0.55    0.37
  14  -5  -1    0.25    0.44
  13   6   1    1.40    0.49
 -13  -6  -1    1.27    0.64
 -13  -6  -1    1.21    0.50
  12   6   1   -0.33    0.35
 -12  -6  -1    0.19    0.40
 -12  -6  -1   -0.38    0.34
  11   6   1    0.42    0.38
 -11  -6  -1    0.45    0.35
 -11  -6  -1    0.50    0.43
  10   6   1    4.92    0.63
 -10  -6  -1    5.88    0.68
 -10  -6  -1    6.69    0.77
   9   6   1   10.51    0.75
  -9  -6  -1   11.19    0.74
  -9  -6  -1   11.22    0.88
   8   6   1    8.38    0.64
  -8  -6  -1    8.29    0.78
  -8  -6  -1    8.29    0.60
   7   6   1    0.38    0.25
  -7  -6  -1    0.28    0.22
  -7  -6  -1    0.26    0.26
   6   6   1    0.84    0.27
  -6  -6  -1    0.66    0.23
  -6  -6  -1    1.18    0.31
   5   6   1   25.59    0.91
  -5  -6  -1   26.51    1.01
  -5  -6  -1   27.03    0.91
   4   6   1   37.92    1.09
  -4  -6  -1   36.97    1.06
  -4  -6  -1   37.29    1.20
   3   6   1    1.80    0.24
  -3  -6  -1    2.05    0.32
  -3  -6  -1    2.52    0.26
   2   6   1    1.99    0.23
   2   6   1    1.86    0.20
  -2  -6  -1    1.52    0.19
  -2  -6  -1    1.89    0.26
   1   6   1    8.35    0.38
   1   6   1    8.33    0.36
  -1  -6  -1    8.22    0.41
  -1  -6  -1    9.15    0.35
   0   6   1   87.70    2.06
   0   6   1   87.52    1.86
   0  -6  -1   89.88    1.85
   0  -6  -1   88.20    2.01
  -1   6   1   20.39    0.74
   1  -6  -1   21.08    0.65
   1  -6  -1   21.31    0.69
   1  -6  -1   20.44    0.58
  -2   6   1    1.88    0.21
  -2   6   1    2.69    0.23
  -2   6   1    2.79    0.33
   2  -6  -1    2.75    0.27
   2  -6  -1    2.66    0.25
   2  -6  -1    2.77    0.22
  -3   6   1    8.30    0.43
  -3   6   1    9.36    0.40
   3  -6  -1    9.05    0.44
   3  -6  -1    9.23    0.45
   3  -6  -1    9.52    0.40
  -4   6   1    6.43    0.41
  -4   6   1    6.36    0.35
   4  -6  -1    6.53    0.40
   4  -6  -1    6.47    0.37
   4  -6  -1    6.29    0.40
  -5   6   1    9.66    0.46
  -5   6   1    8.84    0.52
  -5   6   1    9.26    0.45
   5  -6  -1    9.05    0.47
   5  -6  -1   10.03    0.52
  -6   6   1    8.09    0.52
  -6   6   1    7.95    0.45
  -6   6   1    8.54    0.46
   6  -6  -1    8.15    0.49
   6  -6  -1    7.01    0.48
  -7   6   1    4.87    0.52
  -7   6   1    5.38    0.39
  -7   6   1    5.12    0.40
   7  -6  -1    4.15    0.43
   7  -6  -1    4.83    0.50
  -8   6   1    5.24    0.48
  -8   6   1    5.85    0.60
  -8   6   1    5.18    0.47
   8  -6  -1    5.31    0.57
   8  -6  -1    4.48    0.48
  -9   6   1    9.07    0.60
  -9   6   1    9.83    0.73
  -9   6   1    9.11    0.60
   9  -6  -1   10.75    0.75
   9  -6  -1    9.38    0.66
 -10   6   1    3.61    0.47
 -10   6   1    3.94    0.46
  10  -6  -1    3.88    0.50
  10  -6  -1    3.21    0.52
 -11   6   1   -0.05    0.26
 -11   6   1    0.12    0.24
  11  -6  -1   -0.07    0.31
  11  -6  -1   -0.08    0.29
 -12   6   1    6.11    0.64
 -12   6   1    6.50    0.67
  12  -6  -1    6.13    0.70
 -13   6   1    1.83    0.45
  13  -6  -1    1.56    0.46
  14  -6  -1    0.43    0.45
  13   7   1    1.04    0.44
 -13  -7  -1    0.40    0.41
 -13  -7  -1    1.14    0.54
  12   7   1    1.66    0.46
 -12  -7  -1    1.62    0.58
 -12  -7  -1    1.21    0.52
  11   7   1   10.57    0.82
 -11  -7  -1   10.47    1.04
 -11  -7  -1    9.29    0.87
  10   7   1    6.77    0.71
 -10  -7  -1    6.75    0.70
 -10  -7  -1    7.50    0.87
   9   7   1    1.16    0.39
  -9  -7  -1    0.62    0.39
  -9  -7  -1    1.03    0.35
   8   7   1    4.89    0.57
  -8  -7  -1    4.58    0.57
  -8  -7  -1    4.11    0.60
   7   7   1    5.51    0.54
  -7  -7  -1    5.58    0.54
  -7  -7  -1    6.43    0.68
   6   7   1   32.66    1.12
  -6  -7  -1   32.76    1.24
  -6  -7  -1   31.95    1.10
   5   7   1    1.82    0.28
  -5  -7  -1    2.20    0.35
  -5  -7  -1    1.89    0.30
   4   7   1   61.34    1.59
  -4  -7  -1   62.95    1.73
  -4  -7  -1   61.44    1.56
   3   7   1   38.63    1.06
  -3  -7  -1   35.16    1.14
  -3  -7  -1   35.12    1.00
   2   7   1   23.01    0.73
   2   7   1   23.57    0.72
  -2  -7  -1   23.68    0.83
  -2  -7  -1   23.50    0.71
   1   7   1   44.75    1.11
   1   7   1   43.15    1.13
   1   7   1   43.81    1.17
  -1  -7  -1   44.54    1.22
  -1  -7  -1   44.01    1.07
   0   7   1   26.72    0.85
   0   7   1   26.91    0.73
   0   7   1   21.68    0.72
   0  -7  -1   26.16    0.72
   0  -7  -1   26.58    0.84
  -1   7   1   79.75    2.02
   1  -7  -1   79.43    1.91
   1  -7  -1   82.12    1.88
   1  -7  -1   81.32    1.74
  -2   7   1    3.46    0.39
  -2   7   1    2.67    0.25
   2  -7  -1    3.99    0.30
   2  -7  -1    4.03    0.31
   2  -7  -1    3.24    0.23
  -3   7   1   47.65    1.26
  -3   7   1   47.15    1.45
  -3   7   1   49.14    1.18
   3  -7  -1   45.50    1.28
   3  -7  -1   45.30    1.16
   3  -7  -1   48.46    1.27
  -4   7   1   18.31    0.63
  -4   7   1   19.10    0.72
   4  -7  -1   17.82    0.72
   4  -7  -1   19.24    0.66
  -5   7   1    8.91    0.53
  -5   7   1    9.31    0.46
   5  -7  -1    9.06    0.48
   5  -7  -1    8.73    0.53
  -6   7   1    6.63    0.43
  -6   7   1    6.23    0.49
  -6   7   1    6.93    0.43
   6  -7  -1    5.99    0.45
   6  -7  -1    6.24    0.47
  -7   7   1   43.28    1.25
  -7   7   1   42.85    1.26
  -7   7   1   41.75    1.41
   7  -7  -1   40.69    1.40
   7  -7  -1   42.84    1.31
  -8   7   1    1.16    0.34
  -8   7   1    1.49    0.31
  -8   7   1    1.17    0.29
   8  -7  -1    0.77    0.32
   8  -7  -1    0.67    0.28
  -9   7   1    1.51    0.33
  -9   7   1    0.77    0.28
   9  -7  -1    1.92    0.37
   9  -7  -1    1.37    0.37
 -10   7   1    2.81    0.43
 -10   7   1    2.61    0.41
  10  -7  -1    3.68    0.55
  10  -7  -1    2.52    0.43
 -11   7   1    4.29    0.54
 -11   7   1    4.64    0.56
  11  -7  -1    4.11    0.58
  11  -7  -1    3.80    0.61
 -12   7   1    0.30    0.30
  12  -7  -1   -0.42    0.26
 -13   7   1    2.10    0.72
 -13   7   1    1.67    0.43
  13  -7  -1    3.48    0.60
  13   8   1   -0.01    0.40
 -13  -8  -1    0.86    0.54
 -13  -8  -1   -0.40    0.50
  12   8   1    0.60    0.44
 -12  -8  -1    0.54    0.53
 -12  -8  -1    0.52    0.41
  11   8   1    0.99    0.42
 -11  -8  -1    1.38    0.44
 -11  -8  -1    1.15    0.50
  10   8   1   -0.09    0.27
 -10  -8  -1    0.12    0.34
 -10  -8  -1    0.09    0.30
   9   8   1   -0.24    0.22
  -9  -8  -1    0.22    0.33
  -9  -8  -1    0.14    0.28
   8   8   1   45.18    1.50
  -8  -8  -1   43.89    1.67
  -8  -8  -1   43.37    1.50
   7   8   1    3.20    0.47
  -7  -8  -1    2.49    0.47
  -7  -8  -1    2.38    0.40
   6   8   1    7.54    0.56
  -6  -8  -1    8.02    0.62
  -6  -8  -1    8.20    0.55
   5   8   1   14.39    0.68
  -5  -8  -1   15.36    0.79
  -5  -8  -1   15.66    0.68
   4   8   1    0.45    0.20
  -4  -8  -1    0.26    0.20
  -4  -8  -1    0.20    0.18
   3   8   1   21.58    0.76
   3   8   1   22.13    0.70
  -3  -8  -1   22.76    0.75
  -3  -8  -1   22.61    0.88
   2   8   1   16.25    0.59
   2   8   1   16.56    0.61
  -2  -8  -1   15.13    0.56
  -2  -8  -1   16.36    0.70
   1   8   1   14.12    0.56
   1   8   1   14.45    0.55
   1   8   1   14.29    0.59
  -1  -8  -1   15.82    0.55
  -1  -8  -1   13.55    0.62
   0   8   1   30.97    0.87
   0   8   1   30.86    0.89
   0   8   1   32.45    1.02
   0  -8  -1   32.11    1.01
   0  -8  -1   30.79    0.85
  -1   8   1    3.22    0.29
  -1   8   1    4.79    0.40
  -1   8   1    5.18    0.32
   1  -8  -1    5.16    0.36
   1  -8  -1    5.50    0.30
   1  -8  -1    4.87    0.34
  -2   8   1    0.91    0.25
  -2   8   1    0.94    0.18
   2  -8  -1    1.09    0.19
   2  -8  -1    1.45    0.23
   2  -8  -1    1.21    0.22
  -3   8   1    6.69    0.37
  -3   8   1    6.50    0.41
  -3   8   1    6.25    0.49
   3  -8  -1    6.40    0.36
   3  -8  -1    6.22    0.42
   3  -8  -1    6.91    0.42
  -4   8   1    1.29    0.22
  -4   8   1    0.89    0.23
   4  -8  -1    1.01    0.19
   4  -8  -1    1.31    0.25
  -5   8   1   48.13    1.27
  -5   8   1   47.29    1.40
   5  -8  -1   45.95    1.42
   5  -8  -1   46.68    1.29
  -6   8   1    0.19    0.18
  -6   8   1   -0.07    0.19
   6  -8  -1   -0.03    0.16
   6  -8  -1    0.25    0.23
  -7   8   1    6.03    0.45
  -7   8   1    4.89    0.44
  -7   8   1    5.56    0.56
   7  -8  -1    6.51    0.60
   7  -8  -1    5.88    0.53
  -8   8   1    0.53    0.24
  -8   8   1    0.53    0.26
   8  -8  -1    0.37    0.27
   8  -8  -1    0.07    0.27
  -9   8   1   12.60    0.70
  -9   8   1   11.58    0.67
   9  -8  -1   13.42    0.82
   9  -8  -1   13.21    0.77
 -10   8   1    0.96    0.32
 -10   8   1    1.08    0.32
  10  -8  -1    0.97    0.39
  10  -8  -1    0.73    0.32
 -11   8   1    5.94    0.59
  11  -8  -1    5.23    0.65
  11  -8  -1    5.49    0.73
 -12   8   1   13.98    0.84
 -12   8   1   16.10    1.24
  12  -8  -1   16.46    0.99
  12  -8  -1   17.38    1.11
 -13   8   1   -0.21    0.29
 -13   8   1    0.95    0.55
  13  -8  -1   -0.02    0.38
  13   9   1    2.24    0.59
 -13  -9  -1    1.77    0.61
 -13  -9  -1    1.66    0.67
  12   9   1    0.86    0.45
 -12  -9  -1    0.83    0.45
 -12  -9  -1    0.14    0.51
  11   9   1   -0.14    0.35
 -11  -9  -1    0.49    0.38
 -11  -9  -1    0.69    0.50
  10   9   1    1.21    0.39
 -10  -9  -1    1.52    0.50
 -10  -9  -1    1.53    0.43
   9   9   1   25.19    1.17
  -9  -9  -1   29.32    1.38
  -9  -9  -1   25.78    1.19
   8   9   1    0.27    0.27
  -8  -9  -1    0.10    0.27
  -8  -9  -1    0.58    0.35
   7   9   1   23.95    1.04
  -7  -9  -1   24.58    1.16
  -7  -9  -1   23.81    1.02
   6   9   1    9.58    0.60
  -6  -9  -1   10.19    0.65
  -6  -9  -1   10.29    0.72
   5   9   1    6.08    0.46
  -5  -9  -1    5.90    0.46
  -5  -9  -1    6.52    0.62
   4   9   1   56.77    1.53
  -4  -9  -1   55.14    1.67
  -4  -9  -1   54.35    1.49
   3   9   1    6.23    0.36
   3   9   1    6.03    0.41
  -3  -9  -1    6.41    0.51
  -3  -9  -1    7.38    0.43
   2   9   1    7.41    0.43
   2   9   1    7.46    0.41
  -2  -9  -1    7.67    0.42
  -2  -9  -1    7.44    0.51
   1   9   1    0.24    0.14
   1   9   1    0.46    0.19
   1   9   1    0.44    0.17
  -1  -9  -1    0.80    0.24
  -1  -9  -1    0.48    0.17
   0   9   1   36.80    1.18
   0   9   1   35.56    1.04
   0   9   1   40.11    1.04
   0  -9  -1   38.45    1.19
   0  -9  -1   38.48    1.02
  -1   9   1    5.98    0.36
  -1   9   1    6.42    0.46
   1  -9  -1    6.48    0.36
   1  -9  -1    6.28    0.44
  -2   9   1    0.47    0.16
  -2   9   1    0.75    0.25
   2  -9  -1    0.75    0.20
   2  -9  -1    0.52    0.20
   2  -9  -1    0.62    0.17
  -3   9   1    0.06    0.14
  -3   9   1    0.05    0.22
   3  -9  -1    0.02    0.14
   3  -9  -1   -0.07    0.15
  -4   9   1    2.45    0.32
  -4   9   1    2.46    0.42
  -4   9   1    2.01    0.26
   4  -9  -1    1.97    0.26
   4  -9  -1    1.82    0.30
  -5   9   1   25.04    0.96
  -5   9   1   24.87    1.15
  -5   9   1   26.67    0.86
   5  -9  -1   25.75    0.88
   5  -9  -1   27.31    1.01
  -6   9   1    5.31    0.52
  -6   9   1    5.18    0.41
   6  -9  -1    6.18    0.47
   6  -9  -1    4.92    0.52
  -7   9   1    5.23    0.56
  -7   9   1    5.66    0.43
   7  -9  -1    5.60    0.60
   7  -9  -1    4.68    0.46
  -8   9   1    0.38    0.24
   8  -9  -1    0.18    0.29
   8  -9  -1   -0.23    0.25
  -9   9   1   -0.02    0.21
  -9   9   1    0.18    0.25
   9  -9  -1    0.32    0.30
   9  -9  -1    0.57    0.31
 -10   9   1    6.77    0.60
  10  -9  -1    5.12    0.59
  10  -9  -1    6.03    0.71
 -11   9   1    0.56    0.45
 -11   9   1    0.16    0.29
  11  -9  -1    0.75    0.38
  11  -9  -1    1.32    0.40
 -12   9   1    0.09    0.47
 -12   9   1    0.74    0.35
  12  -9  -1    0.26    0.39
  12  -9  -1    1.36    0.52
 -13   9   1   -0.06    0.57
 -13   9   1   -0.36    0.29
  13  -9  -1    0.12    0.39
  12  10   1    2.58    0.62
 -12 -10  -1    2.75    0.69
 -12 -10  -1    2.37    0.59
  11  10   1    3.69    0.62
 -11 -10  -1    3.64    0.63
 -11 -10  -1    3.82    0.72
  10  10   1   -0.28    0.33
 -10 -10  -1    0.34    0.34
 -10 -10  -1   -0.05    0.44
   9  10   1    0.94    0.33
  -9 -10  -1    0.98    0.37
  -9 -10  -1    1.17    0.42
   8  10   1    0.31    0.31
  -8 -10  -1    0.10    0.39
  -8 -10  -1    0.02    0.34
   7  10   1   17.20    0.86
  -7 -10  -1   16.31    0.97
  -7 -10  -1   17.18    0.90
   6  10   1    0.54    0.28
  -6 -10  -1    1.35    0.40
  -6 -10  -1    0.76    0.31
   5  10   1   25.25    0.98
  -5 -10  -1   25.25    1.12
  -5 -10  -1   24.29    0.95
   4  10   1    1.67    0.31
  -4 -10  -1    1.34    0.37
  -4 -10  -1    1.47    0.27
   3  10   1    7.01    0.40
   3  10   1    6.43    0.44
  -3 -10  -1    6.23    0.51
  -3 -10  -1    6.24    0.41
   2  10   1   21.78    0.77
   2  10   1   21.64    0.78
   2  10   1   21.12    0.77
  -2 -10  -1   21.56    0.76
  -2 -10  -1   19.01    0.86
   1  10   1   42.56    1.17
   1  10   1   44.13    1.29
   1  10   1   42.04    1.20
  -1 -10  -1   42.36    1.16
  -1 -10  -1   41.41    1.32
   0  10   1   14.18    0.68
   0  10   1   14.58    0.59
   0  10   1   14.21    0.59
   0 -10  -1   13.49    0.68
   0 -10  -1   14.54    0.57
  -1  10   1   22.89    0.94
  -1  10   1   22.31    0.75
   1 -10  -1   22.77    0.75
   1 -10  -1   22.06    0.87
  -2  10   1    1.05    0.31
  -2  10   1    0.76    0.17
   2 -10  -1    1.32    0.22
   2 -10  -1    1.18    0.25
  -3  10   1    0.48    0.19
  -3  10   1    0.41    0.27
   3 -10  -1    0.80    0.23
   3 -10  -1    1.18    0.23
  -4  10   1    4.77    0.45
  -4  10   1    4.35    0.56
   4 -10  -1    4.91    0.39
   4 -10  -1    4.99    0.49
  -5  10   1    0.64    0.21
  -5  10   1   -0.11    0.25
  -5  10   1    0.36    0.23
   5 -10  -1    0.44    0.25
   5 -10  -1    0.44    0.20
  -6  10   1    2.22    0.38
  -6  10   1    1.58    0.29
  -6  10   1    1.90    0.47
   6 -10  -1    2.12    0.35
   6 -10  -1    1.30    0.32
  -7  10   1    1.25    0.28
  -7  10   1    0.78    0.39
   7 -10  -1    1.89    0.42
   7 -10  -1    1.60    0.35
  -8  10   1   11.12    0.62
  -8  10   1   11.75    0.94
   8 -10  -1    9.30    0.71
   8 -10  -1    9.44    0.66
  -9  10   1    4.09    0.75
  -9  10   1    5.26    0.51
   9 -10  -1    4.78    0.56
   9 -10  -1    4.63    0.61
 -10  10   1   14.90    1.18
 -10  10   1   13.30    0.73
  10 -10  -1   13.75    0.83
  10 -10  -1   12.93    0.94
 -11  10   1    0.68    0.47
 -11  10   1    0.38    0.29
  11 -10  -1    0.35    0.37
  11 -10  -1    0.30    0.38
 -12  10   1    2.09    0.43
 -12  10   1    2.69    0.74
  12 -10  -1    1.72    0.55
  12 -10  -1    2.45    0.52
  12  11   1    1.00    0.48
 -12 -11  -1    0.29    0.52
 -12 -11  -1    0.38    0.48
  11  11   1    0.01    0.38
 -11 -11  -1    0.29    0.43
 -11 -11  -1    1.19    0.55
  10  11   1    1.32    0.47
 -10 -11  -1    1.43    0.53
 -10 -11  -1    1.16    0.50
   9  11   1    0.21    0.28
  -9 -11  -1    0.11    0.37
  -9 -11  -1    0.12    0.28
   8  11   1    1.52    0.42
  -8 -11  -1    1.61    0.41
  -8 -11  -1    1.28    0.48
   7  11   1   10.93    0.71
  -7 -11  -1   10.92    0.73
  -7 -11  -1   11.36    0.88
   6  11   1   -0.13    0.25
  -6 -11  -1   -0.02    0.28
  -6 -11  -1   -0.05    0.23
   5  11   1   27.81    1.05
  -5 -11  -1   27.25    1.04
  -5 -11  -1   27.84    1.23
   4  11   1    3.37    0.41
  -4 -11  -1    3.25    0.40
  -4 -11  -1    2.68    0.44
   3  11   1   29.44    0.95
   3  11   1   30.61    1.02
  -3 -11  -1   28.44    1.14
  -3 -11  -1   27.71    0.98
   2  11   1   31.39    1.03
   2  11   1   31.14    1.03
   2  11   1   30.34    1.00
  -2 -11  -1   30.25    0.99
  -2 -11  -1   31.44    1.18
   1  11   1   11.25    0.54
   1  11   1   10.74    0.59
   1  11   1    9.66    0.52
  -1 -11  -1   10.55    0.51
  -1 -11  -1   10.13    0.64
   0  11   1   18.10    0.83
   0  11   1   19.84    0.72
   0  11   1   19.48    0.74
   0 -11  -1   20.76    0.90
   0 -11  -1   19.15    0.72
  -1  11   1    0.01    0.16
  -1  11   1    0.76    0.28
  -1  11   1   -0.03    0.13
   1 -11  -1    0.31    0.20
   1 -11  -1    0.32    0.19
  -2  11   1    3.50    0.35
  -2  11   1    3.46    0.47
   2 -11  -1    1.95    0.28
   2 -11  -1    2.80    0.39
  -3  11   1    4.51    0.58
   3 -11  -1    4.67    0.49
   3 -11  -1    3.43    0.36
  -4  11   1    0.58    0.33
  -4  11   1    0.06    0.20
   4 -11  -1   -0.09    0.19
   4 -11  -1    0.20    0.20
  -5  11   1    2.31    0.51
   5 -11  -1    2.55    0.40
   5 -11  -1    2.71    0.36
  -6  11   1    1.83    0.30
  -6  11   1    2.40    0.53
   6 -11  -1    1.67    0.33
   6 -11  -1    2.10    0.39
  -7  11   1    7.28    0.87
  -7  11   1    6.52    0.48
   7 -11  -1    7.74    0.58
   7 -11  -1    8.39    0.76
  -8  11   1    1.56    0.33
  -8  11   1    1.33    0.50
   8 -11  -1    1.75    0.38
   8 -11  -1    1.18    0.36
  -9  11   1    8.78    0.59
  -9  11   1   10.21    1.07
   9 -11  -1   10.49    0.79
   9 -11  -1    9.48    0.67
 -10  11   1   -0.13    0.44
 -10  11   1    1.05    0.31
  10 -11  -1    0.30    0.30
  10 -11  -1    0.45    0.39
 -11  11   1    7.38    0.64
 -11  11   1    8.09    1.11
  11 -11  -1    9.15    0.95
  11 -11  -1    7.35    0.75
 -12  11   1    1.62    0.39
 -12  11   1    2.35    0.73
  12 -11  -1    1.84    0.51
  12 -11  -1    1.83    0.51
  11  12   1    1.42    0.52
 -11 -12  -1    1.67    0.59
 -11 -12  -1    2.30    0.70
  10  12   1    6.80    0.79
 -10 -12  -1    4.66    0.73
 -10 -12  -1    6.49    0.88
   9  12   1    1.30    0.42
  -9 -12  -1    1.25    0.48
  -9 -12  -1    1.15    0.42
   8  12   1    0.10    0.27
  -8 -12  -1   -0.05    0.28
  -8 -12  -1   -0.02    0.32
   7  12   1    4.74    0.58
  -7 -12  -1    2.90    0.47
  -7 -12  -1    3.80    0.61
   6  12   1    0.01    0.26
  -6 -12  -1    0.10    0.32
  -6 -12  -1    0.20    0.30
   5  12   1   10.83    0.67
  -5 -12  -1   10.84    0.69
  -5 -12  -1   10.87    0.82
   4  12   1   24.97    0.97
  -4 -12  -1   23.78    1.14
  -4 -12  -1   22.81    0.94
   3  12   1   -0.17    0.16
   3  12   1    0.08    0.22
   3  12   1    0.10    0.18
  -3 -12  -1   -0.18    0.20
  -3 -12  -1    0.00    0.26
   2  12   1    6.28    0.46
   2  12   1    5.88    0.45
   2  12   1    5.83    0.45
  -2 -12  -1    5.52    0.61
  -2 -12  -1    6.24    0.46
   1  12   1   37.09    1.15
   1  12   1   38.73    1.28
   1  12   1   38.00    1.18
  -1 -12  -1   38.91    1.16
  -1 -12  -1   39.10    1.39
   0  12   1    0.06    0.16
   0  12   1    0.08    0.24
   0  12   1    0.30    0.18
   0 -12  -1   -0.03    0.15
   0 -12  -1    0.36    0.26
  -1  12   1    2.53    0.44
  -1  12   1    2.75    0.33
   1 -12  -1    1.83    0.30
   1 -12  -1    2.00    0.38
  -2  12   1    2.78    0.34
  -2  12   1    1.57    0.41
   2 -12  -1    1.81    0.30
   2 -12  -1    1.87    0.35
  -3  12   1   27.33    1.23
   3 -12  -1   27.90    1.09
   3 -12  -1   27.59    0.94
  -4  12   1    6.85    0.77
   4 -12  -1    5.72    0.58
   4 -12  -1    6.21    0.48
  -5  12   1   10.52    0.86
   5 -12  -1   11.74    0.65
   5 -12  -1   12.74    0.78
  -6  12   1   20.65    1.21
   6 -12  -1   19.17    0.85
   6 -12  -1   19.77    0.98
  -7  12   1   21.76    1.30
  -7  12   1   23.34    0.87
   7 -12  -1   22.93    0.98
   7 -12  -1   24.10    1.13
  -8  12   1    1.13    0.50
  -8  12   1    0.59    0.25
   8 -12  -1    0.62    0.29
   8 -12  -1    0.57    0.38
  -9  12   1   -0.59    0.30
  -9  12   1   -0.11    0.23
   9 -12  -1    0.56    0.38
   9 -12  -1    0.12    0.32
 -10  12   1   -0.03    0.51
 -10  12   1    0.75    0.31
  10 -12  -1    1.07    0.36
  10 -12  -1    1.06    0.43
 -11  12   1    4.31    0.87
 -11  12   1    7.73    0.58
  11 -12  -1    6.41    0.85
  11 -12  -1    7.08    0.76
 -11 -13  -1    1.88    0.55
 -11 -13  -1    3.28    0.73
 -10 -13  -1    9.35    1.11
 -10 -13  -1   10.08    0.98
   9  13   1    1.69    0.46
  -9 -13  -1    1.34    0.54
  -9 -13  -1    1.13    0.47
   8  13   1    4.98    0.61
  -8 -13  -1    5.27    0.78
  -8 -13  -1    5.50    0.70
   7  13   1    1.32    0.40
  -7 -13  -1    1.93    0.49
  -7 -13  -1    2.36    0.46
   6  13   1   12.81    0.78
  -6 -13  -1   13.86    0.98
  -6 -13  -1   13.05    0.82
   5  13   1    1.13    0.34
  -5 -13  -1    0.56    0.28
  -5 -13  -1    0.90    0.37
   4  13   1   41.76    1.37
  -4 -13  -1   41.13    1.38
  -4 -13  -1   43.74    1.62
   3  13   1    0.18    0.20
   3  13   1    0.22    0.22
  -3 -13  -1    0.15    0.34
  -3 -13  -1    0.39    0.25
   2  13   1    5.85    0.52
   2  13   1    5.43    0.45
  -2 -13  -1    5.07    0.59
  -2 -13  -1    4.94    0.48
   1  13   1    8.49    0.54
   1  13   1    6.61    0.54
  -1 -13  -1    6.53    0.47
  -1 -13  -1    6.95    0.68
   0  13   1    1.92    0.31
   0  13   1    1.85    0.39
   0 -13  -1    2.16    0.40
   0 -13  -1    1.69    0.33
  -1  13   1   84.54    2.01
  -1  13   1   79.48    2.34
   1 -13  -1   80.75    2.30
   1 -13  -1   81.07    2.03
  -2  13   1   33.93    1.08
  -2  13   1   34.33    1.39
   2 -13  -1   36.29    1.14
   2 -13  -1   35.35    1.32
  -3  13   1    4.32    0.61
  -3  13   1    4.31    0.42
   3 -13  -1    4.29    0.53
   3 -13  -1    3.91    0.43
  -4  13   1   10.81    0.85
   4 -13  -1   11.23    0.74
   4 -13  -1   10.76    0.60
  -5  13   1    6.40    0.78
   5 -13  -1    5.71    0.54
   5 -13  -1    4.86    0.59
  -6  13   1    6.81    0.85
   6 -13  -1    7.20    0.57
   6 -13  -1    6.74    0.71
  -7  13   1   12.95    1.04
   7 -13  -1   12.97    0.77
   7 -13  -1   11.61    0.86
  -8  13   1   22.16    1.39
   8 -13  -1   21.69    1.02
   8 -13  -1   22.44    1.20
  -9  13   1    0.68    0.27
  -9  13   1    0.84    0.50
   9 -13  -1    1.04    0.45
   9 -13  -1    0.94    0.39
 -10  13   1    0.80    0.52
 -10  13   1    0.48    0.26
  10 -13  -1    0.10    0.28
  10 -13  -1    0.31    0.35
 -11  13   1    0.56    0.28
 -11  13   1    0.81    0.58
  11 -13  -1   -0.12    0.34
  11 -13  -1    1.51    0.53
 -10 -14  -1    0.08    0.43
 -10 -14  -1    0.17    0.45
  -9 -14  -1   12.11    1.07
  -9 -14  -1   14.80    1.31
  -8 -14  -1    0.66    0.43
  -8 -14  -1   -0.17    0.36
   7  14   1   16.46    0.94
  -7 -14  -1   14.68    0.91
  -7 -14  -1   15.32    1.07
   6  14   1    3.28    0.50
  -6 -14  -1    2.59    0.45
  -6 -14  -1    2.02    0.57
   5  14   1    3.36    0.47
  -5 -14  -1    3.76    0.60
  -5 -14  -1    3.92    0.52
   4  14   1    0.42    0.26
  -4 -14  -1    0.73    0.36
  -4 -14  -1    0.21    0.26
   3  14   1    3.15    0.40
   3  14   1    3.03    0.44
  -3 -14  -1    3.06    0.42
  -3 -14  -1    3.59    0.60
   2  14   1   -0.04    0.19
   2  14   1    0.14    0.24
  -2 -14  -1   -0.15    0.30
  -2 -14  -1    0.28    0.25
   1  14   1    2.23    0.39
   1  14   1    2.33    0.36
  -1 -14  -1    1.85    0.35
  -1 -14  -1    1.24    0.36
   0  14   1    2.00    0.33
   0  14   1    2.03    0.43
   0 -14  -1    2.20    0.45
   0 -14  -1    1.75    0.32
  -1  14   1   18.08    0.98
  -1  14   1   18.52    0.77
   1 -14  -1   18.14    0.97
   1 -14  -1   18.80    0.79
  -2  14   1   16.17    0.98
   2 -14  -1   16.52    0.76
   2 -14  -1   16.38    0.91
  -3  14   1   22.24    1.20
   3 -14  -1   23.64    1.08
   3 -14  -1   22.46    0.91
  -4  14   1    8.06    0.86
   4 -14  -1    8.52    0.56
   4 -14  -1    7.74    0.73
  -5  14   1   29.52    1.51
   5 -14  -1   29.11    1.10
   5 -14  -1   30.18    1.29
  -6  14   1    2.57    0.63
   6 -14  -1    3.34    0.45
   6 -14  -1    3.02    0.50
  -7  14   1    7.46    0.95
   7 -14  -1    5.70    0.72
   7 -14  -1    5.86    0.62
  -8  14   1    3.93    0.77
   8 -14  -1    5.67    0.75
   8 -14  -1    5.36    0.62
  -9  14   1    1.41    0.56
   9 -14  -1    0.61    0.39
   9 -14  -1    0.76    0.43
 -10  14   1    3.87    0.86
  10 -14  -1    4.20    0.63
  10 -14  -1    4.19    0.76
  -9 -15  -1    2.33    0.60
  -9 -15  -1    2.14    0.69
  -8 -15  -1    0.60    0.38
  -8 -15  -1    0.47    0.55
  -7 -15  -1   13.13    0.93
  -7 -15  -1   16.09    1.11
  -6 -15  -1    1.01    0.36
  -6 -15  -1    0.70    0.47
  -5 -15  -1    1.53    0.46
  -5 -15  -1    1.70    0.43
  -4 -15  -1    0.11    0.28
  -4 -15  -1    0.16    0.35
  -3 -15  -1    0.18    0.30
  -3 -15  -1    0.98    0.33
   2  15   1    9.39    0.65
  -2 -15  -1   11.25    0.68
  -2 -15  -1   10.85    0.84
   1  15   1   31.73    1.27
  -1 -15  -1   32.03    1.39
  -1 -15  -1   32.63    1.16
   0  15   1    0.03    0.27
   0 -15  -1   -0.07    0.30
   0 -15  -1    0.33    0.24
  -1  15   1    0.36    0.31
   1 -15  -1    0.44    0.27
   1 -15  -1    0.28    0.29
  -2  15   1    2.81    0.55
   2 -15  -1    2.59    0.39
   2 -15  -1    2.70    0.51
  -3  15   1    3.30    0.59
   3 -15  -1    4.04    0.56
   3 -15  -1    2.99    0.42
  -4  15   1   10.45    1.02
   4 -15  -1   12.48    0.72
   4 -15  -1   14.35    0.88
  -5  15   1    1.27    0.47
   5 -15  -1    2.41    0.42
   5 -15  -1    2.14    0.44
  -6  15   1   14.59    1.13
   6 -15  -1   17.01    1.02
   6 -15  -1   15.07    0.81
  -7  15   1    0.53    0.53
   7 -15  -1    0.29    0.32
   7 -15  -1   -0.03    0.31
  -8  15   1   31.05    1.77
   8 -15  -1   33.69    1.36
   8 -15  -1   35.43    1.59
  -9  15   1    1.12    0.68
   9 -15  -1    1.71    0.48
   9 -15  -1    1.68    0.51
  -9 -16  -1    3.88    0.78
  -9 -16  -1    4.85    0.81
  -8 -16  -1   -0.03    0.34
  -8 -16  -1    0.15    0.48
  -7 -16  -1    3.08    0.65
  -7 -16  -1    2.17    0.52
  -6 -16  -1    1.23    0.44
  -6 -16  -1    1.35    0.58
  -5 -16  -1    1.28    0.41
  -5 -16  -1    1.77    0.53
  -4 -16  -1    3.48    0.54
  -4 -16  -1    2.34    0.58
  -3 -16  -1    6.10    0.79
  -3 -16  -1    5.48    0.61
  -2 -16  -1   10.06    0.69
  -2 -16  -1   11.49    0.91
   1  16   1    8.59    0.66
  -1 -16  -1    8.76    0.64
  -1 -16  -1    8.85    0.87
   0  16   1    0.30    0.31
   0 -16  -1    0.53    0.33
   0 -16  -1    0.19    0.22
  -1  16   1   -0.05    0.24
   1 -16  -1    0.28    0.27
   1 -16  -1   -0.19    0.24
  -2  16   1    5.22    0.70
   2 -16  -1    5.00    0.66
   2 -16  -1    5.48    0.55
  -3  16   1   14.60    1.04
   3 -16  -1   12.34    0.74
   3 -16  -1   13.30    0.90
  -4  16   1    0.62    0.42
   4 -16  -1    1.25    0.41
   4 -16  -1    1.11    0.34
  -5  16   1    0.47    0.49
   5 -16  -1   -0.13    0.26
   5 -16  -1   -0.02    0.28
  -6  16   1   -0.30    0.33
   6 -16  -1    0.05    0.33
   6 -16  -1    0.24    0.29
  -7  16   1    0.17    0.46
   7 -16  -1    0.38    0.34
   7 -16  -1    0.41    0.35
  -8  16   1    0.70    0.54
   8 -16  -1    0.74    0.38
   8 -16  -1    1.15    0.46
  -9  16   1    0.64    0.67
   9 -16  -1   -0.27    0.39
   9 -16  -1   -0.29    0.36
  -8 -17  -1    3.71    0.76
  -8 -17  -1    3.83    0.67
  -7 -17  -1    1.34    0.49
  -7 -17  -1    0.24    0.52
  -6 -17  -1    5.79    0.85
  -6 -17  -1    7.23    0.80
  -5 -17  -1    0.62    0.51
  -5 -17  -1    1.59    0.47
  -4 -17  -1    0.26    0.39
  -4 -17  -1   -0.03    0.31
  -3 -17  -1    0.39    0.43
  -3 -17  -1    1.08    0.33
  -2 -17  -1    8.17    0.90
  -2 -17  -1    8.75    0.68
  -1 -17  -1   10.49    0.84
  -1 -17  -1    9.05    0.68
   0  17   1    5.45    0.68
   0 -17  -1    5.62    0.71
   0 -17  -1    4.79    0.56
  -1  17   1    1.23    0.42
   1 -17  -1    0.93    0.32
   1 -17  -1    1.16    0.41
  -2  17   1    0.16    0.37
   2 -17  -1    0.22    0.28
   2 -17  -1    0.75    0.39
  -3  17   1    4.55    0.75
   3 -17  -1    4.54    0.64
   3 -17  -1    4.15    0.52
  -4  17   1    8.97    1.02
   4 -17  -1    8.43    0.74
   4 -17  -1    9.58    0.78
  -5  17   1    1.25    0.55
   5 -17  -1    0.97    0.43
   5 -17  -1    1.01    0.37
  -6  17   1   17.98    1.37
   6 -17  -1   18.34    0.99
   6 -17  -1   18.30    1.11
  -7  17   1    1.66    0.62
   7 -17  -1    0.39    0.42
   7 -17  -1    1.49    0.43
  -8  17   1    0.17    0.61
   8 -17  -1    0.30    0.43
   8 -17  -1    0.80    0.36
  -6 -18  -1    0.49    0.49
  -6 -18  -1    0.54    0.44
  -5 -18  -1    0.09    0.30
  -5 -18  -1    0.16    0.41
  -4 -18  -1    1.24    0.45
  -4 -18  -1    1.89    0.59
  -3 -18  -1    0.64    0.48
  -3 -18  -1   -0.10    0.32
  -2 -18  -1    0.57    0.35
  -2 -18  -1    1.06    0.43
  -1 -18  -1    0.75    0.43
  -1 -18  -1    0.27    0.31
   0 -18  -1    0.16    0.30
   0 -18  -1    0.06    0.39
  -1  18   1    0.12    0.37
   1 -18  -1    0.43    0.33
   1 -18  -1   -0.31    0.27
  -2  18   1    2.17    0.56
   2 -18  -1    1.53    0.48
   2 -18  -1    1.84    0.43
  -3  18   1    0.17    0.34
   3 -18  -1    0.11    0.36
   3 -18  -1    0.32    0.32
  -4  18   1    8.48    1.01
   4 -18  -1    8.31    0.89
   4 -18  -1    9.99    0.75
  -5  18   1    1.67    0.67
   5 -18  -1    2.54    0.49
   5 -18  -1    2.31    0.57
  -6  18   1    4.09    0.82
   6 -18  -1    5.68    0.68
   6 -18  -1    6.45    0.80
  -5 -19  -1    1.17    0.48
  -5 -19  -1    0.51    0.58
  -4 -19  -1    1.02    0.47
  -4 -19  -1    2.32    0.66
  -3 -19  -1   -0.05    0.34
  -3 -19  -1   -0.41    0.42
  -2 -19  -1    6.18    0.86
  -2 -19  -1    4.77    0.63
  -1 -19  -1    0.79    0.38
  -1 -19  -1    0.81    0.48
   0 -19  -1    4.20    0.69
   0 -19  -1    3.88    0.58
  -1  19   1    0.79    0.45
   1 -19  -1    0.49    0.36
   1 -19  -1    0.49    0.39
  -2  19   1   -0.18    0.38
   2 -19  -1    0.21    0.41
   2 -19  -1    0.39    0.34
  -3  19   1    7.41    0.93
   3 -19  -1    7.67    0.76
   3 -19  -1    7.61    0.89
  -4  19   1    0.87    0.52
   4 -19  -1    1.69    0.54
   4 -19  -1    2.12    0.47
  -5  19   1    1.28    0.58
   5 -19  -1    0.62    0.39
   5 -19  -1    0.50    0.45
  -3 -20  -1   -0.07    0.37
  -2 -20  -1   -0.42    0.37
  -2 -20  -1    0.19    0.35
  -1 -20  -1    5.53    0.69
  -1 -20  -1    6.86    0.94
   0 -20  -1    8.90    1.03
   0 -20  -1    8.12    0.80
   1 -20  -1    0.57    0.51
   1 -20  -1    0.50    0.39
   2 -20  -1    6.28    0.71
   2 -20  -1    5.62    0.84
   3 -20  -1    2.16    0.50
   3 -20   2    0.18    0.36
   2 -20   2    0.22    0.40
   2 -20   2    0.11    0.36
   1 -20   2    6.82    0.91
   1 -20   2    5.76    0.72
   0 -20   2    0.28    0.40
   0 -20   2    0.11    0.47
  -1 -20   2   -0.22    0.48
  -1 -20   2    0.44    0.36
  -2 -20   2    1.28    0.45
  -2 -20   2    1.46    0.61
  -3 -20   2   13.66    0.97
   5 -19   2    0.67    0.41
   5 -19   2   -0.07    0.35
  -5  19  -2   -0.40    0.48
   4 -19   2    5.43    0.80
   4 -19   2    4.98    0.65
  -4  19  -2    4.93    0.81
   3 -19   2    0.00    0.33
   3 -19   2    0.39    0.37
  -3  19  -2    1.62    0.58
   2 -19   2    0.36    0.43
   2 -19   2    0.02    0.27
  -2  19  -2    0.86    0.44
   1 -19   2    0.29    0.34
   1 -19   2   -0.22    0.40
   0 -19   2    2.72    0.50
   0 -19   2    2.75    0.61
  -1 -19   2    0.78    0.51
  -1 -19   2    0.75    0.36
  -2 -19   2    6.39    0.90
  -2 -19   2    6.34    0.69
  -3 -19   2    1.25    0.57
  -3 -19   2    1.94    0.49
  -4 -19   2    4.75    0.69
  -4 -19   2    7.26    1.01
  -5 -19   2    2.87    0.62
  -5 -19   2    4.21    0.81
   6 -18   2    3.80    0.57
   6 -18   2    3.43    0.66
  -6  18  -2    2.13    0.71
   5 -18   2    0.45    0.40
   5 -18   2    0.26    0.35
  -5  18  -2   -0.03    0.49
   4 -18   2   17.27    1.16
   4 -18   2   16.63    0.93
  -4  18  -2   18.89    1.25
   3 -18   2   -0.20    0.29
   3 -18   2    0.62    0.40
  -3  18  -2    0.32    0.43
   2 -18   2   -0.45    0.33
   2 -18   2    0.25    0.33
  -2  18  -2    0.23    0.39
   1 -18   2   -0.34    0.37
   1 -18   2   -0.10    0.28
  -1  18  -2    0.22    0.34
   0 -18   2    7.19    0.70
   0 -18   2    5.52    0.80
  -1 -18   2    1.57    0.51
  -1 -18   2    1.38    0.39
  -2 -18   2    8.91    0.81
  -2 -18   2    9.96    1.00
  -3 -18   2    0.37    0.40
  -3 -18   2    1.40    0.45
  -4 -18   2    3.88    0.71
  -4 -18   2    3.84    0.59
  -5 -18   2   -0.21    0.38
  -5 -18   2   -0.06    0.48
  -6 -18   2    0.65    0.56
  -6 -18   2   -0.65    0.33
   8 -17   2    1.87    0.48
   8 -17   2    1.72    0.54
   7 -17   2    5.37    0.66
   7 -17   2    6.22    0.85
  -7  17  -2    6.65    1.02
   6 -17   2    0.03    0.27
   6 -17   2    0.01    0.41
  -6  17  -2    0.14    0.52
   5 -17   2   -0.08    0.35
   5 -17   2   -0.10    0.29
  -5  17  -2    1.16    0.54
   4 -17   2    1.91    0.52
   4 -17   2    0.76    0.37
  -4  17  -2    0.75    0.50
   3 -17   2    0.75    0.40
   3 -17   2    1.22    0.37
  -3  17  -2    0.61    0.40
   2 -17   2    3.59    0.49
   2 -17   2    4.02    0.66
  -2  17  -2    3.59    0.65
   1 -17   2    1.17    0.42
   1 -17   2    0.13    0.29
  -1  17  -2    0.49    0.35
   0 -17   2   -0.32    0.20
   0 -17   2   -0.20    0.36
   0  17  -2    0.10    0.30
  -1 -17   2    4.68    0.56
  -1 -17   2    4.37    0.69
  -2 -17   2    2.36    0.54
  -2 -17   2    3.04    0.50
  -3 -17   2    0.42    0.29
  -3 -17   2   -0.20    0.42
  -4 -17   2    0.64    0.42
  -4 -17   2    0.73    0.36
  -5 -17   2   16.03    1.20
  -5 -17   2   14.85    0.94
  -6 -17   2    8.92    0.89
  -6 -17   2    8.21    0.97
  -7 -17   2    0.88    0.46
  -7 -17   2    0.10    0.53
  -8 -17   2    3.95    0.80
  -8 -17   2    3.87    0.70
   9 -16   2    7.82    0.95
   9 -16   2    8.17    0.80
   8 -16   2    1.95    0.45
   8 -16   2    2.39    0.58
  -8  16  -2    2.13    0.71
   7 -16   2    1.12    0.37
   7 -16   2    0.79    0.48
  -7  16  -2    0.64    0.49
   6 -16   2    0.23    0.29
   6 -16   2   -0.06    0.31
  -6  16  -2   -0.35    0.46
   5 -16   2   13.25    0.96
   5 -16   2   14.32    0.81
  -5  16  -2   12.87    1.22
   4 -16   2    1.44    0.36
   4 -16   2    2.24    0.54
  -4  16  -2    2.40    0.59
   3 -16   2    0.43    0.37
   3 -16   2    0.52    0.30
  -3  16  -2    0.42    0.35
   2 -16   2    3.91    0.52
   2 -16   2    3.65    0.60
  -2  16  -2    3.78    0.62
   1 -16   2    6.03    0.72
   1 -16   2    6.33    0.62
  -1  16  -2    5.19    0.66
   0 -16   2   -0.28    0.27
   0 -16   2    0.27    0.26
   0  16  -2    0.06    0.25
  -1 -16   2    1.01    0.44
  -1 -16   2    1.06    0.33
   1  16  -2    1.85    0.41
  -2 -16   2   -0.01    0.36
  -2 -16   2    0.22    0.29
  -3 -16   2   12.74    0.94
  -3 -16   2   10.14    0.74
  -4 -16   2    1.00    0.45
  -4 -16   2    1.39    0.37
  -5 -16   2   -0.43    0.37
  -5 -16   2   -0.01    0.31
  -6 -16   2    4.67    0.67
  -6 -16   2    4.27    0.74
  -7 -16   2    9.52    0.93
  -7 -16   2   10.13    1.10
  -8 -16   2    5.58    0.75
  -8 -16   2    5.78    0.90
  -9 -16   2   11.15    1.24
  -9 -16   2   12.17    1.14
   9 -15   2    0.93    0.49
   9 -15   2    0.48    0.40
  -9  15  -2    1.33    0.61
   8 -15   2    0.83    0.39
   8 -15   2    0.62    0.46
  -8  15  -2    0.21    0.45
   7 -15   2    1.24    0.48
   7 -15   2    1.72    0.44
  -7  15  -2    2.46    0.63
   6 -15   2   12.99    0.94
   6 -15   2   12.05    0.77
  -6  15  -2    9.88    1.09
   5 -15   2   38.62    1.37
   5 -15   2   39.55    1.61
  -5  15  -2   40.75    1.81
   4 -15   2    0.46    0.29
   4 -15   2    0.54    0.32
  -4  15  -2   -0.35    0.29
   3 -15   2   21.34    1.12
   3 -15   2   23.10    0.97
  -3  15  -2   22.94    1.22
   2 -15   2   -0.24    0.29
   2 -15   2    0.65    0.28
  -2  15  -2    0.62    0.27
  -2  15  -2    0.36    0.35
   1 -15   2    3.41    0.43
   1 -15   2    2.88    0.52
  -1  15  -2    3.14    0.42
  -1  15  -2    4.27    0.59
   0 -15   2   19.61    0.89
   0 -15   2   19.01    1.03
   0  15  -2   18.72    0.85
   0  15  -2   17.90    0.92
  -1 -15   2    0.11    0.23
  -1 -15   2    0.26    0.33
   1  15  -2    0.38    0.26
   1  15  -2    0.48    0.28
  -2 -15   2    5.56    0.72
  -2 -15   2    5.30    0.55
   2  15  -2    6.48    0.61
  -3 -15   2   -0.03    0.27
  -3 -15   2    0.19    0.34
   3  15  -2   -0.13    0.25
  -4 -15   2    3.94    0.53
  -4 -15   2    2.34    0.53
   4  15  -2    3.40    0.49
  -5 -15   2   10.54    0.78
  -5 -15   2   11.31    1.05
   5  15  -2   10.49    0.75
  -6 -15   2   14.51    1.07
  -6 -15   2   10.74    0.79
   6  15  -2    9.34    0.83
  -7 -15   2   14.23    0.98
  -7 -15   2   17.16    1.17
   7  15  -2   15.48    0.96
  -8 -15   2   16.69    1.05
  -8 -15   2   15.30    1.23
  -9 -15   2    1.96    0.59
  -9 -15   2    2.22    0.60
  10 -14   2   -0.51    0.39
  10 -14   2   -0.58    0.31
 -10  14  -2   -0.37    0.24
 -10  14  -2   -0.03    0.49
   9 -14   2    0.90    0.45
   9 -14   2    0.94    0.40
  -9  14  -2    2.16    0.65
  -9  14  -2    1.09    0.34
   8 -14   2   38.74    1.43
   8 -14   2   35.36    1.58
  -8  14  -2   37.19    1.88
  -8  14  -2   37.59    1.31
   7 -14   2    2.67    0.45
   7 -14   2    3.97    0.63
  -7  14  -2    2.73    0.66
   6 -14   2    1.17    0.32
   6 -14   2    2.99    0.53
  -6  14  -2    2.98    0.62
   5 -14   2    0.05    0.25
   5 -14   2   -0.23    0.29
  -5  14  -2    0.81    0.46
   4 -14   2    1.34    0.40
   4 -14   2    0.91    0.31
  -4  14  -2    1.17    0.42
   3 -14   2    3.19    0.43
   3 -14   2    3.33    0.51
  -3  14  -2    3.16    0.54
  -3  14  -2    2.86    0.41
   2 -14   2    0.15    0.25
   2 -14   2   -0.06    0.23
  -2  14  -2    0.32    0.28
  -2  14  -2    0.04    0.21
   1 -14   2    0.27    0.27
   1 -14   2    0.03    0.19
  -1  14  -2    0.80    0.33
  -1  14  -2    0.56    0.26
   0 -14   2   49.17    1.47
   0 -14   2   49.48    1.72
   0  14  -2   48.33    1.61
   0  14  -2   48.39    1.47
  -1 -14   2    8.16    0.58
  -1 -14   2    6.19    0.68
   1  14  -2    7.94    0.57
   1  14  -2    7.35    0.57
  -2 -14   2    2.72    0.40
  -2 -14   2    1.81    0.45
   2  14  -2    3.18    0.44
   2  14  -2    2.21    0.36
  -3 -14   2    4.60    0.65
  -3 -14   2    5.77    0.58
   3  14  -2    5.59    0.56
  -4 -14   2   11.51    0.74
  -4 -14   2   12.58    0.89
   4  14  -2   13.29    0.77
  -5 -14   2    0.74    0.39
  -5 -14   2    0.62    0.28
   5  14  -2   -0.09    0.28
  -6 -14   2    6.99    0.82
  -6 -14   2    6.70    0.71
   6  14  -2    6.96    0.72
  -7 -14   2    1.31    0.52
  -7 -14   2    0.38    0.33
   7  14  -2    0.35    0.34
  -8 -14   2    1.02    0.46
  -8 -14   2    0.52    0.44
   8  14  -2    0.60    0.40
  -9 -14   2    0.99    0.59
  -9 -14   2    0.93    0.48
   9  14  -2    1.19    0.43
 -10 -14   2    1.52    0.56
 -10 -14   2    2.01    0.64
  11 -13   2    0.55    0.48
  11 -13   2    0.37    0.35
 -11  13  -2    0.19    0.61
 -11  13  -2    0.46    0.35
  10 -13   2    1.66    0.53
  10 -13   2    1.45    0.41
 -10  13  -2    0.72    0.34
 -10  13  -2    1.32    0.56
   9 -13   2    1.63    0.44
   9 -13   2    1.45    0.45
  -9  13  -2    0.50    0.50
  -9  13  -2    1.50    0.38
   8 -13   2    2.34    0.46
   8 -13   2    1.51    0.45
  -8  13  -2    0.71    0.47
  -8  13  -2    1.85    0.39
   7 -13   2    0.29    0.30
   7 -13   2    0.43    0.36
  -7  13  -2    0.31    0.26
  -7  13  -2    1.10    0.48
   6 -13   2   17.33    0.99
   6 -13   2   16.30    0.83
  -6  13  -2   14.66    0.77
  -6  13  -2   15.87    1.09
   5 -13   2    5.10    0.63
   5 -13   2    4.88    0.50
  -5  13  -2    5.38    0.73
   4 -13   2   12.50    0.79
   4 -13   2   13.32    0.68
  -4  13  -2   12.79    0.91
   3 -13   2   15.20    0.74
   3 -13   2   14.17    0.85
  -3  13  -2   15.83    0.93
   2 -13   2   24.86    1.10
   2 -13   2   24.48    0.94
  -2  13  -2   24.79    1.16
  -2  13  -2   25.73    0.95
   1 -13   2    2.79    0.39
   1 -13   2    2.40    0.43
  -1  13  -2    2.29    0.37
  -1  13  -2    2.59    0.37
  -1  13  -2    2.76    0.46
   0 -13   2   53.71    1.52
   0 -13   2   49.40    1.71
   0  13  -2   54.40    1.54
   0  13  -2   54.87    1.69
   0  13  -2   54.32    1.58
  -1 -13   2    4.33    0.46
  -1 -13   2    4.30    0.57
   1  13  -2    4.94    0.49
   1  13  -2    3.83    0.44
   1  13  -2    5.56    0.52
  -2 -13   2   15.18    0.93
  -2 -13   2   13.89    0.70
   2  13  -2   13.58    0.74
   2  13  -2   15.56    0.77
   2  13  -2   15.30    0.70
  -3 -13   2   14.98    0.94
  -3 -13   2   15.45    0.76
   3  13  -2   15.24    0.64
   3  13  -2   15.81    0.80
   3  13  -2   16.61    0.81
  -4 -13   2    9.13    0.62
  -4 -13   2   10.74    0.84
   4  13  -2   10.07    0.67
  -5 -13   2    4.45    0.67
  -5 -13   2    3.51    0.48
   5  13  -2    4.54    0.54
  -6 -13   2    4.46    0.68
  -6 -13   2    3.98    0.53
   6  13  -2    3.34    0.50
  -7 -13   2   19.71    1.18
  -7 -13   2   19.62    1.04
   7  13  -2   19.02    1.01
  -8 -13   2    6.18    0.71
  -8 -13   2    5.07    0.79
   8  13  -2    5.06    0.64
  -9 -13   2   11.56    1.02
  -9 -13   2   11.30    1.10
   9  13  -2   11.67    0.89
 -10 -13   2    3.56    0.64
 -10 -13   2    2.06    0.69
  10  13  -2    5.39    0.71
 -11 -13   2    2.16    0.70
 -11 -13   2    0.49    0.46
  11  13  -2    1.09    0.50
  11 -12   2    1.10    0.40
  11 -12   2    0.93    0.48
 -11  12  -2    1.07    0.37
 -11  12  -2    0.90    0.57
  10 -12   2   -0.01    0.33
  10 -12   2   -0.07    0.31
 -10  12  -2   -0.07    0.28
 -10  12  -2   -0.31    0.37
   9 -12   2    6.38    0.65
   9 -12   2    8.20    0.86
  -9  12  -2    7.27    0.95
  -9  12  -2    6.41    0.63
   8 -12   2    0.49    0.34
   8 -12   2    0.51    0.33
  -8  12  -2    0.59    0.43
  -8  12  -2    0.99    0.31
   7 -12   2    1.72    0.38
   7 -12   2    1.75    0.40
  -7  12  -2    1.73    0.51
  -7  12  -2    1.99    0.37
   6 -12   2   12.87    0.85
   6 -12   2   13.75    0.75
  -6  12  -2   12.65    0.70
  -6  12  -2   12.81    0.95
   5 -12   2   30.05    1.07
   5 -12   2   30.57    1.23
  -5  12  -2   29.10    1.38
  -5  12  -2   29.56    1.06
   4 -12   2    8.48    0.56
   4 -12   2    8.16    0.62
  -4  12  -2    9.30    0.61
  -4  12  -2    9.48    0.77
   3 -12   2   12.52    0.74
   3 -12   2   11.29    0.62
  -3  12  -2   11.28    0.78
  -3  12  -2   12.71    0.66
   2 -12   2   53.21    1.45
   2 -12   2   52.52    1.66
  -2  12  -2   50.45    1.69
  -2  12  -2   48.98    1.48
   1 -12   2    0.97    0.25
   1 -12   2    0.24    0.23
  -1  12  -2    0.25    0.22
  -1  12  -2    0.18    0.26
  -1  12  -2    0.28    0.21
   0 -12   2    0.12    0.19
   0 -12   2   -0.07    0.21
   0  12  -2    0.19    0.22
   0  12  -2    0.26    0.20
   0  12  -2   -0.12    0.18
  -1 -12   2    0.08    0.20
  -1 -12   2    0.06    0.22
   1  12  -2    0.18    0.18
   1  12  -2    0.10    0.19
   1  12  -2    0.17    0.20
  -2 -12   2   80.26    2.31
  -2 -12   2   80.49    2.03
   2  12  -2   80.27    2.04
   2  12  -2   82.57    2.15
   2  12  -2   79.69    2.06
  -3 -12   2    4.09    0.55
  -3 -12   2    3.38    0.41
   3  12  -2    3.44    0.42
   3  12  -2    4.24    0.47
   3  12  -2    3.01    0.32
  -4 -12   2   14.25    0.76
  -4 -12   2   14.80    0.89
   4  12  -2   13.36    0.72
  -5 -12   2   72.51    2.04
  -5 -12   2   74.56    2.29
   5  12  -2   71.57    2.05
  -6 -12   2    0.68    0.31
  -6 -12   2    0.38    0.35
   6  12  -2    0.89    0.35
  -7 -12   2   32.51    1.49
  -7 -12   2   32.28    1.32
   7  12  -2   32.60    1.32
  -8 -12   2    0.69    0.42
  -8 -12   2    1.30    0.41
   8  12  -2    0.56    0.33
  -9 -12   2    2.55    0.62
  -9 -12   2    2.45    0.50
   9  12  -2    3.80    0.62
 -10 -12   2    5.28    0.76
 -10 -12   2    6.30    0.89
  10  12  -2    6.35    0.78
 -11 -12   2    0.74    0.61
 -11 -12   2    0.85    0.52
  11  12  -2    0.90    0.48
  12 -11   2    0.53    0.49
  12 -11   2    0.05    0.38
 -12  11  -2    0.45    0.34
 -12  11  -2   -0.48    0.46
  11 -11   2    2.84    0.63
  11 -11   2    2.26    0.48
 -11  11  -2    2.02    0.44
  10 -11   2   19.42    1.01
  10 -11   2   21.06    1.18
 -10  11  -2   20.17    0.98
   9 -11   2    0.96    0.38
   9 -11   2    0.84    0.35
  -9  11  -2    0.87    0.31
   8 -11   2    0.00    0.28
   8 -11   2   -0.16    0.25
  -8  11  -2   -0.49    0.21
   7 -11   2    6.09    0.57
   7 -11   2    6.32    0.68
  -7  11  -2    5.59    0.54
   6 -11   2    0.17    0.22
   6 -11   2    0.21    0.30
  -6  11  -2    0.54    0.27
   5 -11   2    5.03    0.47
   5 -11   2    4.20    0.54
  -5  11  -2    3.76    0.49
  -5  11  -2    5.12    0.50
   4 -11   2    7.89    0.61
   4 -11   2    8.19    0.53
  -4  11  -2    8.38    0.69
  -4  11  -2    7.81    0.52
  -4  11  -2    9.18    0.59
   3 -11   2    8.27    0.60
   3 -11   2    7.50    0.47
  -3  11  -2    7.49    0.72
  -3  11  -2    8.60    0.53
   2 -11   2    2.02    0.30
   2 -11   2    2.21    0.36
  -2  11  -2    2.01    0.31
  -2  11  -2    1.63    0.36
   1 -11   2   46.24    1.49
   1 -11   2   46.67    1.29
  -1  11  -2   46.09    1.35
  -1  11  -2   48.69    1.52
  -1  11  -2   45.40    1.31
   0 -11   2    6.80    0.45
   0 -11   2    7.24    0.56
   0  11  -2    6.37    0.45
   0  11  -2    7.08    0.50
   0  11  -2    7.23    0.46
  -1 -11   2    0.04    0.17
  -1 -11   2   -0.06    0.22
   1  11  -2   -0.23    0.16
   1  11  -2    0.15    0.19
   1  11  -2   -0.05    0.16
  -2 -11   2   10.88    0.67
  -2 -11   2    9.56    0.54
   2  11  -2    9.57    0.50
   2  11  -2   11.02    0.58
   2  11  -2    9.76    0.58
  -3 -11   2   10.41    0.71
  -3 -11   2   10.06    0.56
   3  11  -2   10.37    0.47
   3  11  -2   10.19    0.61
  -4 -11   2   10.35    0.72
  -4 -11   2   11.38    0.62
   4  11  -2   10.67    0.62
  -5 -11   2    2.91    0.44
  -5 -11   2    2.71    0.49
   5  11  -2    3.25    0.46
  -6 -11   2    9.14    0.69
  -6 -11   2    9.82    0.76
   6  11  -2    9.01    0.67
  -7 -11   2    1.20    0.38
  -7 -11   2    0.30    0.41
   7  11  -2    1.15    0.37
  -8 -11   2    1.81    0.50
  -8 -11   2    1.56    0.44
   8  11  -2    1.59    0.40
  -9 -11   2    0.26    0.38
  -9 -11   2    0.89    0.41
   9  11  -2    0.85    0.37
 -10 -11   2    0.41    0.41
 -10 -11   2    0.92    0.48
  10  11  -2    0.31    0.37
 -11 -11   2    0.44    0.45
 -11 -11   2    0.23    0.53
  11  11  -2    0.75    0.44
 -12 -11   2    0.12    0.49
 -12 -11   2    1.10    0.46
  12  11  -2    1.41    0.57
  12 -10   2    0.10    0.36
  12 -10   2    0.37    0.39
 -12  10  -2   -0.23    0.27
  11 -10   2    1.17    0.45
  11 -10   2    1.00    0.43
 -11  10  -2    1.42    0.43
  10 -10   2    6.58    0.76
  10 -10   2    6.34    0.68
 -10  10  -2    7.95    0.70
   9 -10   2   13.03    0.81
   9 -10   2   11.30    0.83
  -9  10  -2   13.44    0.76
   8 -10   2    4.90    0.54
   8 -10   2    4.39    0.59
  -8  10  -2    4.45    0.50
   7 -10   2    7.29    0.54
   7 -10   2    5.92    0.63
  -7  10  -2    7.24    0.54
   6 -10   2    0.08    0.23
   6 -10   2    0.10    0.24
  -6  10  -2   -0.09    0.25
  -6  10  -2    0.07    0.21
   5 -10   2    7.57    0.51
   5 -10   2    7.56    0.56
  -5  10  -2    7.08    0.50
  -5  10  -2    9.20    0.61
   4 -10   2   12.72    0.60
   4 -10   2   12.43    0.69
  -4  10  -2   14.09    0.70
  -4  10  -2   12.71    0.63
   3 -10   2   29.10    1.05
   3 -10   2   26.98    0.90
  -3  10  -2   28.38    0.97
  -3  10  -2   26.61    0.93
   2 -10   2   19.75    0.86
   2 -10   2   21.61    0.76
  -2  10  -2   19.68    0.76
  -2  10  -2   20.18    0.90
   1 -10   2   10.29    0.50
   1 -10   2   11.05    0.63
  -1  10  -2   10.99    0.63
  -1  10  -2    9.78    0.52
   0 -10   2   34.59    1.02
   0 -10   2   33.12    1.18
   0  10  -2   34.43    1.08
   0  10  -2   33.72    1.04
   0  10  -2   34.44    1.12
  -1 -10   2    0.12    0.14
  -1 -10   2    0.38    0.23
   1  10  -2    0.04    0.15
   1  10  -2   -0.07    0.15
   1  10  -2    0.22    0.18
  -2 -10   2   18.98    0.86
  -2 -10   2   18.64    0.72
   2  10  -2   18.71    0.67
   2  10  -2   17.91    0.75
   2  10  -2   19.12    0.76
  -3 -10   2    0.17    0.23
  -3 -10   2    0.18    0.18
   3  10  -2    0.49    0.23
   3  10  -2    0.35    0.14
  -4 -10   2   12.05    0.73
  -4 -10   2   11.98    0.62
   4  10  -2   11.74    0.64
  -5 -10   2    8.15    0.55
  -5 -10   2    7.71    0.73
   5  10  -2    7.79    0.56
  -6 -10   2   12.63    0.83
  -6 -10   2   13.39    0.76
   6  10  -2   13.22    0.75
  -7 -10   2    0.35    0.40
  -7 -10   2    0.37    0.27
   7  10  -2    0.30    0.31
  -8 -10   2    2.79    0.47
  -8 -10   2    3.34    0.60
   8  10  -2    2.53    0.46
  -9 -10   2    0.28    0.36
  -9 -10   2    0.27    0.35
   9  10  -2    0.19    0.31
 -10 -10   2    2.10    0.50
 -10 -10   2    1.62    0.52
  10  10  -2    1.53    0.48
 -11 -10   2    0.44    0.38
 -11 -10   2   -0.05    0.50
  11  10  -2    0.74    0.44
 -12 -10   2    2.50    0.67
 -12 -10   2    2.14    0.57
  12  10  -2    1.78    0.59
  13  -9   2    0.46    0.37
  13  -9   2    0.82    0.45
  12  -9   2    0.50    0.39
  12  -9   2    0.26    0.35
 -12   9  -2   -0.11    0.30
  11  -9   2    0.68    0.40
  11  -9   2    2.37    0.55
 -11   9  -2    1.41    0.43
 -11   9  -2    1.77    0.43
  10  -9   2    0.57    0.32
  10  -9   2    0.46    0.32
 -10   9  -2    0.89    0.31
 -10   9  -2    0.50    0.32
   9  -9   2   15.02    0.93
   9  -9   2   13.09    0.80
  -9   9  -2   15.70    0.81
  -9   9  -2   13.61    0.78
   8  -9   2   21.89    1.08
   8  -9   2   21.44    0.94
  -8   9  -2   20.46    0.92
  -8   9  -2   22.19    0.95
   7  -9   2   11.03    0.72
   7  -9   2   10.38    0.63
  -7   9  -2   10.29    0.71
  -7   9  -2    9.55    0.61
   6  -9   2   21.41    0.98
   6  -9   2   23.03    0.88
  -6   9  -2   20.31    0.93
  -6   9  -2   21.07    0.84
   5  -9   2   12.80    0.61
   5  -9   2   13.51    0.71
  -5   9  -2   13.18    0.64
  -5   9  -2   13.96    0.71
   4  -9   2    3.15    0.33
   4  -9   2    4.22    0.45
  -4   9  -2    5.16    0.48
  -4   9  -2    3.68    0.38
   3  -9   2    0.41    0.19
   3  -9   2    0.44    0.18
  -3   9  -2    0.36    0.19
  -3   9  -2    0.53    0.18
   2  -9   2    6.13    0.46
   2  -9   2    6.13    0.36
  -2   9  -2    6.06    0.41
  -2   9  -2    6.31    0.47
  -2   9  -2    6.88    0.42
   1  -9   2  117.16    2.77
   1  -9   2  115.22    2.51
  -1   9  -2  114.26    2.63
  -1   9  -2  116.32    2.81
   0  -9   2  143.46    3.04
   0  -9   2  144.88    3.33
   0   9  -2  145.87    3.20
   0   9  -2  144.79    3.30
   0   9  -2  141.90    3.08
  -1  -9   2   42.88    1.15
  -1  -9   2   43.23    1.33
   1   9  -2   41.51    1.23
   1   9  -2   41.90    1.18
   1   9  -2   42.56    1.19
  -2  -9   2    0.55    0.21
  -2  -9   2    0.21    0.15
   2   9  -2    0.11    0.15
   2   9  -2    0.43    0.15
  -3  -9   2   15.82    0.65
  -3  -9   2   17.72    0.81
   3   9  -2   16.56    0.71
   3   9  -2   16.85    0.54
  -4  -9   2   67.06    1.93
  -4  -9   2   66.78    1.73
   4   9  -2   67.54    1.78
  -5  -9   2   16.57    0.75
  -5  -9   2   17.04    0.87
   5   9  -2   16.27    0.79
  -6  -9   2    2.32    0.46
  -6  -9   2    1.90    0.37
   6   9  -2    1.55    0.34
  -7  -9   2   16.36    0.94
  -7  -9   2   14.33    0.79
   7   9  -2   16.85    0.88
  -8  -9   2   29.50    1.21
  -8  -9   2   30.79    1.40
   8   9  -2   30.32    1.24
  -9  -9   2   15.56    1.00
  -9  -9   2   13.15    0.87
   9   9  -2   12.57    0.82
 -10  -9   2    1.62    0.43
 -10  -9   2    1.50    0.52
  10   9  -2    2.32    0.53
 -11  -9   2   15.48    1.16
 -11  -9   2   14.98    1.03
  11   9  -2   14.05    0.98
 -12  -9   2    0.56    0.46
 -12  -9   2    0.46    0.39
  12   9  -2    0.35    0.42
 -13  -9   2    1.04    0.47
 -13  -9   2    0.12    0.54
  13   9  -2    0.18    0.47
  13  -8   2    5.57    0.76
 -13   8  -2    4.76    0.65
  12  -8   2    3.98    0.66
  12  -8   2    4.57    0.65
 -12   8  -2    3.91    0.58
  11  -8   2    5.55    0.71
  11  -8   2    4.71    0.63
 -11   8  -2    4.57    0.57
 -11   8  -2    5.40    0.62
  10  -8   2    0.18    0.30
  10  -8   2    0.42    0.34
 -10   8  -2    0.58    0.32
 -10   8  -2    0.95    0.33
   9  -8   2    0.43    0.34
   9  -8   2    1.01    0.37
  -9   8  -2    0.48    0.30
  -9   8  -2    0.34    0.26
   8  -8   2    1.63    0.39
   8  -8   2    2.12    0.37
  -8   8  -2    2.16    0.38
  -8   8  -2    1.96    0.36
  -8   8  -2    2.33    0.48
   7  -8   2   17.58    0.87
   7  -8   2   16.24    0.78
  -7   8  -2   16.96    0.90
  -7   8  -2   16.87    0.76
  -7   8  -2   18.66    0.81
   6  -8   2   35.54    1.27
   6  -8   2   37.27    1.17
  -6   8  -2   37.28    1.17
  -6   8  -2   35.68    1.15
  -6   8  -2   36.25    1.29
   5  -8   2    0.31    0.20
   5  -8   2    0.05    0.15
  -5   8  -2   -0.29    0.16
  -5   8  -2    0.14    0.19
   4  -8   2   24.93    0.82
   4  -8   2   24.27    0.92
  -4   8  -2   24.59    0.91
  -4   8  -2   23.69    0.83
   3  -8   2    3.12    0.36
   3  -8   2    3.13    0.31
  -3   8  -2    3.42    0.35
  -3   8  -2    2.90    0.32
   2  -8   2   76.91    1.79
   2  -8   2   81.25    2.00
  -2   8  -2   79.33    1.87
  -2   8  -2   78.56    1.90
   1  -8   2   33.01    0.92
   1  -8   2   33.03    1.06
  -1   8  -2   32.75    0.98
  -1   8  -2   33.44    1.08
   0  -8   2    2.55    0.26
   0  -8   2    2.16    0.30
   0   8  -2    2.51    0.29
   0   8  -2    2.57    0.29
   0   8  -2    2.27    0.27
  -1  -8   2  123.84    2.62
  -1  -8   2  124.59    2.87
   1   8  -2  120.26    2.75
   1   8  -2  122.54    2.74
   1   8  -2  122.68    2.66
  -2  -8   2   19.43    0.80
  -2  -8   2   19.34    0.68
   2   8  -2   20.69    0.64
   2   8  -2   20.03    0.71
  -3  -8   2   10.97    0.63
  -3  -8   2   10.70    0.50
   3   8  -2   10.54    0.53
   3   8  -2   10.92    0.38
  -4  -8   2   49.66    1.35
  -4  -8   2   48.94    1.51
   4   8  -2   47.47    1.37
  -5  -8   2    2.35    0.33
  -5  -8   2    2.35    0.37
   5   8  -2    1.83    0.31
  -6  -8   2    2.25    0.42
  -6  -8   2    2.18    0.36
   6   8  -2    1.94    0.35
  -7  -8   2    0.19    0.28
  -7  -8   2    0.02    0.21
   7   8  -2    0.25    0.27
  -8  -8   2    1.14    0.39
  -8  -8   2    1.49    0.38
   8   8  -2    1.44    0.38
  -9  -8   2    6.85    0.79
  -9  -8   2    5.71    0.64
   9   8  -2    5.59    0.64
 -10  -8   2    8.80    0.91
 -10  -8   2   11.22    0.84
  10   8  -2   11.19    0.85
 -11  -8   2    1.11    0.53
 -11  -8   2    1.86    0.48
  11   8  -2    2.83    0.60
 -12  -8   2    2.33    0.53
 -12  -8   2    1.63    0.61
  12   8  -2    3.13    0.64
 -13  -8   2    6.65    0.92
 -13  -8   2    5.45    0.77
  13   8  -2    3.03    0.67
  13  -7   2   -0.67    0.35
 -13   7  -2    0.86    0.42
  12  -7   2    6.55    0.74
  12  -7   2    7.59    0.87
 -12   7  -2    7.74    0.74
 -12   7  -2    5.99    0.67
  11  -7   2    6.83    0.78
  11  -7   2    7.63    0.73
 -11   7  -2    7.15    0.68
 -11   7  -2    6.18    0.65
  10  -7   2    0.99    0.34
  10  -7   2    0.46    0.32
 -10   7  -2    0.47    0.29
 -10   7  -2    0.99    0.32
   9  -7   2   -0.09    0.28
   9  -7   2    0.54    0.30
  -9   7  -2   -0.14    0.23
  -9   7  -2    0.49    0.28
  -9   7  -2    0.15    0.26
   8  -7   2    6.68    0.61
   8  -7   2    7.91    0.62
  -8   7  -2    8.19    0.56
  -8   7  -2    7.51    0.54
  -8   7  -2    7.97    0.64
   7  -7   2    0.71    0.31
   7  -7   2    0.66    0.24
  -7   7  -2    0.47    0.28
  -7   7  -2    0.43    0.20
  -7   7  -2    0.61    0.24
   6  -7   2    0.33    0.18
   6  -7   2    0.03    0.22
  -6   7  -2    0.01    0.23
  -6   7  -2    0.16    0.19
  -6   7  -2    0.12    0.19
   5  -7   2    3.05    0.39
   5  -7   2    3.82    0.36
  -5   7  -2    2.78    0.33
  -5   7  -2    3.40    0.35
  -5   7  -2    4.13    0.44
   4  -7   2   10.95    0.50
   4  -7   2   10.48    0.55
  -4   7  -2   10.33    0.50
  -4   7  -2   10.32    0.56
   3  -7   2    5.55    0.33
   3  -7   2    4.93    0.38
  -3   7  -2    4.65    0.33
  -3   7  -2    4.98    0.37
   2  -7   2    1.42    0.21
   2  -7   2    1.47    0.24
  -2   7  -2    1.45    0.23
  -2   7  -2    1.78    0.25
   1  -7   2   21.06    0.77
   1  -7   2   21.67    0.66
  -1   7  -2   21.89    0.72
  -1   7  -2   21.59    0.72
   0  -7   2   18.96    0.60
   0  -7   2   17.72    0.69
   0   7  -2   17.16    0.64
   0   7  -2   18.98    0.66
   0   7  -2   17.78    0.62
  -1  -7   2    4.45    0.30
  -1  -7   2    4.85    0.39
   1   7  -2    4.93    0.33
   1   7  -2    4.54    0.29
  -2  -7   2   26.15    0.78
  -2  -7   2   25.68    0.90
   2   7  -2   26.80    0.72
   2   7  -2   26.02    0.82
  -3  -7   2   -0.09    0.18
  -3  -7   2    0.03    0.14
   3   7  -2   -0.05    0.14
  -4  -7   2   15.28    0.64
  -4  -7   2   15.31    0.72
   4   7  -2   16.21    0.68
  -5  -7   2   10.72    0.55
  -5  -7   2   10.38    0.63
   5   7  -2   10.77    0.58
  -6  -7   2    6.77    0.49
  -6  -7   2    6.03    0.58
   6   7  -2    6.52    0.49
  -7  -7   2   12.23    0.81
  -7  -7   2   12.08    0.71
   7   7  -2   12.53    0.73
  -8  -7   2   48.62    1.25
  -8  -7   2   49.69    1.76
  -8  -7   2   49.64    1.60
   8   7  -2   46.64    1.58
  -9  -7   2   -0.16    0.28
  -9  -7   2    0.01    0.31
   9   7  -2    0.54    0.32
 -10  -7   2    0.18    0.35
 -10  -7   2    0.63    0.38
  10   7  -2    0.85    0.39
 -11  -7   2    0.06    0.38
 -11  -7   2   -0.08    0.29
  11   7  -2    0.07    0.37
 -12  -7   2    5.57    0.74
 -12  -7   2    6.20    0.84
  12   7  -2    6.32    0.78
 -13  -7   2   -0.51    0.47
 -13  -7   2    0.64    0.48
  13   7  -2    0.14    0.43
  13  -6   2    0.09    0.35
 -13   6  -2   -0.04    0.34
 -13   6  -2   -0.15    0.30
  12  -6   2    1.37    0.44
 -12   6  -2    2.06    0.44
 -12   6  -2    2.37    0.46
  11  -6   2   -0.20    0.25
  11  -6   2    0.30    0.31
 -11   6  -2   -0.01    0.29
 -11   6  -2    0.54    0.33
  10  -6   2    5.39    0.65
  10  -6   2    6.88    0.67
 -10   6  -2    6.58    0.62
 -10   6  -2    5.51    0.59
 -10   6  -2    7.11    0.76
   9  -6   2    3.82    0.51
   9  -6   2    3.64    0.52
  -9   6  -2    4.07    0.49
  -9   6  -2    3.37    0.52
  -9   6  -2    4.10    0.49
   8  -6   2    2.44    0.38
   8  -6   2    3.08    0.48
  -8   6  -2    2.87    0.40
  -8   6  -2    2.62    0.47
  -8   6  -2    2.88    0.40
   7  -6   2   17.96    0.86
   7  -6   2   18.19    0.77
  -7   6  -2   17.22    0.86
  -7   6  -2   17.63    0.76
  -7   6  -2   16.46    0.73
   6  -6   2    5.61    0.41
   6  -6   2    5.57    0.45
  -6   6  -2    6.30    0.49
  -6   6  -2    6.33    0.41
  -6   6  -2    5.79    0.42
   5  -6   2    2.91    0.32
   5  -6   2    2.21    0.32
  -5   6  -2    2.80    0.37
  -5   6  -2    2.47    0.30
  -5   6  -2    3.15    0.33
   4  -6   2   11.53    0.56
   4  -6   2   11.40    0.50
  -4   6  -2   12.03    0.52
  -4   6  -2   10.92    0.50
  -4   6  -2   10.38    0.55
   3  -6   2  355.08    7.17
   3  -6   2  351.93    6.82
  -3   6  -2  345.47    7.13
  -3   6  -2  359.52    6.91
   2  -6   2    1.50    0.22
   2  -6   2    1.19    0.18
  -2   6  -2    1.73    0.23
  -2   6  -2    1.51    0.22
   1  -6   2   26.61    0.72
   1  -6   2   27.16    0.80
   1  -6   2   25.85    0.83
  -1   6  -2   26.05    0.78
  -1   6  -2   26.05    0.78
   0  -6   2  143.19    2.86
   0  -6   2  138.35    3.08
   0   6  -2  138.79    3.01
   0   6  -2  144.33    3.07
  -1  -6   2    6.76    0.39
  -1  -6   2    6.50    0.32
   1   6  -2    6.32    0.30
   1   6  -2    6.71    0.35
  -2  -6   2    7.97    0.45
  -2  -6   2    8.13    0.37
   2   6  -2    7.97    0.30
   2   6  -2    9.09    0.42
  -3  -6   2   17.06    0.44
  -3  -6   2   16.36    0.59
  -3  -6   2   16.31    0.69
   3   6  -2   16.91    0.64
  -4  -6   2    0.69    0.10
  -4  -6   2    0.80    0.19
  -4  -6   2    0.72    0.22
   4   6  -2    0.96    0.21
  -5  -6   2   35.16    1.10
  -5  -6   2   37.00    1.24
   5   6  -2   37.25    1.15
  -6  -6   2    2.71    0.41
  -6  -6   2    3.47    0.40
   6   6  -2    3.21    0.39
  -7  -6   2    3.53    0.25
  -7  -6   2    4.36    0.53
  -7  -6   2    3.86    0.44
   7   6  -2    4.11    0.49
  -8  -6   2   13.86    0.86
  -8  -6   2   13.31    0.47
  -8  -6   2   13.89    0.76
   8   6  -2   12.33    0.74
  -9  -6   2   17.25    0.93
  -9  -6   2   16.96    1.01
   9   6  -2   18.01    0.93
 -10  -6   2    4.40    0.58
 -10  -6   2    4.06    0.64
  10   6  -2    5.73    0.66
 -11  -6   2    5.76    0.69
 -11  -6   2    6.00    0.84
  11   6  -2    6.01    0.70
 -12  -6   2    0.81    0.40
 -12  -6   2    0.51    0.44
  12   6  -2    0.02    0.40
 -13  -6   2    0.86    0.44
 -13  -6   2    1.11    0.55
  13   6  -2    2.15    0.58
 -14  -6   2    0.17    0.40
  14   6  -2   -0.12    0.41
  14  -5   2    0.05    0.43
 -14   5  -2    0.69    0.42
 -14   5  -2   -0.32    0.35
  13  -5   2    0.01    0.31
 -13   5  -2   -0.04    0.33
 -13   5  -2   -0.35    0.32
  12  -5   2    0.22    0.32
 -12   5  -2    0.32    0.34
 -12   5  -2    0.39    0.34
  11  -5   2    0.25    0.28
 -11   5  -2    0.11    0.28
 -11   5  -2    0.74    0.33
  10  -5   2    2.85    0.53
  10  -5   2    2.80    0.45
 -10   5  -2    2.65    0.45
 -10   5  -2    2.44    0.43
 -10   5  -2    3.60    0.55
   9  -5   2    8.35    0.65
   9  -5   2    8.14    0.61
  -9   5  -2    7.89    0.56
  -9   5  -2    8.38    0.77
  -9   5  -2    7.53    0.57
   8  -5   2    9.16    0.64
   8  -5   2    8.59    0.58
  -8   5  -2    9.92    0.60
  -8   5  -2   10.25    0.60
  -8   5  -2    9.59    0.68
   7  -5   2   68.75    1.80
   7  -5   2   68.48    1.94
  -7   5  -2   69.05    1.99
  -7   5  -2   69.93    1.79
  -7   5  -2   66.79    1.78
   6  -5   2    0.02    0.16
   6  -5   2   -0.02    0.15
  -6   5  -2    0.12    0.18
  -6   5  -2    0.16    0.16
  -6   5  -2    0.19    0.15
   5  -5   2   30.64    1.02
   5  -5   2   32.06    0.95
  -5   5  -2   30.54    0.94
  -5   5  -2   30.14    0.93
  -5   5  -2   30.72    1.05
   4  -5   2   44.98    1.17
   4  -5   2   45.96    1.29
  -4   5  -2   45.46    1.17
  -4   5  -2   46.13    1.30
  -4   5  -2   45.93    1.19
   3  -5   2   15.42    0.59
   3  -5   2   14.78    0.52
  -3   5  -2   14.72    0.54
  -3   5  -2   14.23    0.57
  -3   5  -2   14.73    0.54
   2  -5   2   86.94    1.95
   2  -5   2   88.35    1.84
   2  -5   2   85.45    1.98
  -2   5  -2   86.51    1.89
  -2   5  -2   85.20    1.94
   1  -5   2   17.27    0.51
   1  -5   2   17.26    0.57
   1  -5   2   17.18    0.59
  -1   5  -2   17.21    0.56
  -1   5  -2   16.75    0.55
   0  -5   2    7.08    0.37
   0  -5   2    7.15    0.29
   0   5  -2    6.53    0.33
  -1  -5   2   14.40    0.46
  -1  -5   2   14.99    0.56
   1   5  -2   14.88    0.49
   1   5  -2   14.58    0.45
  -2  -5   2   63.30    1.42
  -2  -5   2   63.26    1.57
   2   5  -2   62.27    1.46
   2   5  -2   63.16    1.35
  -3  -5   2   16.25    0.40
  -3  -5   2   15.10    0.56
  -3  -5   2   16.42    0.66
   3   5  -2   15.64    0.59
  -4  -5   2    0.24    0.14
  -4  -5   2    0.18    0.18
   4   5  -2    0.20    0.16
  -5  -5   2   -0.01    0.18
  -5  -5   2    0.40    0.19
   5   5  -2    0.38    0.19
  -6  -5   2   17.11    0.73
  -6  -5   2   16.85    0.82
   6   5  -2   16.67    0.74
  -7  -5   2   12.87    0.76
  -7  -5   2   12.73    0.45
  -7  -5   2   13.41    0.68
   7   5  -2   13.34    0.70
  -8  -5   2   49.67    1.72
  -8  -5   2   52.28    1.58
   8   5  -2   50.15    1.60
  -9  -5   2    4.83    0.63
  -9  -5   2    4.87    0.56
   9   5  -2    4.95    0.57
 -10  -5   2   35.31    1.51
 -10  -5   2   33.00    1.34
  10   5  -2   31.11    1.33
 -11  -5   2   16.75    0.98
 -11  -5   2   17.23    1.15
  11   5  -2   18.18    1.03
 -12  -5   2   -0.01    0.38
 -12  -5   2    0.22    0.47
  12   5  -2    0.26    0.32
 -13  -5   2    0.84    0.47
 -13  -5   2    1.54    0.55
  13   5  -2    1.70    0.51
 -14  -5   2   10.32    1.01
  14   5  -2    9.58    1.01
  14  -4   2    1.06    0.48
 -14   4  -2    0.50    0.40
 -14   4  -2    0.71    0.42
  13  -4   2    0.23    0.34
 -13   4  -2    0.64    0.40
 -13   4  -2    1.06    0.43
  12  -4   2    5.25    0.68
 -12   4  -2    5.04    0.63
 -12   4  -2    5.26    0.64
  11  -4   2   13.97    0.89
 -11   4  -2   13.69    0.82
 -11   4  -2   14.02    0.84
 -11   4  -2   14.46    0.97
  10  -4   2   39.79    1.43
 -10   4  -2   40.92    1.39
 -10   4  -2   41.05    1.63
 -10   4  -2   39.09    1.39
   9  -4   2    3.66    0.47
   9  -4   2    4.22    0.56
  -9   4  -2    4.34    0.49
  -9   4  -2    3.72    0.55
  -9   4  -2    3.24    0.44
   8  -4   2    8.08    0.58
   8  -4   2    7.03    0.56
  -8   4  -2    6.44    0.47
  -8   4  -2    8.16    0.54
  -8   4  -2    7.02    0.68
   7  -4   2   10.68    0.63
   7  -4   2   10.38    0.60
  -7   4  -2    9.33    0.62
  -7   4  -2   11.26    0.56
  -7   4  -2   10.31    0.54
   6  -4   2   60.31    1.55
   6  -4   2   58.73    1.65
  -6   4  -2   58.89    1.52
  -6   4  -2   57.99    1.53
  -6   4  -2   60.05    1.71
   5  -4   2    4.80    0.35
   5  -4   2    5.71    0.41
  -5   4  -2    5.36    0.36
  -5   4  -2    5.25    0.34
  -5   4  -2    5.72    0.43
   4  -4   2    7.98    0.45
   4  -4   2    7.67    0.40
  -4   4  -2    8.01    0.40
  -4   4  -2    8.21    0.39
  -4   4  -2    7.65    0.46
   3  -4   2   19.98    0.67
   3  -4   2   18.86    0.59
  -3   4  -2   19.75    0.61
  -3   4  -2   19.85    0.67
  -3   4  -2   20.10    0.62
   2  -4   2   35.14    0.86
   2  -4   2   34.85    0.94
   2  -4   2   36.52    0.93
  -2   4  -2   36.08    0.90
  -2   4  -2   35.24    0.92
   1  -4   2  205.33    4.20
   1  -4   2  209.77    3.97
   1  -4   2  206.04    4.17
  -1   4  -2  204.21    4.16
  -1   4  -2  203.28    4.04
   0  -4   2  991.90   19.70
   0  -4   2  965.12   18.43
   0   4  -2  977.25   18.83
   0   4  -2  970.53   18.46
  -1  -4   2  224.06    4.67
  -1  -4   2  230.18    4.42
   1   4  -2  230.84    4.46
   1   4  -2  234.81    4.62
  -2  -4   2   50.55    1.20
  -2  -4   2   62.80    1.31
  -2  -4   2   60.25    1.44
   2   4  -2   61.90    1.35
  -3  -4   2   51.81    1.09
  -3  -4   2   51.72    1.35
  -3  -4   2   49.88    1.22
   3   4  -2   50.84    1.26
  -4  -4   2   26.11    0.92
  -4  -4   2   27.92    0.82
   4   4  -2   26.24    0.84
  -5  -4   2    0.79    0.24
  -5  -4   2    0.36    0.18
   5   4  -2    0.31    0.18
  -6  -4   2    3.87    0.39
  -6  -4   2    2.80    0.39
  -6  -4   2    2.83    0.20
   6   4  -2    3.16    0.39
  -7  -4   2   35.37    1.18
  -7  -4   2   34.79    1.28
   7   4  -2   35.55    1.21
  -8  -4   2   -0.33    0.20
  -8  -4   2   -0.12    0.19
   8   4  -2   -0.14    0.24
  -9  -4   2   65.67    2.13
  -9  -4   2   67.18    1.97
   9   4  -2   66.43    1.98
 -10  -4   2    5.03    0.67
 -10  -4   2    3.53    0.52
  10   4  -2    4.28    0.62
 -11  -4   2    4.10    0.66
 -11  -4   2    3.90    0.58
  11   4  -2    3.54    0.57
 -12  -4   2    1.77    0.47
 -12  -4   2    1.28    0.49
  12   4  -2    2.19    0.50
 -13  -4   2    0.92    0.41
  13   4  -2    0.74    0.42
 -14  -4   2   -0.44    0.38
  14   4  -2    0.31    0.46
  14  -3   2    0.47    0.41
 -14   3  -2    0.72    0.39
 -14   3  -2    0.62    0.42
  13  -3   2    4.50    0.63
 -13   3  -2    3.53    0.56
 -13   3  -2    2.95    0.57
  12  -3   2    1.63    0.48
 -12   3  -2    1.68    0.41
 -12   3  -2    2.46    0.49
  11  -3   2    0.16    0.29
 -11   3  -2    0.32    0.32
 -11   3  -2    0.24    0.31
 -11   3  -2    0.56    0.38
  10  -3   2    5.92    0.62
 -10   3  -2    6.40    0.62
 -10   3  -2    5.85    0.61
 -10   3  -2    7.06    0.76
   9  -3   2   32.19    1.19
  -9   3  -2   31.63    1.16
  -9   3  -2   30.20    1.16
  -9   3  -2   32.32    1.34
   8  -3   2   17.24    0.85
   8  -3   2   18.42    0.81
  -8   3  -2   17.90    0.78
  -8   3  -2   17.65    0.91
  -8   3  -2   17.52    0.80
   7  -3   2    8.99    0.53
   7  -3   2    8.59    0.57
  -7   3  -2    8.17    0.52
  -7   3  -2    8.39    0.51
  -7   3  -2    9.15    0.60
   6  -3   2   23.27    0.84
   6  -3   2   26.11    0.94
  -6   3  -2   25.92    0.88
  -6   3  -2   25.55    0.98
  -6   3  -2   26.34    0.85
   5  -3   2   29.78    0.97
   5  -3   2   31.52    0.92
  -5   3  -2   30.34    1.03
  -5   3  -2   30.30    0.91
  -5   3  -2   30.05    0.90
   4  -3   2    7.00    0.39
   4  -3   2    7.48    0.37
  -4   3  -2    6.48    0.35
  -4   3  -2    7.50    0.37
  -4   3  -2    7.59    0.45
   3  -3   2  169.90    3.54
   3  -3   2  166.48    3.35
  -3   3  -2  165.85    3.35
  -3   3  -2  174.07    3.39
  -3   3  -2  165.54    3.55
   2  -3   2    6.43    0.28
   2  -3   2    6.51    0.30
   2  -3   2    6.53    0.31
  -2   3  -2    6.68    0.29
  -2   3  -2    6.02    0.28
  -2   3  -2    5.76    0.29
   1  -3   2  881.69   17.54
   1  -3   2  883.21   18.02
   1  -3   2  931.64   17.25
   1  -3   2  935.76   17.25
  -1   3  -2  898.30   17.39
  -1   3  -2  934.34   18.06
   0  -3   2   24.48    0.67
   0  -3   2   25.99    0.61
   0  -3   2   25.16    0.64
   0   3  -2   26.07    0.65
   0   3  -2   25.92    0.66
   0   3  -2   23.79    0.66
  -1  -3   2   13.35    0.46
  -1  -3   2   13.49    0.39
   1   3  -2   13.74    0.34
   1   3  -2   12.94    0.45
   1   3  -2   13.66    0.42
  -2  -3   2  366.06    7.01
  -2  -3   2  371.80    7.34
   2   3  -2  372.19    7.04
  -3  -3   2    9.46    0.44
  -3  -3   2    9.73    0.39
   3   3  -2    9.64    0.42
  -4  -3   2   12.71    0.57
  -4  -3   2   12.67    0.51
   4   3  -2   12.77    0.53
  -5  -3   2    3.18    0.38
  -5  -3   2    3.49    0.20
  -5  -3   2    3.34    0.33
   5   3  -2    3.76    0.37
  -6  -3   2   11.96    0.59
  -6  -3   2   12.56    0.66
   6   3  -2   12.05    0.60
  -7  -3   2    3.29    0.44
  -7  -3   2    2.95    0.38
   7   3  -2    3.37    0.41
  -8  -3   2    1.28    0.31
  -8  -3   2    1.31    0.38
   8   3  -2    1.66    0.34
  -9  -3   2    1.30    0.39
  -9  -3   2    2.05    0.44
   9   3  -2    1.38    0.34
 -10  -3   2   70.87    2.10
 -10  -3   2   69.63    2.26
  10   3  -2   71.39    2.14
 -11  -3   2   10.43    0.98
 -11  -3   2   10.62    0.79
  11   3  -2    9.83    0.87
 -12  -3   2    4.43    0.69
 -12  -3   2    5.67    0.67
  12   3  -2    6.82    0.77
 -13  -3   2    1.68    0.47
  13   3  -2    1.41    0.46
 -14  -3   2    0.48    0.38
  14   3  -2    0.14    0.45
  14  -2   2    0.11    0.35
 -14   2  -2    0.08    0.34
 -14   2  -2   -0.11    0.37
  13  -2   2    1.87    0.52
 -13   2  -2    0.68    0.41
 -13   2  -2    1.56    0.47
  12  -2   2    7.66    0.79
 -12   2  -2    7.48    0.73
 -12   2  -2    6.07    0.71
 -12   2  -2    6.32    0.86
  11  -2   2   26.97    1.20
 -11   2  -2   25.73    1.12
 -11   2  -2   25.69    1.30
 -11   2  -2   25.34    1.15
  10  -2   2   10.59    0.71
 -10   2  -2   10.02    0.79
 -10   2  -2   10.39    0.70
 -10   2  -2    9.58    0.70
   9  -2   2    6.83    0.64
  -9   2  -2    7.62    0.73
  -9   2  -2    7.57    0.58
  -9   2  -2    5.87    0.55
   8  -2   2    0.76    0.26
  -8   2  -2    0.64    0.28
  -8   2  -2    0.50    0.32
  -8   2  -2    0.64    0.27
   7  -2   2    4.00    0.41
   7  -2   2    4.85    0.47
  -7   2  -2    4.16    0.47
  -7   2  -2    4.41    0.42
  -7   2  -2    3.93    0.41
   6  -2   2    8.38    0.49
   6  -2   2    8.40    0.47
  -6   2  -2    8.16    0.44
  -6   2  -2    8.00    0.45
  -6   2  -2    7.53    0.52
   5  -2   2    6.93    0.42
   5  -2   2    6.06    0.40
  -5   2  -2    5.73    0.37
  -5   2  -2    6.04    0.44
  -5   2  -2    6.35    0.39
   4  -2   2  105.07    2.29
   4  -2   2  109.08    2.41
  -4   2  -2  104.75    2.45
  -4   2  -2  109.90    2.31
  -4   2  -2  105.74    2.27
   3  -2   2  251.46    4.89
   3  -2   2  248.72    5.10
  -3   2  -2  256.66    5.14
  -3   2  -2  251.93    4.92
  -3   2  -2  251.42    4.87
   2  -2   2   14.61    0.43
   2  -2   2   15.01    0.45
   2  -2   2   14.40    0.46
   2  -2   2   15.65    0.48
  -2   2  -2   14.73    0.48
  -2   2  -2   15.07    0.43
  -2   2  -2   14.68    0.44
   1  -2   2   73.32    1.46
   1  -2   2   73.83    1.54
  -1   2  -2   72.92    1.49
  -1   2  -2   71.93    1.55
  -1   2  -2   72.33    1.48
   0  -2   2    0.17    0.07
   0   2  -2    0.16    0.08
   0   2  -2    0.28    0.09
  -1  -2   2   90.18    1.84
   1   2  -2   94.41    1.87
   1   2  -2   95.89    1.96
  -2  -2   2   33.29    0.88
  -2  -2   2   33.38    0.80
   2   2  -2   34.91    0.89
   2   2  -2   34.23    0.83
  -3  -2   2   98.66    2.23
  -3  -2   2  101.85    2.10
   3   2  -2   98.89    2.11
  -4  -2   2    0.15    0.14
  -4  -2   2    0.28    0.09
  -4  -2   2    0.29    0.16
   4   2  -2    0.50    0.16
  -5  -2   2  134.72    3.08
  -5  -2   2  132.22    2.88
   5   2  -2  137.15    2.94
  -6  -2   2    7.26    0.45
  -6  -2   2    7.46    0.51
   6   2  -2    7.90    0.48
  -7  -2   2   33.42    1.10
  -7  -2   2   33.62    1.21
   7   2  -2   33.54    1.14
  -8  -2   2    5.51    0.54
  -8  -2   2    5.53    0.59
   8   2  -2    5.68    0.57
  -9  -2   2    1.34    0.33
  -9  -2   2    1.80    0.41
   9   2  -2    0.85    0.33
 -10  -2   2   10.82    0.84
 -10  -2   2    9.54    0.71
  10   2  -2    8.44    0.76
 -11  -2   2    3.85    0.66
 -11  -2   2    3.84    0.57
  11   2  -2    4.69    0.63
 -12  -2   2    4.19    0.63
 -12  -2   2    4.85    0.76
  12   2  -2    4.04    0.62
 -13  -2   2    0.98    0.41
  13   2  -2    1.25    0.50
 -14  -2   2    0.10    0.36
  14   2  -2    0.55    0.42
  14  -1   2    0.07    0.37
 -14   1  -2    0.12    0.40
 -14   1  -2    0.22    0.37
  13  -1   2   -0.16    0.29
 -13   1  -2    0.28    0.33
 -13   1  -2    0.46    0.40
  12  -1   2    0.29    0.38
 -12   1  -2    1.60    0.46
 -12   1  -2    2.04    0.58
 -12   1  -2    1.87    0.47
  11  -1   2    1.94    0.43
 -11   1  -2    2.03    0.45
 -11   1  -2    2.06    0.43
 -11   1  -2    1.60    0.49
  10  -1   2    2.56    0.45
 -10   1  -2    2.62    0.44
 -10   1  -2    3.04    0.57
   9  -1   2   35.86    1.28
  -9   1  -2   35.24    1.41
  -9   1  -2   33.46    1.21
   8  -1   2    9.36    0.59
  -8   1  -2    9.21    0.57
  -8   1  -2    9.24    0.66
   7  -1   2    1.84    0.30
  -7   1  -2    2.30    0.37
  -7   1  -2    1.90    0.29
   6  -1   2   18.14    0.71
  -6   1  -2   19.15    0.71
  -6   1  -2   18.02    0.80
   5  -1   2    0.88    0.21
   5  -1   2    0.29    0.17
  -5   1  -2    0.59    0.22
  -5   1  -2    0.70    0.21
   4  -1   2    3.94    0.28
   4  -1   2    3.67    0.28
  -4   1  -2    3.99    0.28
  -4   1  -2    3.55    0.34
   3  -1   2   71.56    1.61
   3  -1   2   69.00    1.53
  -3   1  -2   69.54    1.52
  -3   1  -2   70.06    1.65
   2  -1   2   27.70    0.68
   2  -1   2   27.60    0.71
   2  -1   2   28.32    0.74
  -2   1  -2   27.65    0.67
  -2   1  -2   27.87    0.74
  -2   1  -2   29.44    0.73
   1  -1   2   65.84    1.30
  -1   1  -2   57.30    1.24
  -1   1  -2   61.19    1.29
   0  -1   2   -0.05    0.01
   0  -1   2   -0.03    0.02
   0  -1   2   -0.04    0.02
   0   1  -2   -0.05    0.01
   0   1  -2   -0.04    0.01
   0   1  -2   -0.06    0.01
  -2  -1   2   10.43    0.31
  -2  -1   2   10.28    0.34
  -2  -1   2   10.46    0.40
   2   1  -2   10.19    0.35
   2   1  -2   10.23    0.39
  -3  -1   2    0.53    0.16
  -3  -1   2    0.40    0.11
  -3  -1   2    0.46    0.09
   3   1  -2    0.62    0.15
   3   1  -2    0.58    0.15
  -4  -1   2   28.13    0.87
  -4  -1   2   28.93    0.81
   4   1  -2   27.28    0.81
  -5  -1   2   29.49    0.89
  -5  -1   2   29.95    0.99
   5   1  -2   29.86    0.92
  -6  -1   2   47.97    1.43
  -6  -1   2   47.17    1.30
   6   1  -2   47.63    1.34
  -7  -1   2   64.97    1.85
  -7  -1   2   64.67    1.70
   7   1  -2   63.00    1.73
  -8  -1   2   -0.09    0.18
  -8  -1   2    0.14    0.23
   8   1  -2    0.34    0.27
  -9  -1   2   33.96    1.34
  -9  -1   2   32.93    1.20
   9   1  -2   32.54    1.23
 -10  -1   2    0.17    0.26
 -10  -1   2    0.02    0.30
  10   1  -2    0.79    0.32
 -11  -1   2    1.49    0.41
 -11  -1   2    1.42    0.42
  11   1  -2    1.12    0.39
 -12  -1   2    0.51    0.37
 -12  -1   2    1.02    0.48
  12   1  -2    0.81    0.39
 -13  -1   2    1.94    0.48
  13   1  -2    2.64    0.54
 -14  -1   2    0.52    0.37
 -14  -1   2   -0.08    0.37
  14   1  -2    0.99    0.49
  14   0   2    4.15    0.68
 -14   0  -2    2.94    0.61
 -14   0  -2    2.66    0.59
  13   0   2    0.08    0.34
 -13   0  -2   -0.09    0.36
 -13   0  -2    0.72    0.38
  12   0   2   12.83    0.87
 -12   0  -2   11.86    0.96
 -12   0  -2   11.25    0.84
  11   0   2    0.48    0.36
 -11   0  -2   -0.10    0.31
 -11   0  -2    0.60    0.37
  10   0   2   50.24    1.63
 -10   0  -2   46.43    1.78
 -10   0  -2   49.70    1.64
   9   0   2    0.00    0.27
  -9   0  -2   -0.30    0.20
  -9   0  -2    0.39    0.30
   8   0   2   45.21    1.42
  -8   0  -2   46.83    1.43
  -8   0  -2   47.35    1.60
   7   0   2    0.08    0.20
  -7   0  -2    0.33    0.23
  -7   0  -2   -0.19    0.18
   6   0   2    0.15    0.17
  -6   0  -2    0.12    0.18
  -6   0  -2    0.43    0.18
   5   0   2   -0.10    0.14
  -5   0  -2   -0.33    0.15
  -5   0  -2   -0.17    0.15
   4   0   2    0.32    0.16
  -4   0  -2    0.26    0.16
  -4   0  -2    0.08    0.14
   3   0   2   -0.14    0.10
  -3   0  -2    0.08    0.14
  -3   0  -2   -0.16    0.09
   2   0   2   52.50    1.19
   2   0   2   55.16    1.15
   2   0   2   53.31    1.21
  -2   0  -2   48.18    1.21
  -2   0  -2   54.80    1.19
  -2   0  -2   53.60    1.14
   1   0   2   -0.19    0.02
   1   0   2   -0.18    0.02
   1   0   2   -0.15    0.03
   1   0   2   -0.02    0.04
  -1   0  -2   -0.20    0.02
  -1   0  -2   -0.18    0.02
  -1   0  -2   -0.19    0.02
  -1   0  -2   -0.19    0.02
   0   0   2    0.00    0.00
   0   0   2   -0.01    0.01
   0   0   2    0.02    0.02
   0   0   2    0.00    0.01
   0   0  -2    0.00    0.00
   0   0  -2   -0.01    0.01
   0   0  -2   -0.01    0.01
   0   0  -2    0.00    0.00
   0   0  -2    0.00    0.01
  -1   0   2   -0.16    0.03
  -1   0   2   -0.18    0.01
  -1   0   2   -0.17    0.02
  -1   0   2   -0.19    0.01
   1   0  -2   -0.18    0.02
   1   0  -2   -0.19    0.01
   1   0  -2   -0.20    0.01
   1   0  -2   -0.20    0.02
   1   0  -2   -0.19    0.02
  -2   0   2    9.85    0.34
  -2   0   2    9.82    0.33
  -2   0   2    9.21    0.36
   2   0  -2   10.10    0.37
   2   0  -2    9.91    0.31
   2   0  -2    9.97    0.34
  -3   0   2   -0.09    0.10
  -3   0   2    0.02    0.10
   3   0  -2   -0.14    0.09
   3   0  -2   -0.09    0.06
   3   0  -2   -0.14    0.10
  -4   0   2  109.88    2.47
  -4   0   2  106.18    2.30
   4   0  -2  113.07    2.32
   4   0  -2  108.47    2.34
  -5   0   2   -0.34    0.14
  -5   0   2    0.06    0.14
   5   0  -2   -0.07    0.14
   5   0  -2   -0.09    0.08
  -6   0   2    0.24    0.16
  -6   0   2    0.34    0.21
   6   0  -2    0.16    0.17
   6   0  -2    0.23    0.09
  -7   0   2    0.20    0.20
  -7   0   2    0.24    0.21
   7   0  -2    0.02    0.07
   7   0  -2   -0.07    0.17
  -8   0   2    1.23    0.32
  -8   0   2    2.16    0.33
   8   0  -2    0.92    0.28
  -9   0   2    0.00    0.28
  -9   0   2   -0.26    0.24
   9   0  -2    0.36    0.25
 -10   0   2   13.84    0.77
 -10   0   2   12.47    0.85
  10   0  -2   14.10    0.83
 -11   0   2   -0.04    0.31
 -11   0   2    0.27    0.30
  11   0  -2    0.00    0.27
 -12   0   2   18.88    1.01
  12   0  -2   20.79    1.12
 -13   0   2    0.42    0.34
 -13   0   2   -0.04    0.31
  13   0  -2   -0.16    0.37
 -14   0   2   -0.35    0.34
 -14   0   2    0.32    0.36
  14   0  -2   -0.35    0.33
  14   1   2    0.30    0.44
 -14  -1  -2    0.52    0.43
  13   1   2   -0.06    0.33
 -13  -1  -2    0.01    0.37
 -13  -1  -2    0.61    0.47
  12   1   2    1.90    0.45
 -12  -1  -2    1.09    0.43
 -12  -1  -2    0.60    0.41
  11   1   2    3.16    0.50
 -11  -1  -2    2.56    0.54
 -11  -1  -2    2.16    0.47
  10   1   2    3.25    0.49
 -10  -1  -2    2.87    0.53
 -10  -1  -2    3.16    0.48
   9   1   2   31.81    1.22
  -9  -1  -2   34.80    1.41
  -9  -1  -2   35.46    1.24
   8   1   2    9.79    0.61
  -8  -1  -2    9.64    0.60
  -8  -1  -2    9.42    0.68
   7   1   2    1.56    0.29
  -7  -1  -2    2.41    0.39
  -7  -1  -2    2.02    0.31
   6   1   2   19.12    0.73
  -6  -1  -2   17.07    0.70
  -6  -1  -2   18.85    0.84
   5   1   2    1.25    0.23
  -5  -1  -2    0.53    0.21
  -5  -1  -2    0.69    0.19
   4   1   2    4.07    0.29
  -4  -1  -2    3.81    0.35
  -4  -1  -2    4.03    0.28
   3   1   2   69.39    1.50
  -3  -1  -2   68.24    1.50
  -3  -1  -2   65.69    1.60
   2   1   2   26.57    0.66
   2   1   2   28.80    0.73
  -2  -1  -2   24.30    0.70
  -2  -1  -2   27.13    0.66
   1   1   2   75.73    1.40
  -1  -1  -2   65.71    1.38
   0  -1  -2   -0.05    0.01
  -2   1   2   10.46    0.33
  -2   1   2   10.01    0.30
  -2   1   2   10.52    0.31
   2  -1  -2   10.16    0.36
   2  -1  -2   10.92    0.33
   2  -1  -2    7.90    0.30
  -3   1   2    0.36    0.12
  -3   1   2    0.28    0.10
   3  -1  -2    0.28    0.12
   3  -1  -2    0.28    0.10
   3  -1  -2    0.54    0.12
  -4   1   2   27.50    0.85
  -4   1   2   28.34    0.78
   4  -1  -2   28.59    0.84
   4  -1  -2   28.02    0.80
   4  -1  -2   29.04    0.88
  -5   1   2   30.11    0.98
  -5   1   2   30.21    0.87
   5  -1  -2   29.18    0.90
  -6   1   2   45.90    1.25
  -6   1   2   47.21    1.39
   6  -1  -2   46.77    1.31
  -7   1   2   62.86    1.63
  -7   1   2   64.10    1.83
   7  -1  -2   61.04    1.67
  -8   1   2    0.16    0.21
  -8   1   2   -0.22    0.23
   8  -1  -2    0.27    0.22
  -9   1   2   31.51    1.14
  -9   1   2   33.30    1.32
   9  -1  -2   33.46    1.24
 -10   1   2    0.15    0.34
 -10   1   2    0.16    0.26
  10  -1  -2   -0.49    0.30
 -11   1   2    0.49    0.33
 -11   1   2    1.42    0.38
 -11   1   2    1.03    0.42
  11  -1  -2    1.67    0.42
 -12   1   2    0.16    0.29
 -12   1   2    0.63    0.33
  12  -1  -2   -0.15    0.28
 -13   1   2    1.57    0.44
 -13   1   2    2.17    0.50
  13  -1  -2    2.25    0.56
 -14   1   2    0.36    0.38
 -14   1   2    0.80    0.39
  14  -1  -2    0.19    0.36
  14   2   2    0.28    0.39
 -14  -2  -2    0.07    0.42
  13   2   2    1.98    0.54
 -13  -2  -2    2.39    0.62
 -13  -2  -2    0.85    0.41
  12   2   2    5.90    0.70
 -12  -2  -2    6.79    0.89
 -12  -2  -2    6.57    0.73
  11   2   2   24.94    1.19
 -11  -2  -2   27.09    1.39
 -11  -2  -2   24.56    1.14
  10   2   2   10.77    0.73
 -10  -2  -2    9.94    0.93
 -10  -2  -2    9.27    0.72
   9   2   2    7.31    0.66
  -9  -2  -2    5.79    0.68
  -9  -2  -2    6.67    0.60
   8   2   2    1.23    0.31
  -8  -2  -2    0.53    0.30
  -8  -2  -2    0.74    0.28
   7   2   2    4.59    0.47
  -7  -2  -2    4.22    0.43
  -7  -2  -2    4.31    0.51
   6   2   2    7.34    0.46
  -6  -2  -2    7.14    0.45
  -6  -2  -2    7.44    0.52
   5   2   2    6.24    0.40
  -5  -2  -2    6.56    0.40
  -5  -2  -2    6.09    0.45
   4   2   2  105.39    2.30
  -4  -2  -2  108.07    2.29
  -4  -2  -2  104.12    2.44
   3   2   2  253.49    4.96
  -3  -2  -2  258.29    4.96
  -3  -2  -2  253.43    5.21
   2   2   2   14.54    0.43
  -2  -2  -2   14.63    0.49
  -2  -2  -2   14.36    0.43
   1   2   2   73.61    1.53
   1   2   2   73.17    1.57
   1   2   2   71.88    1.46
  -1  -2  -2   74.19    1.45
   0   2   2    0.25    0.06
   0   2   2    0.17    0.08
   0   2   2   -0.07    0.03
   0   2   2    0.14    0.05
   0  -2  -2   -0.16    0.02
   0  -2  -2    0.14    0.04
  -1   2   2   94.21    1.86
  -1   2   2   90.74    1.87
  -1   2   2   93.10    2.02
   1  -2  -2   94.77    1.80
  -2   2   2   33.38    0.74
  -2   2   2   34.30    0.75
   2  -2  -2   35.15    0.77
   2  -2  -2   33.05    0.77
   2  -2  -2   34.64    0.83
   2  -2  -2   34.02    0.81
  -3   2   2   99.42    2.17
  -3   2   2  100.89    2.03
  -3   2   2   99.91    2.03
   3  -2  -2   97.29    2.14
   3  -2  -2   99.38    2.07
   3  -2  -2  101.47    2.19
  -4   2   2    0.26    0.13
  -4   2   2    0.22    0.11
  -4   2   2    0.41    0.13
   4  -2  -2    0.29    0.15
   4  -2  -2    0.36    0.15
   4  -2  -2    0.29    0.12
  -5   2   2  135.77    3.02
  -5   2   2  134.76    2.82
  -5   2   2  132.48    2.80
   5  -2  -2  130.81    2.85
   5  -2  -2  134.14    2.97
  -6   2   2    7.19    0.43
  -6   2   2    8.71    0.53
  -6   2   2    7.94    0.43
   6  -2  -2    7.02    0.46
   6  -2  -2    7.64    0.49
  -7   2   2   34.19    1.20
  -7   2   2   34.87    1.07
  -7   2   2   34.75    1.07
   7  -2  -2   32.87    1.10
  -8   2   2    5.15    0.47
  -8   2   2    5.25    0.55
  -8   2   2    4.93    0.45
   8  -2  -2    5.65    0.53
  -9   2   2    1.23    0.31
  -9   2   2    0.96    0.36
  -9   2   2    1.51    0.34
   9  -2  -2    0.60    0.30
 -10   2   2   10.06    0.68
 -10   2   2   10.67    0.80
 -10   2   2    9.81    0.66
  10  -2  -2    9.59    0.73
 -11   2   2    3.69    0.49
 -11   2   2    3.99    0.61
 -11   2   2    2.32    0.44
  11  -2  -2    3.05    0.53
 -12   2   2    3.35    0.52
 -12   2   2    4.43    0.58
  12  -2  -2    4.15    0.61
 -13   2   2    0.53    0.36
 -13   2   2    1.03    0.37
  13  -2  -2    0.52    0.44
 -14   2   2   -0.29    0.35
 -14   2   2   -0.30    0.35
  14  -2  -2    0.54    0.45
  14   3   2    0.60    0.43
 -14  -3  -2    0.41    0.47
  13   3   2    2.75    0.55
 -13  -3  -2    2.50    0.63
 -13  -3  -2    2.54    0.54
  12   3   2    2.30    0.50
 -12  -3  -2    2.54    0.50
 -12  -3  -2    1.78    0.52
  11   3   2   -0.08    0.32
 -11  -3  -2   -0.15    0.29
 -11  -3  -2   -0.54    0.30
  10   3   2    6.50    0.66
 -10  -3  -2    6.26    0.64
 -10  -3  -2    7.18    0.79
   9   3   2   29.70    1.18
  -9  -3  -2   32.88    1.39
  -9  -3  -2   32.71    1.24
   8   3   2   16.93    0.82
  -8  -3  -2   19.00    0.96
  -8  -3  -2   17.10    0.84
   7   3   2    8.71    0.57
  -7  -3  -2    8.85    0.62
  -7  -3  -2    8.01    0.53
   6   3   2   25.73    0.90
  -6  -3  -2   25.00    0.99
  -6  -3  -2   25.01    0.88
   5   3   2   30.97    0.95
  -5  -3  -2   30.41    1.05
  -5  -3  -2   31.22    0.95
   4   3   2    6.96    0.38
  -4  -3  -2    7.03    0.44
  -4  -3  -2    7.07    0.37
   3   3   2  169.29    3.42
  -3  -3  -2  172.47    3.42
  -3  -3  -2  170.16    3.62
   2   3   2    6.01    0.28
  -2  -3  -2    5.76    0.26
  -2  -3  -2    6.37    0.32
   1   3   2  934.16   18.85
   1   3   2  959.09   17.62
  -1  -3  -2  885.06   18.24
  -1  -3  -2  924.08   17.52
   0   3   2   26.13    0.70
   0   3   2   24.40    0.59
   0   3   2   26.49    0.58
   0   3   2   26.33    0.61
   0  -3  -2   26.77    0.61
   0  -3  -2   25.16    0.58
   0  -3  -2   27.01    0.57
  -1   3   2   13.29    0.37
  -1   3   2   13.26    0.47
  -1   3   2   11.27    0.35
   1  -3  -2   12.47    0.34
   1  -3  -2   12.72    0.37
   1  -3  -2   13.87    0.37
   1  -3  -2   14.00    0.34
  -2   3   2  355.42    6.78
  -2   3   2  361.63    6.76
   2  -3  -2  356.60    7.05
   2  -3  -2  366.53    6.78
   2  -3  -2  360.69    7.07
  -3   3   2    8.97    0.39
  -3   3   2    9.28    0.33
  -3   3   2    9.43    0.34
   3  -3  -2    9.71    0.41
   3  -3  -2    9.31    0.37
   3  -3  -2    9.30    0.36
  -4   3   2   12.80    0.46
  -4   3   2   12.31    0.52
  -4   3   2   13.05    0.45
   4  -3  -2   12.74    0.54
   4  -3  -2   12.36    0.48
   4  -3  -2   13.10    0.51
  -5   3   2    3.53    0.27
  -5   3   2    2.84    0.26
  -5   3   2    3.23    0.35
   5  -3  -2    2.81    0.30
   5  -3  -2    3.25    0.30
  -6   3   2   11.89    0.61
  -6   3   2   11.95    0.53
  -6   3   2   12.19    0.53
   6  -3  -2   11.36    0.55
   6  -3  -2   12.58    0.61
  -7   3   2    3.09    0.33
  -7   3   2    3.89    0.46
  -7   3   2    2.93    0.33
   7  -3  -2    3.12    0.38
   7  -3  -2    3.62    0.40
  -8   3   2    1.65    0.31
  -8   3   2    2.20    0.31
  -8   3   2    1.72    0.37
   8  -3  -2    2.15    0.37
   8  -3  -2    1.59    0.32
  -9   3   2    1.22    0.32
  -9   3   2    1.35    0.32
  -9   3   2    1.60    0.38
   9  -3  -2    1.37    0.35
 -10   3   2   70.16    1.99
 -10   3   2   74.07    2.27
 -10   3   2   73.19    2.00
  10  -3  -2   71.50    2.09
 -11   3   2   11.49    0.72
 -11   3   2   12.31    0.75
  11  -3  -2    9.95    0.74
 -12   3   2    6.01    0.64
 -12   3   2    5.37    0.60
  12  -3  -2    5.70    0.71
 -13   3   2    1.00    0.39
 -13   3   2    0.52    0.32
  13  -3  -2    1.09    0.42
 -14   3   2    1.08    0.43
 -14   3   2    0.47    0.41
  14  -3  -2   -0.19    0.35
  14   4   2    0.76    0.49
 -14  -4  -2    0.66    0.44
  13   4   2    0.26    0.36
 -13  -4  -2    0.29    0.41
 -13  -4  -2   -0.06    0.34
  12   4   2    5.46    0.68
 -12  -4  -2    5.91    0.85
 -12  -4  -2    4.57    0.65
  11   4   2   13.08    0.86
 -11  -4  -2   15.30    0.95
 -11  -4  -2   12.77    0.97
  10   4   2   39.48    1.45
 -10  -4  -2   40.30    1.64
 -10  -4  -2   38.10    1.45
   9   4   2    4.25    0.56
  -9  -4  -2    3.92    0.53
  -9  -4  -2    4.12    0.60
   8   4   2    6.27    0.57
  -8  -4  -2    5.90    0.56
  -8  -4  -2    7.84    0.73
   7   4   2   11.67    0.63
  -7  -4  -2   10.21    0.60
  -7  -4  -2   11.42    0.71
   6   4   2   60.08    1.59
  -6  -4  -2   58.42    1.72
  -6  -4  -2   56.90    1.56
   5   4   2    5.59    0.38
  -5  -4  -2    4.89    0.46
  -5  -4  -2    5.32    0.40
   4   4   2    8.07    0.42
  -4  -4  -2    8.23    0.48
  -4  -4  -2    8.63    0.43
   3   4   2   19.97    0.64
  -3  -4  -2   20.04    0.71
  -3  -4  -2   20.37    0.62
   2   4   2   36.44    0.90
   2   4   2   35.73    0.89
  -2  -4  -2   35.43    0.96
  -2  -4  -2   35.32    0.86
   1   4   2  215.17    4.34
   1   4   2  209.11    4.05
  -1  -4  -2  210.65    4.03
  -1  -4  -2  207.18    4.25
   0   4   2 1000.00   19.64
   0   4   2  999.15   18.74
   0  -4  -2  993.43   19.62
   0  -4  -2  977.38   18.71
  -1   4   2  231.42    4.78
   1  -4  -2  230.91    4.33
   1  -4  -2  224.65    4.52
   1  -4  -2  226.39    4.55
  -2   4   2   62.19    1.58
  -2   4   2   63.37    1.33
   2  -4  -2   64.57    1.41
   2  -4  -2   64.46    1.43
   2  -4  -2   61.20    1.34
  -3   4   2   49.69    1.13
  -3   4   2   48.49    1.12
   3  -4  -2   49.43    1.22
   3  -4  -2   51.61    1.23
   3  -4  -2   48.90    1.15
  -4   4   2   25.91    0.84
  -4   4   2   25.69    0.73
  -4   4   2   27.06    0.74
   4  -4  -2   26.42    0.82
   4  -4  -2   27.44    0.84
   4  -4  -2   25.89    0.76
  -5   4   2    0.43    0.15
  -5   4   2    0.36    0.14
  -5   4   2    0.39    0.18
   5  -4  -2    0.40    0.18
   5  -4  -2    0.33    0.15
  -6   4   2    2.79    0.30
  -6   4   2    2.84    0.30
  -6   4   2    2.43    0.35
   6  -4  -2    3.00    0.35
   6  -4  -2    3.30    0.34
  -7   4   2   37.66    1.25
  -7   4   2   35.68    1.08
  -7   4   2   35.84    1.09
   7  -4  -2   34.95    1.13
   7  -4  -2   35.62    1.21
  -8   4   2   -0.17    0.19
  -8   4   2   -0.19    0.16
  -8   4   2    0.19    0.20
   8  -4  -2   -0.08    0.18
   8  -4  -2    0.04    0.21
  -9   4   2   63.70    1.77
  -9   4   2   67.96    2.03
  -9   4   2   65.73    1.78
   9  -4  -2   64.62    1.97
   9  -4  -2   65.27    1.89
 -10   4   2    3.94    0.48
 -10   4   2    3.84    0.48
 -10   4   2    3.49    0.57
  10  -4  -2    5.07    0.60
 -11   4   2    3.30    0.47
 -11   4   2    2.81    0.44
  11  -4  -2    2.67    0.48
 -12   4   2    1.00    0.38
 -12   4   2    2.01    0.43
  12  -4  -2    1.21    0.40
 -13   4   2    0.01    0.31
 -13   4   2    0.34    0.36
  13  -4  -2    1.18    0.43
 -14   4   2   -0.05    0.33
 -14   4   2   -0.05    0.51
  14  -4  -2    0.04    0.44
  14   5   2    0.29    0.44
 -14  -5  -2   -0.11    0.37
  13   5   2    0.27    0.41
 -13  -5  -2    0.61    0.51
 -13  -5  -2   -0.04    0.36
  12   5   2    0.35    0.34
 -12  -5  -2    1.26    0.52
 -12  -5  -2    0.82    0.40
  11   5   2    0.06    0.26
 -11  -5  -2   -0.35    0.39
 -11  -5  -2   -0.35    0.25
  10   5   2    2.82    0.50
 -10  -5  -2    2.22    0.52
 -10  -5  -2    3.41    0.53
   9   5   2    7.57    0.69
  -9  -5  -2    8.73    0.82
  -9  -5  -2    8.34    0.64
   8   5   2   10.30    0.65
  -8  -5  -2    9.92    0.64
  -8  -5  -2    9.19    0.82
   7   5   2   66.75    1.85
  -7  -5  -2   68.12    1.45
  -7  -5  -2   69.78    2.05
  -7  -5  -2   69.12    1.88
   6   5   2   -0.48    0.16
  -6  -5  -2    0.02    0.20
  -6  -5  -2    0.23    0.22
   5   5   2   30.40    0.97
  -5  -5  -2   31.17    1.09
  -5  -5  -2   31.08    0.97
   4   5   2   44.83    1.19
  -4  -5  -2   43.94    1.30
  -4  -5  -2   44.36    1.18
   3   5   2   14.94    0.55
  -3  -5  -2   14.88    0.53
  -3  -5  -2   14.07    0.60
   2   5   2   89.94    1.96
   2   5   2   87.89    1.89
  -2  -5  -2   87.29    1.85
  -2  -5  -2   87.05    2.02
   1   5   2   16.86    0.56
   1   5   2   17.61    0.51
  -1  -5  -2   17.36    0.57
  -1  -5  -2   17.43    0.49
   0   5   2    7.04    0.27
   0   5   2    6.69    0.35
   0  -5  -2    6.85    0.26
   0  -5  -2    6.93    0.32
  -1   5   2   13.93    0.56
   1  -5  -2   14.08    0.48
   1  -5  -2   14.32    0.46
   1  -5  -2   14.83    0.42
  -2   5   2   63.37    1.65
  -2   5   2   63.86    1.36
   2  -5  -2   63.83    1.46
   2  -5  -2   63.08    1.47
   2  -5  -2   63.66    1.37
  -3   5   2   15.45    0.49
   3  -5  -2   15.26    0.56
   3  -5  -2   15.73    0.51
   3  -5  -2   16.38    0.55
  -4   5   2    0.25    0.15
  -4   5   2    0.06    0.12
  -4   5   2   -0.06    0.11
   4  -5  -2    0.17    0.17
   4  -5  -2   -0.01    0.12
   4  -5  -2    0.13    0.13
  -5   5   2    0.21    0.12
  -5   5   2    0.42    0.15
  -5   5   2    0.26    0.18
   5  -5  -2    0.01    0.13
   5  -5  -2    0.61    0.19
  -6   5   2   17.08    0.75
  -6   5   2   17.54    0.65
  -6   5   2   17.86    0.65
   6  -5  -2   17.47    0.75
   6  -5  -2   17.83    0.71
  -7   5   2   14.34    0.73
  -7   5   2   13.52    0.61
  -7   5   2   14.56    0.63
   7  -5  -2   14.22    0.67
   7  -5  -2   13.42    0.69
  -8   5   2   47.75    1.39
  -8   5   2   51.78    1.63
  -8   5   2   50.89    1.42
   8  -5  -2   48.59    1.48
   8  -5  -2   48.83    1.58
  -9   5   2    4.65    0.48
  -9   5   2    5.03    0.49
  -9   5   2    6.09    0.65
   9  -5  -2    5.01    0.54
   9  -5  -2    5.20    0.60
 -10   5   2   34.73    1.21
 -10   5   2   32.53    1.19
  10  -5  -2   33.47    1.31
  10  -5  -2   34.81    1.41
 -11   5   2   17.40    0.89
 -11   5   2   18.23    0.89
  11  -5  -2   15.47    0.94
 -12   5   2    0.26    0.31
 -12   5   2    0.07    0.28
  12  -5  -2    0.06    0.30
 -13   5   2    1.25    0.40
  13  -5  -2    1.77    0.52
 -14   5   2    9.37    0.84
 -14   5   2   10.09    1.17
  14  -5  -2   10.26    1.00
  13   6   2   -0.42    0.31
 -13  -6  -2    0.37    0.47
 -13  -6  -2   -0.16    0.39
  12   6   2    2.96    0.58
 -12  -6  -2    1.43    0.50
 -12  -6  -2    2.88    0.64
  11   6   2    0.05    0.30
 -11  -6  -2    0.00    0.38
 -11  -6  -2   -0.23    0.33
  10   6   2    6.78    0.72
 -10  -6  -2    6.15    0.67
 -10  -6  -2    6.57    0.78
   9   6   2    3.83    0.54
  -9  -6  -2    3.41    0.59
  -9  -6  -2    4.65    0.58
   8   6   2    2.57    0.41
  -8  -6  -2    2.79    0.47
  -8  -6  -2    2.85    0.51
   7   6   2   17.47    0.82
  -7  -6  -2   17.78    0.93
  -7  -6  -2   19.98    0.87
   6   6   2    5.78    0.44
  -6  -6  -2    5.91    0.45
  -6  -6  -2    5.60    0.55
   5   6   2    2.04    0.29
  -5  -6  -2    2.55    0.33
  -5  -6  -2    2.81    0.38
   4   6   2   12.04    0.54
  -4  -6  -2   10.98    0.59
  -4  -6  -2   11.28    0.51
   3   6   2  356.17    6.77
  -3  -6  -2  344.93    7.10
  -3  -6  -2  340.41    6.72
   2   6   2    1.44    0.20
   2   6   2    1.79    0.20
  -2  -6  -2    1.66    0.19
  -2  -6  -2    1.34    0.22
   1   6   2   26.22    0.78
   1   6   2   25.49    0.70
  -1  -6  -2   25.95    0.79
  -1  -6  -2   25.44    0.68
   0   6   2  139.92    3.12
   0   6   2  142.03    2.82
   0  -6  -2  143.70    2.82
   0  -6  -2  140.52    3.02
  -1   6   2    6.26    0.39
   1  -6  -2    6.62    0.34
   1  -6  -2    6.30    0.27
   1  -6  -2    5.49    0.30
  -2   6   2    7.86    0.48
   2  -6  -2    8.39    0.38
   2  -6  -2    7.58    0.39
   2  -6  -2    7.89    0.33
  -3   6   2   15.90    0.52
  -3   6   2   16.56    0.73
   3  -6  -2   16.14    0.54
   3  -6  -2   15.28    0.59
   3  -6  -2   16.45    0.59
  -4   6   2    0.99    0.17
  -4   6   2    0.84    0.20
   4  -6  -2    0.92    0.21
   4  -6  -2    0.90    0.21
   4  -6  -2    0.53    0.16
  -5   6   2   35.86    1.13
  -5   6   2   37.19    1.00
  -5   6   2   37.13    1.02
   5  -6  -2   37.26    1.05
   5  -6  -2   34.42    1.11
  -6   6   2    3.39    0.41
  -6   6   2    3.96    0.35
  -6   6   2    3.65    0.34
   6  -6  -2    4.06    0.39
   6  -6  -2    2.78    0.35
  -7   6   2    4.03    0.45
  -7   6   2    3.67    0.37
  -7   6   2    3.47    0.35
   7  -6  -2    3.57    0.40
   7  -6  -2    3.28    0.42
  -8   6   2   12.12    0.63
  -8   6   2   12.68    0.75
  -8   6   2   13.57    0.63
   8  -6  -2   13.21    0.77
   8  -6  -2   14.11    0.74
  -9   6   2   16.70    0.93
  -9   6   2   17.83    0.79
  -9   6   2   17.51    0.80
   9  -6  -2   16.59    0.90
   9  -6  -2   14.97    0.82
 -10   6   2    5.12    0.53
 -10   6   2    4.78    0.51
  10  -6  -2    4.60    0.61
  10  -6  -2    4.21    0.55
 -11   6   2    5.45    0.56
 -11   6   2    5.84    0.59
  11  -6  -2    5.23    0.65
  11  -6  -2    5.27    0.61
 -12   6   2    0.75    0.34
 -12   6   2    1.03    0.38
  12  -6  -2    1.18    0.43
 -13   6   2    0.66    0.35
 -13   6   2    0.47    0.48
  13  -6  -2    0.95    0.41
  14  -6  -2   -0.04    0.41
  13   7   2    0.68    0.42
 -13  -7  -2   -0.42    0.51
 -13  -7  -2    0.34    0.41
  12   7   2    7.77    0.85
 -12  -7  -2    8.75    0.90
 -12  -7  -2    8.21    0.99
  11   7   2    8.19    0.84
 -11  -7  -2    6.76    0.86
 -11  -7  -2    7.52    0.78
  10   7   2    0.79    0.38
 -10  -7  -2    1.20    0.49
 -10  -7  -2    0.24    0.31
   9   7   2    0.32    0.31
  -9  -7  -2    0.52    0.39
  -9  -7  -2   -0.03    0.30
   8   7   2    8.31    0.61
  -8  -7  -2    6.87    0.64
  -8  -7  -2    7.31    0.73
   7   7   2    0.44    0.23
  -7  -7  -2    0.32    0.26
  -7  -7  -2    0.28    0.27
   6   7   2   -0.08    0.20
  -6  -7  -2    0.25    0.24
  -6  -7  -2    0.25    0.20
   5   7   2    3.08    0.36
  -5  -7  -2    3.53    0.37
  -5  -7  -2    2.97    0.40
   4   7   2   10.52    0.51
  -4  -7  -2    9.72    0.49
  -4  -7  -2    9.44    0.56
   3   7   2    4.92    0.35
  -3  -7  -2    5.35    0.33
  -3  -7  -2    4.53    0.42
   2   7   2    1.75    0.22
   2   7   2    1.68    0.22
  -2  -7  -2    1.76    0.26
  -2  -7  -2    1.49    0.19
   1   7   2   20.33    0.70
   1   7   2   20.98    0.64
  -1  -7  -2   21.15    0.74
  -1  -7  -2   20.81    0.62
   0   7   2   18.83    0.57
   0   7   2   18.09    0.69
   0  -7  -2   18.11    0.56
   0  -7  -2   18.23    0.66
  -1   7   2    4.68    0.27
  -1   7   2    4.54    0.42
   1  -7  -2    4.61    0.33
   1  -7  -2    5.07    0.32
   1  -7  -2    4.68    0.27
  -2   7   2   25.84    0.95
   2  -7  -2   25.64    0.83
   2  -7  -2   26.69    0.80
   2  -7  -2   26.43    0.73
  -3   7   2    0.02    0.11
  -3   7   2    0.01    0.18
  -3   7   2    0.01    0.06
   3  -7  -2    0.06    0.10
   3  -7  -2    0.08    0.14
   3  -7  -2   -0.11    0.13
  -4   7   2   14.84    0.54
  -4   7   2   14.39    0.75
  -4   7   2   14.32    0.61
   4  -7  -2   13.87    0.61
   4  -7  -2   15.46    0.57
   4  -7  -2   15.39    0.61
  -5   7   2   11.19    0.57
  -5   7   2   11.24    0.48
   5  -7  -2   11.70    0.60
   5  -7  -2   11.17    0.52
  -6   7   2    6.21    0.40
  -6   7   2    7.31    0.44
  -6   7   2    6.91    0.50
   6  -7  -2    6.85    0.50
   6  -7  -2    6.27    0.43
  -7   7   2   12.15    0.59
  -7   7   2   11.89    0.68
  -7   7   2   11.52    0.57
   7  -7  -2   12.30    0.70
   7  -7  -2   11.68    0.61
  -8   7   2   48.90    1.59
  -8   7   2   47.35    1.38
  -8   7   2   48.23    1.41
   8  -7  -2   46.71    1.46
   8  -7  -2   49.31    1.60
  -9   7   2    0.06    0.22
  -9   7   2    0.32    0.24
   9  -7  -2   -0.05    0.28
   9  -7  -2    0.85    0.32
 -10   7   2    0.69    0.28
 -10   7   2    0.87    0.29
  10  -7  -2    0.68    0.34
  10  -7  -2    0.85    0.35
 -11   7   2   -0.01    0.25
 -11   7   2   -0.08    0.25
  11  -7  -2   -0.14    0.32
  11  -7  -2    0.19    0.33
 -12   7   2    6.21    0.94
 -12   7   2    5.26    0.58
  12  -7  -2    5.59    0.70
 -13   7   2   -0.11    0.28
 -13   7   2   -0.75    0.50
  13  -7  -2    0.25    0.41
  13   8   2    5.77    0.80
 -13  -8  -2    4.35    0.90
 -13  -8  -2    7.35    0.93
  12   8   2    3.65    0.63
 -12  -8  -2    3.64    0.72
 -12  -8  -2    2.96    0.60
  11   8   2    4.66    0.68
 -11  -8  -2    4.08    0.68
 -11  -8  -2    4.33    0.75
  10   8   2    0.83    0.38
 -10  -8  -2    0.29    0.38
 -10  -8  -2    0.60    0.36
   9   8   2    0.29    0.27
  -9  -8  -2    0.62    0.32
  -9  -8  -2    0.35    0.36
   8   8   2    1.66    0.41
  -8  -8  -2    2.41    0.49
  -8  -8  -2    1.61    0.41
   7   8   2   18.10    0.86
  -7  -8  -2   17.15    0.86
  -7  -8  -2   18.45    0.98
   6   8   2   35.35    1.20
  -6  -8  -2   38.08    1.37
  -6  -8  -2   34.88    1.20
   5   8   2    0.01    0.17
  -5  -8  -2   -0.03    0.20
  -5  -8  -2   -0.09    0.18
   4   8   2   22.67    0.82
  -4  -8  -2   23.12    0.82
  -4  -8  -2   24.76    0.95
   3   8   2    3.53    0.34
   3   8   2    3.06    0.29
  -3  -8  -2    3.22    0.38
  -3  -8  -2    3.37    0.33
   2   8   2   79.34    1.83
   2   8   2   79.49    1.92
  -2  -8  -2   79.61    2.01
  -2  -8  -2   79.47    1.80
   1   8   2   35.48    1.05
   1   8   2   35.46    0.95
  -1  -8  -2   36.56    0.94
  -1  -8  -2   31.65    1.04
   0   8   2    2.53    0.25
   0   8   2    2.13    0.29
   0  -8  -2    2.21    0.23
   0  -8  -2    2.20    0.28
  -1   8   2  123.93    2.58
  -1   8   2  123.53    2.95
   1  -8  -2  122.93    2.79
   1  -8  -2  125.94    2.58
   1  -8  -2  123.53    2.74
  -2   8   2   20.18    0.86
   2  -8  -2   20.06    0.74
   2  -8  -2   20.38    0.71
   2  -8  -2   19.89    0.63
  -3   8   2   10.65    0.64
   3  -8  -2   11.19    0.54
   3  -8  -2   11.00    0.46
   3  -8  -2   11.66    0.53
  -4   8   2   47.43    1.19
  -4   8   2   44.79    1.55
   4  -8  -2   48.34    1.35
   4  -8  -2   47.65    1.24
   4  -8  -2   48.45    1.37
  -5   8   2    1.95    0.26
  -5   8   2    2.47    0.33
  -5   8   2    1.84    0.38
   5  -8  -2    1.59    0.25
   5  -8  -2    2.08    0.34
  -6   8   2    2.49    0.38
  -6   8   2    2.23    0.29
   6  -8  -2    2.18    0.37
   6  -8  -2    2.71    0.33
  -7   8   2   -0.11    0.17
  -7   8   2   -0.10    0.20
  -7   8   2    0.42    0.21
   7  -8  -2    0.26    0.25
   7  -8  -2   -0.15    0.22
  -8   8   2    0.54    0.24
  -8   8   2    1.07    0.28
   8  -8  -2    0.86    0.31
   8  -8  -2    0.63    0.30
  -9   8   2    6.17    0.49
  -9   8   2    5.52    0.53
   9  -8  -2    6.53    0.61
   9  -8  -2    5.55    0.64
 -10   8   2   10.25    0.64
 -10   8   2    9.99    0.67
  10  -8  -2    9.47    0.71
  10  -8  -2    9.79    0.79
 -11   8   2    2.12    0.59
 -11   8   2    2.47    0.43
  11  -8  -2    3.20    0.51
  11  -8  -2    2.34    0.54
 -12   8   2    2.20    0.65
 -12   8   2    2.14    0.44
  12  -8  -2    2.84    0.52
  12  -8  -2    2.94    0.62
 -13   8   2    5.11    0.91
 -13   8   2    4.50    0.59
  13  -8  -2    5.35    0.73
  13   9   2    1.40    0.52
 -13  -9  -2    0.75    0.53
 -13  -9  -2    0.03    0.47
  12   9   2    0.18    0.34
 -12  -9  -2    0.26    0.37
 -12  -9  -2   -0.07    0.48
  11   9   2    1.54    0.43
 -11  -9  -2    0.93    0.50
 -11  -9  -2    1.41    0.47
  10   9   2    1.75    0.47
 -10  -9  -2    1.20    0.48
 -10  -9  -2    0.98    0.45
   9   9   2   13.81    0.87
  -9  -9  -2   12.73    0.88
  -9  -9  -2   14.20    0.98
   8   9   2   21.06    1.00
  -8  -9  -2   19.45    1.00
  -8  -9  -2   23.10    1.18
   7   9   2   10.53    0.66
  -7  -9  -2   10.21    0.71
  -7  -9  -2   11.53    0.84
   6   9   2   22.02    0.93
  -6  -9  -2   22.96    1.08
  -6  -9  -2   22.00    0.94
   5   9   2   13.87    0.69
  -5  -9  -2   13.18    0.76
  -5  -9  -2   14.51    0.70
   4   9   2    3.98    0.40
  -4  -9  -2    4.36    0.47
  -4  -9  -2    4.05    0.39
   3   9   2    0.35    0.15
   3   9   2    0.56    0.20
  -3  -9  -2    0.47    0.22
  -3  -9  -2    0.34    0.16
   2   9   2    5.64    0.37
   2   9   2    5.85    0.38
  -2  -9  -2    5.79    0.36
  -2  -9  -2    6.28    0.47
   1   9   2  112.82    2.69
   1   9   2  117.97    2.49
  -1  -9  -2  112.33    2.45
  -1  -9  -2  115.27    2.71
   0   9   2  148.11    3.00
   0   9   2  139.88    3.33
   0  -9  -2  144.82    3.28
   0  -9  -2  145.04    3.00
  -1   9   2   42.32    1.09
  -1   9   2   43.14    1.36
   1  -9  -2   40.93    1.24
   1  -9  -2   43.43    1.10
  -2   9   2    0.57    0.23
   2  -9  -2    0.38    0.15
   2  -9  -2    0.58    0.20
   2  -9  -2    0.73    0.19
  -3   9   2   16.85    0.85
   3  -9  -2   18.09    0.71
   3  -9  -2   17.04    0.62
   3  -9  -2   16.72    0.71
  -4   9   2   66.78    1.56
  -4   9   2   64.09    2.00
   4  -9  -2   63.60    1.75
   4  -9  -2   65.75    1.61
  -5   9   2   15.89    0.91
  -5   9   2   15.29    0.60
  -5   9   2   14.78    0.70
   5  -9  -2   17.44    0.68
   5  -9  -2   15.05    0.74
  -6   9   2    1.47    0.42
  -6   9   2    1.76    0.27
  -6   9   2    1.79    0.35
   6  -9  -2    1.05    0.30
   6  -9  -2    1.24    0.28
  -7   9   2   14.63    0.97
  -7   9   2   15.99    0.68
   7  -9  -2   16.77    0.77
   7  -9  -2   15.87    0.83
  -8   9   2   31.07    1.48
  -8   9   2   30.09    1.03
   8  -9  -2   31.05    1.14
   8  -9  -2   33.54    1.31
  -9   9   2   12.99    1.00
  -9   9   2   14.10    0.76
  -9   9   2   13.27    0.69
   9  -9  -2   12.05    0.74
   9  -9  -2   13.75    0.88
 -10   9   2    1.38    0.33
 -10   9   2    1.37    0.52
  10  -9  -2    1.76    0.40
  10  -9  -2    1.63    0.47
 -11   9   2   13.87    0.77
 -11   9   2   14.23    1.16
  11  -9  -2   13.64    0.90
  11  -9  -2   13.66    0.99
 -12   9   2   -0.25    0.26
 -12   9   2    0.63    0.49
  12  -9  -2    0.52    0.39
  12  -9  -2   -0.01    0.42
 -13   9   2    0.81    0.57
 -13   9   2   -0.07    0.30
  13  -9  -2   -0.23    0.38
  12  10   2    0.04    0.40
 -12 -10  -2   -0.09    0.53
 -12 -10  -2    0.10    0.42
  11  10   2    2.14    0.53
 -11 -10  -2    1.77    0.64
 -11 -10  -2    1.52    0.48
  10  10   2    6.94    0.75
 -10 -10  -2    6.34    0.85
 -10 -10  -2    6.42    0.77
   9  10   2   11.97    0.83
  -9 -10  -2   11.60    0.82
  -9 -10  -2   13.57    0.98
   8  10   2    4.53    0.56
  -8 -10  -2    4.22    0.55
  -8 -10  -2    4.79    0.69
   7  10   2    7.14    0.66
  -7 -10  -2    7.09    0.65
  -7 -10  -2    6.75    0.76
   6  10   2   -0.01    0.24
  -6 -10  -2    0.23    0.23
  -6 -10  -2    0.15    0.28
   5  10   2    7.69    0.52
  -5 -10  -2    6.57    0.64
  -5 -10  -2    7.38    0.54
   4  10   2   12.79    0.64
  -4 -10  -2   13.40    0.65
  -4 -10  -2   13.46    0.75
   3  10   2   27.27    0.94
   3  10   2   29.02    0.93
  -3 -10  -2   29.41    0.95
  -3 -10  -2   28.22    1.08
   2  10   2   21.04    0.78
   2  10   2   21.83    0.77
   2  10   2   21.37    0.80
  -2 -10  -2   20.38    0.74
  -2 -10  -2   21.87    0.90
   1  10   2   10.21    0.56
   1  10   2   11.23    0.50
  -1 -10  -2   10.27    0.60
  -1 -10  -2    9.89    0.46
   0  10   2   34.72    1.16
   0  10   2   34.47    0.97
   0 -10  -2   33.11    0.96
   0 -10  -2   34.02    1.14
  -1  10   2    0.11    0.20
  -1  10   2   -0.04    0.12
  -1  10   2    0.02    0.06
   1 -10  -2    0.13    0.14
   1 -10  -2   -0.15    0.17
  -2  10   2   18.97    0.89
  -2  10   2   19.36    0.66
   2 -10  -2   17.50    0.76
   2 -10  -2   19.20    0.67
   2 -10  -2   18.77    0.75
  -3  10   2    0.03    0.08
  -3  10   2    0.37    0.27
   3 -10  -2    0.29    0.19
   3 -10  -2    0.41    0.18
  -4  10   2   12.56    0.80
   4 -10  -2   11.46    0.54
   4 -10  -2   11.87    0.65
  -5  10   2    7.73    0.44
  -5  10   2    9.09    0.74
   5 -10  -2    7.82    0.56
   5 -10  -2    7.99    0.50
  -6  10   2   11.43    0.87
  -6  10   2   12.97    0.58
   6 -10  -2   13.29    0.74
   6 -10  -2   14.15    0.66
  -7  10   2    0.49    0.35
  -7  10   2    0.41    0.22
   7 -10  -2   -0.08    0.24
   7 -10  -2    0.41    0.26
  -8  10   2    2.70    0.36
  -8  10   2    2.61    0.57
   8 -10  -2    2.45    0.46
   8 -10  -2    2.41    0.40
  -9  10   2    0.07    0.35
  -9  10   2    0.21    0.23
   9 -10  -2    0.12    0.32
   9 -10  -2    0.80    0.33
 -10  10   2    2.44    0.64
 -10  10   2    1.93    0.35
  10 -10  -2    2.17    0.49
  10 -10  -2    2.40    0.45
 -11  10   2    0.72    0.49
 -11  10   2   -0.44    0.24
  11 -10  -2    0.17    0.38
  11 -10  -2    0.23    0.34
 -12  10   2    1.64    0.38
 -12  10   2    1.96    0.67
  12 -10  -2    1.96    0.56
  12 -10  -2    1.74    0.50
  12  11   2   -0.02    0.39
 -12 -11  -2   -0.32    0.51
 -12 -11  -2    0.02    0.39
  11  11   2    2.18    0.53
 -11 -11  -2    2.31    0.61
 -11 -11  -2    1.86    0.59
  10  11   2   20.40    1.11
 -10 -11  -2   20.22    1.26
 -10 -11  -2   19.10    1.12
   9  11   2    0.93    0.39
  -9 -11  -2    1.91    0.59
  -9 -11  -2    1.35    0.45
   8  11   2    0.02    0.28
  -8 -11  -2   -0.26    0.29
  -8 -11  -2   -0.38    0.30
   7  11   2    6.67    0.64
  -7 -11  -2    5.63    0.63
  -7 -11  -2    6.00    0.75
   6  11   2    0.11    0.28
  -6 -11  -2    1.14    0.35
  -6 -11  -2    0.53    0.35
   5  11   2    5.35    0.53
  -5 -11  -2    6.13    0.67
  -5 -11  -2    4.90    0.52
   4  11   2    8.32    0.54
  -4 -11  -2    8.29    0.55
  -4 -11  -2    7.56    0.68
   3  11   2    7.29    0.45
   3  11   2    7.68    0.49
  -3 -11  -2    8.56    0.63
  -3 -11  -2    7.79    0.49
   2  11   2    2.67    0.33
   2  11   2    2.17    0.30
   2  11   2    2.05    0.31
  -2 -11  -2    2.18    0.29
  -2 -11  -2    1.70    0.33
   1  11   2   47.42    1.44
   1  11   2   47.32    1.29
  -1 -11  -2   46.82    1.48
  -1 -11  -2   48.59    1.29
   0  11   2    6.38    0.50
   0  11   2    6.61    0.40
   0 -11  -2    7.51    0.54
   0 -11  -2    7.18    0.43
  -1  11   2   -0.01    0.07
  -1  11   2    0.02    0.22
  -1  11   2   -0.02    0.14
   1 -11  -2    0.08    0.20
   1 -11  -2    0.04    0.13
  -2  11   2   10.44    0.68
  -2  11   2    9.49    0.48
   2 -11  -2    9.07    0.58
   2 -11  -2    9.99    0.50
  -3  11   2   11.72    0.76
   3 -11  -2   10.04    0.52
   3 -11  -2    9.82    0.61
  -4  11   2   11.23    0.79
   4 -11  -2   11.77    0.67
   4 -11  -2   10.98    0.57
  -5  11   2    2.84    0.53
   5 -11  -2    3.72    0.41
   5 -11  -2    2.87    0.43
  -6  11   2    7.23    0.45
  -6  11   2    8.81    0.88
   6 -11  -2    8.70    0.63
   6 -11  -2    8.66    0.57
  -7  11   2    1.22    0.26
  -7  11   2    0.75    0.41
   7 -11  -2    0.39    0.28
   7 -11  -2    0.30    0.30
  -8  11   2    1.35    0.51
  -8  11   2    1.69    0.31
   8 -11  -2    1.62    0.40
   8 -11  -2    1.56    0.36
  -9  11   2    0.69    0.41
  -9  11   2    0.97    0.27
   9 -11  -2    1.37    0.45
   9 -11  -2    0.67    0.30
 -10  11   2    0.55    0.29
 -10  11   2    1.10    0.51
  10 -11  -2    0.82    0.39
  10 -11  -2    0.79    0.36
 -11  11   2    0.18    0.49
 -11  11   2   -0.06    0.25
  11 -11  -2    0.07    0.35
  11 -11  -2    0.52    0.45
 -12  11   2    0.60    0.29
 -12  11   2    1.62    0.67
  12 -11  -2    0.83    0.49
  12 -11  -2    1.16    0.42
 -11 -12  -2    0.61    0.49
 -11 -12  -2    1.00    0.58
  10  12   2   -0.14    0.32
 -10 -12  -2    0.07    0.41
 -10 -12  -2    0.19    0.49
   9  12   2    8.10    0.79
  -9 -12  -2    7.22    0.82
  -9 -12  -2    7.36    0.93
   8  12   2    0.80    0.35
  -8 -12  -2    0.24    0.36
  -8 -12  -2    0.33    0.40
   7  12   2    1.65    0.37
  -7 -12  -2    2.13    0.46
  -7 -12  -2    0.80    0.41
   6  12   2   11.66    0.72
  -6 -12  -2   13.65    0.77
  -6 -12  -2   13.05    0.89
   5  12   2   31.70    1.16
  -5 -12  -2   31.78    1.17
  -5 -12  -2   32.77    1.37
   4  12   2    8.15    0.56
  -4 -12  -2    9.46    0.59
  -4 -12  -2    9.68    0.75
   3  12   2   12.99    0.62
   3  12   2   11.25    0.61
   3  12   2   13.22    0.64
  -3 -12  -2   13.54    0.81
  -3 -12  -2   13.18    0.65
   2  12   2   50.39    1.43
   2  12   2   52.50    1.49
   2  12   2   51.96    1.56
  -2 -12  -2   53.42    1.46
  -2 -12  -2   55.65    1.72
   1  12   2    0.14    0.18
   1  12   2    0.18    0.22
   1  12   2   -0.11    0.09
  -1 -12  -2    0.30    0.27
  -1 -12  -2    0.63    0.22
   0  12   2   -0.05    0.07
   0  12   2    0.17    0.22
   0  12   2    0.21    0.19
   0 -12  -2    0.00    0.23
   0 -12  -2   -0.14    0.17
  -1  12   2   -0.13    0.22
  -1  12   2   -0.16    0.08
  -1  12   2    0.21    0.19
   1 -12  -2    0.02    0.18
   1 -12  -2    0.22    0.21
  -2  12   2   77.76    2.33
  -2  12   2   80.18    1.90
   2 -12  -2   79.84    1.94
   2 -12  -2   82.02    2.20
  -3  12   2    3.05    0.34
  -3  12   2    3.80    0.58
   3 -12  -2    2.60    0.41
   3 -12  -2    3.43    0.37
  -4  12   2   14.12    0.95
   4 -12  -2   14.20    0.67
   4 -12  -2   14.84    0.79
  -5  12   2   67.86    2.31
   5 -12  -2   69.93    1.83
   5 -12  -2   70.44    2.06
  -6  12   2    0.74    0.42
   6 -12  -2    0.84    0.27
   6 -12  -2    0.81    0.31
  -7  12   2   31.21    1.57
   7 -12  -2   31.94    1.34
   7 -12  -2   34.20    1.20
  -8  12   2    0.88    0.48
  -8  12   2    0.56    0.23
   8 -12  -2    1.01    0.41
   8 -12  -2    1.06    0.32
  -9  12   2    2.18    0.63
  -9  12   2    2.82    0.37
   9 -12  -2    2.74    0.53
   9 -12  -2    2.39    0.45
 -10  12   2    6.90    1.00
 -10  12   2    5.91    0.52
  10 -12  -2    5.76    0.65
  10 -12  -2    5.89    0.78
 -11  12   2    0.51    0.54
 -11  12   2    0.44    0.27
  11 -12  -2    0.25    0.32
  11 -12  -2    0.46    0.43
 -11 -13  -2    0.85    0.47
 -11 -13  -2    0.93    0.56
 -10 -13  -2    0.81    0.43
 -10 -13  -2    0.95    0.58
  -9 -13  -2    0.56    0.44
  -9 -13  -2    1.16    0.55
   8  13   2    1.70    0.43
  -8 -13  -2    1.91    0.57
  -8 -13  -2    1.26    0.41
   7  13   2    0.16    0.34
  -7 -13  -2    0.70    0.33
  -7 -13  -2   -0.04    0.40
   6  13   2   16.42    0.86
  -6 -13  -2   14.13    0.86
  -6 -13  -2   16.10    1.03
   5  13   2    5.11    0.55
  -5 -13  -2    5.77    0.59
  -5 -13  -2    5.08    0.65
   4  13   2   11.60    0.68
  -4 -13  -2   13.28    0.85
  -4 -13  -2   12.60    0.70
   3  13   2   14.75    0.70
   3  13   2   14.54    0.72
  -3 -13  -2   14.37    0.73
  -3 -13  -2   13.66    0.85
   2  13   2   25.39    1.00
   2  13   2   25.02    0.91
  -2 -13  -2   26.83    1.16
  -2 -13  -2   23.81    0.92
   1  13   2    2.96    0.43
   1  13   2    3.21    0.38
  -1 -13  -2    2.71    0.47
  -1 -13  -2    3.35    0.39
   0  13   2   52.49    1.43
   0  13   2   52.57    1.70
   0 -13  -2   51.99    1.46
   0 -13  -2   52.52    1.71
  -1  13   2    4.62    0.41
  -1  13   2    4.00    0.55
   1 -13  -2    4.63    0.44
   1 -13  -2    4.77    0.55
  -2  13   2   13.40    0.62
  -2  13   2   14.48    0.90
   2 -13  -2   15.22    0.83
   2 -13  -2   14.13    0.67
  -3  13   2   16.16    0.68
  -3  13   2   16.73    0.99
   3 -13  -2   15.85    0.73
   3 -13  -2   17.14    0.87
  -4  13   2    8.02    0.84
   4 -13  -2    8.28    0.55
   4 -13  -2    9.23    0.67
  -5  13   2    3.94    0.69
   5 -13  -2    4.90    0.59
   5 -13  -2    4.36    0.46
  -6  13   2    3.45    0.64
   6 -13  -2    3.64    0.44
   6 -13  -2    3.19    0.54
  -7  13   2   19.69    1.26
   7 -13  -2   19.25    0.91
   7 -13  -2   20.54    1.07
  -8  13   2    6.00    0.87
   8 -13  -2    5.81    0.61
   8 -13  -2    3.54    0.60
  -9  13   2   12.10    1.25
   9 -13  -2   11.93    0.89
   9 -13  -2   12.35    0.78
 -10  13   2    2.92    0.72
  10 -13  -2    4.05    0.68
  10 -13  -2    4.01    0.59
 -11  13   2    1.15    0.27
 -11  13   2    1.46    0.63
  11 -13  -2    1.20    0.49
  11 -13  -2    1.65    0.54
 -10 -14  -2   -0.35    0.36
 -10 -14  -2   -0.32    0.41
  -9 -14  -2    1.86    0.56
  -9 -14  -2    1.42    0.59
  -8 -14  -2   38.81    1.79
  -8 -14  -2   37.95    1.57
  -7 -14  -2    2.54    0.52
  -7 -14  -2    3.90    0.68
  -6 -14  -2    3.16    0.59
  -6 -14  -2    2.35    0.45
   5  14   2    0.24    0.30
  -5 -14  -2    0.13    0.25
  -5 -14  -2    0.42    0.39
   4  14   2    0.56    0.28
  -4 -14  -2    0.66    0.33
  -4 -14  -2    0.25    0.38
   3  14   2    3.28    0.40
   3  14   2    3.20    0.42
  -3 -14  -2    2.89    0.41
  -3 -14  -2    2.75    0.49
   2  14   2    0.29    0.22
   2  14   2    0.34    0.24
  -2 -14  -2    0.32    0.24
  -2 -14  -2    0.01    0.24
   1  14   2    0.10    0.25
   1  14   2    0.19    0.22
  -1 -14  -2    0.44    0.31
  -1 -14  -2    0.33    0.21
   0  14   2   53.63    1.77
   0 -14  -2   52.18    1.75
   0 -14  -2   51.64    1.50
  -1  14   2    7.17    0.72
   1 -14  -2    6.01    0.64
   1 -14  -2    6.92    0.48
  -2  14   2    2.10    0.50
   2 -14  -2    2.10    0.43
   2 -14  -2    2.38    0.36
  -3  14   2    5.15    0.68
   3 -14  -2    4.57    0.57
   3 -14  -2    4.75    0.47
  -4  14   2   13.39    0.96
   4 -14  -2   12.58    0.66
   4 -14  -2   12.37    0.78
  -5  14   2    0.14    0.36
   5 -14  -2    0.41    0.33
   5 -14  -2    0.67    0.28
  -6  14   2    7.51    0.96
   6 -14  -2    6.46    0.60
   6 -14  -2    6.58    0.71
  -7  14   2    0.34    0.40
   7 -14  -2    0.48    0.31
   7 -14  -2    0.47    0.35
  -8  14   2    0.45    0.46
   8 -14  -2    0.43    0.41
   8 -14  -2    0.76    0.32
  -9  14   2    2.24    0.70
   9 -14  -2    0.96    0.47
   9 -14  -2    0.92    0.39
 -10  14   2    1.40    0.68
  10 -14  -2    2.82    0.54
  10 -14  -2    1.17    0.48
  -9 -15  -2    0.78    0.49
  -9 -15  -2    0.77    0.45
  -8 -15  -2    0.44    0.38
  -8 -15  -2    0.66    0.54
  -7 -15  -2    1.70    0.53
  -7 -15  -2    1.35    0.42
  -6 -15  -2   11.90    0.95
  -6 -15  -2   11.83    0.81
  -5 -15  -2   43.27    1.79
  -5 -15  -2   41.17    1.52
  -4 -15  -2    0.26    0.30
  -4 -15  -2    0.46    0.40
  -3 -15  -2   20.74    1.16
  -3 -15  -2   22.15    0.97
   2  15   2    0.16    0.26
  -2 -15  -2    0.10    0.24
  -2 -15  -2    0.30    0.34
   1  15   2    2.86    0.46
  -1 -15  -2    2.55    0.50
  -1 -15  -2    4.13    0.48
   0  15   2   18.64    0.98
   0 -15  -2   18.28    1.01
   0 -15  -2   17.34    0.81
  -1  15   2    0.39    0.33
   1 -15  -2   -0.17    0.21
   1 -15  -2   -0.28    0.29
  -2  15   2    5.31    0.68
   2 -15  -2    5.52    0.52
   2 -15  -2    5.23    0.63
  -3  15   2    0.25    0.38
   3 -15  -2    0.33    0.25
   3 -15  -2    0.12    0.29
  -4  15   2    3.87    0.68
   4 -15  -2    2.96    0.50
   4 -15  -2    2.81    0.42
  -5  15   2    8.99    0.98
   5 -15  -2    9.50    0.77
   5 -15  -2   11.02    0.68
  -6  15   2   13.02    1.06
   6 -15  -2   12.22    0.88
   6 -15  -2   12.71    0.76
  -7  15   2   14.23    1.35
   7 -15  -2   13.72    0.84
   7 -15  -2   15.12    0.97
  -8  15   2   14.91    1.42
   8 -15  -2   14.88    0.91
   8 -15  -2   16.75    1.09
  -9  15   2    0.32    0.53
   9 -15  -2    1.06    0.50
   9 -15  -2    1.74    0.45
  -9 -16  -2    7.10    0.90
  -8 -16  -2    2.04    0.52
  -8 -16  -2    1.32    0.62
  -7 -16  -2    0.54    0.45
  -7 -16  -2   -0.20    0.29
  -6 -16  -2    0.78    0.40
  -6 -16  -2    0.06    0.45
  -5 -16  -2   13.72    0.88
  -5 -16  -2   12.11    1.00
  -4 -16  -2    1.39    0.52
  -4 -16  -2    1.87    0.42
  -3 -16  -2    0.59    0.42
  -3 -16  -2   -0.29    0.23
  -2 -16  -2    4.18    0.50
  -2 -16  -2    3.85    0.61
   1  16   2    5.17    0.60
  -1 -16  -2    7.43    0.79
  -1 -16  -2    6.24    0.60
   0  16   2    0.07    0.30
   0 -16  -2    0.69    0.36
   0 -16  -2    0.15    0.25
  -1  16   2    0.24    0.34
   1 -16  -2    1.08    0.41
   1 -16  -2    0.85    0.29
  -2  16   2    0.30    0.32
   2 -16  -2    0.32    0.25
   2 -16  -2   -0.17    0.28
  -3  16   2   11.24    0.90
   3 -16  -2   10.73    0.68
   3 -16  -2   11.24    0.82
  -4  16   2    1.59    0.50
   4 -16  -2    1.85    0.46
   4 -16  -2    1.65    0.37
  -5  16   2   -0.02    0.41
   5 -16  -2    0.50    0.36
   5 -16  -2   -0.28    0.25
  -6  16   2    4.44    0.80
   6 -16  -2    4.15    0.62
   6 -16  -2    4.37    0.53
  -7  16   2    9.01    1.13
   7 -16  -2   10.06    0.96
   7 -16  -2    9.14    0.72
  -8  16   2    5.29    0.91
   8 -16  -2    5.68    0.81
   8 -16  -2    5.64    0.68
  -9  16   2    9.85    1.27
   9 -16  -2    9.14    0.83
   9 -16  -2   11.03    1.06
  -8 -17  -2    1.27    0.59
  -8 -17  -2    1.07    0.53
  -7 -17  -2    6.33    0.95
  -7 -17  -2    4.81    0.71
  -6 -17  -2   -0.15    0.33
  -6 -17  -2    0.08    0.41
  -5 -17  -2   -0.30    0.40
  -5 -17  -2   -0.03    0.34
  -4 -17  -2    0.55    0.37
  -4 -17  -2    1.07    0.44
  -3 -17  -2    1.55    0.50
  -3 -17  -2    0.37    0.32
  -2 -17  -2    5.68    0.75
  -2 -17  -2    3.43    0.47
   1  17   2    1.00    0.36
  -1 -17  -2    0.50    0.26
  -1 -17  -2    0.63    0.40
   0  17   2    0.56    0.35
   0 -17  -2   -0.19    0.20
   0 -17  -2   -0.11    0.27
  -1  17   2    4.34    0.66
   1 -17  -2    4.78    0.54
   1 -17  -2    4.45    0.66
  -2  17   2    3.54    0.64
   2 -17  -2    3.15    0.47
   2 -17  -2    2.82    0.56
  -3  17   2    0.46    0.40
   3 -17  -2   -0.34    0.31
   3 -17  -2   -0.11    0.26
  -4  17   2    1.12    0.55
   4 -17  -2    0.94    0.41
   4 -17  -2    0.48    0.32
  -5  17   2   13.51    1.11
   5 -17  -2   15.29    1.01
   5 -17  -2   15.24    0.86
  -6  17   2    9.02    1.14
   6 -17  -2    6.32    0.68
   6 -17  -2    9.02    0.91
  -7  17   2    0.73    0.55
   7 -17  -2    0.17    0.31
   7 -17  -2    1.21    0.46
  -8  17   2    4.30    0.91
   8 -17  -2    2.77    0.64
   8 -17  -2    2.98    0.53
  -6 -18  -2    3.87    0.68
  -6 -18  -2    3.29    0.74
  -5 -18  -2    1.17    0.54
  -5 -18  -2    0.78    0.39
  -4 -18  -2   19.78    1.31
  -4 -18  -2   17.91    1.04
  -3 -18  -2   -0.22    0.29
  -3 -18  -2    0.15    0.36
  -2 -18  -2    0.20    0.30
  -2 -18  -2    0.07    0.40
  -1 -18  -2    0.32    0.31
  -1 -18  -2    0.28    0.38
   0  18   2    7.28    0.80
   0 -18  -2    7.16    0.68
   0 -18  -2    6.16    0.75
  -1  18   2    2.23    0.56
   1 -18  -2    1.76    0.41
   1 -18  -2    2.06    0.54
  -2  18   2   10.02    0.99
   2 -18  -2   10.20    0.73
   2 -18  -2    8.84    0.90
  -3  18   2    0.17    0.45
   3 -18  -2    0.34    0.35
   3 -18  -2    0.92    0.37
  -4  18   2    2.94    0.67
   4 -18  -2    2.44    0.46
   4 -18  -2    3.77    0.64
  -5  18   2    0.50    0.51
   5 -18  -2    0.18    0.32
   5 -18  -2    0.00    0.35
  -6  18   2    0.90    0.54
   6 -18  -2   -0.05    0.33
   6 -18  -2   -0.16    0.27
  -5 -19  -2    0.65    0.43
  -5 -19  -2    0.05    0.51
  -4 -19  -2    5.93    0.75
  -4 -19  -2    5.69    0.85
  -3 -19  -2    0.43    0.46
  -3 -19  -2    0.91    0.41
  -2 -19  -2    0.24    0.33
  -2 -19  -2    0.03    0.38
  -1 -19  -2   -0.02    0.32
  -1 -19  -2    0.35    0.38
   0 -19  -2    3.35    0.66
   0 -19  -2    3.33    0.52
  -1  19   2    0.37    0.44
   1 -19  -2    0.85    0.36
   1 -19  -2    0.15    0.36
  -2  19   2    5.97    0.86
   2 -19  -2    7.26    0.72
   2 -19  -2    5.44    0.77
  -3  19   2    1.68    0.56
   3 -19  -2    2.20    0.52
   3 -19  -2    2.02    0.46
  -4  19   2    6.35    0.95
   4 -19  -2    6.04    0.81
   4 -19  -2    4.45    0.61
  -5  19   2    2.60    0.69
   5 -19  -2    3.26    0.67
   5 -19  -2    3.53    0.56
  -3 -20  -2    0.42    0.40
  -2 -20  -2    0.81    0.53
  -2 -20  -2    0.22    0.33
  -1 -20  -2    5.83    0.86
  -1 -20  -2    6.66    0.75
   0 -20  -2    0.95    0.39
   0 -20  -2    0.63    0.44
   1 -20  -2   -0.30    0.39
   1 -20  -2    0.66    0.37
  -2  20   2   -0.07    0.42
   2 -20  -2    0.91    0.41
   2 -20  -2    0.48    0.47
   3 -20  -2   11.72    0.86
   2 -20   3    3.28    0.68
   2 -20   3    3.98    0.63
   1 -20   3    0.97    0.45
   1 -20   3    1.41    0.59
   0 -20   3    2.75    0.56
   0 -20   3    1.95    0.65
  -1 -20   3   -0.04    0.42
  -1 -20   3   -0.04    0.35
  -2 -20   3    2.40    0.62
  -2 -20   3    1.03    0.44
  -3 -20   3    4.46    0.65
   5 -19   3    4.80    0.66
   5 -19   3    4.76    0.79
  -5  19  -3    4.95    0.87
   4 -19   3    1.90    0.44
   4 -19   3    1.44    0.54
  -4  19  -3    2.75    0.68
   3 -19   3    3.29    0.57
   3 -19   3    3.00    0.63
  -3  19  -3    2.66    0.61
   2 -19   3    6.24    0.83
   2 -19   3    4.74    0.63
  -2  19  -3    5.47    0.78
   1 -19   3    0.09    0.36
   1 -19   3    0.75    0.36
   0 -19   3    3.26    0.52
   0 -19   3    2.48    0.64
  -1 -19   3    0.29    0.35
  -1 -19   3    1.20    0.57
  -2 -19   3    0.26    0.37
  -2 -19   3   -0.34    0.35
  -3 -19   3    0.75    0.36
  -3 -19   3    0.92    0.57
  -4 -19   3    1.72    0.46
  -4 -19   3    1.09    0.63
  -5 -19   3    4.76    0.73
  -5 -19   3    4.08    0.81
   6 -18   3   -0.22    0.42
   6 -18   3   -0.01    0.35
  -6  18  -3    0.10    0.43
   5 -18   3    7.03    0.88
   5 -18   3    7.10    0.75
  -5  18  -3    7.34    0.99
   4 -18   3    7.81    0.77
   4 -18   3    9.14    0.95
  -4  18  -3    8.58    1.01
   3 -18   3    1.60    0.38
   3 -18   3    0.10    0.41
  -3  18  -3    0.82    0.47
   2 -18   3   -0.39    0.35
   2 -18   3   -0.24    0.24
  -2  18  -3    0.09    0.37
   1 -18   3    1.17    0.45
   1 -18   3    0.62    0.34
  -1  18  -3    1.75    0.48
   0 -18   3    0.52    0.39
   0 -18   3    0.22    0.32
  -1 -18   3   24.78    1.14
  -1 -18   3   26.97    1.44
  -2 -18   3    0.61    0.37
  -2 -18   3   -0.29    0.37
  -3 -18   3   15.80    0.94
  -3 -18   3   16.35    1.15
  -4 -18   3    0.43    0.39
  -4 -18   3    0.20    0.41
  -5 -18   3   -0.06    0.49
  -5 -18   3    0.34    0.34
  -6 -18   3    0.76    0.60
  -6 -18   3    0.94    0.45
   8 -17   3    2.93    0.54
   7 -17   3    0.78    0.42
   7 -17   3    0.06    0.35
  -7  17  -3    0.16    0.47
   6 -17   3   -0.03    0.29
   6 -17   3    0.53    0.45
  -6  17  -3    0.00    0.42
   5 -17   3    0.28    0.37
   5 -17   3    0.05    0.29
  -5  17  -3   -0.35    0.32
   4 -17   3    0.98    0.42
   4 -17   3    0.91    0.39
  -4  17  -3    2.06    0.59
   3 -17   3   13.13    0.94
   3 -17   3   12.03    0.76
  -3  17  -3   12.55    0.96
   2 -17   3   -0.04    0.34
   2 -17   3    0.35    0.32
  -2  17  -3    0.12    0.31
   1 -17   3    1.30    0.38
   1 -17   3    1.52    0.51
  -1  17  -3    1.88    0.48
   0 -17   3    2.76    0.56
   0 -17   3    1.97    0.40
   0  17  -3    2.96    0.50
  -1 -17   3    1.71    0.49
  -1 -17   3    2.44    0.45
  -2 -17   3    2.65    0.47
  -2 -17   3    2.38    0.56
  -3 -17   3    2.17    0.48
  -3 -17   3    2.52    0.64
  -4 -17   3   -0.50    0.32
  -4 -17   3    0.37    0.35
  -5 -17   3    0.16    0.31
  -5 -17   3    0.02    0.43
  -6 -17   3    7.05    0.82
  -6 -17   3    8.27    1.00
  -7 -17   3    4.23    0.81
  -7 -17   3    5.08    0.73
  -8 -17   3    0.03    0.47
  -8 -17   3    0.59    0.50
   9 -16   3    0.06    0.34
   8 -16   3    1.13    0.47
   8 -16   3    0.95    0.40
  -8  16  -3    0.60    0.55
   7 -16   3    0.15    0.28
   7 -16   3    0.05    0.41
  -7  16  -3    0.40    0.46
   6 -16   3    0.48    0.45
   6 -16   3    0.47    0.31
  -6  16  -3    0.54    0.46
   5 -16   3    0.30    0.33
   5 -16   3    0.02    0.24
  -5  16  -3    0.91    0.53
   4 -16   3    1.47    0.35
   4 -16   3    1.69    0.49
  -4  16  -3    1.23    0.49
   3 -16   3   -0.50    0.28
   3 -16   3   -0.22    0.21
  -3  16  -3    0.18    0.37
   2 -16   3    7.30    0.58
   2 -16   3    8.43    0.85
  -2  16  -3    9.64    0.90
   1 -16   3    6.25    0.73
   1 -16   3    8.38    0.64
  -1  16  -3    8.43    0.82
   0 -16   3    2.69    0.42
   0 -16   3    1.93    0.49
   0  16  -3    2.45    0.48
  -1 -16   3    6.58    0.64
  -1 -16   3    6.66    0.79
   1  16  -3    8.08    0.62
  -2 -16   3    8.03    0.86
  -2 -16   3   10.37    0.70
   2  16  -3    8.81    0.75
  -3 -16   3   -0.38    0.26
  -3 -16   3   -0.12    0.23
   3  16  -3   -0.46    0.24
  -4 -16   3   -0.51    0.39
  -4 -16   3   -0.26    0.29
   4  16  -3   -0.27    0.26
  -5 -16   3   -0.12    0.26
  -5 -16   3   -0.01    0.37
  -6 -16   3   10.46    1.09
  -6 -16   3   12.69    0.93
  -7 -16   3    0.81    0.56
  -7 -16   3    1.00    0.44
  -8 -16   3    3.19    0.63
  -8 -16   3    1.93    0.63
  -9 -16   3    1.15    0.57
  -9 -16   3    2.58    0.63
   9 -15   3    1.93    0.46
   9 -15   3    2.28    0.61
  -9  15  -3    2.36    0.45
  -9  15  -3    2.37    0.77
   8 -15   3   -0.32    0.26
   8 -15   3    0.39    0.41
  -8  15  -3   -0.10    0.50
   7 -15   3    1.98    0.42
   7 -15   3    1.88    0.54
  -7  15  -3    2.36    0.65
   6 -15   3    0.24    0.26
   6 -15   3   -0.21    0.27
  -6  15  -3    0.23    0.42
   5 -15   3    4.75    0.67
   5 -15   3    4.63    0.54
  -5  15  -3    4.84    0.78
   4 -15   3   18.91    1.04
   4 -15   3   17.91    0.89
  -4  15  -3   18.10    1.12
   3 -15   3    0.98    0.33
   3 -15   3    1.50    0.44
  -3  15  -3    0.46    0.30
  -3  15  -3    1.00    0.40
   2 -15   3    1.92    0.44
   2 -15   3    2.40    0.40
  -2  15  -3    2.21    0.41
  -2  15  -3    2.49    0.50
   1 -15   3    0.38    0.30
   1 -15   3    0.01    0.27
  -1  15  -3    0.86    0.34
  -1  15  -3    0.33    0.26
   0 -15   3   17.15    0.98
   0 -15   3   16.47    0.83
   0  15  -3   18.09    0.92
   0  15  -3   15.81    0.80
  -1 -15   3    5.78    0.68
  -1 -15   3    5.44    0.54
   1  15  -3    6.57    0.61
   1  15  -3    5.93    0.59
  -2 -15   3   12.81    0.92
  -2 -15   3   11.67    0.73
   2  15  -3   12.70    0.75
  -3 -15   3    0.78    0.30
  -3 -15   3   -0.06    0.37
   3  15  -3    0.64    0.31
  -4 -15   3    0.63    0.43
  -4 -15   3    0.58    0.30
   4  15  -3    0.64    0.33
  -5 -15   3    0.14    0.35
  -5 -15   3    0.60    0.33
   5  15  -3   -0.15    0.28
  -6 -15   3    1.34    0.41
  -6 -15   3    0.37    0.39
   6  15  -3    1.12    0.40
  -7 -15   3    9.41    1.07
  -7 -15   3    8.41    0.84
   7  15  -3    7.72    0.80
  -8 -15   3    0.11    0.42
  -8 -15   3   -0.36    0.30
   8  15  -3   -0.02    0.30
  -9 -15   3    0.73    0.50
  -9 -15   3   -0.40    0.32
  10 -14   3    1.35    0.41
  10 -14   3    1.31    0.55
 -10  14  -3    1.18    0.63
 -10  14  -3    1.29    0.40
   9 -14   3    0.58    0.32
   9 -14   3    0.67    0.43
  -9  14  -3    1.01    0.53
  -9  14  -3    1.23    0.37
   8 -14   3    0.02    0.32
   8 -14   3   -0.01    0.30
  -8  14  -3   -0.20    0.26
  -8  14  -3    0.08    0.43
   7 -14   3   14.30    0.86
   7 -14   3   15.24    0.99
  -7  14  -3   12.63    1.25
  -7  14  -3   15.49    0.82
   6 -14   3    2.48    0.53
   6 -14   3    1.92    0.41
  -6  14  -3    1.81    0.54
   5 -14   3    0.28    0.24
   5 -14   3    0.54    0.32
  -5  14  -3    0.78    0.39
   4 -14   3    1.68    0.40
   4 -14   3    1.16    0.34
  -4  14  -3    1.71    0.53
   3 -14   3    8.52    0.68
   3 -14   3    9.12    0.61
  -3  14  -3    9.00    0.86
   2 -14   3    4.76    0.60
   2 -14   3    5.31    0.54
  -2  14  -3    4.85    0.61
  -2  14  -3    5.96    0.55
   1 -14   3   17.82    0.83
   1 -14   3   19.26    1.02
  -1  14  -3   18.39    0.83
  -1  14  -3   18.82    0.97
   0 -14   3   10.16    0.75
   0 -14   3   10.62    0.64
   0  14  -3   10.48    0.71
   0  14  -3   10.00    0.63
  -1 -14   3   31.77    1.36
  -1 -14   3   29.57    1.11
   1  14  -3   31.38    1.17
   1  14  -3   33.19    1.17
  -2 -14   3    0.47    0.24
  -2 -14   3    0.47    0.37
   2  14  -3    0.59    0.24
   2  14  -3    0.52    0.29
  -3 -14   3   12.68    0.72
  -3 -14   3   14.64    0.95
   3  14  -3   12.48    0.75
  -4 -14   3   10.74    0.87
  -4 -14   3   10.03    0.67
   4  14  -3    9.48    0.68
  -5 -14   3   -0.18    0.23
  -5 -14   3   -0.12    0.35
   5  14  -3   -0.20    0.27
  -6 -14   3    1.11    0.38
  -6 -14   3    0.75    0.43
   6  14  -3    1.89    0.42
  -7 -14   3    0.03    0.36
  -7 -14   3   -0.06    0.30
   7  14  -3    0.11    0.29
  -8 -14   3    1.18    0.48
  -8 -14   3    1.15    0.54
   8  14  -3    1.02    0.38
  -9 -14   3    2.56    0.60
  -9 -14   3    3.49    0.73
   9  14  -3    2.42    0.53
 -10 -14   3    5.56    0.89
 -10 -14   3    6.67    0.85
  10  14  -3    5.86    0.78
  11 -13   3    0.41    0.46
  11 -13   3    0.08    0.30
 -11  13  -3    0.17    0.34
 -11  13  -3    0.90    0.57
  10 -13   3    5.07    0.75
  10 -13   3    5.88    0.71
 -10  13  -3    4.89    0.60
 -10  13  -3    5.34    0.91
   9 -13   3   -0.15    0.31
   9 -13   3    0.24    0.35
  -9  13  -3    0.72    0.34
  -9  13  -3    0.09    0.41
   8 -13   3    5.12    0.70
   8 -13   3    4.72    0.58
  -8  13  -3    5.29    0.58
  -8  13  -3    4.92    0.81
   7 -13   3    0.81    0.36
   7 -13   3    0.53    0.29
  -7  13  -3    0.36    0.28
  -7  13  -3    0.39    0.42
   6 -13   3    2.55    0.41
   6 -13   3    3.20    0.52
  -6  13  -3    2.71    0.59
  -6  13  -3    4.05    0.49
   5 -13   3    2.84    0.48
   5 -13   3    3.06    0.43
  -5  13  -3    3.20    0.59
  -5  13  -3    2.60    0.40
   4 -13   3    2.29    0.43
   4 -13   3    2.54    0.40
  -4  13  -3    2.63    0.53
   3 -13   3   13.07    0.70
   3 -13   3   15.53    0.86
  -3  13  -3   13.29    0.87
   2 -13   3    1.88    0.35
   2 -13   3    2.35    0.43
  -2  13  -3    1.39    0.31
  -2  13  -3    1.46    0.41
  -2  13  -3    1.98    0.35
   1 -13   3   18.28    0.80
   1 -13   3   18.39    0.95
  -1  13  -3   19.24    0.84
  -1  13  -3   19.57    0.84
  -1  13  -3   19.16    0.94
   0 -13   3   82.04    2.39
   0 -13   3   82.45    2.10
   0  13  -3   83.03    2.27
   0  13  -3   81.74    2.18
   0  13  -3   84.66    2.13
  -1 -13   3    1.75    0.33
  -1 -13   3    1.05    0.35
   1  13  -3    1.37    0.31
   1  13  -3    1.07    0.29
   1  13  -3    0.87    0.28
  -2 -13   3   -0.16    0.27
  -2 -13   3    0.32    0.25
   2  13  -3    0.03    0.23
   2  13  -3    0.17    0.20
   2  13  -3    0.01    0.23
  -3 -13   3    3.19    0.52
  -3 -13   3    4.59    0.50
   3  13  -3    3.58    0.46
   3  13  -3    4.62    0.51
  -4 -13   3    4.37    0.51
  -4 -13   3    4.23    0.64
   4  13  -3    4.31    0.52
  -5 -13   3    4.22    0.52
  -5 -13   3    5.05    0.67
   5  13  -3    4.90    0.56
  -6 -13   3    0.02    0.36
  -6 -13   3    0.10    0.26
   6  13  -3    0.74    0.36
  -7 -13   3    0.77    0.38
  -7 -13   3    0.35    0.37
   7  13  -3    0.38    0.34
  -8 -13   3    7.72    0.90
  -8 -13   3    7.96    0.82
   8  13  -3    9.06    0.85
  -9 -13   3    0.20    0.41
  -9 -13   3    0.76    0.49
   9  13  -3   -0.15    0.36
 -10 -13   3   -0.23    0.33
 -10 -13   3    0.01    0.39
  10  13  -3   -0.27    0.29
 -11 -13   3    6.81    0.95
 -11 -13   3    5.63    0.80
  11  13  -3    4.99    0.77
  11 -12   3    0.28    0.34
  11 -12   3   -0.05    0.31
 -11  12  -3   -0.29    0.30
 -11  12  -3    0.67    0.51
  10 -12   3    4.36    0.73
  10 -12   3    3.31    0.56
 -10  12  -3    3.88    0.54
   9 -12   3    0.97    0.33
   9 -12   3    0.51    0.40
  -9  12  -3    1.08    0.35
   8 -12   3    0.51    0.33
   8 -12   3    0.37    0.31
  -8  12  -3    0.26    0.28
   7 -12   3    4.85    0.63
   7 -12   3    4.90    0.55
  -7  12  -3    4.53    0.51
   6 -12   3   11.20    0.78
   6 -12   3   12.85    0.73
  -6  12  -3   12.26    0.70
   5 -12   3    0.92    0.32
   5 -12   3    0.49    0.25
  -5  12  -3    0.65    0.27
   4 -12   3   49.65    1.46
   4 -12   3   48.44    1.64
  -4  12  -3   50.38    1.51
  -4  12  -3   49.53    1.82
  -4  12  -3   53.11    1.60
   3 -12   3    0.24    0.20
   3 -12   3    0.41    0.26
  -3  12  -3    0.08    0.20
  -3  12  -3    0.09    0.26
   2 -12   3    0.14    0.23
   2 -12   3    0.49    0.22
  -2  12  -3    0.03    0.26
  -2  12  -3   -0.21    0.15
   1 -12   3   40.89    1.44
   1 -12   3   39.54    1.22
  -1  12  -3   40.23    1.28
  -1  12  -3   43.31    1.44
  -1  12  -3   41.06    1.26
   0 -12   3   16.47    0.86
   0 -12   3   16.49    0.72
   0  12  -3   17.71    0.81
   0  12  -3   16.20    0.75
   0  12  -3   17.10    0.75
  -1 -12   3   28.23    1.18
  -1 -12   3   29.37    1.01
   1  12  -3   29.99    1.04
   1  12  -3   28.91    1.05
   1  12  -3   30.47    1.05
  -2 -12   3   59.62    1.62
  -2 -12   3   58.91    1.87
   2  12  -3   56.02    1.63
   2  12  -3   57.43    1.69
   2  12  -3   57.61    1.57
  -3 -12   3   18.67    0.97
  -3 -12   3   17.32    0.80
   3  12  -3   17.85    0.84
   3  12  -3   17.84    0.65
  -4 -12   3    9.55    0.74
  -4 -12   3   10.04    0.63
   4  12  -3   11.38    0.70
  -5 -12   3   41.66    1.43
  -5 -12   3   43.51    1.64
   5  12  -3   43.65    1.45
  -6 -12   3    5.37    0.58
  -6 -12   3    4.16    0.61
   6  12  -3    5.34    0.60
  -7 -12   3    7.70    0.82
  -7 -12   3    6.34    0.67
   7  12  -3    5.65    0.62
  -8 -12   3    1.05    0.42
  -8 -12   3    0.55    0.40
   8  12  -3    0.40    0.34
  -9 -12   3    4.61    0.74
  -9 -12   3    4.27    0.63
   9  12  -3    4.52    0.66
 -10 -12   3    0.36    0.43
 -10 -12   3    0.33    0.43
  10  12  -3    0.17    0.32
 -11 -12   3   -0.38    0.40
 -11 -12   3    0.02    0.46
  11  12  -3   -0.18    0.37
  12 -11   3    0.15    0.33
  12 -11   3   -0.02    0.38
 -12  11  -3    0.34    0.37
  11 -11   3    0.40    0.35
  11 -11   3    0.68    0.44
 -11  11  -3    0.75    0.35
  10 -11   3    4.39    0.68
  10 -11   3    4.61    0.59
 -10  11  -3    4.68    0.56
   9 -11   3    3.05    0.56
   9 -11   3    2.94    0.49
  -9  11  -3    3.71    0.49
   8 -11   3    5.71    0.68
   8 -11   3    6.31    0.61
  -8  11  -3    5.52    0.57
   7 -11   3    0.93    0.39
   7 -11   3    1.00    0.33
  -7  11  -3    1.08    0.32
   6 -11   3    3.75    0.46
   6 -11   3    4.45    0.55
  -6  11  -3    4.49    0.50
   5 -11   3   10.88    0.61
   5 -11   3   11.35    0.74
  -5  11  -3   11.69    0.72
  -5  11  -3   11.29    0.63
   4 -11   3   24.80    0.91
   4 -11   3   23.74    1.03
  -4  11  -3   23.81    0.97
  -4  11  -3   23.69    0.92
   3 -11   3   16.11    0.80
   3 -11   3   14.81    0.67
  -3  11  -3   16.34    0.73
  -3  11  -3   15.11    0.72
  -3  11  -3   15.97    0.87
   2 -11   3    3.31    0.43
   2 -11   3    3.27    0.35
  -2  11  -3    3.55    0.48
  -2  11  -3    3.40    0.38
   1 -11   3   33.31    1.22
   1 -11   3   33.46    1.04
  -1  11  -3   33.63    1.21
  -1  11  -3   34.26    1.11
  -1  11  -3   33.68    1.07
   0 -11   3    3.68    0.45
   0 -11   3    3.41    0.36
   0  11  -3    3.57    0.39
   0  11  -3    3.35    0.40
   0  11  -3    3.03    0.38
  -1 -11   3    0.14    0.24
  -1 -11   3    0.37    0.20
   1  11  -3    0.26    0.21
   1  11  -3    0.01    0.17
   1  11  -3   -0.18    0.15
  -2 -11   3   10.29    0.70
  -2 -11   3    9.70    0.54
   2  11  -3   10.48    0.50
   2  11  -3   10.20    0.58
   2  11  -3   11.06    0.61
  -3 -11   3    0.96    0.32
  -3 -11   3    1.08    0.25
   3  11  -3    0.65    0.27
   3  11  -3    1.36    0.21
  -4 -11   3    4.76    0.48
  -4 -11   3    4.92    0.58
   4  11  -3    6.25    0.58
  -5 -11   3    7.21    0.62
  -5 -11   3    5.15    0.62
   5  11  -3    6.80    0.61
  -6 -11   3   15.04    0.93
  -6 -11   3   14.05    0.83
   6  11  -3   16.76    0.89
  -7 -11   3    1.74    0.50
  -7 -11   3    1.61    0.43
   7  11  -3    1.83    0.42
  -8 -11   3    0.70    0.41
  -8 -11   3    0.61    0.36
   8  11  -3    1.11    0.40
  -9 -11   3   16.57    1.11
  -9 -11   3   17.94    1.03
   9  11  -3   18.52    1.06
 -10 -11   3    2.54    0.61
 -10 -11   3    2.16    0.55
  10  11  -3    2.80    0.56
 -11 -11   3    7.84    0.90
 -11 -11   3    6.25    0.89
  11  11  -3    7.50    0.86
 -12 -11   3    2.54    0.67
 -12 -11   3    2.17    0.56
  12  11  -3    1.87    0.56
  12 -10   3    0.30    0.41
  12 -10   3    0.44    0.47
 -12  10  -3    0.16    0.34
  11 -10   3    0.12    0.36
  11 -10   3    0.22    0.33
 -11  10  -3    0.23    0.33
  10 -10   3    8.71    0.91
  10 -10   3    8.07    0.75
 -10  10  -3    8.22    0.74
 -10  10  -3    7.36    0.68
   9 -10   3    2.89    0.46
   9 -10   3    1.85    0.45
  -9  10  -3    2.44    0.43
   8 -10   3    2.76    0.42
   8 -10   3    2.79    0.49
  -8  10  -3    2.74    0.43
   7 -10   3    3.40    0.51
   7 -10   3    2.69    0.39
  -7  10  -3    3.35    0.44
  -7  10  -3    3.09    0.49
   6 -10   3   41.76    1.48
   6 -10   3   38.86    1.26
  -6  10  -3   39.09    1.41
  -6  10  -3   41.36    1.31
   5 -10   3   -0.18    0.19
   5 -10   3    0.59    0.29
  -5  10  -3    0.54    0.24
  -5  10  -3    0.55    0.27
   4 -10   3    7.47    0.54
   4 -10   3    6.95    0.47
  -4  10  -3    7.22    0.52
  -4  10  -3    7.30    0.50
   3 -10   3    0.38    0.20
   3 -10   3   -0.08    0.14
  -3  10  -3    0.07    0.16
  -3  10  -3   -0.07    0.17
   2 -10   3    7.89    0.54
   2 -10   3    7.02    0.44
  -2  10  -3    5.95    0.44
  -2  10  -3    7.73    0.57
   1 -10   3   14.20    0.61
   1 -10   3   13.67    0.70
  -1  10  -3   14.67    0.65
  -1  10  -3   15.14    0.74
   0 -10   3    9.59    0.59
   0 -10   3   10.62    0.51
   0  10  -3   10.82    0.54
   0  10  -3   11.49    0.59
   0  10  -3   11.30    0.57
  -1 -10   3    0.60    0.18
  -1 -10   3    0.31    0.22
   1  10  -3    0.30    0.17
   1  10  -3    0.39    0.19
   1  10  -3    0.97    0.24
  -2 -10   3    4.96    0.51
  -2 -10   3    5.00    0.37
   2  10  -3    5.59    0.35
   2  10  -3    5.75    0.43
  -3 -10   3    0.56    0.22
  -3 -10   3   -0.20    0.21
   3  10  -3    0.22    0.12
   3  10  -3    0.20    0.22
  -4 -10   3    1.76    0.36
  -4 -10   3    1.25    0.29
   4  10  -3    1.99    0.34
  -5 -10   3   36.34    1.23
  -5 -10   3   36.59    1.39
   5  10  -3   37.26    1.27
  -6 -10   3   23.05    0.98
  -6 -10   3   21.47    1.08
   6  10  -3   21.33    0.96
  -7 -10   3    0.44    0.28
  -7 -10   3    0.97    0.38
   7  10  -3    0.63    0.35
  -8 -10   3    0.46    0.33
  -8 -10   3    0.95    0.40
   8  10  -3    0.87    0.36
  -9 -10   3    1.88    0.55
  -9 -10   3    2.88    0.54
   9  10  -3    1.49    0.47
 -10 -10   3    0.78    0.41
 -10 -10   3    0.55    0.48
  10  10  -3    1.33    0.47
 -11 -10   3    0.97    0.41
 -11 -10   3    0.34    0.40
  11  10  -3    0.87    0.44
 -12 -10   3   10.11    1.01
 -12 -10   3    8.67    1.09
  12  10  -3    9.90    1.02
  13  -9   3    0.75    0.45
  13  -9   3    1.35    0.61
  12  -9   3    3.33    0.60
  12  -9   3    3.37    0.66
 -12   9  -3    2.44    0.51
  11  -9   3    0.99    0.40
  11  -9   3   -0.33    0.26
 -11   9  -3    0.28    0.31
 -11   9  -3   -0.25    0.28
  10  -9   3   12.26    0.89
  10  -9   3   11.16    0.79
 -10   9  -3   10.39    0.73
 -10   9  -3   10.85    0.74
   9  -9   3    0.09    0.25
   9  -9   3    0.59    0.31
  -9   9  -3    0.07    0.21
  -9   9  -3   -0.02    0.25
   8  -9   3    5.40    0.65
   8  -9   3    5.06    0.53
  -8   9  -3    5.34    0.66
  -8   9  -3    5.84    0.57
  -8   9  -3    5.20    0.54
   7  -9   3   13.95    0.82
   7  -9   3   13.76    0.71
  -7   9  -3   14.08    0.74
  -7   9  -3   11.99    0.80
   6  -9   3   29.95    1.05
   6  -9   3   31.08    1.19
  -6   9  -3   30.91    1.20
  -6   9  -3   29.79    1.07
   5  -9   3    4.92    0.52
   5  -9   3    4.83    0.44
  -5   9  -3    5.26    0.52
  -5   9  -3    4.36    0.44
   4  -9   3   17.66    0.70
   4  -9   3   17.74    0.80
  -4   9  -3   18.42    0.79
  -4   9  -3   17.94    0.74
   3  -9   3    4.53    0.34
   3  -9   3    4.07    0.44
  -3   9  -3    4.20    0.39
  -3   9  -3    4.99    0.38
   2  -9   3   36.34    1.03
   2  -9   3   35.35    1.17
  -2   9  -3   35.19    1.10
  -2   9  -3   38.42    1.13
   1  -9   3    8.06    0.41
   1  -9   3    7.48    0.51
  -1   9  -3    7.54    0.50
  -1   9  -3    7.00    0.43
   0  -9   3   12.03    0.63
   0  -9   3   12.72    0.53
   0   9  -3   11.28    0.57
   0   9  -3   13.54    0.56
   0   9  -3   12.06    0.58
  -1  -9   3   94.76    2.37
  -1  -9   3   88.50    2.08
   1   9  -3   94.30    2.16
   1   9  -3   93.33    2.18
   1   9  -3   90.76    2.22
  -2  -9   3   20.24    0.87
  -2  -9   3   21.84    0.75
   2   9  -3   21.95    0.80
   2   9  -3   21.48    0.68
  -3  -9   3   81.65    2.22
  -3  -9   3   82.96    1.99
   3   9  -3   82.44    1.83
   3   9  -3   83.58    2.05
  -4  -9   3    0.06    0.17
  -4  -9   3    0.28    0.24
   4   9  -3    0.17    0.19
  -5  -9   3   64.45    1.95
  -5  -9   3   64.70    1.76
   5   9  -3   63.14    1.77
  -6  -9   3   -0.09    0.23
  -6  -9   3   -0.05    0.24
   6   9  -3    0.06    0.20
  -7  -9   3    0.91    0.36
  -7  -9   3    1.13    0.32
   7   9  -3    1.20    0.37
  -8  -9   3    0.61    0.32
  -8  -9   3   -0.11    0.30
   8   9  -3    0.52    0.33
  -9  -9   3    0.04    0.33
  -9  -9   3    0.27    0.34
   9   9  -3    0.31    0.31
 -10  -9   3    0.49    0.39
 -10  -9   3   -0.38    0.25
  10   9  -3   -0.12    0.35
 -11  -9   3    0.04    0.38
 -11  -9   3    0.31    0.36
  11   9  -3    0.14    0.34
 -12  -9   3    2.05    0.53
 -12  -9   3    1.56    0.58
  12   9  -3    1.61    0.50
 -13  -9   3    1.39    0.51
 -13  -9   3    0.44    0.50
  13   9  -3    1.63    0.59
  13  -8   3    1.72    0.50
 -13   8  -3    1.46    0.45
  12  -8   3    8.15    0.91
  12  -8   3    6.90    0.76
 -12   8  -3    8.98    0.82
 -12   8  -3    8.76    0.79
  11  -8   3    4.70    0.69
  11  -8   3    3.61    0.55
 -11   8  -3    2.92    0.50
 -11   8  -3    3.61    0.52
  10  -8   3    0.08    0.33
  10  -8   3    0.24    0.29
 -10   8  -3    0.57    0.30
 -10   8  -3    0.32    0.30
   9  -8   3   -0.07    0.26
   9  -8   3    0.02    0.27
  -9   8  -3   -0.06    0.23
  -9   8  -3    0.03    0.27
   8  -8   3    1.01    0.33
   8  -8   3    0.32    0.32
  -8   8  -3    0.65    0.28
  -8   8  -3    1.11    0.37
  -8   8  -3    1.32    0.35
   7  -8   3    3.59    0.48
   7  -8   3    4.64    0.48
  -7   8  -3    3.96    0.46
  -7   8  -3    3.90    0.54
  -7   8  -3    4.09    0.45
   6  -8   3    1.52    0.32
   6  -8   3    1.58    0.31
  -6   8  -3    1.77    0.30
  -6   8  -3    1.38    0.29
  -6   8  -3    2.18    0.37
   5  -8   3   15.09    0.75
   5  -8   3   16.37    0.67
  -5   8  -3   16.07    0.69
  -5   8  -3   15.30    0.75
   4  -8   3   13.07    0.65
   4  -8   3   12.65    0.56
  -4   8  -3   13.11    0.60
  -4   8  -3   12.04    0.61
   3  -8   3    0.08    0.15
   3  -8   3    0.16    0.16
  -3   8  -3    0.24    0.15
  -3   8  -3    0.09    0.16
   2  -8   3   54.91    1.55
   2  -8   3   57.22    1.41
  -2   8  -3   59.66    1.51
  -2   8  -3   57.09    1.48
   1  -8   3    9.14    0.42
   1  -8   3    9.00    0.51
  -1   8  -3    8.33    0.45
   0  -8   3   18.15    0.63
   0  -8   3   18.85    0.76
   0   8  -3   19.30    0.70
   0   8  -3   18.43    0.66
   0   8  -3   17.81    0.68
  -1  -8   3    1.69    0.28
  -1  -8   3    2.01    0.25
   1   8  -3    2.12    0.25
   1   8  -3    2.40    0.30
   1   8  -3    2.28    0.28
  -2  -8   3    8.03    0.51
  -2  -8   3    8.84    0.43
   2   8  -3    8.79    0.47
   2   8  -3    8.72    0.37
  -3  -8   3   14.17    0.72
  -3  -8   3   14.93    0.60
   3   8  -3   14.68    0.65
   3   8  -3   14.76    0.44
  -4  -8   3  181.27    3.87
  -4  -8   3  181.46    4.16
   4   8  -3  185.34    3.94
  -5  -8   3    4.29    0.50
  -5  -8   3    4.60    0.45
   5   8  -3    3.92    0.43
  -6  -8   3   34.46    1.30
  -6  -8   3   32.47    1.15
   6   8  -3   34.00    1.20
  -7  -8   3   15.58    0.90
  -7  -8   3   14.85    0.78
   7   8  -3   15.99    0.83
  -8  -8   3    4.86    0.63
  -8  -8   3    5.62    0.60
  -8  -8   3    5.02    0.36
   8   8  -3    4.20    0.54
  -9  -8   3    0.08    0.32
  -9  -8   3    0.26    0.30
   9   8  -3    0.56    0.35
 -10  -8   3   25.21    1.31
 -10  -8   3   26.29    1.23
  10   8  -3   24.55    1.19
 -11  -8   3    1.81    0.53
 -11  -8   3    2.36    0.51
  11   8  -3    2.07    0.54
 -12  -8   3    2.70    0.64
 -12  -8   3    1.75    0.56
  12   8  -3    2.85    0.64
 -13  -8   3    1.09    0.58
 -13  -8   3    0.40    0.42
  13   8  -3    0.30    0.39
  13  -7   3    1.08    0.51
 -13   7  -3    1.66    0.44
 -13   7  -3    1.14    0.44
  12  -7   3    1.26    0.47
  12  -7   3    0.75    0.41
 -12   7  -3    0.29    0.33
 -12   7  -3    0.68    0.38
  11  -7   3   27.01    1.35
  11  -7   3   27.08    1.23
 -11   7  -3   26.07    1.17
 -11   7  -3   24.99    1.12
  10  -7   3   -0.08    0.24
  10  -7   3   -0.48    0.26
 -10   7  -3   -0.35    0.23
 -10   7  -3   -0.34    0.25
   9  -7   3    2.80    0.52
   9  -7   3    3.24    0.49
  -9   7  -3    2.98    0.54
  -9   7  -3    2.62    0.42
  -9   7  -3    2.76    0.44
   8  -7   3   11.12    0.69
   8  -7   3   10.49    0.74
  -8   7  -3    9.90    0.63
  -8   7  -3    9.88    0.64
  -8   7  -3   10.30    0.76
   7  -7   3    6.48    0.61
   7  -7   3    6.92    0.53
  -7   7  -3    6.75    0.50
  -7   7  -3    7.28    0.67
  -7   7  -3    6.92    0.50
   6  -7   3    0.29    0.21
   6  -7   3    0.00    0.20
  -6   7  -3    0.19    0.20
  -6   7  -3    0.34    0.20
  -6   7  -3    0.11    0.19
   5  -7   3    4.14    0.43
   5  -7   3    4.54    0.41
  -5   7  -3    3.99    0.43
  -5   7  -3    3.87    0.38
  -5   7  -3    3.94    0.38
   4  -7   3    9.01    0.45
   4  -7   3   10.06    0.54
  -4   7  -3    9.93    0.50
  -4   7  -3    9.86    0.54
   3  -7   3   28.23    0.82
   3  -7   3   26.57    0.91
  -3   7  -3   26.53    0.85
  -3   7  -3   25.81    0.87
   2  -7   3   68.59    1.71
   2  -7   3   67.29    1.55
  -2   7  -3   66.43    1.62
  -2   7  -3   63.49    1.63
   1  -7   3    1.48    0.21
   1  -7   3    2.15    0.29
  -1   7  -3    1.63    0.25
  -1   7  -3    1.64    0.25
   0  -7   3    0.70    0.17
   0  -7   3    0.78    0.23
   0   7  -3    0.57    0.17
   0   7  -3    0.77    0.18
  -1  -7   3   22.49    0.82
  -1  -7   3   23.00    0.71
   1   7  -3   23.19    0.70
   1   7  -3   23.14    0.75
  -2  -7   3   18.80    0.63
  -2  -7   3   17.96    0.76
   2   7  -3   17.94    0.53
   2   7  -3   18.07    0.66
  -3  -7   3   10.07    0.56
  -3  -7   3   10.05    0.47
   3   7  -3   10.88    0.52
  -4  -7   3   34.33    1.03
  -4  -7   3   34.72    1.17
   4   7  -3   33.05    1.06
  -5  -7   3   76.36    1.85
  -5  -7   3   63.06    1.46
  -5  -7   3   76.06    2.03
   5   7  -3   75.98    1.90
  -6  -7   3    7.39    0.59
  -6  -7   3    8.56    0.54
   6   7  -3    8.15    0.58
  -7  -7   3   15.97    0.81
  -7  -7   3   15.85    0.89
   7   7  -3   13.91    0.79
  -8  -7   3    0.67    0.34
  -8  -7   3    0.59    0.18
  -8  -7   3    0.50    0.33
   8   7  -3    0.07    0.30
  -9  -7   3    1.99    0.45
  -9  -7   3    2.23    0.47
   9   7  -3    1.80    0.46
 -10  -7   3   24.16    1.17
 -10  -7   3   25.48    1.29
  10   7  -3   22.88    1.14
 -11  -7   3    1.18    0.44
 -11  -7   3    1.65    0.57
  11   7  -3    2.10    0.54
 -12  -7   3    8.02    0.98
 -12  -7   3    7.41    0.84
  12   7  -3    6.68    0.82
 -13  -7   3    6.85    0.93
 -13  -7   3    8.58    0.95
  13   7  -3    7.78    0.91
  13  -6   3    0.83    0.43
 -13   6  -3    1.16    0.42
 -13   6  -3    0.34    0.40
  12  -6   3    2.01    0.47
 -12   6  -3    3.21    0.54
 -12   6  -3    3.12    0.52
  11  -6   3    0.89    0.36
  11  -6   3    0.78    0.37
 -11   6  -3    0.33    0.31
 -11   6  -3    0.39    0.32
  10  -6   3    6.94    0.74
  10  -6   3    6.52    0.66
 -10   6  -3    8.15    0.70
 -10   6  -3    7.49    0.81
 -10   6  -3    6.10    0.62
   9  -6   3    7.39    0.65
   9  -6   3    6.35    0.67
  -9   6  -3    7.50    0.58
  -9   6  -3    7.14    0.63
  -9   6  -3    8.19    0.79
   8  -6   3    2.84    0.44
   8  -6   3    2.66    0.39
  -8   6  -3    2.40    0.48
  -8   6  -3    3.05    0.42
  -8   6  -3    2.93    0.39
   7  -6   3   17.76    0.86
   7  -6   3   19.35    0.82
  -7   6  -3   18.26    0.79
  -7   6  -3   19.60    0.94
  -7   6  -3   18.45    0.78
   6  -6   3    0.07    0.17
   6  -6   3   -0.16    0.14
  -6   6  -3   -0.11    0.21
  -6   6  -3   -0.28    0.15
  -6   6  -3    0.01    0.17
   5  -6   3   38.71    1.22
   5  -6   3   37.15    1.10
  -5   6  -3   37.49    1.10
  -5   6  -3   38.46    1.12
  -5   6  -3   37.70    1.22
   4  -6   3    3.04    0.34
   4  -6   3    2.67    0.28
  -4   6  -3    2.50    0.33
  -4   6  -3    3.54    0.33
  -4   6  -3    2.63    0.32
   3  -6   3    1.74    0.22
   3  -6   3    1.74    0.26
  -3   6  -3    1.82    0.25
  -3   6  -3    2.01    0.26
   2  -6   3  172.75    3.67
   2  -6   3  173.88    3.45
  -2   6  -3  169.16    3.61
  -2   6  -3  166.98    3.51
   1  -6   3   31.81    0.84
   1  -6   3   32.69    0.97
  -1   6  -3   32.72    0.91
  -1   6  -3   31.41    0.91
   0  -6   3   24.52    0.80
   0  -6   3   23.31    0.67
   0   6  -3   23.56    0.75
  -1  -6   3    1.12    0.21
  -1  -6   3    1.30    0.17
   1   6  -3    1.12    0.19
   1   6  -3    1.29    0.17
  -2  -6   3    2.49    0.31
  -2  -6   3    2.15    0.24
   2   6  -3    2.47    0.16
   2   6  -3    2.54    0.27
  -3  -6   3    6.89    0.37
  -3  -6   3    7.88    0.48
   3   6  -3    7.50    0.43
  -4  -6   3   78.02    2.00
  -4  -6   3   73.98    1.81
   4   6  -3   77.00    1.87
  -5  -6   3   35.77    1.22
  -5  -6   3   34.72    1.09
  -5  -6   3   37.21    0.82
   5   6  -3   33.67    1.11
  -6  -6   3    0.14    0.19
  -6  -6   3    0.46    0.28
   6   6  -3    0.24    0.21
  -7  -6   3   16.58    0.79
  -7  -6   3   16.55    0.88
  -7  -6   3   17.20    0.58
   7   6  -3   17.31    0.82
  -8  -6   3    7.56    0.60
  -8  -6   3    7.72    0.74
  -8  -6   3    8.81    0.39
   8   6  -3    8.79    0.64
  -9  -6   3    5.26    0.70
  -9  -6   3    6.43    0.66
   9   6  -3    5.12    0.59
 -10  -6   3   -0.40    0.24
 -10  -6   3    0.12    0.33
  10   6  -3    0.05    0.29
 -11  -6   3    6.72    0.76
 -11  -6   3    7.18    0.87
  11   6  -3    6.03    0.72
 -12  -6   3   -0.56    0.31
 -12  -6   3   -0.09    0.32
  12   6  -3   -0.01    0.40
 -13  -6   3    1.26    0.49
  13   6  -3    1.21    0.45
 -14  -6   3    0.81    0.51
  14   6  -3    1.33    0.59
  14  -5   3    7.10    0.89
 -14   5  -3    8.41    0.89
  13  -5   3    0.28    0.39
 -13   5  -3   -0.03    0.34
 -13   5  -3    0.22    0.37
  12  -5   3    0.70    0.41
 -12   5  -3    1.42    0.44
 -12   5  -3   -0.08    0.31
  11  -5   3    8.23    0.75
 -11   5  -3    8.95    0.70
 -11   5  -3   11.14    0.75
  10  -5   3   -0.10    0.25
  10  -5   3   -0.17    0.23
 -10   5  -3   -0.60    0.31
 -10   5  -3    0.41    0.25
 -10   5  -3    0.36    0.28
   9  -5   3   -0.09    0.29
   9  -5   3    0.37    0.26
  -9   5  -3   -0.16    0.22
  -9   5  -3    0.17    0.33
  -9   5  -3    0.20    0.26
   8  -5   3   35.28    1.20
   8  -5   3   34.43    1.31
  -8   5  -3   35.94    1.35
  -8   5  -3   32.48    1.16
  -8   5  -3   35.60    1.18
   7  -5   3    3.61    0.44
   7  -5   3    4.15    0.44
  -7   5  -3    3.87    0.48
  -7   5  -3    4.08    0.41
  -7   5  -3    4.33    0.44
   6  -5   3    5.82    0.47
   6  -5   3    7.18    0.45
  -6   5  -3    6.37    0.43
  -6   5  -3    6.44    0.42
  -6   5  -3    6.32    0.50
   5  -5   3   64.18    1.73
   5  -5   3   63.47    1.59
  -5   5  -3   64.55    1.76
  -5   5  -3   65.01    1.59
  -5   5  -3   63.13    1.59
   4  -5   3   24.43    0.84
   4  -5   3   22.50    0.74
  -4   5  -3   24.38    0.77
  -4   5  -3   24.16    0.77
  -4   5  -3   23.93    0.85
   3  -5   3    8.52    0.38
   3  -5   3    8.46    0.44
  -3   5  -3    9.18    0.41
  -3   5  -3    8.50    0.45
  -3   5  -3    8.53    0.41
   2  -5   3   74.46    1.79
   2  -5   3   76.76    1.66
  -2   5  -3   78.08    1.77
  -2   5  -3   76.07    1.72
   1  -5   3   33.45    0.84
   1  -5   3   33.64    0.93
   1  -5   3   33.55    0.94
  -1   5  -3   33.33    0.90
  -1   5  -3   33.55    0.91
   0  -5   3    8.16    0.39
   0  -5   3    7.30    0.31
   0   5  -3    7.78    0.37
   0   5  -3    7.36    0.35
  -1  -5   3    8.10    0.33
  -1  -5   3    8.42    0.42
   1   5  -3    8.76    0.38
   1   5  -3    9.28    0.32
  -2  -5   3  161.65    3.49
  -2  -5   3  161.01    3.25
   2   5  -3  165.22    3.25
   2   5  -3  159.23    3.30
  -3  -5   3   67.06    1.59
  -3  -5   3   70.86    1.76
   3   5  -3   69.20    1.64
  -4  -5   3   11.59    0.51
  -4  -5   3   11.38    0.58
  -4  -5   3   11.99    0.31
   4   5  -3   11.37    0.53
  -5  -5   3    4.25    0.43
  -5  -5   3    3.35    0.34
   5   5  -3    4.14    0.41
  -6  -5   3   22.06    0.95
  -6  -5   3   22.40    0.84
   6   5  -3   19.90    0.83
  -7  -5   3   -0.01    0.21
  -7  -5   3    0.50    0.27
  -7  -5   3    0.39    0.14
   7   5  -3    0.13    0.21
  -8  -5   3    4.96    0.60
  -8  -5   3    4.66    0.51
   8   5  -3    4.84    0.56
  -9  -5   3    1.22    0.35
  -9  -5   3    0.67    0.36
   9   5  -3    0.76    0.38
 -10  -5   3    1.78    0.48
 -10  -5   3    2.06    0.54
  10   5  -3    1.96    0.43
 -11  -5   3   22.99    1.25
 -11  -5   3   19.78    1.06
  11   5  -3   21.23    1.16
 -12  -5   3    0.70    0.51
 -12  -5   3    0.71    0.40
  12   5  -3    0.30    0.34
 -13  -5   3    0.18    0.43
  13   5  -3    0.49    0.43
 -14  -5   3    1.18    0.53
  14   5  -3    2.35    0.65
  14  -4   3    0.10    0.39
 -14   4  -3    0.01    0.37
 -14   4  -3    0.00    0.37
  13  -4   3    2.66    0.57
 -13   4  -3    1.36    0.45
 -13   4  -3    1.63    0.46
  12  -4   3   13.59    0.89
 -12   4  -3   14.02    0.89
 -12   4  -3   11.94    0.83
  11  -4   3    3.16    0.52
 -11   4  -3    3.00    0.57
 -11   4  -3    4.73    0.58
 -11   4  -3    3.30    0.48
  10  -4   3    3.79    0.51
 -10   4  -3    4.46    0.63
 -10   4  -3    4.35    0.53
 -10   4  -3    4.32    0.54
   9  -4   3    4.69    0.57
   9  -4   3    3.62    0.47
  -9   4  -3    4.51    0.62
  -9   4  -3    4.05    0.47
  -9   4  -3    4.20    0.50
   8  -4   3   13.92    0.78
   8  -4   3   12.60    0.70
  -8   4  -3   13.63    0.83
  -8   4  -3   13.15    0.68
  -8   4  -3   11.57    0.66
   7  -4   3   20.76    0.83
   7  -4   3   19.27    0.86
  -7   4  -3   21.14    0.82
  -7   4  -3   20.58    0.81
  -7   4  -3   20.77    0.96
   6  -4   3    6.66    0.47
   6  -4   3    6.54    0.43
  -6   4  -3    5.79    0.39
  -6   4  -3    6.76    0.43
  -6   4  -3    6.72    0.51
   5  -4   3    8.66    0.45
   5  -4   3    9.13    0.50
  -5   4  -3    9.34    0.47
  -5   4  -3    9.32    0.47
  -5   4  -3    9.89    0.55
   4  -4   3   18.28    0.69
   4  -4   3   17.63    0.61
  -4   4  -3   16.37    0.61
  -4   4  -3   18.21    0.62
  -4   4  -3   18.49    0.72
   3  -4   3    2.98    0.29
   3  -4   3    3.03    0.23
  -3   4  -3    3.24    0.25
  -3   4  -3    3.23    0.25
  -3   4  -3    3.74    0.30
   2  -4   3  110.64    2.42
   2  -4   3  110.65    2.27
  -2   4  -3  109.73    2.30
  -2   4  -3  112.22    2.33
  -2   4  -3  111.52    2.40
   1  -4   3   11.60    0.38
   1  -4   3   11.48    0.43
   1  -4   3   11.35    0.44
  -1   4  -3   11.53    0.42
  -1   4  -3   11.87    0.43
   0  -4   3  364.87    6.95
   0  -4   3  372.93    7.32
   0   4  -3  369.01    7.27
   0   4  -3  366.07    7.06
  -1  -4   3  459.93    9.25
  -1  -4   3  469.38    8.82
   1   4  -3  478.86    8.88
  -2  -4   3   11.83    0.41
  -2  -4   3   11.20    0.47
   2   4  -3   11.41    0.43
  -3  -4   3   93.66    2.18
  -3  -4   3   92.31    2.01
   3   4  -3   93.81    2.06
  -4  -4   3  204.79    4.20
  -4  -4   3  208.96    4.46
   4   4  -3  209.72    4.25
  -5  -4   3  118.91    2.82
  -5  -4   3  117.09    2.61
   5   4  -3  116.86    2.65
  -6  -4   3    2.90    0.39
  -6  -4   3    3.17    0.22
  -6  -4   3    2.84    0.35
   6   4  -3    3.19    0.39
  -7  -4   3   20.14    0.93
  -7  -4   3   21.08    0.85
  -7  -4   3   20.68    0.60
   7   4  -3   19.54    0.86
  -8  -4   3   -0.03    0.22
  -8  -4   3    0.08    0.21
   8   4  -3   -0.18    0.24
  -9  -4   3    7.68    0.76
  -9  -4   3    7.83    0.70
   9   4  -3    9.09    0.67
 -10  -4   3   17.98    1.09
 -10  -4   3   19.16    1.00
  10   4  -3   19.92    1.03
 -11  -4   3    0.14    0.33
 -11  -4   3    0.25    0.34
  11   4  -3    0.33    0.33
 -12  -4   3    3.69    0.60
 -12  -4   3    4.15    0.68
  12   4  -3    3.76    0.60
 -13  -4   3    9.65    0.93
  13   4  -3    7.88    0.90
 -14  -4   3    0.87    0.48
  14   4  -3    1.24    0.51
  14  -3   3    0.88    0.50
 -14   3  -3    1.53    0.49
 -14   3  -3    1.22    0.51
  13  -3   3    4.71    0.66
 -13   3  -3    4.90    0.68
 -13   3  -3    5.52    0.71
  12  -3   3    1.12    0.39
 -12   3  -3    0.35    0.36
 -12   3  -3    0.32    0.35
  11  -3   3    9.89    0.73
 -11   3  -3    8.85    0.79
 -11   3  -3    9.11    0.91
 -11   3  -3    8.90    0.67
  10  -3   3    4.52    0.55
 -10   3  -3    6.41    0.74
 -10   3  -3    5.09    0.59
 -10   3  -3    5.10    0.56
   9  -3   3   23.21    0.98
  -9   3  -3   20.89    1.09
  -9   3  -3   21.73    0.92
  -9   3  -3   21.07    0.94
   8  -3   3    4.69    0.48
   8  -3   3    4.65    0.53
  -8   3  -3    4.44    0.55
  -8   3  -3    4.51    0.47
  -8   3  -3    4.42    0.47
   7  -3   3    0.32    0.24
   7  -3   3    0.18    0.18
  -7   3  -3   -0.01    0.19
  -7   3  -3   -0.12    0.15
  -7   3  -3    0.03    0.19
   6  -3   3    2.43    0.30
   6  -3   3    2.57    0.33
  -6   3  -3    2.09    0.27
  -6   3  -3    1.84    0.29
  -6   3  -3    2.26    0.35
   5  -3   3  132.62    2.95
   5  -3   3  126.68    2.77
  -5   3  -3  130.40    2.80
  -5   3  -3  128.84    3.00
  -5   3  -3  124.02    2.75
   4  -3   3   40.80    1.11
   4  -3   3   37.49    1.01
  -4   3  -3   39.47    1.04
  -4   3  -3   37.48    1.12
  -4   3  -3   38.43    1.01
   3  -3   3  147.18    3.13
   3  -3   3  146.27    2.96
  -3   3  -3  149.01    2.97
  -3   3  -3  146.66    3.15
  -3   3  -3  143.88    2.99
   2  -3   3    2.63    0.21
   2  -3   3    2.20    0.21
   2  -3   3    2.17    0.19
  -2   3  -3    2.32    0.18
  -2   3  -3    2.67    0.20
  -2   3  -3    2.57    0.20
   1  -3   3    0.59    0.13
   1  -3   3    0.48    0.12
   1  -3   3    0.65    0.11
   1  -3   3    0.54    0.12
  -1   3  -3    0.62    0.13
  -1   3  -3    0.60    0.13
   0  -3   3  121.54    2.33
   0  -3   3  118.02    2.38
   0  -3   3  118.79    2.48
   0   3  -3  117.51    2.39
   0   3  -3  115.46    2.44
   0   3  -3  117.45    2.48
  -1  -3   3    0.14    0.11
  -1  -3   3   -0.02    0.10
  -1  -3   3    0.12    0.09
   1   3  -3   -0.09    0.08
   1   3  -3   -0.07    0.12
  -2  -3   3   13.44    0.51
  -2  -3   3   14.35    0.45
   2   3  -3   13.70    0.46
  -3  -3   3   34.77    1.00
  -3  -3   3   35.97    0.92
   3   3  -3   36.79    0.95
  -4  -3   3    3.84    0.29
  -4  -3   3    2.91    0.35
   4   3  -3    3.61    0.34
  -5  -3   3    9.89    0.37
  -5  -3   3   10.20    0.56
  -5  -3   3   11.27    0.51
   5   3  -3    9.42    0.50
  -6  -3   3   17.31    0.52
  -6  -3   3   17.27    0.78
  -6  -3   3   17.38    0.70
   6   3  -3   16.29    0.71
  -7  -3   3    5.73    0.45
  -7  -3   3    6.73    0.54
   7   3  -3    6.35    0.48
  -8  -3   3   -0.09    0.20
  -8  -3   3    0.02    0.22
   8   3  -3    0.03    0.22
  -9  -3   3    6.98    0.70
  -9  -3   3    7.01    0.65
   9   3  -3    5.15    0.59
 -10  -3   3    1.74    0.49
 -10  -3   3    1.28    0.36
  10   3  -3    1.30    0.42
 -11  -3   3    0.71    0.38
 -11  -3   3   -0.37    0.34
  11   3  -3    0.76    0.41
 -12  -3   3    5.09    0.73
 -12  -3   3    4.95    0.64
  12   3  -3    5.20    0.71
 -13  -3   3    1.80    0.50
  13   3  -3    2.77    0.64
 -14  -3   3    0.09    0.43
  14   3  -3    1.50    0.49
  14  -2   3    3.61    0.68
 -14   2  -3    3.16    0.62
 -14   2  -3    3.55    0.64
  13  -2   3    3.62    0.60
 -13   2  -3    4.67    0.67
 -13   2  -3    4.93    0.65
  12  -2   3   -0.14    0.27
 -12   2  -3   -0.43    0.28
 -12   2  -3    0.19    0.35
 -12   2  -3   -0.07    0.32
  11  -2   3    0.54    0.36
 -11   2  -3    1.54    0.40
 -11   2  -3    0.66    0.39
 -11   2  -3    1.11    0.38
  10  -2   3    8.83    0.66
 -10   2  -3    9.37    0.65
 -10   2  -3    9.60    0.78
 -10   2  -3    9.93    0.70
   9  -2   3    2.84    0.45
  -9   2  -3    3.19    0.43
  -9   2  -3    3.61    0.53
  -9   2  -3    4.00    0.49
   8  -2   3    6.83    0.51
  -8   2  -3    6.10    0.55
  -8   2  -3    6.84    0.65
  -8   2  -3    6.86    0.53
   7  -2   3    1.14    0.29
   7  -2   3    1.63    0.30
  -7   2  -3    1.58    0.33
  -7   2  -3    1.37    0.28
  -7   2  -3    1.11    0.25
   6  -2   3    5.32    0.39
   6  -2   3    5.99    0.43
  -6   2  -3    5.49    0.38
  -6   2  -3    5.28    0.37
  -6   2  -3    4.83    0.48
   5  -2   3    2.25    0.30
   5  -2   3    1.97    0.28
  -5   2  -3    1.95    0.27
  -5   2  -3    2.08    0.31
  -5   2  -3    2.08    0.26
   4  -2   3   36.74    0.97
   4  -2   3   36.60    1.03
  -4   2  -3   37.18    0.96
  -4   2  -3   34.98    0.97
  -4   2  -3   35.72    1.07
   3  -2   3   21.46    0.61
   3  -2   3   20.97    0.65
  -3   2  -3   20.76    0.62
  -3   2  -3   20.74    0.60
  -3   2  -3   20.17    0.67
   2  -2   3    0.51    0.12
   2  -2   3    0.32    0.11
   2  -2   3    0.33    0.10
   2  -2   3    0.36    0.10
  -2   2  -3    0.43    0.12
  -2   2  -3    0.45    0.11
  -2   2  -3    0.39    0.12
  -2   2  -3    0.50    0.11
   1  -2   3   51.14    1.10
   1  -2   3   43.86    1.09
   1  -2   3   49.32    1.02
   1  -2   3   47.28    1.05
  -1   2  -3   45.46    1.08
  -1   2  -3   50.92    1.11
  -1   2  -3   49.32    1.06
  -1   2  -3   50.21    1.05
   0  -2   3   30.68    0.68
   0   2  -3   30.29    0.71
   0   2  -3   31.43    0.75
  -1  -2   3    7.15    0.24
  -1  -2   3    5.44    0.26
  -1  -2   3    5.03    0.26
   1   2  -3    6.65    0.28
   1   2  -3    6.94    0.27
  -2  -2   3   71.21    1.51
  -2  -2   3   72.66    1.46
  -2  -2   3   70.56    1.61
   2   2  -3   70.87    1.62
   2   2  -3   72.62    1.54
  -3  -2   3   57.33    1.40
  -3  -2   3   58.42    1.27
  -3  -2   3   56.44    1.29
   3   2  -3   53.68    1.30
  -4  -2   3    6.27    0.27
  -4  -2   3    6.17    0.39
  -4  -2   3    6.16    0.34
   4   2  -3    6.87    0.38
  -5  -2   3    5.19    0.46
  -5  -2   3    5.07    0.35
   5   2  -3    4.85    0.37
  -6  -2   3   71.56    1.79
  -6  -2   3   72.13    1.93
   6   2  -3   73.08    1.84
  -7  -2   3   60.31    1.78
  -7  -2   3   62.00    1.65
   7   2  -3   59.46    1.67
  -8  -2   3   23.43    0.95
  -8  -2   3   22.73    1.02
   8   2  -3   22.86    0.98
  -9  -2   3   53.70    1.80
  -9  -2   3   54.03    1.64
   9   2  -3   50.86    1.66
 -10  -2   3    3.98    0.64
 -10  -2   3    4.01    0.51
  10   2  -3    3.81    0.57
 -11  -2   3    1.99    0.50
 -11  -2   3    2.75    0.48
  11   2  -3    2.37    0.51
 -12  -2   3   17.35    0.99
 -12  -2   3   18.23    1.15
  12   2  -3   20.39    1.11
 -13  -2   3   -0.34    0.33
  13   2  -3   -0.26    0.30
 -14  -2   3    3.63    0.65
  14   2  -3    3.99    0.72
  14  -1   3    0.47    0.44
 -14   1  -3    0.32    0.42
 -14   1  -3    1.01    0.46
  13  -1   3   14.33    0.98
 -13   1  -3   16.65    1.04
 -13   1  -3   15.75    1.00
  12  -1   3   -0.07    0.35
 -12   1  -3   -0.11    0.44
 -12   1  -3   -0.33    0.29
 -12   1  -3   -0.19    0.25
  11  -1   3   11.61    0.82
 -11   1  -3   10.22    0.97
 -11   1  -3   10.94    0.78
 -11   1  -3   10.79    0.75
  10  -1   3    8.34    0.73
 -10   1  -3   10.64    0.82
 -10   1  -3   10.01    0.68
   9  -1   3    1.17    0.33
  -9   1  -3    2.29    0.47
  -9   1  -3    1.38    0.32
   8  -1   3   22.31    0.92
  -8   1  -3   22.88    0.93
  -8   1  -3   22.84    1.04
   7  -1   3    8.17    0.51
  -7   1  -3    8.63    0.60
  -7   1  -3    8.88    0.51
   6  -1   3   -0.11    0.14
  -6   1  -3    0.18    0.23
  -6   1  -3    0.25    0.17
   5  -1   3   61.79    1.54
   5  -1   3   62.91    1.63
  -5   1  -3   64.71    1.71
  -5   1  -3   62.95    1.54
   4  -1   3    0.14    0.13
   4  -1   3   -0.16    0.09
  -4   1  -3    0.00    0.13
  -4   1  -3   -0.11    0.13
   3  -1   3  186.50    3.62
   3  -1   3  183.18    3.77
  -3   1  -3  183.54    3.62
  -3   1  -3  178.90    3.81
   2  -1   3    0.26    0.13
   2  -1   3   -0.07    0.09
   2  -1   3    0.26    0.13
  -2   1  -3    0.00    0.12
  -2   1  -3    0.15    0.11
  -2   1  -3    0.17    0.10
   1  -1   3    6.90    0.24
   1  -1   3    6.34    0.21
  -1   1  -3    6.08    0.22
  -1   1  -3    6.53    0.22
  -1   1  -3    6.15    0.23
  -1  -1   3    8.36    0.24
  -1  -1   3    8.24    0.25
  -1  -1   3    6.85    0.20
   1   1  -3    6.37    0.24
   1   1  -3    8.37    0.25
  -2  -1   3   82.95    1.82
  -2  -1   3   85.86    1.83
  -2  -1   3   85.72    1.73
  -2  -1   3   86.00    1.77
   2   1  -3   82.84    1.74
   2   1  -3   85.76    1.84
  -3  -1   3   70.52    1.58
  -3  -1   3   72.92    1.61
  -3  -1   3   74.00    1.70
   3   1  -3   72.31    1.61
   3   1  -3   71.45    1.70
   3   1  -3   79.17    1.59
  -4  -1   3    0.25    0.14
  -4  -1   3    0.20    0.12
   4   1  -3   -0.11    0.13
   4   1  -3    0.06    0.07
  -5  -1   3   33.01    0.97
  -5  -1   3   34.91    1.09
   5   1  -3   34.84    1.01
  -6  -1   3   27.91    0.99
  -6  -1   3   28.00    0.90
   6   1  -3   25.45    0.90
  -7  -1   3   -0.01    0.16
  -7  -1   3   -0.10    0.19
   7   1  -3   -0.12    0.20
  -8  -1   3    0.09    0.23
  -8  -1   3    0.02    0.18
   8   1  -3    0.42    0.24
  -9  -1   3    3.59    0.45
  -9  -1   3    3.24    0.49
   9   1  -3    3.83    0.52
 -10  -1   3    1.07    0.38
 -10  -1   3    1.37    0.37
  10   1  -3    1.00    0.39
 -11  -1   3    1.29    0.45
 -11  -1   3    1.17    0.34
  11   1  -3    1.37    0.41
 -12  -1   3    1.77    0.43
  12   1  -3    1.44    0.48
 -13  -1   3   -0.11    0.33
  13   1  -3   -0.25    0.35
 -14  -1   3    1.62    0.50
 -14  -1   3    2.72    0.60
 -14  -1   3    2.89    0.57
  14   1  -3    3.00    0.62
  14   0   3    0.41    0.46
 -14   0  -3    0.71    0.43
 -14   0  -3   -0.39    0.36
  13   0   3    2.50    0.53
 -13   0  -3    3.05    0.56
 -13   0  -3    4.02    0.62
  12   0   3   -0.22    0.27
 -12   0  -3   -0.09    0.35
 -12   0  -3   -0.12    0.33
  11   0   3   23.93    1.14
 -11   0  -3   21.84    1.24
 -11   0  -3   24.02    1.12
  10   0   3    0.15    0.30
 -10   0  -3    0.23    0.30
 -10   0  -3    0.09    0.29
   9   0   3    1.98    0.41
  -9   0  -3    2.72    0.50
  -9   0  -3    1.94    0.39
   8   0   3    0.13    0.23
  -8   0  -3   -0.33    0.16
  -8   0  -3   -0.03    0.24
   7   0   3   45.19    1.33
  -7   0  -3   44.36    1.47
  -7   0  -3   43.87    1.31
   6   0   3    0.03    0.16
  -6   0  -3    0.10    0.17
  -6   0  -3    0.00    0.16
   5   0   3  123.02    2.66
   5   0   3  121.81    2.49
  -5   0  -3  123.34    2.65
  -5   0  -3  122.14    2.86
   4   0   3    0.02    0.05
   4   0   3    0.06    0.12
  -4   0  -3   -0.18    0.12
  -4   0  -3   -0.09    0.11
   3   0   3   45.61    1.08
   3   0   3   47.42    1.00
   3   0   3   45.41    1.14
  -3   0  -3   48.03    1.10
  -3   0  -3   45.47    1.19
   2   0   3   -0.26    0.09
   2   0   3   -0.06    0.06
   2   0   3    0.19    0.11
   2   0   3   -0.16    0.08
  -2   0  -3   -0.03    0.10
  -2   0  -3    0.05    0.11
  -2   0  -3   -0.04    0.09
   0   0   3   -0.20    0.03
   0   0   3   -0.23    0.01
   0   0   3   -0.22    0.01
   0   0   3   -0.25    0.01
   0   0  -3   -0.25    0.01
   0   0  -3   -0.23    0.01
   0   0  -3   -0.23    0.02
   0   0  -3   -0.23    0.01
   0   0  -3   -0.23    0.01
  -2   0   3   -0.32    0.07
  -2   0   3   -0.24    0.11
  -2   0   3   -0.14    0.09
  -2   0   3   -0.30    0.09
   2   0  -3   -0.35    0.08
   2   0  -3   -0.22    0.09
   2   0  -3   -0.32    0.11
  -3   0   3  106.43    2.15
  -3   0   3  104.68    2.27
   3   0  -3  103.24    2.16
   3   0  -3  105.87    2.24
   3   0  -3  102.27    2.27
  -4   0   3    0.03    0.11
  -4   0   3   -0.19    0.12
   4   0  -3   -0.16    0.08
   4   0  -3   -0.18    0.13
  -5   0   3  509.90    9.55
  -5   0   3  486.60    9.98
   5   0  -3  486.13    9.58
   5   0  -3  511.72   10.08
  -6   0   3   -0.15    0.15
  -6   0   3    0.09    0.20
   6   0  -3   -0.09    0.17
   6   0  -3    0.03    0.09
  -7   0   3   15.93    0.76
  -7   0   3   15.35    0.68
   7   0  -3   15.88    0.47
   7   0  -3   14.63    0.70
  -8   0   3   -0.26    0.14
  -8   0   3    0.35    0.23
   8   0  -3    0.00    0.21
  -9   0   3   13.47    0.81
  -9   0   3   14.37    0.73
   9   0  -3   12.90    0.78
 -10   0   3    0.04    0.26
 -10   0   3   -0.21    0.25
  10   0  -3    0.51    0.34
 -11   0   3   24.77    1.10
 -11   0   3   26.37    1.29
  11   0  -3   24.08    1.15
 -12   0   3    0.14    0.27
  12   0  -3   -0.02    0.31
 -13   0   3    0.48    0.39
 -13   0   3   -0.05    0.34
  13   0  -3    0.01    0.33
 -14   0   3   -0.23    0.36
 -14   0   3   -0.65    0.31
 -14   0   3    0.05    0.39
  14   0  -3   -0.17    0.43
  14   1   3    0.51    0.39
 -14  -1  -3   -0.24    0.33
  13   1   3   17.33    1.04
 -13  -1  -3   13.73    1.25
 -13  -1  -3   14.11    0.95
  12   1   3    0.16    0.33
 -12  -1  -3    0.28    0.38
 -12  -1  -3    0.52    0.46
  11   1   3   11.46    0.79
 -11  -1  -3    7.99    0.90
 -11  -1  -3   11.28    0.81
  10   1   3    9.97    0.73
 -10  -1  -3    9.96    0.93
 -10  -1  -3    9.09    0.68
   9   1   3    1.48    0.36
  -9  -1  -3    1.44    0.40
  -9  -1  -3    1.96    0.38
   8   1   3   24.40    0.99
  -8  -1  -3   23.85    0.96
  -8  -1  -3   23.16    1.07
   7   1   3    8.85    0.56
  -7  -1  -3    9.52    0.64
  -7  -1  -3    9.32    0.56
   6   1   3   -0.17    0.16
  -6  -1  -3   -0.30    0.14
  -6  -1  -3    0.10    0.20
   5   1   3   65.98    1.60
  -5  -1  -3   66.29    1.75
  -5  -1  -3   63.65    1.59
   4   1   3   -0.02    0.11
  -4  -1  -3   -0.06    0.14
  -4  -1  -3   -0.04    0.12
   3   1   3  186.32    3.72
  -3  -1  -3  185.99    3.73
  -3  -1  -3  183.80    3.87
  -3  -1  -3  182.62    3.92
  -3  -1  -3  204.56    3.79
   2   1   3    0.11    0.12
  -2  -1  -3    0.10    0.12
  -2  -1  -3   -0.03    0.07
  -2  -1  -3    0.17    0.10
  -1   1   3    7.49    0.28
  -1   1   3    6.88    0.18
  -1   1   3    7.97    0.18
  -2   1   3   82.88    1.64
  -2   1   3   83.85    1.71
  -2   1   3   83.36    1.63
  -2   1   3   85.29    1.84
   2  -1  -3   83.52    1.66
   2  -1  -3   83.87    1.66
   2  -1  -3   73.69    1.70
   2  -1  -3   83.66    1.75
  -3   1   3   72.80    1.65
  -3   1   3   71.66    1.53
   3  -1  -3   72.63    1.57
   3  -1  -3   74.42    1.66
   3  -1  -3   72.89    1.62
  -4   1   3    0.28    0.11
  -4   1   3    0.03    0.14
   4  -1  -3    0.27    0.14
   4  -1  -3    0.30    0.14
   4  -1  -3    0.12    0.14
  -5   1   3   33.83    0.95
  -5   1   3   34.74    1.06
   5  -1  -3   34.57    1.00
  -6   1   3   29.12    1.00
  -6   1   3   27.98    0.88
   6  -1  -3   25.95    0.90
  -7   1   3    0.15    0.23
  -7   1   3    0.10    0.16
   7  -1  -3    0.17    0.19
  -8   1   3   -0.11    0.16
  -8   1   3   -0.17    0.21
   8  -1  -3    0.11    0.22
  -9   1   3    4.20    0.47
  -9   1   3    2.53    0.43
   9  -1  -3    3.20    0.45
 -10   1   3    1.46    0.44
 -10   1   3    0.47    0.28
  10  -1  -3    1.04    0.39
 -11   1   3    1.80    0.42
 -11   1   3    1.74    0.37
 -11   1   3    2.42    0.54
  11  -1  -3    1.79    0.45
 -12   1   3    1.05    0.38
 -12   1   3    2.00    0.41
  12  -1  -3    2.23    0.52
 -13   1   3    0.62    0.34
 -13   1   3    0.55    0.34
  13  -1  -3   -0.04    0.33
 -14   1   3    2.47    0.54
 -14   1   3    2.24    0.51
 -14   1   3    1.85    0.58
  14  -1  -3    2.54    0.63
  14   2   3    3.03    0.61
 -14  -2  -3    4.71    0.69
  13   2   3    4.41    0.68
 -13  -2  -3    4.77    0.67
 -13  -2  -3    3.24    0.70
  12   2   3   -0.58    0.24
 -12  -2  -3    0.44    0.40
 -12  -2  -3    0.69    0.38
  11   2   3    1.25    0.37
 -11  -2  -3    0.23    0.31
 -11  -2  -3    1.26    0.55
  10   2   3    9.96    0.71
 -10  -2  -3   10.17    0.71
 -10  -2  -3   10.41    0.83
   9   2   3    2.94    0.45
  -9  -2  -3    4.00    0.60
  -9  -2  -3    3.71    0.48
   8   2   3    6.96    0.53
  -8  -2  -3    6.54    0.59
  -8  -2  -3    5.73    0.63
   7   2   3    0.96    0.25
  -7  -2  -3    1.00    0.30
  -7  -2  -3    1.09    0.27
   6   2   3    5.03    0.39
  -6  -2  -3    5.56    0.41
  -6  -2  -3    5.92    0.48
   5   2   3    2.27    0.29
  -5  -2  -3    1.92    0.30
  -5  -2  -3    1.93    0.28
   4   2   3   35.55    0.97
  -4  -2  -3   34.33    0.96
  -4  -2  -3   35.83    0.77
  -4  -2  -3   38.03    1.10
   3   2   3   19.92    0.61
  -3  -2  -3   20.45    0.67
  -3  -2  -3   20.18    0.60
   2   2   3    0.35    0.11
  -2  -2  -3    0.35    0.13
  -2  -2  -3    0.21    0.10
   1   2   3   51.12    1.05
   1   2   3   51.95    1.10
   1   2   3   48.89    1.16
  -1  -2  -3   52.71    1.04
   0   2   3   32.04    0.74
   0  -2  -3   25.96    0.55
  -1   2   3    6.74    0.18
  -1   2   3    6.90    0.19
  -1   2   3    7.05    0.32
  -1   2   3    6.77    0.18
   1  -2  -3    6.71    0.20
  -2   2   3   75.57    1.71
  -2   2   3   72.95    1.46
  -2   2   3   72.84    1.45
   2  -2  -3   73.49    1.50
   2  -2  -3   71.92    1.47
   2  -2  -3   72.38    1.57
   2  -2  -3   72.48    1.55
  -3   2   3   55.23    1.20
  -3   2   3   56.06    1.21
   3  -2  -3   57.78    1.34
   3  -2  -3   56.05    1.30
   3  -2  -3   56.17    1.26
  -4   2   3    7.05    0.38
  -4   2   3    6.01    0.30
  -4   2   3    6.39    0.30
   4  -2  -3    6.42    0.34
   4  -2  -3    6.63    0.35
   4  -2  -3    5.87    0.37
  -5   2   3    4.47    0.31
  -5   2   3    5.29    0.32
  -5   2   3    4.85    0.36
   5  -2  -3    4.38    0.34
   5  -2  -3    4.42    0.35
  -6   2   3   70.25    1.69
  -6   2   3   70.05    1.85
  -6   2   3   71.09    1.70
   6  -2  -3   68.80    1.74
   6  -2  -3   71.70    1.83
  -7   2   3   61.54    1.60
  -7   2   3   61.96    1.77
  -7   2   3   60.21    1.58
   7  -2  -3   63.87    1.67
  -8   2   3   23.34    1.01
  -8   2   3   23.73    0.89
  -8   2   3   24.29    0.89
   8  -2  -3   23.00    0.94
  -9   2   3   52.73    1.55
  -9   2   3   54.07    1.76
  -9   2   3   53.08    1.56
   9  -2  -3   51.90    1.64
 -10   2   3    3.08    0.43
 -10   2   3    3.82    0.49
 -10   2   3    3.64    0.58
  10  -2  -3    3.53    0.53
 -11   2   3    1.06    0.31
 -11   2   3    2.35    0.43
  11  -2  -3    1.18    0.42
 -12   2   3   18.49    0.97
 -12   2   3   18.33    0.97
  12  -2  -3   19.79    1.10
 -13   2   3   -0.03    0.31
 -13   2   3   -0.32    0.29
  13  -2  -3   -0.20    0.28
 -14   2   3    3.14    0.70
 -14   2   3    3.53    0.62
 -14   2   3    3.79    0.59
  14  -2  -3    4.11    0.69
  14   3   3    0.53    0.43
 -14  -3  -3    1.17    0.52
  13   3   3    4.96    0.70
 -13  -3  -3    5.51    0.87
 -13  -3  -3    4.71    0.69
  12   3   3    1.38    0.46
 -12  -3  -3    0.46    0.34
 -12  -3  -3    0.22    0.40
  11   3   3    9.54    0.74
 -11  -3  -3    9.02    0.92
 -11  -3  -3    8.77    0.80
  10   3   3    4.97    0.62
 -10  -3  -3    4.78    0.57
 -10  -3  -3    6.05    0.75
   9   3   3   21.54    0.97
  -9  -3  -3   22.09    0.98
  -9  -3  -3   20.27    1.08
   8   3   3    4.52    0.51
  -8  -3  -3    4.10    0.47
  -8  -3  -3    3.79    0.52
   7   3   3    0.05    0.20
  -7  -3  -3   -0.11    0.22
  -7  -3  -3   -0.10    0.18
   6   3   3    2.03    0.30
  -6  -3  -3    2.31    0.37
  -6  -3  -3    2.35    0.32
   5   3   3  130.26    2.84
  -5  -3  -3  129.15    3.05
  -5  -3  -3  131.62    2.85
   4   3   3   38.79    1.04
  -4  -3  -3   38.61    1.04
  -4  -3  -3   38.52    1.15
   3   3   3  144.51    3.00
  -3  -3  -3  147.91    3.19
  -3  -3  -3  151.48    3.01
   2   3   3    2.60    0.19
  -2  -3  -3    2.69    0.19
  -2  -3  -3    2.04    0.21
   1   3   3    0.73    0.11
   1   3   3    0.77    0.14
  -1  -3  -3    0.67    0.12
  -1  -3  -3    0.57    0.09
  -1  -3  -3    0.60    0.11
   0   3   3  122.05    2.36
   0   3   3  120.80    2.34
   0   3   3  120.29    2.56
   0  -3  -3  119.86    2.28
   0  -3  -3  121.70    2.26
   0  -3  -3  108.65    2.37
   0  -3  -3  120.42    2.37
  -1   3   3   -0.06    0.11
  -1   3   3   -0.05    0.06
  -1   3   3    0.03    0.07
   1  -3  -3    0.08    0.07
   1  -3  -3    0.02    0.06
   1  -3  -3    0.01    0.06
   1  -3  -3   -0.05    0.07
  -2   3   3   13.14    0.33
  -2   3   3   12.70    0.51
  -2   3   3   10.98    0.38
   2  -3  -3   13.25    0.42
   2  -3  -3   13.56    0.37
   2  -3  -3   13.01    0.38
   2  -3  -3   13.45    0.40
  -3   3   3   36.57    0.84
  -3   3   3   35.91    0.83
   3  -3  -3   35.80    0.88
   3  -3  -3   35.50    0.92
   3  -3  -3   36.33    0.95
  -4   3   3    3.62    0.29
  -4   3   3    3.53    0.23
  -4   3   3    3.08    0.22
   4  -3  -3    3.01    0.28
   4  -3  -3    3.93    0.31
   4  -3  -3    3.27    0.28
  -5   3   3   10.04    0.43
  -5   3   3    9.90    0.50
  -5   3   3    9.62    0.42
   5  -3  -3   10.21    0.49
   5  -3  -3   11.41    0.50
  -6   3   3   15.92    0.72
  -6   3   3   17.28    0.63
  -6   3   3   17.32    0.62
   6  -3  -3   15.97    0.69
   6  -3  -3   17.15    0.67
  -7   3   3    6.57    0.42
  -7   3   3    6.11    0.40
  -7   3   3    6.26    0.48
   7  -3  -3    6.68    0.49
   7  -3  -3    6.41    0.45
  -8   3   3    0.09    0.16
  -8   3   3    0.18    0.22
  -8   3   3   -0.07    0.17
   8  -3  -3   -0.06    0.22
  -9   3   3    5.16    0.61
  -9   3   3    5.28    0.50
  -9   3   3    4.92    0.50
   9  -3  -3    6.11    0.59
 -10   3   3    1.04    0.32
 -10   3   3    1.89    0.36
 -10   3   3    1.27    0.41
  10  -3  -3    1.69    0.39
 -11   3   3    1.48    0.35
 -11   3   3    0.43    0.30
  11  -3  -3    0.40    0.35
 -12   3   3    4.97    0.59
 -12   3   3    5.19    0.59
  12  -3  -3    5.44    0.67
 -13   3   3    1.78    0.44
 -13   3   3    1.70    0.42
  13  -3  -3    1.70    0.53
 -14   3   3   -0.04    0.45
 -14   3   3    0.55    0.40
  14  -3  -3    0.90    0.48
  14   4   3    0.44    0.40
 -14  -4  -3   -0.09    0.37
  13   4   3    1.35    0.45
 -13  -4  -3    2.07    0.51
 -13  -4  -3    1.06    0.58
  12   4   3   14.36    0.95
 -12  -4  -3   13.41    0.93
 -12  -4  -3   13.81    1.06
  11   4   3    3.38    0.57
 -11  -4  -3    2.59    0.53
 -11  -4  -3    4.37    0.74
  10   4   3    3.63    0.54
 -10  -4  -3    3.74    0.53
 -10  -4  -3    4.21    0.64
   9   4   3    3.38    0.48
  -9  -4  -3    2.80    0.46
  -9  -4  -3    4.22    0.60
   8   4   3   12.92    0.74
  -8  -4  -3   12.23    0.74
  -8  -4  -3   13.03    0.81
   7   4   3   19.10    0.83
  -7  -4  -3   17.91    0.79
  -7  -4  -3   18.56    0.93
   6   4   3    6.88    0.46
  -6  -4  -3    7.11    0.53
  -6  -4  -3    6.87    0.47
   5   4   3    9.99    0.50
  -5  -4  -3    9.89    0.59
  -5  -4  -3    9.61    0.49
   4   4   3   18.45    0.64
  -4  -4  -3   17.61    0.64
  -4  -4  -3   17.35    0.72
   3   4   3    3.89    0.26
  -3  -4  -3    3.82    0.26
  -3  -4  -3    3.63    0.29
   2   4   3  111.91    2.40
   2   4   3  109.53    2.27
  -2  -4  -3  110.33    2.25
  -2  -4  -3  111.27    2.41
   1   4   3   11.94    0.36
   1   4   3   11.83    0.43
  -1  -4  -3   11.69    0.35
  -1  -4  -3   11.78    0.41
   0   4   3  375.31    6.98
   0   4   3  372.44    7.24
   0   4   3  371.28    7.58
   0  -4  -3  364.94    7.27
   0  -4  -3  378.43    7.01
   0  -4  -3  380.08    7.30
   0  -4  -3  375.56    6.98
  -1   4   3  478.14    9.66
  -1   4   3  481.47    9.22
   1  -4  -3  474.49    8.98
   1  -4  -3  467.58    9.24
   1  -4  -3  485.08    9.28
  -2   4   3   11.26    0.39
  -2   4   3   12.18    0.33
  -2   4   3   12.09    0.52
   2  -4  -3   11.79    0.40
   2  -4  -3   11.88    0.37
   2  -4  -3   12.36    0.40
  -3   4   3   92.90    1.91
  -3   4   3   93.11    1.89
  -3   4   3   90.32    2.24
   3  -4  -3   90.86    2.04
   3  -4  -3   94.51    1.95
   3  -4  -3   94.41    2.06
  -4   4   3  208.57    4.04
  -4   4   3  202.23    4.03
  -4   4   3  200.71    4.26
   4  -4  -3  207.93    4.27
   4  -4  -3  204.47    4.09
   4  -4  -3  205.31    4.30
  -5   4   3  119.26    2.53
  -5   4   3  121.26    2.53
  -5   4   3  118.85    2.73
   5  -4  -3  118.91    2.59
   5  -4  -3  122.11    2.82
   5  -4  -3  118.36    2.71
  -6   4   3    3.19    0.38
  -6   4   3    3.08    0.30
  -6   4   3    3.56    0.28
   6  -4  -3    2.73    0.31
   6  -4  -3    2.81    0.33
  -7   4   3   21.69    0.91
  -7   4   3   22.01    0.78
  -7   4   3   20.63    0.75
   7  -4  -3   21.35    0.88
   7  -4  -3   21.28    0.84
  -8   4   3    0.05    0.17
  -8   4   3    0.44    0.21
  -8   4   3    0.21    0.24
   8  -4  -3    0.23    0.21
   8  -4  -3   -0.11    0.18
  -9   4   3    8.60    0.56
  -9   4   3    8.23    0.67
  -9   4   3    8.67    0.55
   9  -4  -3    8.69    0.67
   9  -4  -3    8.36    0.61
 -10   4   3   17.50    1.00
 -10   4   3   18.03    0.84
 -10   4   3   20.07    0.89
  10  -4  -3   20.77    1.00
 -11   4   3   -0.08    0.25
 -11   4   3    0.56    0.32
  11  -4  -3    0.45    0.37
 -12   4   3    4.52    0.56
 -12   4   3    3.52    0.51
  12  -4  -3    4.33    0.64
 -13   4   3    8.52    0.78
 -13   4   3    7.77    0.98
 -13   4   3    8.53    0.77
  13  -4  -3    9.00    0.88
 -14   4   3    1.92    0.48
 -14   4   3    2.15    0.67
  14  -4  -3    0.97    0.52
  14   5   3    8.31    0.97
 -14  -5  -3    6.89    0.87
 -14  -5  -3    6.98    1.02
  13   5   3   -0.33    0.37
 -13  -5  -3    0.25    0.50
 -13  -5  -3   -0.31    0.39
  12   5   3    1.21    0.46
 -12  -5  -3    0.47    0.45
 -12  -5  -3    0.17    0.35
  11   5   3    9.56    0.85
 -11  -5  -3    9.65    0.98
 -11  -5  -3   10.93    0.85
  10   5   3    0.56    0.32
 -10  -5  -3    0.07    0.32
 -10  -5  -3    0.05    0.30
   9   5   3    0.56    0.29
  -9  -5  -3   -0.09    0.25
  -9  -5  -3    0.05    0.36
   8   5   3   35.76    1.27
  -8  -5  -3   34.88    1.40
  -8  -5  -3   35.64    1.28
   7   5   3    4.13    0.47
  -7  -5  -3    4.42    0.56
  -7  -5  -3    3.06    0.40
   6   5   3    7.02    0.48
  -6  -5  -3    7.14    0.55
  -6  -5  -3    6.67    0.47
   5   5   3   63.88    1.63
  -5  -5  -3   63.66    1.63
  -5  -5  -3   65.49    1.79
   4   5   3   22.94    0.76
  -4  -5  -3   23.19    0.76
  -4  -5  -3   23.26    0.85
   3   5   3    8.23    0.40
  -3  -5  -3    9.10    0.48
  -3  -5  -3    8.41    0.39
   2   5   3   76.77    1.67
   2   5   3   76.87    1.77
  -2  -5  -3   76.32    1.64
  -2  -5  -3   77.23    1.80
   1   5   3   33.33    0.81
   1   5   3   34.42    0.93
  -1  -5  -3   34.54    0.80
  -1  -5  -3   32.98    0.89
   0   5   3    8.19    0.40
   0   5   3    7.90    0.29
   0   5   3    7.96    0.28
   0  -5  -3    8.06    0.34
   0  -5  -3    7.90    0.28
  -1   5   3    9.18    0.30
  -1   5   3    8.49    0.43
  -1   5   3    8.92    0.30
   1  -5  -3    8.76    0.36
   1  -5  -3    9.27    0.30
   1  -5  -3    8.88    0.33
  -2   5   3  163.84    3.33
  -2   5   3  164.06    3.63
   2  -5  -3  163.22    3.34
   2  -5  -3  162.15    3.36
   2  -5  -3  160.45    3.18
  -3   5   3   67.96    1.45
  -3   5   3   68.20    1.80
   3  -5  -3   69.43    1.58
   3  -5  -3   66.38    1.59
   3  -5  -3   67.09    1.49
  -4   5   3   11.27    0.42
  -4   5   3   11.22    0.43
   4  -5  -3   11.16    0.45
   4  -5  -3   11.39    0.51
   4  -5  -3   11.27    0.50
  -5   5   3    3.37    0.34
  -5   5   3    3.75    0.27
  -5   5   3    4.05    0.28
   5  -5  -3    3.83    0.36
   5  -5  -3    3.45    0.36
   5  -5  -3    3.46    0.31
  -6   5   3   22.84    0.74
  -6   5   3   22.78    0.87
  -6   5   3   22.89    0.75
   6  -5  -3   22.54    0.81
   6  -5  -3   22.55    0.85
  -7   5   3    0.24    0.17
  -7   5   3    0.08    0.16
  -7   5   3    0.13    0.20
   7  -5  -3    0.86    0.25
   7  -5  -3    0.28    0.18
  -8   5   3    4.91    0.45
  -8   5   3    4.84    0.53
  -8   5   3    4.26    0.41
   8  -5  -3    5.31    0.53
   8  -5  -3    5.14    0.55
  -9   5   3    0.51    0.25
  -9   5   3    0.93    0.28
  -9   5   3    1.21    0.33
   9  -5  -3    0.64    0.29
   9  -5  -3    0.69    0.34
 -10   5   3    2.52    0.40
 -10   5   3    1.78    0.35
  10  -5  -3    1.47    0.39
  10  -5  -3    1.45    0.39
 -11   5   3   20.97    0.94
 -11   5   3   21.83    0.98
  11  -5  -3   21.33    1.08
 -12   5   3    0.82    0.33
 -12   5   3    0.68    0.32
  12  -5  -3    1.83    0.50
 -13   5   3    0.02    0.49
 -13   5   3    0.06    0.31
  13  -5  -3   -0.91    0.32
 -14   5   3    1.83    0.48
 -14   5   3    1.62    0.63
  14  -5  -3    2.00    0.55
  13   6   3    0.85    0.40
 -13  -6  -3   -0.25    0.42
 -13  -6  -3    1.44    0.60
  12   6   3    3.07    0.56
 -12  -6  -3    2.57    0.53
 -12  -6  -3    1.85    0.63
  11   6   3   -0.16    0.32
 -11  -6  -3    0.38    0.35
 -11  -6  -3    0.56    0.43
  10   6   3    6.51    0.67
 -10  -6  -3    7.39    0.82
 -10  -6  -3    6.44    0.68
   9   6   3    7.34    0.70
  -9  -6  -3    6.63    0.66
  -9  -6  -3    6.11    0.72
   8   6   3    2.27    0.43
  -8  -6  -3    2.92    0.44
  -8  -6  -3    3.49    0.54
   7   6   3   18.97    0.85
  -7  -6  -3   17.02    0.83
  -7  -6  -3   18.91    0.94
   6   6   3    0.32    0.19
  -6  -6  -3    0.12    0.18
  -6  -6  -3   -0.25    0.17
   5   6   3   38.42    1.14
  -5  -6  -3   38.52    1.13
  -5  -6  -3   36.47    1.24
   4   6   3    2.42    0.28
  -4  -6  -3    2.80    0.35
  -4  -6  -3    2.37    0.27
   3   6   3    2.06    0.25
  -3  -6  -3    1.45    0.28
  -3  -6  -3    2.01    0.24
   2   6   3  172.23    3.68
   2   6   3  172.99    3.47
  -2  -6  -3  173.10    3.68
  -2  -6  -3  171.26    3.44
   1   6   3   33.53    0.84
   1   6   3   33.43    0.95
  -1  -6  -3   33.57    0.94
  -1  -6  -3   33.49    0.82
   0   6   3   21.34    0.74
   0   6   3   22.61    0.61
   0   6   3   22.27    0.60
   0  -6  -3   23.10    0.60
   0  -6  -3   22.65    0.69
  -1   6   3    1.15    0.23
  -1   6   3    1.24    0.15
  -1   6   3    1.16    0.14
   1  -6  -3    1.18    0.18
   1  -6  -3    1.39    0.18
   1  -6  -3    1.34    0.15
  -2   6   3    1.99    0.30
  -2   6   3    2.32    0.22
   2  -6  -3    1.73    0.22
   2  -6  -3    2.13    0.22
   2  -6  -3    2.20    0.20
  -3   6   3    6.51    0.29
  -3   6   3    6.33    0.47
   3  -6  -3    6.54    0.35
   3  -6  -3    6.73    0.33
   3  -6  -3    6.95    0.37
  -4   6   3   76.99    1.67
  -4   6   3   72.91    2.06
   4  -6  -3   75.18    1.84
   4  -6  -3   77.23    1.83
   4  -6  -3   75.66    1.72
  -5   6   3   35.36    1.08
  -5   6   3   36.05    0.95
  -5   6   3   36.14    0.98
   5  -6  -3   34.28    1.00
   5  -6  -3   34.48    1.08
  -6   6   3    0.11    0.18
  -6   6   3    0.23    0.16
  -6   6   3   -0.03    0.13
   6  -6  -3    0.14    0.17
   6  -6  -3   -0.04    0.16
  -7   6   3   15.59    0.76
  -7   6   3   17.86    0.69
  -7   6   3   16.04    0.65
   7  -6  -3   16.08    0.72
   7  -6  -3   14.11    0.73
  -8   6   3    8.16    0.51
  -8   6   3    9.19    0.53
  -8   6   3   10.49    0.67
   8  -6  -3    8.06    0.62
   8  -6  -3    8.64    0.60
  -9   6   3    5.08    0.48
  -9   6   3    5.71    0.51
   9  -6  -3    5.16    0.61
   9  -6  -3    5.16    0.56
 -10   6   3    0.22    0.26
 -10   6   3    0.32    0.24
  10  -6  -3    0.21    0.28
  10  -6  -3    0.00    0.29
 -11   6   3    6.49    0.60
 -11   6   3    6.71    0.63
  11  -6  -3    6.27    0.68
 -12   6   3    0.63    0.51
 -12   6   3   -0.16    0.27
  12  -6  -3   -0.30    0.31
 -13   6   3    0.32    0.56
 -13   6   3    0.86    0.36
  13  -6  -3    0.99    0.43
  14  -6  -3    0.80    0.49
  13   7   3    1.08    0.44
 -13  -7  -3    0.56    0.42
 -13  -7  -3   -0.14    0.47
  12   7   3    0.39    0.40
 -12  -7  -3    0.28    0.47
 -12  -7  -3    0.01    0.35
  11   7   3   26.61    1.23
 -11  -7  -3   27.84    1.49
 -11  -7  -3   25.61    1.30
  10   7   3    0.31    0.35
 -10  -7  -3   -0.22    0.31
 -10  -7  -3   -0.16    0.33
   9   7   3    2.38    0.48
  -9  -7  -3    2.42    0.55
  -9  -7  -3    2.92    0.50
   8   7   3    8.99    0.66
  -8  -7  -3   10.33    0.79
  -8  -7  -3    9.89    0.67
   7   7   3    6.64    0.51
  -7  -7  -3    7.12    0.69
  -7  -7  -3    7.28    0.63
   6   7   3   -0.26    0.16
  -6  -7  -3   -0.14    0.17
  -6  -7  -3   -0.05    0.24
   5   7   3    3.98    0.40
  -5  -7  -3    4.04    0.47
  -5  -7  -3    3.49    0.37
   4   7   3   10.22    0.50
  -4  -7  -3    9.76    0.59
  -4  -7  -3    9.70    0.48
   3   7   3   27.82    0.84
  -3  -7  -3   25.94    0.80
  -3  -7  -3   27.39    0.94
   2   7   3   71.11    1.69
   2   7   3   68.83    1.58
  -2  -7  -3   66.07    1.55
  -2  -7  -3   68.25    1.73
   1   7   3    2.35    0.23
   1   7   3    1.85    0.25
  -1  -7  -3    2.24    0.27
  -1  -7  -3    1.86    0.20
   0   7   3    0.57    0.13
   0   7   3    0.82    0.14
   0   7   3    0.71    0.19
   0  -7  -3    1.14    0.21
   0  -7  -3    0.53    0.13
  -1   7   3   21.56    0.83
  -1   7   3   23.09    0.64
  -1   7   3   23.19    0.63
   1  -7  -3   23.13    0.75
   1  -7  -3   23.01    0.71
   1  -7  -3   22.91    0.63
  -2   7   3   18.06    0.79
  -2   7   3   18.48    0.59
   2  -7  -3   17.82    0.55
   2  -7  -3   17.85    0.61
   2  -7  -3   17.60    0.64
  -3   7   3    9.47    0.59
   3  -7  -3    9.28    0.40
   3  -7  -3    9.97    0.47
   3  -7  -3    9.95    0.45
  -4   7   3   33.62    0.87
  -4   7   3   32.43    1.21
   4  -7  -3   30.93    0.99
   4  -7  -3   33.71    0.93
   4  -7  -3   32.80    0.99
  -5   7   3   73.11    2.11
  -5   7   3   75.55    1.65
  -5   7   3   58.71    1.75
   5  -7  -3   74.14    1.87
   5  -7  -3   73.66    1.72
  -6   7   3    6.79    0.48
  -6   7   3    7.29    0.41
  -6   7   3    8.34    0.46
   6  -7  -3    8.49    0.50
   6  -7  -3    7.98    0.53
  -7   7   3   16.57    0.79
  -7   7   3   17.10    0.69
  -7   7   3   16.12    0.65
   7  -7  -3   16.04    0.72
   7  -7  -3   16.85    0.82
  -8   7   3    0.97    0.25
  -8   7   3    0.35    0.26
  -8   7   3    0.67    0.24
   8  -7  -3    0.66    0.26
   8  -7  -3    0.35    0.24
  -9   7   3    2.23    0.37
  -9   7   3    2.48    0.36
   9  -7  -3    2.37    0.45
   9  -7  -3    1.94    0.40
 -10   7   3   22.70    0.97
 -10   7   3   24.56    1.34
 -10   7   3   24.66    0.96
  10  -7  -3   24.14    1.15
  10  -7  -3   22.79    1.04
 -11   7   3    1.00    0.52
 -11   7   3    0.80    0.32
  11  -7  -3    1.33    0.38
  11  -7  -3    2.03    0.51
 -12   7   3    6.28    0.61
 -12   7   3    5.90    0.89
  12  -7  -3    7.15    0.76
 -13   7   3    6.64    0.69
 -13   7   3    7.98    1.10
  13  -7  -3    6.49    0.81
  13   8   3    1.86    0.58
 -13  -8  -3    1.10    0.53
 -13  -8  -3    2.73    0.69
  12   8   3    9.03    0.90
 -12  -8  -3   10.35    1.00
 -12  -8  -3    9.58    1.09
  11   8   3    3.99    0.61
 -11  -8  -3    2.83    0.64
 -11  -8  -3    3.99    0.67
  10   8   3   -0.12    0.29
 -10  -8  -3    0.50    0.46
 -10  -8  -3    0.74    0.38
   9   8   3    0.68    0.33
  -9  -8  -3    0.46    0.35
  -9  -8  -3   -0.14    0.31
   8   8   3    0.81    0.30
  -8  -8  -3    0.94    0.38
  -8  -8  -3    1.23    0.35
   7   8   3    3.33    0.46
  -7  -8  -3    3.63    0.49
  -7  -8  -3    3.79    0.55
   6   8   3    1.87    0.32
  -6  -8  -3    1.68    0.33
  -6  -8  -3    2.01    0.40
   5   8   3   17.03    0.72
  -5  -8  -3   15.25    0.70
  -5  -8  -3   16.32    0.83
   4   8   3   12.36    0.58
  -4  -8  -3   11.19    0.65
  -4  -8  -3   13.06    0.58
   3   8   3    0.27    0.16
   3   8   3    0.14    0.15
  -3  -8  -3    0.57    0.22
  -3  -8  -3    0.44    0.16
   2   8   3   56.01    1.36
   2   8   3   56.43    1.47
  -2  -8  -3   53.69    1.50
  -2  -8  -3   56.08    1.35
   1   8   3    9.03    0.48
   1   8   3    9.27    0.41
  -1  -8  -3   10.02    0.51
  -1  -8  -3    8.71    0.39
   0   8   3   15.62    0.56
   0   8   3   19.04    0.75
   0   8   3   19.35    0.59
   0  -8  -3   19.56    0.59
   0  -8  -3   20.09    0.71
  -1   8   3    1.92    0.21
  -1   8   3    1.89    0.33
  -1   8   3    1.77    0.20
   1  -8  -3    2.10    0.27
   1  -8  -3    2.21    0.26
   1  -8  -3    1.80    0.20
  -2   8   3    8.57    0.54
  -2   8   3    8.05    0.38
   2  -8  -3    8.40    0.45
   2  -8  -3    8.57    0.43
   2  -8  -3    8.15    0.37
  -3   8   3   15.08    0.76
   3  -8  -3   14.60    0.54
   3  -8  -3   14.35    0.61
   3  -8  -3   14.48    0.58
  -4   8   3  177.02    3.60
  -4   8   3  178.23    4.27
   4  -8  -3  177.70    3.91
   4  -8  -3  181.66    3.88
   4  -8  -3  180.93    3.69
  -5   8   3    3.92    0.52
  -5   8   3    4.02    0.30
   5  -8  -3    3.92    0.43
   5  -8  -3    3.18    0.34
  -6   8   3   33.88    1.13
  -6   8   3   32.98    0.97
  -6   8   3   31.03    1.34
   6  -8  -3   34.48    1.18
   6  -8  -3   33.19    1.06
  -7   8   3   16.02    0.68
  -7   8   3   15.62    0.96
  -7   8   3   14.60    0.62
  -7   8   3   15.02    0.76
   7  -8  -3   14.79    0.72
   7  -8  -3   15.55    0.80
  -8   8   3    5.19    0.46
  -8   8   3    4.05    0.64
  -8   8   3    5.50    0.49
   8  -8  -3    5.69    0.61
   8  -8  -3    4.51    0.47
  -9   8   3    0.39    0.26
  -9   8   3    0.70    0.26
  -9   8   3    0.43    0.38
   9  -8  -3    0.75    0.32
   9  -8  -3    0.04    0.28
 -10   8   3   26.77    1.07
 -10   8   3   25.54    0.99
 -10   8   3   23.98    1.38
  10  -8  -3   25.06    1.13
  10  -8  -3   26.95    1.26
 -11   8   3    2.21    0.39
 -11   8   3    1.53    0.53
  11  -8  -3    1.65    0.49
  11  -8  -3    2.07    0.47
 -12   8   3    3.08    0.73
 -12   8   3    2.75    0.45
  12  -8  -3    4.22    0.70
  12  -8  -3    3.19    0.56
 -13   8   3    0.58    0.31
 -13   8   3    0.48    0.54
  13  -8  -3    0.35    0.41
  13   9   3    0.38    0.40
 -13  -9  -3    1.29    0.58
 -13  -9  -3   -0.22    0.46
  12   9   3    2.82    0.60
 -12  -9  -3    3.06    0.63
 -12  -9  -3    1.64    0.60
  11   9   3   -0.09    0.33
 -11  -9  -3    0.15    0.32
 -11  -9  -3    0.38    0.48
  10   9   3   11.22    0.83
 -10  -9  -3   10.50    0.82
 -10  -9  -3   10.83    1.07
   9   9   3   -0.13    0.27
  -9  -9  -3    0.67    0.36
  -9  -9  -3   -0.04    0.29
   8   9   3    5.68    0.60
  -8  -9  -3    4.51    0.56
  -8  -9  -3    5.89    0.71
   7   9   3   13.24    0.73
  -7  -9  -3   12.72    0.85
  -7  -9  -3   13.13    0.76
   6   9   3   30.14    1.09
  -6  -9  -3   29.15    1.08
  -6  -9  -3   29.25    1.22
   5   9   3    5.19    0.49
  -5  -9  -3    3.81    0.48
  -5  -9  -3    4.54    0.45
   4   9   3   18.58    0.74
  -4  -9  -3   17.49    0.72
  -4  -9  -3   17.93    0.84
   3   9   3    5.14    0.35
   3   9   3    5.65    0.38
  -3  -9  -3    4.24    0.45
  -3  -9  -3    4.31    0.34
   2   9   3   36.28    1.09
   2   9   3   37.79    1.02
  -2  -9  -3   35.21    0.99
  -2  -9  -3   33.40    1.12
   1   9   3    7.91    0.40
   1   9   3    7.08    0.45
  -1  -9  -3    7.88    0.39
  -1  -9  -3    7.20    0.47
   0   9   3   12.06    0.60
   0   9   3    9.67    0.44
   0   9   3   12.67    0.48
   0  -9  -3   13.26    0.60
   0  -9  -3   13.05    0.49
  -1   9   3   96.46    2.05
  -1   9   3   93.70    2.44
  -1   9   3   94.99    2.12
   1  -9  -3   93.05    2.27
   1  -9  -3   97.94    2.22
   1  -9  -3   92.95    2.06
  -2   9   3   22.56    0.96
  -2   9   3   22.97    0.68
  -2   9   3   21.46    0.71
   2  -9  -3   21.47    0.77
   2  -9  -3   21.58    0.80
   2  -9  -3   22.26    0.70
  -3   9   3   75.57    1.87
  -3   9   3   79.19    2.24
   3  -9  -3   81.53    1.95
   3  -9  -3   77.43    1.80
   3  -9  -3   80.27    1.99
  -4   9   3    0.18    0.26
  -4   9   3    0.04    0.11
   4  -9  -3    0.36    0.21
   4  -9  -3    0.18    0.16
   4  -9  -3    0.11    0.16
  -5   9   3   65.17    2.09
  -5   9   3   64.55    1.54
   5  -9  -3   66.12    1.81
   5  -9  -3   66.61    1.67
  -6   9   3    0.31    0.17
  -6   9   3    0.17    0.29
  -6   9   3   -0.09    0.15
   6  -9  -3    0.21    0.19
   6  -9  -3    0.02    0.22
  -7   9   3    1.30    0.24
  -7   9   3    1.79    0.48
   7  -9  -3    1.17    0.30
   7  -9  -3    0.99    0.32
  -8   9   3    0.07    0.36
  -8   9   3    0.27    0.21
   8  -9  -3    0.07    0.23
   8  -9  -3   -0.27    0.24
  -9   9   3    0.29    0.23
  -9   9   3   -0.44    0.31
  -9   9   3    0.27    0.24
   9  -9  -3    0.20    0.27
   9  -9  -3   -0.19    0.26
 -10   9   3    0.52    0.26
 -10   9   3    0.49    0.46
  10  -9  -3   -0.05    0.31
  10  -9  -3    0.64    0.36
 -11   9   3   -0.04    0.24
 -11   9   3    1.10    0.50
  11  -9  -3    0.19    0.35
  11  -9  -3    0.15    0.37
 -12   9   3    0.91    0.54
 -12   9   3    1.32    0.37
  12  -9  -3    1.86    0.48
  12  -9  -3    1.58    0.49
 -13   9   3    1.40    0.39
 -13   9   3    0.37    0.56
  13  -9  -3    1.01    0.47
  12  10   3    0.31    0.33
 -12 -10  -3    0.01    0.43
 -12 -10  -3   -0.43    0.42
  11  10   3   -0.14    0.33
 -11 -10  -3   -0.13    0.38
 -11 -10  -3    0.69    0.45
  10  10   3    8.73    0.81
 -10 -10  -3    8.77    0.99
 -10 -10  -3    8.35    0.85
   9  10   3    2.39    0.48
  -9 -10  -3    1.25    0.53
  -9 -10  -3    1.90    0.50
   8  10   3    2.83    0.48
  -8 -10  -3    3.15    0.52
  -8 -10  -3    3.08    0.58
   7  10   3    3.39    0.48
  -7 -10  -3    3.39    0.48
  -7 -10  -3    2.52    0.54
   6  10   3   40.21    1.33
  -6 -10  -3   39.68    1.35
  -6 -10  -3   40.39    1.52
   5  10   3    0.19    0.21
  -5 -10  -3    0.57    0.33
  -5 -10  -3    0.96    0.29
   4  10   3    7.53    0.49
  -4 -10  -3    7.09    0.55
  -4 -10  -3    6.76    0.46
   3  10   3   -0.10    0.15
   3  10   3    0.50    0.19
  -3 -10  -3   -0.12    0.12
  -3 -10  -3    0.01    0.18
   2  10   3    6.76    0.44
   2  10   3    6.98    0.41
  -2 -10  -3    7.10    0.41
  -2 -10  -3    7.29    0.52
   1  10   3   14.72    0.57
   1  10   3   14.62    0.68
  -1 -10  -3   14.05    0.56
  -1 -10  -3   15.05    0.71
   0  10   3    9.24    0.44
   0  10   3   10.87    0.46
   0  10   3   10.14    0.58
   0 -10  -3   11.07    0.60
   0 -10  -3   10.06    0.46
  -1  10   3    0.48    0.25
  -1  10   3    0.70    0.16
  -1  10   3    0.82    0.18
   1 -10  -3    0.51    0.17
   1 -10  -3    0.47    0.21
  -2  10   3    5.83    0.34
  -2  10   3    4.93    0.53
  -2  10   3    4.93    0.34
   2 -10  -3    4.90    0.40
   2 -10  -3    5.33    0.34
   2 -10  -3    5.42    0.41
  -3  10   3    0.36    0.18
  -3  10   3    0.16    0.23
   3 -10  -3    0.20    0.18
   3 -10  -3    0.05    0.15
   3 -10  -3   -0.24    0.14
  -4  10   3    1.76    0.28
  -4  10   3    1.54    0.39
   4 -10  -3    1.42    0.29
   4 -10  -3    1.48    0.25
  -5  10   3   35.75    1.49
   5 -10  -3   37.90    1.13
   5 -10  -3   37.48    1.26
  -6  10   3   20.87    0.72
  -6  10   3   22.21    1.17
   6 -10  -3   21.71    0.96
   6 -10  -3   20.54    0.83
  -7  10   3   -0.01    0.18
  -7  10   3    0.20    0.35
   7 -10  -3    0.92    0.34
   7 -10  -3   -0.14    0.20
  -8  10   3    1.03    0.26
  -8  10   3    1.57    0.51
   8 -10  -3    1.28    0.31
   8 -10  -3    1.10    0.34
  -9  10   3    1.88    0.32
  -9  10   3    2.30    0.58
   9 -10  -3    2.40    0.43
   9 -10  -3    2.35    0.49
 -10  10   3    1.08    0.47
 -10  10   3    0.56    0.26
  10 -10  -3    1.16    0.35
  10 -10  -3    0.64    0.37
 -11  10   3    0.20    0.25
 -11  10   3    0.67    0.48
  11 -10  -3    0.17    0.34
  11 -10  -3    0.83    0.42
 -12  10   3    9.19    0.63
 -12  10   3    8.37    1.18
  12 -10  -3    9.13    0.87
  12 -10  -3    9.18    0.96
 -12 -11  -3    1.36    0.63
 -12 -11  -3    0.39    0.42
  11  11   3    0.75    0.41
 -11 -11  -3    0.21    0.40
 -11 -11  -3   -0.03    0.53
  10  11   3    3.48    0.59
 -10 -11  -3    4.72    0.79
 -10 -11  -3    3.51    0.60
   9  11   3    3.07    0.53
  -9 -11  -3    2.45    0.56
  -9 -11  -3    2.64    0.52
   8  11   3    6.62    0.67
  -8 -11  -3    5.95    0.67
  -8 -11  -3    5.94    0.72
   7  11   3    0.67    0.34
  -7 -11  -3    1.48    0.36
  -7 -11  -3    1.25    0.47
   6  11   3    3.78    0.48
  -6 -11  -3    4.45    0.50
  -6 -11  -3    3.67    0.55
   5  11   3   12.81    0.68
  -5 -11  -3   11.65    0.66
  -5 -11  -3   12.50    0.80
   4  11   3   25.26    0.93
  -4 -11  -3   25.77    1.10
  -4 -11  -3   25.73    0.96
   3  11   3   15.81    0.69
   3  11   3   15.62    0.69
  -3 -11  -3   15.51    0.67
  -3 -11  -3   15.34    0.80
   2  11   3    3.63    0.41
   2  11   3    3.45    0.35
  -2 -11  -3    3.03    0.34
  -2 -11  -3    3.08    0.44
   1  11   3   35.76    1.19
   1  11   3   33.96    1.00
  -1 -11  -3   34.70    1.21
  -1 -11  -3   31.73    0.99
   0  11   3    3.67    0.34
   0  11   3    3.36    0.44
   0  11   3    3.81    0.34
   0 -11  -3    3.31    0.33
   0 -11  -3    4.04    0.46
  -1  11   3    0.25    0.15
  -1  11   3    0.13    0.15
  -1  11   3   -0.10    0.22
   1 -11  -3   -0.06    0.14
   1 -11  -3   -0.18    0.14
  -2  11   3   10.44    0.47
  -2  11   3    9.35    0.48
  -2  11   3   10.78    0.70
   2 -11  -3    9.15    0.48
   2 -11  -3   10.35    0.60
   2 -11  -3    9.83    0.56
  -3  11   3    0.97    0.21
  -3  11   3    0.69    0.22
  -3  11   3    1.14    0.35
   3 -11  -3    0.82    0.21
   3 -11  -3    0.59    0.22
  -4  11   3    6.09    0.71
  -4  11   3    6.05    0.45
   4 -11  -3    5.30    0.52
   4 -11  -3    5.85    0.42
  -5  11   3    5.58    0.69
   5 -11  -3    6.59    0.60
   5 -11  -3    7.44    0.49
  -6  11   3   13.67    0.97
   6 -11  -3   14.51    0.71
   6 -11  -3   13.76    0.80
  -7  11   3    2.52    0.57
  -7  11   3    2.47    0.30
   7 -11  -3    3.01    0.46
   7 -11  -3    2.46    0.39
  -8  11   3    1.65    0.54
  -8  11   3    0.82    0.24
   8 -11  -3    1.16    0.37
   8 -11  -3    1.31    0.35
  -9  11   3   17.63    0.74
  -9  11   3   20.73    1.33
   9 -11  -3   17.84    0.93
   9 -11  -3   17.41    1.03
 -10  11   3    2.07    0.62
 -10  11   3    2.34    0.35
  10 -11  -3    1.99    0.45
  10 -11  -3    2.19    0.52
 -11  11   3    6.13    0.53
 -11  11   3    5.79    0.96
  11 -11  -3    6.92    0.84
  11 -11  -3    6.29    0.71
 -12  11   3    1.90    0.36
 -12  11   3    1.32    0.74
  12 -11  -3    2.01    0.57
  12 -11  -3    2.49    0.54
 -11 -12  -3   -0.77    0.39
 -11 -12  -3   -0.11    0.36
 -10 -12  -3    3.51    0.71
 -10 -12  -3    3.89    0.65
   9  12   3    0.03    0.33
  -9 -12  -3    1.09    0.45
  -9 -12  -3    0.68    0.46
   8  12   3   -0.40    0.23
  -8 -12  -3   -0.67    0.33
  -8 -12  -3    0.60    0.34
   7  12   3    6.07    0.60
  -7 -12  -3    3.62    0.60
  -7 -12  -3    6.09    0.63
   6  12   3   13.49    0.75
  -6 -12  -3   12.03    0.77
  -6 -12  -3   11.86    0.84
   5  12   3    1.12    0.32
  -5 -12  -3    1.32    0.35
  -5 -12  -3    0.24    0.35
   4  12   3   48.38    1.44
  -4 -12  -3   51.22    1.71
  -4 -12  -3   47.33    1.46
   3  12   3    0.51    0.24
   3  12   3    0.53    0.22
   3  12   3    0.37    0.22
  -3 -12  -3    0.71    0.28
  -3 -12  -3    0.06    0.21
   2  12   3   -0.12    0.20
   2  12   3   -0.01    0.08
   2  12   3    0.19    0.18
  -2 -12  -3    0.25    0.27
  -2 -12  -3    0.19    0.20
   1  12   3   42.94    1.19
   1  12   3   40.66    1.37
  -1 -12  -3   41.66    1.42
  -1 -12  -3   41.43    1.21
   0  12   3   14.88    0.79
   0  12   3   16.28    0.64
   0  12   3   16.32    0.64
   0 -12  -3   17.04    0.81
   0 -12  -3   17.31    0.69
  -1  12   3   29.76    0.93
  -1  12   3   29.91    1.21
  -1  12   3   31.08    0.93
   1 -12  -3   30.71    0.96
   1 -12  -3   32.24    1.16
  -2  12   3   59.40    1.45
  -2  12   3   56.74    1.88
   2 -12  -3   57.00    1.70
   2 -12  -3   54.95    1.48
  -3  12   3   18.42    0.68
  -3  12   3   17.48    0.98
   3 -12  -3   15.92    0.69
   3 -12  -3   17.91    0.84
  -4  12   3   11.03    0.86
   4 -12  -3   11.50    0.69
   4 -12  -3   10.69    0.59
  -5  12   3   41.57    1.73
   5 -12  -3   45.43    1.34
   5 -12  -3   43.92    1.49
  -6  12   3    4.80    0.70
   6 -12  -3    5.15    0.58
   6 -12  -3    4.94    0.49
  -7  12   3    7.59    0.89
   7 -12  -3    6.84    0.70
   7 -12  -3    6.26    0.57
  -8  12   3    0.54    0.50
   8 -12  -3    0.99    0.35
   8 -12  -3    0.59    0.35
  -9  12   3    4.63    0.40
  -9  12   3    4.19    0.77
   9 -12  -3    3.74    0.61
   9 -12  -3    4.33    0.55
 -10  12   3    0.15    0.20
 -10  12   3   -0.44    0.38
  10 -12  -3   -0.19    0.31
  10 -12  -3    0.05    0.33
 -11  12   3   -0.05    0.21
 -11  12   3    0.22    0.47
  11 -12  -3   -0.44    0.29
  11 -12  -3   -0.42    0.32
 -11 -13  -3    0.05    0.47
 -11 -13  -3   -0.03    0.37
 -10 -13  -3    5.29    0.79
 -10 -13  -3    6.61    0.92
  -9 -13  -3   -0.43    0.33
  -9 -13  -3   -0.14    0.34
  -8 -13  -3    5.89    0.78
  -8 -13  -3    5.27    0.67
   7  13   3    0.74    0.32
  -7 -13  -3    0.77    0.36
  -7 -13  -3    0.31    0.37
   6  13   3    3.55    0.48
  -6 -13  -3    2.74    0.45
  -6 -13  -3    2.62    0.53
   5  13   3    3.04    0.44
  -5 -13  -3    3.90    0.50
  -5 -13  -3    3.02    0.55
   4  13   3    2.17    0.36
  -4 -13  -3    1.44    0.43
  -4 -13  -3    2.29    0.39
   3  13   3   14.00    0.69
   3  13   3   13.37    0.68
  -3 -13  -3   12.66    0.69
  -3 -13  -3   14.88    0.86
   2  13   3    2.15    0.37
   2  13   3    2.08    0.32
  -2 -13  -3    1.64    0.40
  -2 -13  -3    2.02    0.34
   1  13   3   20.46    0.92
   1  13   3   19.33    0.76
  -1 -13  -3   18.09    0.92
  -1 -13  -3   20.08    0.80
   0  13   3   81.92    2.37
   0  13   3   85.74    2.01
   0 -13  -3   83.83    2.34
   0 -13  -3   84.80    2.06
  -1  13   3    0.99    0.37
  -1  13   3    1.00    0.25
   1 -13  -3    1.86    0.30
   1 -13  -3    1.12    0.34
  -2  13   3    0.35    0.33
  -2  13   3    0.16    0.18
   2 -13  -3    0.20    0.21
   2 -13  -3    0.31    0.26
  -3  13   3    3.55    0.57
   3 -13  -3    3.62    0.41
   3 -13  -3    3.79    0.48
  -4  13   3    5.64    0.73
   4 -13  -3    5.23    0.57
   4 -13  -3    4.65    0.46
  -5  13   3    5.30    0.73
   5 -13  -3    5.25    0.50
   5 -13  -3    4.19    0.54
  -6  13   3    0.11    0.36
   6 -13  -3    0.24    0.28
   6 -13  -3    0.18    0.25
  -7  13   3    0.85    0.53
   7 -13  -3    0.19    0.25
   7 -13  -3    0.06    0.22
  -8  13   3    7.25    0.95
   8 -13  -3    7.24    0.78
   8 -13  -3    8.71    0.63
  -9  13   3    0.12    0.39
   9 -13  -3   -0.15    0.30
   9 -13  -3    0.24    0.36
 -10  13   3    0.18    0.45
  10 -13  -3   -0.46    0.28
  10 -13  -3    0.02    0.31
 -11  13   3    2.65    0.77
  11 -13  -3    4.31    0.72
  11 -13  -3    5.26    0.68
 -10 -14  -3    1.19    0.49
 -10 -14  -3    1.06    0.58
  -9 -14  -3    0.32    0.38
  -9 -14  -3    0.38    0.48
  -8 -14  -3    0.01    0.30
  -8 -14  -3    0.99    0.52
  -7 -14  -3   15.23    0.94
  -7 -14  -3   13.34    1.04
  -6 -14  -3    1.59    0.52
  -6 -14  -3    2.17    0.48
  -5 -14  -3    0.44    0.30
  -5 -14  -3   -0.01    0.30
  -4 -14  -3    1.99    0.40
  -4 -14  -3    1.33    0.43
   3  14   3    9.15    0.59
  -3 -14  -3    8.03    0.56
  -3 -14  -3   10.09    0.77
   2  14   3    5.01    0.53
  -2 -14  -3    5.13    0.63
  -2 -14  -3    5.27    0.51
   1  14   3   18.60    0.92
  -1 -14  -3   18.18    0.80
  -1 -14  -3   18.81    0.99
   0  14   3   10.03    0.70
   0 -14  -3   11.29    0.76
   0 -14  -3   10.44    0.60
  -1  14   3   32.76    1.33
   1 -14  -3   32.93    1.28
   1 -14  -3   29.60    1.04
  -2  14   3    1.11    0.41
   2 -14  -3    0.57    0.25
   2 -14  -3    0.79    0.31
  -3  14   3   12.97    0.91
   3 -14  -3   12.78    0.78
   3 -14  -3   11.84    0.65
  -4  14   3   10.80    0.87
   4 -14  -3   10.48    0.73
   4 -14  -3   10.65    0.60
  -5  14   3   -0.06    0.36
   5 -14  -3   -0.03    0.22
   5 -14  -3    0.19    0.24
  -6  14   3    0.54    0.43
   6 -14  -3    0.34    0.27
   6 -14  -3    1.53    0.41
  -7  14   3   -0.34    0.43
   7 -14  -3   -0.01    0.31
   7 -14  -3    0.24    0.29
  -8  14   3    1.78    0.60
   8 -14  -3    1.38    0.46
   8 -14  -3    1.56    0.40
  -9  14   3    1.63    0.64
   9 -14  -3    2.72    0.52
   9 -14  -3    2.68    0.56
 -10  14   3    5.38    0.96
  10 -14  -3    6.15    0.72
  10 -14  -3    6.01    0.83
  -9 -15  -3    2.59    0.57
  -9 -15  -3    2.20    0.64
  -8 -15  -3    0.88    0.50
  -8 -15  -3    0.46    0.40
  -7 -15  -3    2.17    0.63
  -7 -15  -3    2.37    0.52
  -6 -15  -3    0.43    0.38
  -6 -15  -3    0.47    0.36
  -5 -15  -3    3.91    0.67
  -5 -15  -3    3.82    0.55
  -4 -15  -3   17.22    0.90
  -4 -15  -3   17.95    1.09
  -3 -15  -3    0.89    0.31
  -3 -15  -3    1.13    0.43
   2  15   3    2.17    0.40
  -2 -15  -3    2.18    0.37
  -2 -15  -3    2.56    0.50
   1  15   3    0.29    0.28
  -1 -15  -3   -0.16    0.29
  -1 -15  -3    0.40    0.25
   0  15   3   17.15    0.96
   0 -15  -3   15.80    0.77
   0 -15  -3   18.01    0.98
  -1  15   3    6.64    0.74
   1 -15  -3    5.80    0.54
   1 -15  -3    5.50    0.61
  -2  15   3   11.95    0.90
   2 -15  -3   13.72    0.70
   2 -15  -3   12.02    0.78
  -3  15   3    0.73    0.39
   3 -15  -3    0.58    0.31
   3 -15  -3    0.78    0.28
  -4  15   3    1.12    0.45
   4 -15  -3    0.30    0.31
   4 -15  -3    0.58    0.27
  -5  15   3    0.91    0.43
   5 -15  -3    0.48    0.26
   5 -15  -3    0.82    0.36
  -6  15   3    1.01    0.48
   6 -15  -3    0.77    0.36
   6 -15  -3    0.52    0.28
  -7  15   3    8.49    1.07
   7 -15  -3    7.88    0.81
   7 -15  -3    8.33    0.73
  -8  15   3   -0.49    0.38
   8 -15  -3    0.38    0.30
   8 -15  -3   -0.09    0.30
  -9  15   3    0.34    0.52
   9 -15  -3   -0.19    0.32
   9 -15  -3   -0.20    0.29
  -9 -16  -3   -0.39    0.43
  -8 -16  -3    2.10    0.55
  -8 -16  -3    1.54    0.64
  -7 -16  -3    0.12    0.45
  -7 -16  -3    0.10    0.36
  -6 -16  -3    1.08    0.42
  -6 -16  -3    0.44    0.44
  -5 -16  -3   -0.44    0.29
  -5 -16  -3    0.68    0.46
  -4 -16  -3    2.05    0.44
  -4 -16  -3    1.71    0.53
  -3 -16  -3    0.17    0.35
  -3 -16  -3    0.16    0.27
   2  16   3    7.74    0.71
  -2 -16  -3    9.05    0.87
  -2 -16  -3    8.08    0.62
   1  16   3    8.05    0.66
  -1 -16  -3    8.56    0.62
  -1 -16  -3    7.29    0.77
   0  16   3    3.22    0.53
   0 -16  -3    2.32    0.50
   0 -16  -3    2.49    0.41
  -1  16   3    8.28    0.84
   1 -16  -3    8.35    0.60
   1 -16  -3    6.71    0.74
  -2  16   3    9.21    0.90
   2 -16  -3    8.40    0.60
   2 -16  -3    8.43    0.80
  -3  16   3   -0.22    0.29
   3 -16  -3    0.11    0.25
   3 -16  -3    0.19    0.29
  -4  16   3    0.22    0.36
   4 -16  -3   -0.28    0.27
   4 -16  -3   -0.10    0.25
  -5  16   3    0.23    0.47
   5 -16  -3   -0.08    0.26
   5 -16  -3   -0.23    0.29
  -6  16   3   11.66    1.20
   6 -16  -3   11.33    0.72
   6 -16  -3   11.85    0.86
  -7  16   3    1.95    0.68
   7 -16  -3    1.64    0.49
   7 -16  -3    2.24    0.45
  -8  16   3    2.20    0.68
   8 -16  -3    1.88    0.45
   8 -16  -3    0.93    0.45
   9 -16  -3    2.13    0.46
   9 -16  -3    2.54    0.63
  -8 -17  -3    2.73    0.60
  -7 -17  -3    0.62    0.61
  -7 -17  -3    0.51    0.44
  -6 -17  -3   -0.12    0.37
  -6 -17  -3    0.00    0.38
  -5 -17  -3   -0.31    0.36
  -5 -17  -3    0.28    0.37
  -4 -17  -3    1.30    0.48
  -4 -17  -3    1.78    0.45
  -3 -17  -3   11.83    0.78
  -3 -17  -3   11.27    1.06
  -2 -17  -3    0.26    0.28
  -2 -17  -3    0.94    0.42
   1  17   3    2.00    0.45
  -1 -17  -3    1.91    0.51
  -1 -17  -3    2.14    0.42
   0  17   3    1.86    0.48
   0 -17  -3    1.76    0.40
   0 -17  -3    2.40    0.54
  -1  17   3    3.03    0.59
   1 -17  -3    2.72    0.56
   1 -17  -3    2.90    0.45
  -2  17   3    2.80    0.60
   2 -17  -3    2.05    0.41
   2 -17  -3    3.29    0.57
  -3  17   3    3.07    0.64
   3 -17  -3    3.42    0.60
   3 -17  -3    3.20    0.46
  -4  17   3    0.45    0.46
   4 -17  -3   -0.26    0.22
   4 -17  -3    0.43    0.36
  -5  17   3    0.10    0.39
   5 -17  -3    0.41    0.36
   5 -17  -3    0.00    0.28
  -6  17   3    7.32    0.99
   6 -17  -3    7.13    0.71
   6 -17  -3    8.41    0.89
  -7  17   3    4.54    0.92
   7 -17  -3    4.08    0.67
   7 -17  -3    5.31    0.64
   8 -17  -3    0.63    0.37
   8 -17  -3    0.21    0.42
  -6 -18  -3   -0.74    0.37
  -6 -18  -3   -0.19    0.43
  -5 -18  -3    6.78    0.79
  -5 -18  -3    7.73    1.00
  -4 -18  -3    8.78    1.01
  -4 -18  -3    8.22    0.82
  -3 -18  -3    0.72    0.48
  -3 -18  -3    0.34    0.33
  -2 -18  -3    0.06    0.24
  -2 -18  -3   -0.22    0.37
  -1 -18  -3    0.40    0.41
  -1 -18  -3    1.48    0.40
   0  18   3    0.64    0.37
   0 -18  -3   -0.42    0.32
   0 -18  -3    0.10    0.28
  -1  18   3   24.56    1.33
   1 -18  -3   25.14    1.09
   1 -18  -3   25.75    1.31
  -2  18   3   -0.05    0.41
   2 -18  -3    0.29    0.36
   2 -18  -3    0.77    0.34
  -3  18   3   14.34    1.12
   3 -18  -3   15.53    0.86
   3 -18  -3   14.64    1.01
  -4  18   3    0.25    0.47
   4 -18  -3   -0.09    0.32
   4 -18  -3    0.17    0.31
  -5  18   3    0.32    0.41
   5 -18  -3    0.80    0.45
   5 -18  -3    0.18    0.30
  -6  18   3    1.63    0.63
   6 -18  -3    0.69    0.39
   6 -18  -3    0.45    0.35
  -5 -19  -3    4.38    0.67
  -5 -19  -3    4.37    0.79
  -4 -19  -3    1.98    0.60
  -4 -19  -3    2.34    0.54
  -3 -19  -3    3.50    0.57
  -3 -19  -3    3.87    0.74
  -2 -19  -3    4.59    0.75
  -2 -19  -3    5.44    0.66
  -1 -19  -3    0.76    0.48
  -1 -19  -3   -0.29    0.29
   0 -19  -3    3.22    0.66
   0 -19  -3    3.08    0.51
  -1  19   3    1.18    0.47
   1 -19  -3    0.29    0.41
   1 -19  -3    1.01    0.37
  -2  19   3    0.79    0.52
   2 -19  -3    0.23    0.37
   2 -19  -3   -0.50    0.25
  -3  19   3    1.32    0.52
   3 -19  -3    1.03    0.46
   3 -19  -3    0.76    0.36
  -4  19   3    1.01    0.49
   4 -19  -3    0.14    0.38
   4 -19  -3    0.93    0.39
  -5  19   3    6.20    0.97
   5 -19  -3    5.15    0.65
   5 -19  -3    4.35    0.72
  -2 -20  -3    4.19    0.78
  -2 -20  -3    3.26    0.57
  -1 -20  -3    0.66    0.39
  -1 -20  -3    0.64    0.48
   0 -20  -3    2.29    0.49
   0 -20  -3    2.93    0.65
   1 -20  -3    0.40    0.44
   1 -20  -3    0.45    0.37
  -2  20   3    0.88    0.52
   2 -20  -3    1.55    0.52
   2 -20  -3    0.55    0.37
   2 -20   4    0.34    0.42
   2 -20   4    0.70    0.36
   1 -20   4    1.92    0.50
   1 -20   4    1.52    0.55
   0 -20   4    0.96    0.49
   0 -20   4   -0.29    0.33
  -1 -20   4   10.29    0.92
  -1 -20   4   10.98    1.16
  -2 -20   4    1.25    0.58
  -2 -20   4    0.58    0.34
   5 -19   4    2.11    0.51
   5 -19   4    2.05    0.60
   4 -19   4    1.00    0.46
   4 -19   4    1.46    0.48
  -4  19  -4    1.64    0.54
   3 -19   4    4.56    0.63
   3 -19   4    4.04    0.69
  -3  19  -4    5.51    0.85
   2 -19   4    0.22    0.36
   2 -19   4    0.19    0.38
   1 -19   4    0.35    0.39
   1 -19   4    0.34    0.35
   0 -19   4    0.77    0.52
   0 -19   4    2.44    0.48
  -1 -19   4    6.41    0.88
  -1 -19   4    7.49    0.77
  -2 -19   4    2.21    0.64
  -2 -19   4    2.46    0.51
  -3 -19   4    0.73    0.42
  -3 -19   4    0.42    0.44
  -4 -19   4    0.64    0.45
  -4 -19   4    0.64    0.53
  -5 -19   4   -0.23    0.39
  -5 -19   4    0.22    0.50
   6 -18   4    0.03    0.35
   6 -18   4   -0.15    0.37
  -6  18  -4    0.10    0.55
   5 -18   4    0.83    0.37
   5 -18   4    1.64    0.57
  -5  18  -4    0.42    0.51
   4 -18   4   -0.14    0.32
   4 -18   4   -0.46    0.27
  -4  18  -4    0.88    0.51
   3 -18   4    1.57    0.43
   3 -18   4    0.78    0.46
  -3  18  -4    0.67    0.43
   2 -18   4    0.08    0.40
   2 -18   4   -0.27    0.31
  -2  18  -4    0.41    0.40
   1 -18   4    2.49    0.63
   1 -18   4    3.18    0.52
   0 -18   4    0.62    0.37
   0 -18   4   -0.23    0.39
  -1 -18   4   -0.46    0.39
  -1 -18   4   -0.51    0.26
  -2 -18   4    3.44    0.55
  -2 -18   4    5.65    0.79
  -3 -18   4    0.49    0.37
  -3 -18   4    0.46    0.41
  -4 -18   4    8.26    1.00
  -4 -18   4    7.92    0.80
  -5 -18   4   12.21    0.95
  -5 -18   4   11.37    1.18
  -6 -18   4    4.67    0.88
  -6 -18   4    5.00    0.72
   7 -17   4    1.98    0.47
   7 -17   4    1.34    0.55
  -7  17  -4    2.50    0.75
   6 -17   4    0.35    0.43
   6 -17   4    0.03    0.28
  -6  17  -4    0.00    0.44
   5 -17   4    0.10    0.32
   5 -17   4   -0.27    0.30
  -5  17  -4   -0.13    0.37
   4 -17   4    0.37    0.36
   4 -17   4    0.10    0.31
  -4  17  -4    0.82    0.43
   3 -17   4   14.95    1.00
   3 -17   4   15.53    0.89
  -3  17  -4   16.47    1.08
   2 -17   4    7.06    0.68
   2 -17   4    8.04    0.85
  -2  17  -4    9.29    0.92
   1 -17   4   10.49    0.99
   1 -17   4   10.82    0.74
  -1  17  -4   10.34    0.81
   0 -17   4    3.92    0.54
   0 -17   4    4.76    0.73
  -1 -17   4    1.23    0.45
  -1 -17   4    0.86    0.32
  -2 -17   4    5.20    0.60
  -2 -17   4    5.10    0.72
  -3 -17   4   19.12    1.25
  -3 -17   4   19.12    0.99
  -4 -17   4    1.37    0.56
  -4 -17   4    1.09    0.38
  -5 -17   4    7.05    0.79
  -5 -17   4    8.09    0.98
  -6 -17   4    0.59    0.57
  -6 -17   4    0.74    0.39
  -7 -17   4    0.70    0.48
  -7 -17   4    0.62    0.41
  -8 -17   4   -0.02    0.48
  -8 -17   4    0.73    0.65
   8 -16   4    3.66    0.59
   8 -16   4    2.31    0.61
  -8  16  -4    3.02    0.83
   7 -16   4   10.34    1.01
   7 -16   4    9.45    0.83
  -7  16  -4    9.07    1.16
   6 -16   4    6.60    0.69
   6 -16   4    6.09    0.78
  -6  16  -4    6.32    0.92
   5 -16   4    0.90    0.34
   5 -16   4    0.48    0.35
  -5  16  -4    1.86    0.56
   4 -16   4    2.69    0.45
   4 -16   4    2.65    0.55
  -4  16  -4    2.69    0.61
   3 -16   4    3.19    0.49
   3 -16   4    4.00    0.61
  -3  16  -4    3.72    0.65
   2 -16   4    5.80    0.61
   2 -16   4    7.14    0.78
  -2  16  -4    6.43    0.75
   1 -16   4   26.54    1.10
   1 -16   4   26.72    1.33
  -1  16  -4   29.97    1.20
  -1  16  -4   29.16    1.29
   0 -16   4    9.11    0.88
   0 -16   4   10.11    0.66
   0  16  -4    9.18    0.69
   0  16  -4    9.68    0.70
  -1 -16   4    2.26    0.41
  -1 -16   4    1.26    0.49
   1  16  -4    1.30    0.37
  -2 -16   4    1.78    0.47
  -2 -16   4    1.93    0.39
   2  16  -4    2.77    0.48
  -3 -16   4   -0.07    0.39
  -3 -16   4    0.07    0.29
   3  16  -4    0.23    0.30
  -4 -16   4    1.36    0.38
  -4 -16   4    2.07    0.52
   4  16  -4    1.58    0.43
  -5 -16   4    0.12    0.30
  -5 -16   4    0.70    0.42
   5  16  -4    0.61    0.37
  -6 -16   4   10.33    1.10
  -6 -16   4    8.45    0.84
   6  16  -4    9.41    0.86
  -7 -16   4    1.91    0.52
  -7 -16   4    0.54    0.48
  -8 -16   4    1.17    0.53
  -8 -16   4    0.57    0.48
  -9 -16   4    1.62    0.71
  -9 -16   4    2.72    0.62
   9 -15   4    0.36    0.41
   9 -15   4    0.20    0.37
  -9  15  -4    0.24    0.52
  -9  15  -4    0.00    0.30
   8 -15   4    0.11    0.41
   8 -15   4   -0.04    0.33
  -8  15  -4    1.27    0.57
  -8  15  -4    0.35    0.32
   7 -15   4   -0.13    0.27
   7 -15   4    0.38    0.35
  -7  15  -4   -0.66    0.45
   6 -15   4    5.31    0.60
   6 -15   4    5.80    0.77
  -6  15  -4    5.47    0.84
   5 -15   4    0.38    0.31
   5 -15   4    0.37    0.33
  -5  15  -4    0.46    0.44
   4 -15   4    3.56    0.57
   4 -15   4    4.22    0.53
  -4  15  -4    4.56    0.70
   3 -15   4    0.80    0.33
   3 -15   4    0.48    0.30
  -3  15  -4    1.29    0.45
  -3  15  -4    0.80    0.32
   2 -15   4    8.14    0.80
   2 -15   4    9.93    0.63
  -2  15  -4    9.14    0.85
  -2  15  -4    8.24    0.60
   1 -15   4    2.43    0.52
   1 -15   4    2.34    0.39
  -1  15  -4    1.48    0.34
  -1  15  -4    1.49    0.39
   0 -15   4    6.35    0.71
   0 -15   4    5.58    0.55
   0  15  -4    5.94    0.58
   0  15  -4    6.07    0.62
  -1 -15   4   -0.09    0.21
  -1 -15   4    0.52    0.32
   1  15  -4    0.73    0.29
   1  15  -4    0.54    0.29
  -2 -15   4    5.26    0.58
  -2 -15   4    4.51    0.64
   2  15  -4    4.44    0.54
  -3 -15   4   12.04    0.76
  -3 -15   4   14.00    0.96
   3  15  -4   12.38    0.78
  -4 -15   4   14.64    1.01
  -4 -15   4   15.79    0.89
   4  15  -4   14.26    0.86
  -5 -15   4    5.41    0.77
  -5 -15   4    4.36    0.58
   5  15  -4    4.80    0.60
  -6 -15   4   -0.13    0.34
  -6 -15   4    0.19    0.43
   6  15  -4    0.06    0.31
  -7 -15   4    1.73    0.54
  -7 -15   4    1.53    0.43
   7  15  -4    1.72    0.46
  -8 -15   4    0.20    0.44
  -8 -15   4   -0.09    0.39
   8  15  -4   -0.40    0.35
  -9 -15   4    0.62    0.44
  -9 -15   4   -0.03    0.52
   9  15  -4    0.80    0.47
  10 -14   4    1.17    0.46
  10 -14   4    0.50    0.51
 -10  14  -4    0.82    0.38
 -10  14  -4    1.13    0.61
   9 -14   4    2.85    0.63
   9 -14   4    2.34    0.50
  -9  14  -4    2.76    0.74
  -9  14  -4    2.58    0.48
   8 -14   4    3.36    0.53
   8 -14   4    3.30    0.63
  -8  14  -4    3.23    0.71
  -8  14  -4    3.81    0.52
   7 -14   4    1.85    0.41
   7 -14   4    2.61    0.58
  -7  14  -4    3.29    0.71
  -7  14  -4    3.57    0.49
   6 -14   4    0.22    0.33
   6 -14   4    0.74    0.30
  -6  14  -4    0.72    0.44
  -6  14  -4    0.48    0.31
   5 -14   4    0.68    0.34
   5 -14   4    1.11    0.33
  -5  14  -4    0.81    0.42
   4 -14   4   22.29    0.94
   4 -14   4   21.24    1.07
  -4  14  -4   18.95    1.13
   3 -14   4    1.54    0.33
   3 -14   4    2.32    0.45
  -3  14  -4    2.05    0.47
   2 -14   4   -0.01    0.28
   2 -14   4    0.06    0.24
  -2  14  -4   -0.06    0.23
  -2  14  -4   -0.48    0.28
   1 -14   4   10.05    0.77
   1 -14   4    8.79    0.58
  -1  14  -4    9.80    0.63
  -1  14  -4   10.22    0.72
   0 -14   4    1.73    0.37
   0 -14   4    1.53    0.42
   0  14  -4    1.33    0.35
   0  14  -4    1.59    0.35
  -1 -14   4   23.99    1.15
  -1 -14   4   23.19    0.96
   1  14  -4   22.16    0.94
   1  14  -4   24.33    0.99
  -2 -14   4    2.25    0.40
  -2 -14   4    1.83    0.45
   2  14  -4    2.59    0.42
   2  14  -4    1.87    0.32
  -3 -14   4    1.03    0.29
  -3 -14   4    1.50    0.48
   3  14  -4    0.85    0.29
  -4 -14   4    3.38    0.60
  -4 -14   4    3.30    0.49
   4  14  -4    3.29    0.50
  -5 -14   4    0.34    0.32
  -5 -14   4   -0.60    0.32
   5  14  -4    0.12    0.28
  -6 -14   4    0.95    0.36
  -6 -14   4    1.33    0.52
   6  14  -4    0.21    0.31
  -7 -14   4    3.92    0.70
  -7 -14   4    3.25    0.54
   7  14  -4    3.20    0.56
  -8 -14   4    4.10    0.64
  -8 -14   4    4.85    0.77
   8  14  -4    5.29    0.69
  -9 -14   4    0.77    0.51
  -9 -14   4    0.97    0.49
   9  14  -4    0.55    0.41
 -10 -14   4    0.32    0.42
 -10 -14   4    0.29    0.51
  10  14  -4    1.03    0.50
  11 -13   4    5.57    0.84
  11 -13   4    5.06    0.70
 -11  13  -4    5.51    0.98
  10 -13   4    0.38    0.40
  10 -13   4    0.09    0.35
 -10  13  -4   -0.07    0.43
 -10  13  -4    0.01    0.33
   9 -13   4    4.15    0.66
   9 -13   4    4.31    0.60
  -9  13  -4    4.54    0.57
   8 -13   4    2.34    0.43
   8 -13   4    2.04    0.52
  -8  13  -4    1.79    0.41
   7 -13   4   -0.03    0.25
   7 -13   4   -0.05    0.26
  -7  13  -4    0.26    0.28
   6 -13   4    0.99    0.40
   6 -13   4    0.41    0.27
  -6  13  -4    0.61    0.28
   5 -13   4   24.54    1.14
   5 -13   4   23.95    0.99
  -5  13  -4   24.57    1.28
  -5  13  -4   25.68    1.04
   4 -13   4   11.12    0.65
   4 -13   4   12.81    0.80
  -4  13  -4   10.80    0.87
   3 -13   4    1.45    0.39
   3 -13   4    0.87    0.27
  -3  13  -4    1.02    0.36
   2 -13   4    3.25    0.43
   2 -13   4    2.44    0.46
  -2  13  -4    2.70    0.40
  -2  13  -4    2.66    0.47
   1 -13   4    2.70    0.45
   1 -13   4    2.31    0.34
  -1  13  -4    2.62    0.45
  -1  13  -4    2.20    0.38
  -1  13  -4    2.49    0.38
   0 -13   4    2.23    0.37
   0 -13   4    2.12    0.42
   0  13  -4    1.75    0.33
   0  13  -4    1.82    0.34
   0  13  -4    2.46    0.38
  -1 -13   4    1.58    0.33
  -1 -13   4    1.36    0.40
   1  13  -4    1.45    0.31
   1  13  -4    1.80    0.35
   1  13  -4    1.70    0.35
  -2 -13   4    0.64    0.33
  -2 -13   4    1.04    0.30
   2  13  -4    0.86    0.30
   2  13  -4    1.43    0.31
   2  13  -4    0.64    0.22
  -3 -13   4    7.85    0.77
  -3 -13   4    7.87    0.58
   3  13  -4    7.33    0.59
   3  13  -4    7.06    0.65
  -4 -13   4    3.32    0.47
  -4 -13   4    2.60    0.56
   4  13  -4    2.94    0.47
  -5 -13   4    2.55    0.52
  -5 -13   4    2.78    0.46
   5  13  -4    2.47    0.46
  -6 -13   4   -0.06    0.29
  -6 -13   4    0.17    0.34
   6  13  -4    0.11    0.31
  -7 -13   4    9.00    0.80
  -7 -13   4    8.82    0.96
   7  13  -4   10.16    0.88
  -8 -13   4   -0.44    0.31
  -8 -13   4    0.15    0.38
   8  13  -4   -0.09    0.33
  -9 -13   4    1.21    0.54
  -9 -13   4    1.64    0.53
   9  13  -4    2.37    0.56
 -10 -13   4    1.26    0.46
 -10 -13   4    1.41    0.60
  10  13  -4    0.72    0.39
 -11 -13   4    3.97    0.82
 -11 -13   4    3.97    0.70
  11  13  -4    4.22    0.73
  11 -12   4    2.41    0.59
  11 -12   4    1.53    0.47
 -11  12  -4    1.96    0.47
  10 -12   4   11.74    0.87
  10 -12   4   13.60    1.03
 -10  12  -4   12.19    0.81
   9 -12   4    3.06    0.61
   9 -12   4    3.47    0.50
  -9  12  -4    2.11    0.43
   8 -12   4    1.41    0.42
   8 -12   4    0.76    0.35
  -8  12  -4    1.18    0.36
   7 -12   4    5.68    0.59
   7 -12   4    5.58    0.67
  -7  12  -4    6.01    0.60
   6 -12   4    0.76    0.37
   6 -12   4    0.05    0.27
  -6  12  -4    0.31    0.29
   5 -12   4    2.82    0.50
   5 -12   4    3.50    0.43
  -5  12  -4    3.11    0.44
   4 -12   4   11.01    0.71
   4 -12   4   11.27    0.62
  -4  12  -4    9.67    0.65
  -4  12  -4   10.15    0.62
   3 -12   4    4.48    0.46
   3 -12   4    5.27    0.56
  -3  12  -4    5.04    0.62
  -3  12  -4    4.29    0.46
   2 -12   4    1.54    0.35
   2 -12   4    0.77    0.26
  -2  12  -4    0.66    0.25
  -2  12  -4    0.82    0.32
   1 -12   4    1.09    0.26
   1 -12   4    0.48    0.30
  -1  12  -4    1.34    0.33
  -1  12  -4    0.66    0.26
  -1  12  -4    0.42    0.24
   0 -12   4    8.13    0.53
   0 -12   4    8.57    0.66
   0  12  -4    7.43    0.53
   0  12  -4    7.56    0.51
   0  12  -4    6.92    0.51
  -1 -12   4    3.14    0.39
  -1 -12   4    2.66    0.44
   1  12  -4    3.75    0.41
   1  12  -4    2.87    0.41
   1  12  -4    3.49    0.43
  -2 -12   4   -0.06    0.24
  -2 -12   4    0.46    0.25
   2  12  -4    0.41    0.22
   2  12  -4   -0.01    0.23
   2  12  -4    0.34    0.17
  -3 -12   4   33.34    1.14
  -3 -12   4   35.39    1.39
   3  12  -4   33.94    0.97
   3  12  -4   33.05    1.19
  -4 -12   4   81.48    2.21
  -4 -12   4   85.40    2.51
   4  12  -4   87.36    2.29
  -5 -12   4    8.82    0.83
  -5 -12   4    9.46    0.65
   5  12  -4   10.27    0.71
  -6 -12   4   -0.18    0.22
  -6 -12   4   -0.06    0.28
   6  12  -4    0.04    0.24
  -7 -12   4    2.62    0.47
  -7 -12   4    2.94    0.56
   7  12  -4    2.52    0.49
  -8 -12   4   -0.04    0.31
  -8 -12   4   -0.28    0.26
   8  12  -4   -0.25    0.27
  -9 -12   4    0.80    0.39
  -9 -12   4    0.37    0.37
   9  12  -4    0.57    0.40
 -10 -12   4   13.38    1.25
 -10 -12   4   10.75    1.01
  10  12  -4   11.63    0.89
 -11 -12   4    6.43    0.85
 -11 -12   4    8.16    1.06
  11  12  -4    8.47    0.93
  12 -11   4    0.65    0.41
  12 -11   4    0.65    0.42
 -12  11  -4   -0.47    0.35
  11 -11   4    1.73    0.52
  11 -11   4    0.87    0.38
 -11  11  -4    2.01    0.47
  10 -11   4    6.09    0.77
  10 -11   4    6.86    0.73
 -10  11  -4    7.51    0.72
   9 -11   4    0.20    0.32
   9 -11   4    0.24    0.32
  -9  11  -4    0.65    0.31
   8 -11   4    4.14    0.60
   8 -11   4    3.19    0.45
  -8  11  -4    3.16    0.47
   7 -11   4    0.80    0.33
   7 -11   4    0.26    0.29
  -7  11  -4   -0.09    0.22
   6 -11   4    0.34    0.31
   6 -11   4   -0.33    0.22
  -6  11  -4    0.18    0.26
  -6  11  -4    0.00    0.26
   5 -11   4    0.40    0.23
   5 -11   4    0.21    0.25
  -5  11  -4    0.15    0.25
  -5  11  -4   -0.04    0.20
   4 -11   4   17.89    0.88
   4 -11   4   19.69    0.81
  -4  11  -4   18.77    0.82
  -4  11  -4   18.56    0.86
   3 -11   4   29.49    0.99
   3 -11   4   29.35    1.13
  -3  11  -4   29.03    1.04
  -3  11  -4   27.77    1.02
   2 -11   4    1.63    0.33
   2 -11   4    2.08    0.31
  -2  11  -4    2.21    0.38
  -2  11  -4    2.27    0.33
   1 -11   4    3.69    0.36
   1 -11   4    3.47    0.46
  -1  11  -4    3.58    0.44
  -1  11  -4    3.18    0.38
   0 -11   4    3.00    0.42
   0 -11   4    3.66    0.39
   0  11  -4    3.58    0.40
   0  11  -4    3.99    0.43
   0  11  -4    2.94    0.39
  -1 -11   4    4.21    0.49
  -1 -11   4    4.06    0.38
   1  11  -4    4.31    0.44
   1  11  -4    4.62    0.38
   1  11  -4    4.46    0.43
  -2 -11   4    9.78    0.68
  -2 -11   4   11.71    0.58
   2  11  -4   10.51    0.60
   2  11  -4   11.43    0.64
   2  11  -4   10.89    0.51
  -3 -11   4   -0.19    0.23
  -3 -11   4    0.08    0.18
   3  11  -4    0.03    0.13
   3  11  -4   -0.46    0.20
  -4 -11   4   28.10    1.21
  -4 -11   4   27.28    1.04
   4  11  -4   28.26    1.08
  -5 -11   4   20.06    0.91
  -5 -11   4   18.17    1.02
   5  11  -4   18.87    0.91
  -6 -11   4    0.99    0.35
  -6 -11   4    0.41    0.40
   6  11  -4    0.31    0.27
  -7 -11   4    4.33    0.57
  -7 -11   4    3.70    0.59
   7  11  -4    4.28    0.59
  -8 -11   4    1.50    0.45
  -8 -11   4    1.87    0.44
   8  11  -4    1.43    0.44
  -9 -11   4    9.67    0.87
  -9 -11   4    8.72    0.94
   9  11  -4    7.89    0.82
 -10 -11   4    1.44    0.58
 -10 -11   4    2.03    0.55
  10  11  -4    2.04    0.53
 -11 -11   4    2.04    0.52
 -11 -11   4    0.72    0.50
  11  11  -4    1.18    0.47
 -12 -11   4    1.15    0.66
 -12 -11   4    1.25    0.56
  12  11  -4    0.93    0.50
  12 -10   4    1.78    0.51
  12 -10   4    1.01    0.50
 -12  10  -4    0.59    0.39
  11 -10   4    1.40    0.53
  11 -10   4    1.66    0.44
 -11  10  -4    1.24    0.40
  10 -10   4    0.14    0.28
  10 -10   4   -0.52    0.28
 -10  10  -4    0.08    0.30
 -10  10  -4    0.27    0.31
   9 -10   4   -0.07    0.23
   9 -10   4    0.10    0.34
  -9  10  -4    0.05    0.28
   8 -10   4    0.78    0.33
   8 -10   4    0.53    0.28
  -8  10  -4    1.04    0.34
   7 -10   4    0.78    0.37
   7 -10   4    1.44    0.34
  -7  10  -4    1.29    0.34
  -7  10  -4    0.79    0.36
   6 -10   4   49.50    1.52
   6 -10   4   53.04    1.73
  -6  10  -4   51.82    1.56
  -6  10  -4   55.13    1.74
   5 -10   4    1.99    0.36
   5 -10   4    1.92    0.31
  -5  10  -4    2.30    0.36
  -5  10  -4    2.46    0.40
   4 -10   4    2.99    0.37
   4 -10   4    2.91    0.43
  -4  10  -4    3.93    0.44
  -4  10  -4    3.17    0.39
   3 -10   4    5.04    0.52
   3 -10   4    4.93    0.38
  -3  10  -4    5.39    0.48
  -3  10  -4    5.16    0.48
   2 -10   4    7.76    0.53
   2 -10   4    6.99    0.42
  -2  10  -4    6.73    0.46
  -2  10  -4    6.68    0.48
   1 -10   4   17.21    0.80
   1 -10   4   17.14    0.68
  -1  10  -4   17.80    0.80
  -1  10  -4   19.09    0.76
   0 -10   4    2.41    0.36
   0 -10   4    2.18    0.29
   0  10  -4    2.31    0.32
   0  10  -4    2.08    0.32
   0  10  -4    2.62    0.34
  -1 -10   4   66.61    1.69
  -1 -10   4   69.93    1.95
   1  10  -4   69.68    1.75
   1  10  -4   67.83    1.82
   1  10  -4   67.47    1.75
  -2 -10   4    0.61    0.20
  -2 -10   4    0.67    0.24
   2  10  -4    0.66    0.22
   2  10  -4    0.55    0.16
  -3 -10   4    3.25    0.45
  -3 -10   4    2.65    0.34
   3  10  -4    2.86    0.37
   3  10  -4    2.86    0.22
  -4 -10   4   23.71    0.91
  -4 -10   4   23.15    1.04
   4  10  -4   22.81    0.95
  -5 -10   4    2.89    0.47
  -5 -10   4    2.40    0.37
   5  10  -4    2.63    0.42
  -6 -10   4   15.12    0.90
  -6 -10   4   14.54    0.79
   6  10  -4   15.56    0.82
  -7 -10   4    1.25    0.41
  -7 -10   4    0.88    0.32
   7  10  -4    1.06    0.35
  -8 -10   4    0.05    0.33
  -8 -10   4   -0.20    0.25
   8  10  -4    0.17    0.28
  -9 -10   4    4.95    0.70
  -9 -10   4    4.25    0.63
   9  10  -4    3.14    0.57
 -10 -10   4    0.97    0.39
 -10 -10   4    1.37    0.54
  10  10  -4    0.94    0.43
 -11 -10   4    0.73    0.45
 -11 -10   4    0.74    0.42
  11  10  -4   -0.09    0.33
 -12 -10   4   -0.14    0.43
 -12 -10   4    1.03    0.54
  12  10  -4    1.10    0.49
  12  -9   4    1.23    0.44
  12  -9   4    1.44    0.48
 -12   9  -4    1.64    0.46
  11  -9   4    0.03    0.30
  11  -9   4    0.05    0.31
 -11   9  -4    0.20    0.34
 -11   9  -4   -0.14    0.29
  10  -9   4    2.92    0.49
  10  -9   4    2.66    0.56
 -10   9  -4    2.60    0.48
 -10   9  -4    2.75    0.46
   9  -9   4   10.09    0.78
   9  -9   4   11.02    0.75
  -9   9  -4   10.46    0.71
  -9   9  -4    9.52    0.69
   8  -9   4   72.52    2.23
   8  -9   4   73.46    2.03
  -8   9  -4   70.24    2.00
  -8   9  -4   70.22    2.23
  -8   9  -4   73.28    2.04
   7  -9   4    0.95    0.33
   7  -9   4    1.14    0.33
  -7   9  -4    1.21    0.32
  -7   9  -4    1.36    0.41
   6  -9   4    2.07    0.40
   6  -9   4    2.28    0.35
  -6   9  -4    1.97    0.34
  -6   9  -4    1.93    0.39
   5  -9   4   -0.04    0.16
   5  -9   4   -0.03    0.18
  -5   9  -4    0.39    0.23
  -5   9  -4    0.18    0.19
   4  -9   4   -0.28    0.15
   4  -9   4   -0.08    0.16
  -4   9  -4    0.13    0.18
  -4   9  -4   -0.05    0.20
   3  -9   4   35.04    1.03
   3  -9   4   33.60    1.15
  -3   9  -4   33.28    1.09
  -3   9  -4   33.49    1.09
   2  -9   4    1.75    0.26
   2  -9   4    1.17    0.26
  -2   9  -4    1.82    0.29
  -2   9  -4    1.82    0.28
   1  -9   4   19.37    0.69
   1  -9   4   19.89    0.85
  -1   9  -4   20.31    0.77
   0  -9   4    5.80    0.47
   0  -9   4    5.68    0.36
   0   9  -4    6.67    0.44
   0   9  -4    5.92    0.41
   0   9  -4    6.03    0.41
  -1  -9   4    0.81    0.20
  -1  -9   4    0.20    0.21
   1   9  -4    0.05    0.17
   1   9  -4    0.30    0.16
   1   9  -4    0.26    0.20
  -2  -9   4   31.68    1.14
  -2  -9   4   32.30    0.99
   2   9  -4   32.62    0.90
   2   9  -4   31.40    1.01
  -3  -9   4    0.39    0.27
  -3  -9   4    0.31    0.18
   3   9  -4    0.39    0.11
   3   9  -4    0.57    0.20
  -4  -9   4  136.57    3.10
  -4  -9   4  138.53    3.38
   4   9  -4  140.82    3.18
  -5  -9   4    3.28    0.41
  -5  -9   4    2.92    0.44
   5   9  -4    3.54    0.44
  -6  -9   4   19.37    0.88
  -6  -9   4   20.17    1.00
   6   9  -4   18.93    0.89
  -7  -9   4    0.69    0.38
  -7  -9   4   -0.14    0.22
   7   9  -4    0.42    0.26
  -8  -9   4    1.87    0.50
  -8  -9   4    1.45    0.38
   8   9  -4    1.28    0.39
  -9  -9   4    0.34    0.36
  -9  -9   4    0.46    0.41
   9   9  -4    0.61    0.40
 -10  -9   4    0.88    0.38
 -10  -9   4    1.07    0.44
  10   9  -4    1.42    0.48
 -11  -9   4    0.47    0.36
 -11  -9   4   -0.21    0.34
  11   9  -4    0.26    0.36
 -12  -9   4    1.07    0.57
 -12  -9   4    1.53    0.53
  12   9  -4    0.38    0.42
 -13  -9   4    1.61    0.57
  13   9  -4    0.08    0.40
  13  -8   4    0.46    0.36
 -13   8  -4    1.11    0.42
  12  -8   4    1.25    0.52
  12  -8   4    0.64    0.41
 -12   8  -4    1.74    0.46
 -12   8  -4    0.98    0.42
  11  -8   4    0.08    0.30
  11  -8   4    0.14    0.28
 -11   8  -4    0.42    0.34
 -11   8  -4    0.05    0.33
  10  -8   4    2.23    0.51
  10  -8   4    1.71    0.43
 -10   8  -4    1.31    0.38
 -10   8  -4    2.38    0.42
   9  -8   4    4.71    0.54
   9  -8   4    4.98    0.62
  -9   8  -4    6.16    0.59
  -9   8  -4    6.01    0.72
[truncated: 1,966,562 more chars]
