# Supplementary material
Source: MDPI journal article supplement (https://www.mdpi.com/2304-6740/5/2/26)
Supplement: s1 [file s1 › [K(DFForm)].cif]

data_p1
_audit_creation_date              2017-02-12
_audit_creation_method
;
Olex2 1.2
(compiled 2017.01.04 svn.r3372 for OlexSys, GUI svn.r5292)
;
_publ_contact_author_address      ?
_publ_contact_author_email        ?
_publ_contact_author_id_orcid     ?
_publ_contact_author_name         ''
_publ_contact_author_phone        ?
_publ_section_references
;
Dolomanov, O.V., Bourhis, L.J., Gildea, R.J, Howard, J.A.K. & Puschmann, H.
 (2009), J. Appl. Cryst. 42, 339-341.

Palatinus, L. & Chapuis, G. (2007). J. Appl. Cryst., 40, 786-790;
Palatinus, L. & van der Lee, A. (2008). J. Appl. Cryst. 41, 975-984;
Palatinus, L., Prathapa, S. J. & van Smaalen, S. (2012). J. Appl. Cryst. 45,
 575-580.

Sheldrick, G.M. (2008). Acta Cryst. A64, 112-122.
;
_chemical_name_common             ?
_chemical_name_systematic
;
 ? 
;
_chemical_formula_moiety          'C13 H7 F4 K N2'
_chemical_formula_sum             'C13 H7 F4 K N2'
_chemical_formula_weight          306.31
_chemical_melting_point           ?
loop_
  _atom_type_symbol
  _atom_type_description
  _atom_type_scat_dispersion_real
  _atom_type_scat_dispersion_imag
  _atom_type_scat_source
 'C' 'C' 0.0033 0.0016 'International Tables Vol C Tables 4.2.6.8 and 6.1.1.4'
 'H' 'H' 0.0000 0.0000 'International Tables Vol C Tables 4.2.6.8 and 6.1.1.4'
 'F' 'F' 0.0171 0.0103 'International Tables Vol C Tables 4.2.6.8 and 6.1.1.4'
 'K' 'K' 0.2009 0.2494 'International Tables Vol C Tables 4.2.6.8 and 6.1.1.4'
 'N' 'N' 0.0061 0.0033 'International Tables Vol C Tables 4.2.6.8 and 6.1.1.4'

_space_group_crystal_system       'triclinic'
_space_group_IT_number            2
_space_group_name_H-M_alt         'P -1'
_space_group_name_Hall            '-P 1'
loop_
  _space_group_symop_id
  _space_group_symop_operation_xyz
 1 'x, y, z'
 2 '-x, -y, -z'

_cell_length_a                    7.4437(2)
_cell_length_b                    7.5357(2)
_cell_length_c                    11.8891(3)
_cell_angle_alpha                 100.6590(10)
_cell_angle_beta                  101.9020(10)
_cell_angle_gamma                 101.1070(10)
_cell_volume                      622.56(3)
_cell_formula_units_Z             2
_cell_measurement_reflns_used     6315
_cell_measurement_temperature     100(2)
_cell_measurement_theta_max       30.179
_cell_measurement_theta_min       4.010
_exptl_absorpt_coefficient_mu     0.466
_exptl_absorpt_correction_T_max   0.7460
_exptl_absorpt_correction_T_min   0.6956
_exptl_absorpt_correction_type    multi-scan
_exptl_absorpt_process_details
'SADABS-2014/5 (Bruker,2014/5) was used for absorption correction. wR2(int) was 0.0329 before and 0.0249 after correction. The Ratio of minimum to maximum transmission is 0.9324. The \l/2 correction factor is 0.00150.'
_exptl_crystal_colour             'clear colourless'
_exptl_crystal_colour_lustre      clear
_exptl_crystal_colour_primary     colourless
_exptl_crystal_density_diffrn     1.634
_exptl_crystal_density_meas       ?
_exptl_crystal_density_method     'not measured'
_exptl_crystal_description        block
_exptl_crystal_F_000              308
_exptl_crystal_size_max           0.3
_exptl_crystal_size_mid           0.3
_exptl_crystal_size_min           0.2
_exptl_special_details
;
 ? 
;
_diffrn_reflns_av_R_equivalents   0.0152
_diffrn_reflns_av_unetI/netI      0.0174
_diffrn_reflns_limit_h_max        10
_diffrn_reflns_limit_h_min        -10
_diffrn_reflns_limit_k_max        10
_diffrn_reflns_limit_k_min        -10
_diffrn_reflns_limit_l_max        16
_diffrn_reflns_limit_l_min        -16
_diffrn_reflns_number             10877
_diffrn_reflns_theta_full         30.24
_diffrn_reflns_theta_max          30.24
_diffrn_reflns_theta_min          2.83
_diffrn_ambient_temperature       100(2)
_diffrn_detector_area_resol_mean  ?
_diffrn_measured_fraction_theta_full 0.982
_diffrn_measured_fraction_theta_max 0.982
_diffrn_measurement_device_type   'Bruker APEX-II CCD'
_diffrn_measurement_method        '\f and \w scans'
_diffrn_radiation_monochromator   graphite
_diffrn_radiation_type            MoK\a
_diffrn_radiation_wavelength      0.71073
_diffrn_source                    'fine-focus sealed tube'
_diffrn_standards_number          0
_reflns_number_gt                 3277
_reflns_number_total              3657
_reflns_threshold_expression      >2sigma(I)
_computing_cell_refinement        'SAINT v8.34A (Bruker, 2013)'
_computing_data_collection        ?
_computing_data_reduction         'SAINT v8.34A (Bruker, 2013)'
_computing_molecular_graphics     'Olex2 (Dolomanov et al., 2009)'
_computing_publication_material   'Olex2 (Dolomanov et al., 2009)'
_computing_structure_refinement   'XL (Sheldrick, 2008)'
_computing_structure_solution
;
Superflip (Palatinus & Chapuis, 2007;Palatinus & van der Lee, 2008;
Palatinus et al., 2012)
;
_refine_diff_density_max          0.463
_refine_diff_density_min          -0.292
_refine_diff_density_rms          0.054
_refine_ls_extinction_coef        ?
_refine_ls_extinction_method      none
_refine_ls_goodness_of_fit_ref    1.041
_refine_ls_hydrogen_treatment     mixed
_refine_ls_matrix_type            full
_refine_ls_number_parameters      185
_refine_ls_number_reflns          3657
_refine_ls_number_restraints      0
_refine_ls_R_factor_all           0.0329
_refine_ls_R_factor_gt            0.0279
_refine_ls_restrained_S_all       1.041
_refine_ls_shift/su_max           0.001
_refine_ls_shift/su_mean          0.000
_refine_ls_structure_factor_coef  Fsqd
_refine_ls_weighting_details
'calc w=1/[\s^2^(Fo^2^)+(0.0351P)^2^+0.2834P] where P=(Fo^2^+2Fc^2^)/3'
_refine_ls_weighting_scheme       calc
_refine_ls_wR_factor_gt           0.0708
_refine_ls_wR_factor_ref          0.0734
_refine_special_details           'NCHN H atom manually assigned.'
_olex2_refinement_description
;
1. Fixed Uiso
 At 1.2 times of:
  All C(H) groups
2.a Aromatic/amide H refined with riding coordinates:
 C12(H12), C10(H10), C4(H4), C11(H11), C2(H2), C3(H3)
;
_atom_sites_solution_hydrogens    geom
_atom_sites_solution_primary      iterative
_atom_sites_solution_secondary    difmap
_atom_sites_special_details
;
The structure was solved using Direct Methods (ShelXS). RE = 0.2, Nqual =  -1, Ralpha = 0.078
;
loop_
  _atom_site_label
  _atom_site_type_symbol
  _atom_site_fract_x
  _atom_site_fract_y
  _atom_site_fract_z
  _atom_site_U_iso_or_equiv
  _atom_site_adp_type
  _atom_site_occupancy
  _atom_site_calc_flag
  _atom_site_disorder_assembly
  _atom_site_disorder_group
  _atom_site_refinement_flags_posn
 K1 K 0.35910(3) -0.15331(3) 0.05814(2) 0.01438(7) Uani 1 d . . .
 F4 F 0.17661(10) 0.49089(9) -0.06608(6) 0.01929(15) Uani 1 d . . .
 F3 F 0.01159(10) -0.16547(9) -0.18042(6) 0.02036(15) Uani 1 d . . .
 F2 F 0.52011(10) 0.63050(9) 0.18684(7) 0.02133(15) Uani 1 d . . .
 F1 F 0.64034(11) 0.10344(10) 0.32018(7) 0.02625(17) Uani 1 d . . .
 N2 N 0.25763(13) 0.13935(12) -0.03534(8) 0.01395(17) Uani 1 d . . .
 N1 N 0.48281(13) 0.23534(12) 0.13776(8) 0.01425(17) Uani 1 d . . .
 C7 C 0.32970(15) 0.25819(14) 0.06906(9) 0.01334(19) Uani 1 d . . .
 C8 C 0.10388(15) 0.16082(14) -0.11386(9) 0.01265(19) Uani 1 d . . .
 C13 C 0.05966(15) 0.32721(14) -0.13460(9) 0.01412(19) Uani 1 d . . .
 C9 C -0.02215(16) 0.00166(14) -0.19262(10) 0.0148(2) Uani 1 d . . .
 C6 C 0.56667(15) 0.35717(14) 0.24690(9) 0.01390(19) Uani 1 d . . .
 C5 C 0.59141(16) 0.55080(15) 0.27474(10) 0.0164(2) Uani 1 d . . .
 C12 C -0.08959(16) 0.33796(15) -0.22156(10) 0.0167(2) Uani 1 d . . .
 H12 H -0.1097 0.4553 -0.2317 0.020 Uiso 1 calc . . R
 C10 C -0.17545(16) 0.00354(16) -0.27930(10) 0.0178(2) Uani 1 d . . .
 H10 H -0.2563 -0.1096 -0.3282 0.021 Uiso 1 calc . . R
 C4 C 0.69039(18) 0.66733(17) 0.38267(12) 0.0237(2) Uani 1 d . . .
 H4 H 0.7024 0.7978 0.3959 0.028 Uiso 1 calc . . R
 C1 C 0.65485(16) 0.29003(16) 0.34060(10) 0.0182(2) Uani 1 d . . .
 C11 C -0.21038(16) 0.17385(16) -0.29428(10) 0.0183(2) Uani 1 d . . .
 H11 H -0.3157 0.1780 -0.3536 0.022 Uiso 1 calc . . R
 C2 C 0.75425(18) 0.39900(19) 0.45014(11) 0.0241(2) Uani 1 d . . .
 H2 H 0.8100 0.3447 0.5103 0.029 Uiso 1 calc . . R
 C3 C 0.77174(19) 0.58997(19) 0.47127(11) 0.0269(3) Uani 1 d . . .
 H3 H 0.8395 0.6674 0.5465 0.032 Uiso 1 calc . . R
 H7 H 0.265(2) 0.3542(19) 0.0973(12) 0.013(3) Uiso 1 d . . .

loop_
  _atom_site_aniso_label
  _atom_site_aniso_U_11
  _atom_site_aniso_U_22
  _atom_site_aniso_U_33
  _atom_site_aniso_U_23
  _atom_site_aniso_U_13
  _atom_site_aniso_U_12
 K1 0.01627(11) 0.01080(10) 0.01844(11) 0.00519(7) 0.00687(8) 0.00439(8)
 F4 0.0209(3) 0.0103(3) 0.0236(3) 0.0027(2) 0.0014(3) 0.0022(2)
 F3 0.0219(3) 0.0103(3) 0.0285(4) 0.0030(2) 0.0062(3) 0.0046(2)
 F2 0.0233(4) 0.0149(3) 0.0269(4) 0.0087(3) 0.0025(3) 0.0074(3)
 F1 0.0269(4) 0.0179(3) 0.0337(4) 0.0139(3) -0.0001(3) 0.0055(3)
 N2 0.0138(4) 0.0128(4) 0.0162(4) 0.0044(3) 0.0036(3) 0.0047(3)
 N1 0.0147(4) 0.0120(4) 0.0165(4) 0.0040(3) 0.0031(3) 0.0044(3)
 C7 0.0138(5) 0.0115(4) 0.0173(5) 0.0056(4) 0.0066(4) 0.0042(3)
 C8 0.0124(4) 0.0124(4) 0.0149(4) 0.0043(3) 0.0056(4) 0.0037(3)
 C13 0.0147(5) 0.0113(4) 0.0168(5) 0.0029(3) 0.0054(4) 0.0029(4)
 C9 0.0161(5) 0.0116(4) 0.0182(5) 0.0034(4) 0.0072(4) 0.0042(4)
 C6 0.0130(5) 0.0143(4) 0.0160(5) 0.0049(4) 0.0050(4) 0.0042(4)
 C5 0.0157(5) 0.0157(5) 0.0194(5) 0.0049(4) 0.0049(4) 0.0064(4)
 C12 0.0179(5) 0.0176(5) 0.0181(5) 0.0077(4) 0.0062(4) 0.0078(4)
 C10 0.0156(5) 0.0188(5) 0.0166(5) 0.0004(4) 0.0048(4) 0.0016(4)
 C4 0.0214(6) 0.0190(5) 0.0273(6) -0.0030(4) 0.0037(5) 0.0070(4)
 C1 0.0170(5) 0.0181(5) 0.0215(5) 0.0083(4) 0.0048(4) 0.0050(4)
 C11 0.0157(5) 0.0245(5) 0.0155(5) 0.0059(4) 0.0036(4) 0.0060(4)
 C2 0.0216(6) 0.0336(6) 0.0175(5) 0.0090(5) 0.0020(4) 0.0080(5)
 C3 0.0228(6) 0.0330(7) 0.0195(5) -0.0039(5) 0.0012(5) 0.0081(5)

_geom_special_details
;
 All esds (except the esd in the dihedral angle between two l.s. planes) 
 are estimated using the full covariance matrix.  The cell esds are taken 
 into account individually in the estimation of esds in distances, angles 
 and torsion angles; correlations between esds in cell parameters are only 
 used when they are defined by crystal symmetry.  An approximate (isotropic) 
 treatment of cell esds is used for estimating esds involving l.s. planes. 
;
loop_
  _geom_bond_atom_site_label_1
  _geom_bond_atom_site_label_2
  _geom_bond_distance
  _geom_bond_site_symmetry_2
  _geom_bond_publ_flag
 K1 F4 2.7422(7) 1_545 ?
 K1 F3 3.3957(8) . ?
 K1 F2 2.7110(7) 1_545 ?
 K1 F1 3.3692(8) . ?
 K1 N2 2.8057(10) . ?
 K1 N2 2.9048(9) 2_655 ?
 K1 N1 2.8102(9) . ?
 K1 N1 2.8407(9) 2_655 ?
 K1 C7 3.1601(10) 2_655 ?
 K1 C12 3.3568(11) 2 ?
 K1 C10 3.3220(11) 2 ?
 K1 C11 3.2417(11) 2 ?
 F4 K1 2.7422(7) 1_565 ?
 F4 C13 1.3656(12) . ?
 F3 C9 1.3581(12) . ?
 F2 K1 2.7110(7) 1_565 ?
 F2 C5 1.3641(14) . ?
 F1 C1 1.3609(13) . ?
 N2 K1 2.9047(9) 2_655 ?
 N2 C7 1.3265(13) . ?
 N2 C8 1.3762(14) . ?
 N1 K1 2.8407(9) 2_655 ?
 N1 C7 1.3189(14) . ?
 N1 C6 1.3858(13) . ?
 C7 K1 3.1600(10) 2_655 ?
 C8 C13 1.4075(15) . ?
 C8 C9 1.4086(14) . ?
 C13 K1 3.5066(11) 2 ?
 C13 C12 1.3790(16) . ?
 C9 K1 3.4980(10) 2 ?
 C9 C10 1.3751(16) . ?
 C6 C5 1.4019(14) . ?
 C6 C1 1.4010(16) . ?
 C5 C4 1.3800(16) . ?
 C12 K1 3.3569(11) 2 ?
 C12 C11 1.3931(15) . ?
 C10 K1 3.3221(11) 2 ?
 C10 C11 1.3930(17) . ?
 C4 C3 1.384(2) . ?
 C1 C2 1.3750(17) . ?
 C11 K1 3.2418(11) 2 ?
 C2 C3 1.3898(19) . ?

loop_
  _geom_angle_atom_site_label_1
  _geom_angle_atom_site_label_2
  _geom_angle_atom_site_label_3
  _geom_angle
  _geom_angle_site_symmetry_1
  _geom_angle_site_symmetry_3
  _geom_angle_publ_flag
 F4 K1 F3 67.429(19) 1_545 . ?
 F4 K1 F1 143.86(2) 1_545 . ?
 F4 K1 N2 117.47(3) 1_545 . ?
 F4 K1 N2 101.36(2) 1_545 2_655 ?
 F4 K1 N1 165.02(3) 1_545 . ?
 F4 K1 N1 72.62(2) 1_545 2_655 ?
 F4 K1 C7 79.96(2) 1_545 2_655 ?
 F4 K1 C12 72.92(2) 1_545 2 ?
 F4 K1 C10 112.80(3) 1_545 2 ?
 F4 K1 C11 96.72(3) 1_545 2 ?
 F2 K1 F4 76.14(2) 1_545 1_545 ?
 F2 K1 F3 143.42(2) 1_545 . ?
 F2 K1 F1 68.86(2) 1_545 . ?
 F2 K1 N2 166.33(3) 1_545 . ?
 F2 K1 N2 69.49(2) 1_545 2_655 ?
 F2 K1 N1 97.14(3) 1_545 2_655 ?
 F2 K1 N1 118.84(3) 1_545 . ?
 F2 K1 C7 76.02(3) 1_545 2_655 ?
 F2 K1 C12 66.29(3) 1_545 2 ?
 F2 K1 C10 89.29(3) 1_545 2 ?
 F2 K1 C11 66.85(3) 1_545 2 ?
 F1 K1 F3 145.897(18) . . ?
 N2 K1 F3 120.08(2) 2_655 . ?
 N2 K1 F3 50.24(2) . . ?
 N2 K1 F1 97.86(2) . . ?
 N2 K1 F1 74.92(2) 2_655 . ?
 N2 K1 N2 104.75(2) . 2_655 ?
 N2 K1 N1 47.56(3) . . ?
 N2 K1 N1 86.57(3) . 2_655 ?
 N2 K1 C7 24.81(3) 2_655 2_655 ?
 N2 K1 C7 104.11(3) . 2_655 ?
 N2 K1 C12 117.16(3) . 2 ?
 N2 K1 C12 135.49(3) 2_655 2 ?
 N2 K1 C10 134.01(3) 2_655 2 ?
 N2 K1 C10 86.31(3) . 2 ?
 N2 K1 C11 126.52(3) 2_655 2 ?
 N2 K1 C11 110.40(3) . 2 ?
 N1 K1 F3 75.51(2) 2_655 . ?
 N1 K1 F3 97.61(2) . . ?
 N1 K1 F1 50.73(2) . . ?
 N1 K1 F1 119.68(2) 2_655 . ?
 N1 K1 N2 46.41(3) 2_655 2_655 ?
 N1 K1 N2 85.27(3) . 2_655 ?
 N1 K1 N1 103.79(2) . 2_655 ?
 N1 K1 C7 102.93(3) . 2_655 ?
 N1 K1 C7 24.66(3) 2_655 2_655 ?
 N1 K1 C12 111.72(3) . 2 ?
 N1 K1 C12 144.49(3) 2_655 2 ?
 N1 K1 C10 172.54(3) 2_655 2 ?
 N1 K1 C10 69.61(3) . 2 ?
 N1 K1 C11 162.90(3) 2_655 2 ?
 N1 K1 C11 89.83(3) . 2 ?
 C7 K1 F3 100.07(2) 2_655 . ?
 C7 K1 F1 99.59(2) 2_655 . ?
 C7 K1 C12 137.57(3) 2_655 2 ?
 C7 K1 C10 157.94(3) 2_655 2 ?
 C7 K1 C11 142.31(3) 2_655 2 ?
 C12 K1 F3 98.86(2) 2 . ?
 C12 K1 F1 84.79(2) 2 . ?
 C10 K1 F3 101.49(2) 2 . ?
 C10 K1 F1 59.27(2) 2 . ?
 C10 K1 C12 42.23(3) 2 2 ?
 C11 K1 F3 113.36(2) 2 . ?
 C11 K1 F1 61.64(3) 2 . ?
 C11 K1 C12 24.30(3) 2 2 ?
 C11 K1 C10 24.47(3) 2 2 ?
 C13 F4 K1 169.84(7) . 1_565 ?
 C9 F3 K1 115.74(6) . . ?
 C5 F2 K1 165.35(6) . 1_565 ?
 C1 F1 K1 116.20(7) . . ?
 K1 N2 K1 75.25(2) . 2_655 ?
 C7 N2 K1 88.43(6) . 2_655 ?
 C7 N2 K1 91.34(7) . . ?
 C7 N2 C8 120.75(9) . . ?
 C8 N2 K1 129.62(7) . 2_655 ?
 C8 N2 K1 135.94(7) . . ?
 K1 N1 K1 76.21(2) . 2_655 ?
 C7 N1 K1 91.30(6) . . ?
 C7 N1 K1 91.35(6) . 2_655 ?
 C7 N1 C6 120.39(9) . . ?
 C6 N1 K1 134.82(7) . . ?
 C6 N1 K1 128.67(7) . 2_655 ?
 N2 C7 K1 66.76(6) . 2_655 ?
 N1 C7 K1 63.99(6) . 2_655 ?
 N1 C7 N2 117.74(9) . . ?
 N2 C8 C13 128.23(9) . . ?
 N2 C8 C9 118.93(9) . . ?
 C13 C8 C9 112.62(10) . . ?
 F4 C13 K1 118.41(6) . 2 ?
 F4 C13 C8 117.72(10) . . ?
 F4 C13 C12 117.28(9) . . ?
 C8 C13 K1 83.73(6) . 2 ?
 C12 C13 K1 72.37(6) . 2 ?
 C12 C13 C8 124.97(10) . . ?
 F3 C9 K1 117.14(6) . 2 ?
 F3 C9 C8 116.72(10) . . ?
 F3 C9 C10 118.26(9) . . ?
 C8 C9 K1 84.06(6) . 2 ?
 C10 C9 K1 71.26(6) . 2 ?
 C10 C9 C8 125.02(10) . . ?
 N1 C6 C5 127.32(10) . . ?
 N1 C6 C1 119.25(9) . . ?
 C1 C6 C5 113.14(10) . . ?
 F2 C5 C6 117.46(10) . . ?
 F2 C5 C4 117.66(10) . . ?
 C4 C5 C6 124.81(11) . . ?
 C13 C12 K1 84.58(7) . 2 ?
 C13 C12 C11 118.91(10) . . ?
 C11 C12 K1 73.22(6) . 2 ?
 C9 C10 K1 85.66(6) . 2 ?
 C9 C10 C11 119.02(10) . . ?
 C11 C10 K1 74.54(6) . 2 ?
 C5 C4 C3 118.56(11) . . ?
 F1 C1 C6 116.88(10) . . ?
 F1 C1 C2 118.46(11) . . ?
 C2 C1 C6 124.66(11) . . ?
 C12 C11 K1 82.49(6) . 2 ?
 C10 C11 K1 81.00(7) . 2 ?
 C10 C11 C12 119.44(11) . . ?
 C1 C2 C3 118.83(12) . . ?
 C4 C3 C2 119.99(11) . . ?

_olex2_submission_special_instructions 'No special instructions were received'
