# Supplementary material
Source: MDPI journal article supplement (https://www.mdpi.com/2304-6740/5/2/26)
Supplement: s1 [file s1 › [K2(DFForm)2(thf)2].cif]

data_2
_audit_creation_date              2017-02-14
_audit_creation_method
;
Olex2 1.2
(compiled 2017.01.04 svn.r3372 for OlexSys, GUI svn.r5292)
;
_publ_contact_author_address      ?
_publ_contact_author_email        ?
_publ_contact_author_id_orcid     ?
_publ_contact_author_name         ''
_publ_contact_author_phone        ?
_publ_section_references
;
Dolomanov, O.V., Bourhis, L.J., Gildea, R.J, Howard, J.A.K. & Puschmann, H.
 (2009), J. Appl. Cryst. 42, 339-341.

Palatinus, L. & Chapuis, G. (2007). J. Appl. Cryst., 40, 786-790;
Palatinus, L. & van der Lee, A. (2008). J. Appl. Cryst. 41, 975-984;
Palatinus, L., Prathapa, S. J. & van Smaalen, S. (2012). J. Appl. Cryst. 45,
 575-580.

Sheldrick, G.M. (2008). Acta Cryst. A64, 112-122.
;
_chemical_name_common             ?
_chemical_name_systematic
;
 ? 
;
_chemical_formula_moiety          '0.5(C34 H30 F8 K2 N4 O2)'
_chemical_formula_sum             'C17 H15 F4 K N2 O'
_chemical_formula_weight          378.41
_chemical_absolute_configuration  ad
_chemical_melting_point           ?
loop_
  _atom_type_symbol
  _atom_type_description
  _atom_type_scat_dispersion_real
  _atom_type_scat_dispersion_imag
  _atom_type_scat_source
 'C' 'C' 0.0033 0.0016 'International Tables Vol C Tables 4.2.6.8 and 6.1.1.4'
 'H' 'H' 0.0000 0.0000 'International Tables Vol C Tables 4.2.6.8 and 6.1.1.4'
 'F' 'F' 0.0171 0.0103 'International Tables Vol C Tables 4.2.6.8 and 6.1.1.4'
 'K' 'K' 0.2009 0.2494 'International Tables Vol C Tables 4.2.6.8 and 6.1.1.4'
 'N' 'N' 0.0061 0.0033 'International Tables Vol C Tables 4.2.6.8 and 6.1.1.4'
 'O' 'O' 0.0106 0.0060 'International Tables Vol C Tables 4.2.6.8 and 6.1.1.4'

_space_group_crystal_system       'monoclinic'
_space_group_IT_number            4
_space_group_name_H-M_alt         'P 1 21 1'
_space_group_name_Hall            'P 2yb'
loop_
  _space_group_symop_id
  _space_group_symop_operation_xyz
 1 'x, y, z'
 2 '-x, y+1/2, -z'

_cell_length_a                    7.55040(10)
_cell_length_b                    19.8885(3)
_cell_length_c                    11.6408(2)
_cell_angle_alpha                 90.00
_cell_angle_beta                  105.4479(6)
_cell_angle_gamma                 90.00
_cell_volume                      1684.90(4)
_cell_formula_units_Z             4
_cell_measurement_reflns_used     9909
_cell_measurement_temperature     100.1
_cell_measurement_theta_max       30.27
_cell_measurement_theta_min       2.74
_exptl_absorpt_coefficient_mu     0.364
_exptl_absorpt_correction_T_max   0.7460
_exptl_absorpt_correction_T_min   0.6903
_exptl_absorpt_correction_type    multi-scan
_exptl_absorpt_process_details
'SADABS-2014/5 (Bruker,2014/5) was used for absorption correction. wR2(int) was 0.0355 before and 0.0280 after correction. The Ratio of minimum to maximum transmission is 0.9253. The \l/2 correction factor is 0.00150.'
_exptl_crystal_colour             'clear colourless'
_exptl_crystal_colour_lustre      clear
_exptl_crystal_colour_primary     colourless
_exptl_crystal_density_diffrn     1.492
_exptl_crystal_density_meas       ?
_exptl_crystal_density_method     'not measured'
_exptl_crystal_description        block
_exptl_crystal_F_000              776
_exptl_crystal_size_max           0.2
_exptl_crystal_size_mid           0.1
_exptl_crystal_size_min           0.1
_exptl_special_details
;
 ? 
;
_diffrn_reflns_av_R_equivalents   0.0136
_diffrn_reflns_av_unetI/netI      0.0201
_diffrn_reflns_limit_h_max        10
_diffrn_reflns_limit_h_min        -9
_diffrn_reflns_limit_k_max        25
_diffrn_reflns_limit_k_min        -28
_diffrn_reflns_limit_l_max        16
_diffrn_reflns_limit_l_min        -16
_diffrn_reflns_number             17983
_diffrn_reflns_theta_full         26.50
_diffrn_reflns_theta_max          30.33
_diffrn_reflns_theta_min          1.81
_diffrn_ambient_temperature       100.1
_diffrn_detector_area_resol_mean  ?
_diffrn_measured_fraction_theta_full 1.000
_diffrn_measured_fraction_theta_max 0.997
_diffrn_measurement_device_type   'Bruker APEX-II CCD'
_diffrn_measurement_method        '\f and \w scans'
_diffrn_radiation_monochromator   graphite
_diffrn_radiation_type            MoK\a
_diffrn_radiation_wavelength      0.71073
_diffrn_source                    'fine-focus sealed tube'
_diffrn_special_details           ?
_diffrn_standards_number          0
_reflns_number_gt                 7977
_reflns_number_total              8299
_reflns_threshold_expression      >2sigma(I)
_computing_cell_refinement        'SAINT v8.34A (Bruker, 2013)'
_computing_data_collection        ?
_computing_data_reduction         'SAINT v8.34A (Bruker, 2013)'
_computing_molecular_graphics     'Olex2 (Dolomanov et al., 2009)'
_computing_publication_material   'Olex2 (Dolomanov et al., 2009)'
_computing_structure_refinement   'XL (Sheldrick, 2008)'
_computing_structure_solution
;
Superflip (Palatinus & Chapuis, 2007;Palatinus & van der Lee, 2008;
Palatinus et al., 2012)
;
_refine_diff_density_max          0.280
_refine_diff_density_min          -0.164
_refine_diff_density_rms          0.041
_refine_ls_abs_structure_details  'Flack H D (1983), Acta Cryst. A39, 876-881'
_refine_ls_abs_structure_Flack    0.691(17)
_refine_ls_extinction_coef        ?
_refine_ls_extinction_method      none
_refine_ls_goodness_of_fit_ref    1.028
_refine_ls_hydrogen_treatment     mixed
_refine_ls_matrix_type            full
_refine_ls_number_parameters      475
_refine_ls_number_reflns          8299
_refine_ls_number_restraints      1
_refine_ls_R_factor_all           0.0280
_refine_ls_R_factor_gt            0.0262
_refine_ls_restrained_S_all       1.028
_refine_ls_shift/su_max           0.002
_refine_ls_shift/su_mean          0.000
_refine_ls_structure_factor_coef  Fsqd
_refine_ls_weighting_details
'calc w=1/[\s^2^(Fo^2^)+(0.0352P)^2^+0.4330P] where P=(Fo^2^+2Fc^2^)/3'
_refine_ls_weighting_scheme       calc
_refine_ls_wR_factor_gt           0.0640
_refine_ls_wR_factor_ref          0.0652
_refine_special_details
;
 Refinement of F^2^ against ALL reflections.  The weighted R-factor wR and 
 goodness of fit S are based on F^2^, conventional R-factors R are based 
 on F, with F set to zero for negative F^2^. The threshold expression of 
 F^2^ > 2sigma(F^2^) is used only for calculating R-factors(gt) etc. and is 
 not relevant to the choice of reflections for refinement.  R-factors based 
 on F^2^ are statistically about twice as large as those based on F, and R- 
 factors based on ALL data will be even larger. 
;
_olex2_refinement_description
;
1. Fixed Uiso
 At 1.2 times of:
  All C(H) groups, All C(H,H) groups
2.a Secondary CH2 refined with riding coordinates:
 C29(H29A,H29B), C34(H34A,H34B), C33(H33A,H33B), C32(H32A,H32B), C27(H27A,
 H27B), C28(H28A,H28B)
2.b Aromatic/amide H refined with riding coordinates:
 C15(H15), C25(H25), C17(H17), C12(H12), C4(H4), C10(H10), C24(H24), C11(H11),
 C2(H2), C23(H23), C3(H3), C16(H16)
;
_atom_sites_solution_hydrogens    geom
_atom_sites_solution_primary      iterative
_atom_sites_solution_secondary    difmap
loop_
  _atom_site_label
  _atom_site_type_symbol
  _atom_site_fract_x
  _atom_site_fract_y
  _atom_site_fract_z
  _atom_site_U_iso_or_equiv
  _atom_site_adp_type
  _atom_site_occupancy
  _atom_site_calc_flag
  _atom_site_disorder_assembly
  _atom_site_disorder_group
  _atom_site_refinement_flags_posn
 K1 K 0.32110(4) 0.289041(16) 0.29227(2) 0.01639(6) Uani 1 d . . .
 K2 K 0.73686(4) 0.246889(17) 0.19344(3) 0.01878(6) Uani 1 d . . .
 F2 F 0.65225(13) 0.04065(5) 0.42317(8) 0.02117(19) Uani 1 d . . .
 F3 F 0.54351(13) 0.13117(5) -0.01317(7) 0.01994(18) Uani 1 d . . .
 F1 F 0.48177(13) 0.24312(5) 0.57411(7) 0.02120(18) Uani 1 d . . .
 F8 F 0.35558(13) 0.48967(5) 0.04195(7) 0.01987(19) Uani 1 d . . .
 F6 F 0.90794(14) 0.46973(5) 0.32855(8) 0.0238(2) Uani 1 d . . .
 F5 F 0.47993(14) 0.37868(5) 0.51527(7) 0.0231(2) Uani 1 d . . .
 F4 F 0.05439(13) 0.14418(5) 0.16662(7) 0.0236(2) Uani 1 d . . .
 F7 F 0.53428(14) 0.27417(5) -0.05455(7) 0.0220(2) Uani 1 d . . .
 O1 O 0.04556(15) 0.24546(6) 0.39277(8) 0.0181(2) Uani 1 d . . .
 O2 O 0.98924(17) 0.31680(6) 0.09973(10) 0.0231(2) Uani 1 d . . .
 N1 N 0.53660(17) 0.17713(6) 0.38259(10) 0.0149(2) Uani 1 d . . .
 N4 N 0.50520(17) 0.35832(6) 0.12093(9) 0.0140(2) Uani 1 d . . .
 N3 N 0.60535(18) 0.37929(6) 0.31979(9) 0.0151(2) Uani 1 d . . .
 N2 N 0.42663(18) 0.17058(7) 0.17916(10) 0.0161(2) Uani 1 d . . .
 C21 C 0.45382(19) 0.38101(7) 0.00372(11) 0.0121(2) Uani 1 d . . .
 C14 C 0.6280(2) 0.41841(8) 0.51885(12) 0.0153(3) Uani 1 d . . .
 C26 C 0.3794(2) 0.44333(7) -0.03902(11) 0.0140(3) Uani 1 d . . .
 C6 C 0.56015(19) 0.14339(8) 0.49079(11) 0.0132(2) Uani 1 d . . .
 C20 C 0.57471(19) 0.40098(7) 0.20916(11) 0.0128(2) Uani 1 d . . .
 C8 C 0.3081(2) 0.13712(7) 0.08407(11) 0.0139(3) Uani 1 d . . .
 C18 C 0.8348(2) 0.46523(8) 0.42383(12) 0.0161(3) Uani 1 d . . .
 C19 C 0.6867(2) 0.42165(7) 0.41444(11) 0.0125(2) Uani 1 d . . .
 C1 C 0.5365(2) 0.17799(8) 0.59056(12) 0.0154(3) Uani 1 d . . .
 C15 C 0.7066(2) 0.45317(8) 0.62240(12) 0.0185(3) Uani 1 d . . .
 H15 H 0.6614 0.4481 0.6907 0.022 Uiso 1 calc . . R
 C25 C 0.3226(2) 0.46129(8) -0.15823(12) 0.0172(3) Uani 1 d . . .
 H25 H 0.2760 0.5050 -0.1811 0.021 Uiso 1 calc . . R
 C17 C 0.9183(2) 0.50193(8) 0.52430(13) 0.0201(3) Uani 1 d . . .
 H17 H 1.0186 0.5309 0.5249 0.024 Uiso 1 calc . . R
 C5 C 0.6169(2) 0.07694(8) 0.51404(12) 0.0158(3) Uani 1 d . . .
 C12 C 0.0030(2) 0.09457(8) -0.02321(13) 0.0196(3) Uani 1 d . . .
 H12 H -0.1217 0.0867 -0.0248 0.024 Uiso 1 calc . . R
 C7 C 0.44510(19) 0.14402(8) 0.28611(11) 0.0135(2) Uani 1 d . . .
 C29 C 0.0334(2) 0.20130(11) 0.58058(14) 0.0304(4) Uani 1 d . . .
 H29A H -0.0449 0.1695 0.6105 0.036 Uiso 1 calc . . R
 H29B H 0.1575 0.2022 0.6368 0.036 Uiso 1 calc . . R
 C4 C 0.6440(2) 0.04594(8) 0.62364(13) 0.0191(3) Uani 1 d . . .
 H4 H 0.6821 0.0003 0.6342 0.023 Uiso 1 calc . . R
 C10 C 0.2525(2) 0.08916(8) -0.11688(12) 0.0187(3) Uani 1 d . . .
 H10 H 0.2986 0.0774 -0.1825 0.022 Uiso 1 calc . . R
 C24 C 0.3352(2) 0.41405(8) -0.24367(12) 0.0193(3) Uani 1 d . . .
 H24 H 0.2957 0.4251 -0.3260 0.023 Uiso 1 calc . . R
 C9 C 0.3650(2) 0.11873(7) -0.01649(12) 0.0148(3) Uani 1 d . . .
 C13 C 0.1231(2) 0.12370(8) 0.07444(11) 0.0167(3) Uani 1 d . . .
 C34 C 1.0171(3) 0.29056(10) -0.00984(14) 0.0254(3) Uani 1 d . . .
 H34A H 0.9483 0.2480 -0.0318 0.030 Uiso 1 calc . . R
 H34B H 1.1491 0.2816 -0.0005 0.030 Uiso 1 calc . . R
 C11 C 0.0706(2) 0.07706(9) -0.11969(13) 0.0206(3) Uani 1 d . . .
 H11 H -0.0088 0.0566 -0.1880 0.025 Uiso 1 calc . . R
 C33 C 0.9467(2) 0.34393(9) -0.10607(13) 0.0226(3) Uani 1 d . . .
 H33A H 0.8305 0.3292 -0.1627 0.027 Uiso 1 calc . . R
 H33B H 1.0386 0.3529 -0.1509 0.027 Uiso 1 calc . . R
 C30 C 0.0422(2) 0.18235(9) 0.45521(14) 0.0219(3) Uani 1 d . . .
 C32 C 0.9155(2) 0.40661(9) -0.03733(14) 0.0228(3) Uani 1 d . . .
 H32A H 0.9746 0.4466 -0.0619 0.027 Uiso 1 calc . . R
 H32B H 0.7827 0.4157 -0.0503 0.027 Uiso 1 calc . . R
 C2 C 0.5623(2) 0.14985(8) 0.70224(12) 0.0194(3) Uani 1 d . . .
 H2 H 0.5448 0.1758 0.7668 0.023 Uiso 1 calc . . R
 C22 C 0.4627(2) 0.33598(7) -0.08814(11) 0.0144(3) Uani 1 d . . .
 C23 C 0.4061(2) 0.35054(8) -0.20794(12) 0.0182(3) Uani 1 d . . .
 H23 H 0.4152 0.3177 -0.2654 0.022 Uiso 1 calc . . R
 C27 C 0.0369(2) 0.30066(9) 0.47169(15) 0.0232(3) Uani 1 d . . .
 H27A H -0.0383 0.3379 0.4274 0.028 Uiso 1 calc . . R
 H27B H 0.1616 0.3178 0.5105 0.028 Uiso 1 calc . . R
 C3 C 0.6143(2) 0.08299(9) 0.71815(12) 0.0209(3) Uani 1 d . . .
 H3 H 0.6297 0.0624 0.7938 0.025 Uiso 1 calc . . R
 C28 C -0.0514(3) 0.27138(11) 0.56317(15) 0.0306(4) Uani 1 d . . .
 H28A H -0.1868 0.2693 0.5323 0.037 Uiso 1 calc . . R
 H28B H -0.0189 0.2975 0.6382 0.037 Uiso 1 calc . . R
 C16 C 0.8528(2) 0.49566(9) 0.62470(13) 0.0212(3) Uani 1 d . . .
 H16 H 0.9082 0.5205 0.6948 0.025 Uiso 1 calc . . R
 C31 C 1.0050(3) 0.38871(9) 0.09217(14) 0.0236(3) Uani 1 d . . .
 H20 H 0.596(3) 0.4449(10) 0.1914(15) 0.013(4) Uiso 1 d . . .
 H7 H 0.392(3) 0.1006(10) 0.2930(16) 0.019(5) Uiso 1 d . . .
 H31A H 1.133(3) 0.4005(10) 0.1158(16) 0.016(4) Uiso 1 d . . .
 H30A H -0.070(3) 0.1558(11) 0.4114(17) 0.025(5) Uiso 1 d . . .
 H30B H 0.146(3) 0.1564(11) 0.4533(17) 0.024(5) Uiso 1 d . . .
 H31B H 0.946(3) 0.4081(11) 0.1473(17) 0.023(5) Uiso 1 d . . .

loop_
  _atom_site_aniso_label
  _atom_site_aniso_U_11
  _atom_site_aniso_U_22
  _atom_site_aniso_U_33
  _atom_site_aniso_U_23
  _atom_site_aniso_U_13
  _atom_site_aniso_U_12
 K1 0.01424(14) 0.01632(15) 0.01979(12) 0.00001(10) 0.00660(10) -0.00189(13)
 K2 0.01245(14) 0.01875(15) 0.02401(13) 0.00631(11) 0.00289(11) -0.00179(13)
 F2 0.0193(4) 0.0194(5) 0.0240(4) -0.0064(3) 0.0044(3) 0.0035(4)
 F3 0.0161(4) 0.0240(5) 0.0213(4) -0.0024(3) 0.0077(3) -0.0020(4)
 F1 0.0274(5) 0.0163(4) 0.0211(4) -0.0016(3) 0.0085(3) 0.0047(4)
 F8 0.0250(5) 0.0151(4) 0.0187(4) -0.0038(3) 0.0046(3) 0.0056(4)
 F6 0.0224(5) 0.0299(6) 0.0226(4) -0.0037(4) 0.0122(4) -0.0101(4)
 F5 0.0256(5) 0.0255(5) 0.0209(4) -0.0021(3) 0.0111(4) -0.0110(4)
 F4 0.0202(5) 0.0336(6) 0.0195(4) -0.0064(4) 0.0099(3) -0.0037(4)
 F7 0.0306(5) 0.0149(4) 0.0192(4) -0.0012(3) 0.0047(3) 0.0069(4)
 O1 0.0192(5) 0.0170(5) 0.0193(4) 0.0013(4) 0.0070(4) 0.0006(5)
 O2 0.0234(6) 0.0245(6) 0.0235(5) 0.0032(4) 0.0100(4) -0.0026(5)
 N1 0.0155(6) 0.0156(6) 0.0132(4) -0.0003(4) 0.0031(4) -0.0016(5)
 N4 0.0153(6) 0.0143(6) 0.0119(4) 0.0000(4) 0.0031(4) -0.0002(5)
 N3 0.0171(6) 0.0149(6) 0.0129(5) -0.0006(4) 0.0032(4) -0.0024(5)
 N2 0.0182(6) 0.0171(6) 0.0128(5) -0.0017(4) 0.0037(4) -0.0062(5)
 C21 0.0112(6) 0.0132(6) 0.0124(5) -0.0014(4) 0.0042(4) -0.0010(5)
 C14 0.0147(7) 0.0144(7) 0.0164(5) 0.0020(5) 0.0035(5) 0.0000(6)
 C26 0.0149(7) 0.0131(6) 0.0149(5) -0.0018(4) 0.0054(5) -0.0007(5)
 C6 0.0095(6) 0.0154(7) 0.0138(5) -0.0007(4) 0.0017(4) -0.0020(5)
 C20 0.0108(6) 0.0124(6) 0.0158(5) 0.0008(4) 0.0044(5) -0.0007(5)
 C8 0.0161(7) 0.0123(6) 0.0131(5) 0.0002(4) 0.0034(5) -0.0021(6)
 C18 0.0151(7) 0.0164(7) 0.0175(5) 0.0003(5) 0.0056(5) 0.0002(6)
 C19 0.0129(6) 0.0112(6) 0.0126(5) 0.0013(4) 0.0019(5) 0.0011(5)
 C1 0.0139(6) 0.0156(7) 0.0165(5) -0.0006(5) 0.0039(5) 0.0005(6)
 C15 0.0203(7) 0.0212(8) 0.0133(5) -0.0009(5) 0.0031(5) 0.0021(6)
 C25 0.0175(7) 0.0162(7) 0.0176(6) 0.0042(5) 0.0040(5) 0.0018(6)
 C17 0.0149(7) 0.0195(8) 0.0251(6) -0.0050(5) 0.0038(6) -0.0027(6)
 C5 0.0108(6) 0.0170(7) 0.0183(6) -0.0027(5) 0.0016(5) 0.0001(6)
 C12 0.0143(7) 0.0219(8) 0.0210(6) -0.0030(5) 0.0020(5) -0.0024(6)
 C7 0.0112(6) 0.0137(7) 0.0163(5) -0.0009(5) 0.0048(5) -0.0015(5)
 C29 0.0192(8) 0.0487(12) 0.0226(7) 0.0118(7) 0.0046(6) -0.0047(8)
 C4 0.0135(7) 0.0164(7) 0.0240(6) 0.0036(5) -0.0009(5) -0.0006(6)
 C10 0.0200(7) 0.0206(8) 0.0153(5) -0.0039(5) 0.0042(5) 0.0009(6)
 C24 0.0202(7) 0.0233(8) 0.0150(5) 0.0026(5) 0.0057(5) 0.0002(6)
 C9 0.0136(7) 0.0146(7) 0.0161(5) 0.0001(5) 0.0038(5) 0.0000(6)
 C13 0.0181(7) 0.0173(7) 0.0154(5) -0.0023(5) 0.0059(5) -0.0016(6)
 C34 0.0289(8) 0.0214(8) 0.0277(7) -0.0007(6) 0.0107(6) 0.0018(8)
 C11 0.0195(7) 0.0194(8) 0.0200(6) -0.0063(5) 0.0005(5) -0.0012(6)
 C33 0.0218(8) 0.0253(9) 0.0220(6) 0.0007(6) 0.0080(6) -0.0011(7)
 C30 0.0186(8) 0.0174(8) 0.0297(7) 0.0048(6) 0.0062(6) 0.0002(7)
 C32 0.0185(8) 0.0229(8) 0.0288(7) 0.0028(6) 0.0091(6) 0.0007(7)
 C2 0.0183(7) 0.0246(8) 0.0147(5) -0.0006(5) 0.0032(5) -0.0006(6)
 C22 0.0145(6) 0.0129(6) 0.0164(5) -0.0006(4) 0.0052(5) 0.0012(5)
 C23 0.0203(7) 0.0205(7) 0.0149(5) -0.0026(5) 0.0069(5) 0.0004(6)
 C27 0.0192(7) 0.0188(8) 0.0328(7) -0.0049(6) 0.0089(6) 0.0000(6)
 C3 0.0181(7) 0.0252(8) 0.0170(6) 0.0047(5) 0.0006(5) -0.0029(7)
 C28 0.0219(8) 0.0462(12) 0.0270(7) -0.0118(7) 0.0123(6) -0.0052(8)
 C16 0.0178(7) 0.0246(8) 0.0185(6) -0.0070(5) 0.0003(5) 0.0010(6)
 C31 0.0235(8) 0.0250(9) 0.0253(7) -0.0030(6) 0.0117(6) -0.0037(7)

_geom_special_details
;
 All esds (except the esd in the dihedral angle between two l.s. planes) 
 are estimated using the full covariance matrix.  The cell esds are taken 
 into account individually in the estimation of esds in distances, angles 
 and torsion angles; correlations between esds in cell parameters are only 
 used when they are defined by crystal symmetry.  An approximate (isotropic) 
 treatment of cell esds is used for estimating esds involving l.s. planes. 
;
loop_
  _geom_bond_atom_site_label_1
  _geom_bond_atom_site_label_2
  _geom_bond_distance
  _geom_bond_site_symmetry_2
  _geom_bond_publ_flag
 K1 K2 3.7154(4) . ?
 K1 F1 3.3090(9) . ?
 K1 F5 3.1141(10) . ?
 K1 O1 2.7830(11) . ?
 K1 O2 2.9351(13) 1_455 ?
 K1 N1 2.7921(13) . ?
 K1 N4 3.0472(12) . ?
 K1 N3 2.7504(13) . ?
 K1 N2 2.9118(13) . ?
 K1 C20 3.2475(14) . ?
 K1 C7 3.0391(15) . ?
 K1 C31 3.4769(19) 1_455 ?
 K2 F3 3.3678(10) . ?
 K2 F4 3.2276(11) 1_655 ?
 K2 F7 2.9353(9) . ?
 K2 O1 2.8172(11) 1_655 ?
 K2 O2 2.8039(12) . ?
 K2 N1 3.2913(12) . ?
 K2 N4 2.8102(13) . ?
 K2 N3 3.2957(13) . ?
 K2 N2 2.7587(13) . ?
 K2 C20 3.3232(15) . ?
 K2 C7 3.3864(14) . ?
 K2 C30 3.5362(17) 1_655 ?
 F2 C5 1.3644(16) . ?
 F3 C9 1.3610(17) . ?
 F1 C1 1.3576(18) . ?
 F8 C26 1.3641(15) . ?
 F6 C18 1.3674(15) . ?
 F5 C14 1.3608(18) . ?
 F4 K2 3.2275(11) 1_455 ?
 F4 C13 1.3724(15) . ?
 F7 C22 1.3578(17) . ?
 O1 K2 2.8172(11) 1_455 ?
 O1 C30 1.4539(19) . ?
 O1 C27 1.4442(19) . ?
 O2 K1 2.9350(12) 1_655 ?
 O2 C34 1.4444(18) . ?
 O2 C31 1.440(2) . ?
 N1 C6 1.3960(16) . ?
 N1 C7 1.3263(17) . ?
 N4 C21 1.3906(16) . ?
 N4 C20 1.3278(17) . ?
 N3 C20 1.3188(16) . ?
 N3 C19 1.3930(17) . ?
 N2 C8 1.3932(18) . ?
 N2 C7 1.3250(16) . ?
 C21 C26 1.397(2) . ?
 C21 C22 1.4100(17) . ?
 C14 C19 1.4015(17) . ?
 C14 C15 1.379(2) . ?
 C26 C25 1.3857(18) . ?
 C6 C1 1.4018(18) . ?
 C6 C5 1.394(2) . ?
 C8 C9 1.3984(17) . ?
 C8 C13 1.397(2) . ?
 C18 C19 1.396(2) . ?
 C18 C17 1.380(2) . ?
 C1 C2 1.3807(18) . ?
 C15 C16 1.385(2) . ?
 C25 C24 1.390(2) . ?
 C17 C16 1.391(2) . ?
 C5 C4 1.382(2) . ?
 C12 C13 1.379(2) . ?
 C12 C11 1.396(2) . ?
 C29 C30 1.526(2) . ?
 C29 C28 1.525(3) . ?
 C4 C3 1.391(2) . ?
 C10 C9 1.3799(19) . ?
 C10 C11 1.386(2) . ?
 C24 C23 1.391(2) . ?
 C34 C33 1.532(2) . ?
 C33 C32 1.533(2) . ?
 C30 K2 3.5362(17) 1_455 ?
 C32 C31 1.521(2) . ?
 C2 C3 1.385(2) . ?
 C22 C23 1.3762(18) . ?
 C27 C28 1.515(2) . ?
 C31 K1 3.4769(19) 1_655 ?

loop_
  _geom_angle_atom_site_label_1
  _geom_angle_atom_site_label_2
  _geom_angle_atom_site_label_3
  _geom_angle
  _geom_angle_site_symmetry_1
  _geom_angle_site_symmetry_3
  _geom_angle_publ_flag
 F1 K1 K2 97.346(18) . . ?
 F1 K1 C31 145.74(3) . 1_455 ?
 F5 K1 K2 102.58(2) . . ?
 F5 K1 F1 51.20(3) . . ?
 F5 K1 C20 74.28(3) . . ?
 F5 K1 C31 105.98(4) . 1_455 ?
 O1 K1 K2 147.97(3) . . ?
 O1 K1 F1 67.35(3) . . ?
 O1 K1 F5 89.59(3) . . ?
 O1 K1 O2 78.34(3) . 1_455 ?
 O1 K1 N1 91.11(4) . . ?
 O1 K1 N4 159.79(3) . . ?
 O1 K1 N2 105.27(4) . . ?
 O1 K1 C20 154.81(4) . . ?
 O1 K1 C7 89.07(4) . . ?
 O1 K1 C31 90.15(4) . 1_455 ?
 O2 K1 K2 115.21(2) 1_455 . ?
 O2 K1 F1 145.28(3) 1_455 . ?
 O2 K1 F5 126.14(3) 1_455 . ?
 O2 K1 N4 81.99(3) 1_455 . ?
 O2 K1 C20 95.44(3) 1_455 . ?
 O2 K1 C7 111.48(4) 1_455 . ?
 O2 K1 C31 24.10(4) 1_455 1_455 ?
 N1 K1 K2 58.74(2) . . ?
 N1 K1 F1 51.95(3) . . ?
 N1 K1 F5 94.94(3) . . ?
 N1 K1 O2 136.96(4) . 1_455 ?
 N1 K1 N4 106.57(3) . . ?
 N1 K1 N2 47.39(3) . . ?
 N1 K1 C20 109.14(4) . . ?
 N1 K1 C7 25.85(3) . . ?
 N1 K1 C31 159.06(4) . 1_455 ?
 N4 K1 K2 47.86(2) . . ?
 N4 K1 F1 131.53(3) . . ?
 N4 K1 F5 98.35(3) . . ?
 N4 K1 C20 24.08(3) . . ?
 N4 K1 C31 69.82(4) . 1_455 ?
 N3 K1 K2 59.06(3) . . ?
 N3 K1 F1 89.77(3) . . ?
 N3 K1 F5 54.12(3) . . ?
 N3 K1 O1 143.31(3) . . ?
 N3 K1 O2 116.56(4) . 1_455 ?
 N3 K1 N1 96.78(4) . . ?
 N3 K1 N4 45.84(3) . . ?
 N3 K1 N2 106.36(4) . . ?
 N3 K1 C20 23.59(3) . . ?
 N3 K1 C7 112.73(4) . . ?
 N3 K1 C31 94.65(4) . 1_455 ?
 N2 K1 K2 47.30(3) . . ?
 N2 K1 F1 98.79(3) . . ?
 N2 K1 F5 138.52(3) . . ?
 N2 K1 O2 95.03(4) . 1_455 ?
 N2 K1 N4 80.94(3) . . ?
 N2 K1 C20 99.55(3) . . ?
 N2 K1 C7 25.62(3) . . ?
 N2 K1 C31 112.34(4) . 1_455 ?
 C20 K1 K2 56.54(3) . . ?
 C20 K1 F1 113.27(3) . . ?
 C20 K1 C31 76.32(4) . 1_455 ?
 C7 K1 K2 59.17(3) . . ?
 C7 K1 F1 74.19(3) . . ?
 C7 K1 F5 120.69(3) . . ?
 C7 K1 N4 102.51(3) . . ?
 C7 K1 C20 115.71(4) . . ?
 C7 K1 C31 133.32(4) . 1_455 ?
 C31 K1 K2 114.02(3) 1_455 . ?
 F3 K2 C7 67.64(3) . . ?
 F3 K2 C30 115.24(3) . 1_655 ?
 F4 K2 F3 71.96(2) 1_655 . ?
 F4 K2 N1 106.46(3) 1_655 . ?
 F4 K2 N3 150.31(3) 1_655 . ?
 F4 K2 C20 152.01(3) 1_655 . ?
 F4 K2 C7 102.21(3) 1_655 . ?
 F4 K2 C30 61.52(3) 1_655 1_655 ?
 F7 K2 F3 53.89(2) . . ?
 F7 K2 F4 103.16(3) . 1_655 ?
 F7 K2 N1 121.60(3) . . ?
 F7 K2 N3 98.70(3) . . ?
 F7 K2 C20 77.32(3) . . ?
 F7 K2 C7 102.25(3) . . ?
 F7 K2 C30 164.56(4) . 1_655 ?
 O1 K2 F3 133.43(3) 1_655 . ?
 O1 K2 F4 66.44(3) 1_655 1_655 ?
 O1 K2 F7 155.78(3) 1_655 . ?
 O1 K2 N1 82.62(3) 1_655 . ?
 O1 K2 N3 85.53(3) 1_655 . ?
 O1 K2 C20 101.54(4) 1_655 . ?
 O1 K2 C7 101.38(3) 1_655 . ?
 O1 K2 C30 23.09(4) 1_655 1_655 ?
 O2 K2 F3 105.74(3) . . ?
 O2 K2 F4 71.15(3) . 1_655 ?
 O2 K2 F7 75.87(3) . . ?
 O2 K2 O1 80.01(3) . 1_655 ?
 O2 K2 N1 161.85(3) . . ?
 O2 K2 N4 85.71(4) . . ?
 O2 K2 N3 95.40(3) . . ?
 O2 K2 C20 82.10(4) . . ?
 O2 K2 C7 172.17(4) . . ?
 O2 K2 C30 99.24(4) . 1_655 ?
 N1 K2 F3 90.04(3) . . ?
 N1 K2 N3 77.97(3) . . ?
 N1 K2 C20 96.33(3) . . ?
 N1 K2 C7 22.85(3) . . ?
 N1 K2 C30 65.21(4) . 1_655 ?
 N4 K2 F3 101.99(3) . . ?
 N4 K2 F4 152.75(3) . 1_655 ?
 N4 K2 F7 55.89(3) . . ?
 N4 K2 O1 124.58(4) . 1_655 ?
 N4 K2 N1 99.98(3) . . ?
 N4 K2 N3 42.82(3) . . ?
 N4 K2 C20 23.12(3) . . ?
 N4 K2 C7 99.58(4) . . ?
 N4 K2 C30 139.10(4) . 1_655 ?
 N3 K2 F3 137.72(3) . . ?
 N3 K2 C20 22.98(3) . . ?
 N3 K2 C7 92.39(3) . . ?
 N3 K2 C30 96.33(4) . 1_655 ?
 N2 K2 F3 51.79(3) . . ?
 N2 K2 F4 106.66(3) . 1_655 ?
 N2 K2 F7 80.26(3) . . ?
 N2 K2 O1 123.16(3) . 1_655 ?
 N2 K2 O2 154.62(3) . . ?
 N2 K2 N1 43.48(3) . . ?
 N2 K2 N4 88.01(4) . . ?
 N2 K2 N3 96.58(4) . . ?
 N2 K2 C20 101.03(4) . . ?
 N2 K2 C7 22.01(3) . . ?
 N2 K2 C30 101.56(4) . 1_655 ?
 C20 K2 F3 125.00(3) . . ?
 C20 K2 C7 105.02(3) . . ?
 C20 K2 C30 116.90(4) . 1_655 ?
 C7 K2 C30 80.58(4) . 1_655 ?
 C9 F3 K2 112.47(7) . . ?
 C1 F1 K1 114.87(7) . . ?
 C14 F5 K1 119.26(7) . . ?
 C13 F4 K2 135.14(9) . 1_455 ?
 C22 F7 K2 120.91(7) . . ?
 K1 O1 K2 101.40(3) . 1_455 ?
 C30 O1 K1 126.41(9) . . ?
 C30 O1 K2 107.44(9) . 1_455 ?
 C27 O1 K1 101.31(9) . . ?
 C27 O1 K2 110.40(9) . 1_455 ?
 C27 O1 C30 109.18(11) . . ?
 K2 O2 K1 98.05(3) . 1_655 ?
 C34 O2 K1 108.12(9) . 1_655 ?
 C34 O2 K2 115.98(10) . . ?
 C31 O2 K1 99.55(10) . 1_655 ?
 C31 O2 K2 126.32(9) . . ?
 C31 O2 C34 105.73(12) . . ?
 K1 N1 K2 74.78(3) . . ?
 C6 N1 K1 130.11(9) . . ?
 C6 N1 K2 146.65(9) . . ?
 C7 N1 K1 87.54(9) . . ?
 C7 N1 K2 82.61(8) . . ?
 C7 N1 C6 115.96(12) . . ?
 K2 N4 K1 78.62(3) . . ?
 C21 N4 K1 137.07(9) . . ?
 C21 N4 K2 122.63(9) . . ?
 C20 N4 K1 86.44(7) . . ?
 C20 N4 K2 100.69(9) . . ?
 C20 N4 C21 120.07(12) . . ?
 K1 N3 K2 75.23(3) . . ?
 C20 N3 K1 99.86(9) . . ?
 C20 N3 K2 79.68(8) . . ?
 C20 N3 C19 120.02(13) . . ?
 C19 N3 K1 130.75(8) . . ?
 C19 N3 K2 135.61(9) . . ?
 K2 N2 K1 81.82(3) . . ?
 C8 N2 K1 123.41(9) . . ?
 C8 N2 K2 131.75(8) . . ?
 C7 N2 K1 82.57(8) . . ?
 C7 N2 K2 106.71(9) . . ?
 C7 N2 C8 116.15(12) . . ?
 N4 C21 C26 128.18(12) . . ?
 N4 C21 C22 118.74(13) . . ?
 C26 C21 C22 112.91(11) . . ?
 F5 C14 C19 116.55(12) . . ?
 F5 C14 C15 118.45(12) . . ?
 C15 C14 C19 124.98(14) . . ?
 F8 C26 C21 117.91(11) . . ?
 F8 C26 C25 117.08(13) . . ?
 C25 C26 C21 124.98(13) . . ?
 N1 C6 C1 119.86(13) . . ?
 C5 C6 N1 126.15(12) . . ?
 C5 C6 C1 113.90(12) . . ?
 K1 C20 K2 68.86(3) . . ?
 N4 C20 K1 69.48(7) . . ?
 N4 C20 K2 56.20(8) . . ?
 N3 C20 K1 56.55(8) . . ?
 N3 C20 K2 77.33(8) . . ?
 N3 C20 N4 118.47(13) . . ?
 N2 C8 C9 120.98(13) . . ?
 N2 C8 C13 124.87(12) . . ?
 C13 C8 C9 113.95(12) . . ?
 F6 C18 C19 117.74(12) . . ?
 F6 C18 C17 117.41(13) . . ?
 C17 C18 C19 124.79(13) . . ?
 N3 C19 C14 118.93(13) . . ?
 N3 C19 C18 127.78(12) . . ?
 C18 C19 C14 113.09(12) . . ?
 F1 C1 C6 116.92(12) . . ?
 F1 C1 C2 118.74(12) . . ?
 C2 C1 C6 124.33(14) . . ?
 C14 C15 C16 118.54(13) . . ?
 C26 C25 C24 118.72(14) . . ?
 C18 C17 C16 118.67(14) . . ?
 F2 C5 C6 117.68(12) . . ?
 F2 C5 C4 117.93(14) . . ?
 C4 C5 C6 124.37(13) . . ?
 C13 C12 C11 117.85(14) . . ?
 K1 C7 K2 70.41(3) . . ?
 N1 C7 K1 66.62(8) . . ?
 N1 C7 K2 74.54(8) . . ?
 N2 C7 K1 71.81(8) . . ?
 N2 C7 K2 51.28(7) . . ?
 N2 C7 N1 119.90(13) . . ?
 C28 C29 C30 102.85(13) . . ?
 C5 C4 C3 118.59(15) . . ?
 C9 C10 C11 118.46(13) . . ?
 C25 C24 C23 119.60(12) . . ?
 F3 C9 C8 116.81(12) . . ?
 F3 C9 C10 118.89(12) . . ?
 C10 C9 C8 124.30(14) . . ?
 F4 C13 C8 117.32(12) . . ?
 F4 C13 C12 117.82(13) . . ?
 C12 C13 C8 124.77(13) . . ?
 O2 C34 C33 106.95(14) . . ?
 C10 C11 C12 120.66(13) . . ?
 C34 C33 C32 104.67(12) . . ?
 O1 C30 K2 49.47(7) . 1_455 ?
 O1 C30 C29 106.02(14) . . ?
 C29 C30 K2 123.37(11) . 1_455 ?
 C31 C32 C33 103.75(14) . . ?
 C1 C2 C3 118.62(13) . . ?
 F7 C22 C21 116.89(11) . . ?
 F7 C22 C23 118.34(12) . . ?
 C23 C22 C21 124.77(14) . . ?
 C22 C23 C24 119.00(13) . . ?
 O1 C27 C28 104.93(14) . . ?
 C2 C3 C4 120.16(13) . . ?
 C27 C28 C29 101.36(13) . . ?
 C15 C16 C17 119.92(13) . . ?
 O2 C31 K1 56.35(8) . 1_655 ?
 O2 C31 C32 105.72(13) . . ?
 C32 C31 K1 147.35(11) . 1_655 ?

_olex2_submission_special_instructions 'No special instructions were received'
